# Supplementary material
Source: publisher figshare collection journal article supplement (https://future-science-group.figshare.com/ndownloader/files/30807493)
Supplement: Supplementary file 1 [file 30807493]

## Sheet: Table S1A
Table S1A - Proteomic data and classification for the Ba-MNPs incubated in plasma for 30 min.
Locus	Length	Unique peptides	Mol w	Sequence count	Spectrum count	NSAF	Coverage	Protein Score	Description
M0RBF1	1663	12	186188	115	1064	0.00569626	0.6615	3299.39	Complement C3 OS=Rattus norvegicus OX=10116 GN=C3 PE=1 SV=1; Additional IDs concatenated into MaxParsimony group: M0RBJ7, P01026; Additional IDs concatenated into MaxParsimony group: M0RBJ7, P01026
M0RBJ7	1662	0	186100	103	1005	0.00538363	0.6384	3084.32	Complement C3 OS=Rattus norvegicus OX=10116 GN=C3 PE=1 SV=1
P01026	1663	0	186324	93	910	0.0048718	0.5821	2810.57	Complement C3 OS=Rattus norvegicus OX=10116 GN=C3 PE=1 SV=3
M0RB00	1734	7	190460	82	754	0.00387135	0.496	2511.72	Complement C4A OS=Rattus norvegicus OX=10116 GN=C4a PE=4 SV=2; Additional IDs concatenated into MaxParsimony group: A0A0G2JW12, Q6MG79, P08649, F1LNM4, A0A0G2JV52, A0A0G2JT52; Additional IDs concatenated into MaxParsimony group: A0A0G2JW12, Q6MG79, P08649, F1LNM4, A0A0G2JV52, A0A0G2JT52
A0A0G2JW12	1737	0	192109	78	737	0.00377753	0.5199	2467	Complement C4-like OS=Rattus norvegicus OX=10116 GN=LOC103689965 PE=4 SV=1
P08649	1737	0	192024	78	737	0.00377753	0.5199	2467	Complement C4 OS=Rattus norvegicus OX=10116 GN=C4 PE=1 SV=3
Q6MG79	1737	0	192052	78	737	0.00377753	0.5199	2467	Complement component 4, gene 1 OS=Rattus norvegicus OX=10116 GN=C4a PE=4 SV=1
F1LNM4	1549	0	170428	76	731	0.00420152	0.5694	2455.63	Complement C4-like (Fragment) OS=Rattus norvegicus OX=10116 GN=LOC103689965 PE=4 SV=2
A0A0G2JV52	1374	0	150790	74	718	0.00465241	0.6201	2421.38	Complement C4A (Fragment) OS=Rattus norvegicus OX=10116 GN=C4a PE=4 SV=4
F7F389	580	3	65225.1	50	691	0.0106069	0.5569	2016.81	Complement component C9 OS=Rattus norvegicus OX=10116 GN=C9 PE=1 SV=1; Additional IDs concatenated into MaxParsimony group: Q5BKC4, Q62930; Additional IDs concatenated into MaxParsimony group: Q5BKC4, Q62930
Q5BKC4	567	0	63715.5	47	680	0.0106774	0.5697	1994.28	C9 protein OS=Rattus norvegicus OX=10116 GN=C9 PE=2 SV=1
Q62930	554	0	62222.6	44	670	0.0107673	0.5704	1980.3	Complement component C9 OS=Rattus norvegicus OX=10116 GN=C9 PE=1 SV=1
Q6MG90	1737	6	191988	63	547	0.00280367	0.4295	1864.76	Complement C4B (Chido blood group) OS=Rattus norvegicus OX=10116 GN=C4b PE=1 SV=1
Q5EBC0	933	1	103673	51	536	0.00511474	0.6677	1774.18	Inter alpha-trypsin inhibitor, heavy chain 4 OS=Rattus norvegicus OX=10116 GN=Itih4 PE=1 SV=1; Additional IDs concatenated into MaxParsimony group: D3ZFC6; Additional IDs concatenated into MaxParsimony group: D3ZFC6
D3ZFC6	932	0	103667	50	528	0.0050438	0.6599	1760.68	Inter-alpha-trypsin inhibitor heavy chain 4 OS=Rattus norvegicus OX=10116 GN=Itih4 PE=1 SV=3
O35802	932	2	103525	51	516	0.00492917	0.6298	1719	Inter-alpha-inhibitor H4 heavy chain OS=Rattus norvegicus OX=10116 GN=ITIH4 PE=2 SV=1
Q6P734	504	34	55558.1	34	449	0.00793151	0.5317	1535.9	Plasma protease C1 inhibitor OS=Rattus norvegicus OX=10116 GN=Serping1 PE=2 SV=1
Q5FVS2	638	5	71218	54	508	0.00708897	0.6599	1484.54	Kallikrein B, plasma 1 OS=Rattus norvegicus OX=10116 GN=Klkb1 PE=1 SV=1; Additional IDs concatenated into MaxParsimony group: P14272; Additional IDs concatenated into MaxParsimony group: P14272
P14272	638	0	71209	49	491	0.00685174	0.6599	1436.99	Plasma kallikrein OS=Rattus norvegicus OX=10116 GN=Klkb1 PE=1 SV=1
contaminant_KERATIN03	593	22	59464.9	42	385	0.00578024	0.5447	1361.88
Q5M7T5	465	19	52182.8	42	401	0.00767771	0.6065	1329.44	Serine (Or cysteine) peptidase inhibitor, clade C (Antithrombin), member 1 OS=Rattus norvegicus OX=10116 GN=Serpinc1 PE=1 SV=1; Additional IDs concatenated into MaxParsimony group: Q7TPI9, A0A096MIW4; Additional IDs concatenated into MaxParsimony group: Q7TPI9, A0A096MIW4
A0A0G2K3G0	536	7	60313.2	33	429	0.00712578	0.5037	1270.59	Histidine-rich glycoprotein OS=Rattus norvegicus OX=10116 GN=Hrg PE=1 SV=1; Additional IDs concatenated into MaxParsimony group: Q99PS8, A0A0G2K9Y5; Additional IDs concatenated into MaxParsimony group: Q99PS8, A0A0G2K9Y5
A0A0G2K9Y5	515	0	57872.2	26	402	0.00694959	0.5243	1206.37	Histidine-rich glycoprotein OS=Rattus norvegicus OX=10116 GN=Hrg PE=1 SV=1
Q99PS8	525	0	58993.7	26	402	0.00681721	0.5143	1206.37	Histidine-rich glycoprotein OS=Rattus norvegicus OX=10116 GN=Hrg PE=1 SV=1
Q71SA3	1170	12	129570	43	422	0.0032112	0.3325	1195.89	Thrombospondin 1 OS=Rattus norvegicus OX=10116 GN=Thbs1 PE=2 SV=1; Additional IDs concatenated into MaxParsimony group: M0R979, A0A0G2JV24, D4A2G6, P49744, A0A0G2K7L8, F1LMS5, A0A0G2JZH3, P35444, M0RBU0, A0A0G2JXN9; Additional IDs concatenated into MaxParsimony group: M0R979, A0A0G2JV24, D4A2G6, P49744, A0A0G2K7L8, F1LMS5, A0A0G2JZH3, M0RBU0, P35444, A0A0G2JXN9
contaminant_KERATIN02	622	43	61931.8	44	312	0.00446585	0.6817	1083.3	; Additional IDs concatenated into MaxParsimony group: A0A0G2K2V6, Q6IFW6, Q6IFU8, Q6IFV1, A0A0G2K9Q9, Q6IFV3, A0A0G2JXJ9, contaminant_KERATIN06, Q6IFU7, Q6IFV0, Q63279, contaminant_KERATIN10, contaminant_KERATIN04, Q6IFV4, A0A221LEF7, Q6IFW8, Q6IFX0, A0A0G2JU48, Q5BJY9, A0A0G2JW58, Q6IFX1, A0A0G2K4H9, Q6IFV5, Q6IFW5, Q6IFV6, F1MAS0, Q6IFV7, Q6IFW2, D3Z7Y6, contaminant_KERATIN09, P25030, contamin…
Q68FP1	780	35	85996.1	35	308	0.00351557	0.5269	1066.41	Gelsolin OS=Rattus norvegicus OX=10116 GN=Gsn PE=1 SV=1
contaminant_KERATIN13	643	27	65436.5	40	322	0.00445846	0.5272	1016.37	; Additional IDs concatenated into MaxParsimony group: Q6P6Q2, F7FFV2, Q4FZU2, A0A0H2UHH5, Q6IG05, Q6IG02, A0A0G2JWX4, Q6IMF3, A0A0G2JST3, Q63280, A0A0G2JVA8, G3V908, A0A0G2JW69, Q10758, contaminant_KERATIN14, Q6IFZ5, A0A0G2JZQ9, Q6IG01, contaminant_KERATIN20, contaminant_KERATIN15, A0A0G2JUG1, Q6IG00, A0A0G2K6P7, Q6IG03, A0A0G2JXH6, P16884, F1LRZ7, A0A0G2K7N1, Q6IG04, G3V712, Q63282; Additional …
Q569B3	617	0	68300.2	24	304	0.0043866	0.4246	934.599	Igh-6 protein OS=Rattus norvegicus OX=10116 GN=Igh-6 PE=2 SV=1
Q4QQW0	591	0	64869.2	24	304	0.00457959	0.4382	932.551	Igh-6 protein (Fragment) OS=Rattus norvegicus OX=10116 GN=Igh-6 PE=2 SV=1
Q569B8	590	1	65028.6	24	302	0.00455717	0.4271	928.604	Igh-6 protein OS=Rattus norvegicus OX=10116 GN=Igh-6 PE=2 SV=1
F1LM30	480	0	52893.3	23	301	0.00558297	0.525	927.251	Immunoglobulin heavy constant mu OS=Rattus norvegicus OX=10116 GN=Ighm PE=1 SV=3
F1LPW0	495	0	54818.3	23	301	0.00541379	0.5091	927.251	Immunoglobulin heavy constant mu OS=Rattus norvegicus OX=10116 GN=Ighm PE=1 SV=1
A0A0G2JVP4	470	0	51657.8	23	301	0.00570176	0.5362	927.251	Immunoglobulin heavy constant mu OS=Rattus norvegicus OX=10116 GN=Ighm PE=1 SV=1
Q3B8R4	595	0	65488.8	23	301	0.00450391	0.4235	927.251	Igh-6 protein OS=Rattus norvegicus OX=10116 GN=Igh-6 PE=2 SV=1
A0A0G2JSK1	416	2	46430	26	256	0.00547882	0.5841	915.245	RCG20603 OS=Rattus norvegicus OX=10116 GN=Serpina3c PE=3 SV=1
P08934	639	2	70870.8	32	319	0.00444457	0.5258	892.602	Kininogen-1 OS=Rattus norvegicus OX=10116 GN=Kng1 PE=2 SV=1; Additional IDs concatenated into MaxParsimony group: P01048, F7EUK4, P08932, A0A0G2KA54, Q63581, A0A0G2KAY3, O09016, Q6LE95, Q6LEK4; Additional IDs concatenated into MaxParsimony group: P01048, F7EUK4, P08932, A0A0G2KA54, Q63581, A0A0G2KAY3, O09016, Q6LE95, Q6LEK4
P05545	416	4	46514.1	25	247	0.0052862	0.5337	880.349	Serine protease inhibitor A3K OS=Rattus norvegicus OX=10116 GN=Serpina3k PE=1 SV=3
P24090	352	3	37940.2	17	216	0.00546325	0.517	872.431	Alpha-2-HS-glycoprotein OS=Rattus norvegicus OX=10116 GN=Ahsg PE=1 SV=2; Additional IDs concatenated into MaxParsimony group: Q7TP75; Additional IDs concatenated into MaxParsimony group: Q7TP75
P02770	608	2	68668.1	32	290	0.00424653	0.4852	854.88	Serum albumin OS=Rattus norvegicus OX=10116 GN=Alb PE=1 SV=2
Q32Q89	427	1	48319.6	27	288	0.00600489	0.5129	850.28	Fgl2 protein (Fragment) OS=Rattus norvegicus OX=10116 GN=Fgl2 PE=2 SV=1; Additional IDs concatenated into MaxParsimony group: G3V7P2, Q5U3X5, Q6IN12, Q9EPT7; Additional IDs concatenated into MaxParsimony group: G3V7P2, Q5U3X5, Q6IN12, Q9EPT7
P20762	329	18	36530.4	25	290	0.0078477	0.7538	849.901	Ig gamma-2C chain C region OS=Rattus norvegicus OX=10116 PE=2 SV=1
G3V7P2	429	0	48606.8	26	287	0.00595614	0.5105	849.266	Fibrinogen-like 2 OS=Rattus norvegicus OX=10116 GN=Fgl2 PE=1 SV=1
Q5U3X5	422	0	47753.3	26	287	0.00605494	0.519	849.266	Fgl2 protein (Fragment) OS=Rattus norvegicus OX=10116 GN=Fgl2 PE=2 SV=1
Q6IN12	419	0	47367.1	26	287	0.00609829	0.5227	849.266	Fgl2 protein (Fragment) OS=Rattus norvegicus OX=10116 GN=Fgl2 PE=2 SV=1
Q5M8A0	433	3	47842.6	32	299	0.00614785	0.6697	827.185	Kng2 protein OS=Rattus norvegicus OX=10116 GN=Kng2l1 PE=2 SV=1
A0A0G2JSH5	608	1	68696.1	31	283	0.00414403	0.4638	825.969	Serum albumin OS=Rattus norvegicus OX=10116 GN=Alb PE=1 SV=1
Q5M7V3	461	0	50898.3	28	278	0.00536888	0.59	808.342	LOC367586 protein OS=Rattus norvegicus OX=10116 GN=LOC367586 PE=2 SV=1; Additional IDs concatenated into MaxParsimony group: Q5BK05, Q5M842, Q5BJZ2, Q4QQW0, P20760, Q3B8R4, F1LPW0, F1LM30, A0A0G2JVP4, F1LPQ6, A0A0G2K9Y0, Q5RK07, F1LN61, Q4VBH1, P20759, Q3SYP8, A0A0G2JT95, A0A0G2K290, M0R8Q9, M0RBL2, A0A0G2JWW4, A0A0G2K304, A0A0G2K4A4, F1LYU3, A0A0G2K3A6, contaminant_NRL_1IKFH, contaminant_NRL_1IN…
Q9EPT7	357	0	40921.9	22	275	0.00685811	0.5182	803.457	Prothrombinase FGL2 OS=Rattus norvegicus OX=10116 PE=2 SV=1
Q5RK07	371	0	40833.6	20	255	0.00611937	0.6011	779.662	Igh-6 protein (Fragment) OS=Rattus norvegicus OX=10116 GN=Igh-6 PE=2 SV=1
F1M6Z1	4506	9	509358	76	281	0.000555207	0.1933	778.986	Apolipoprotein B-100 OS=Rattus norvegicus OX=10116 GN=Apob PE=1 SV=1; Additional IDs concatenated into MaxParsimony group: Q7TMA5, Q63052, Q4G047, Q62970, Q64721, Q63050; Additional IDs concatenated into MaxParsimony group: Q7TMA5, Q63052, Q4G047, Q62970, Q64721, Q63050
Q62905	478	0	54626.2	19	266	0.00495443	0.4184	776.243	Vitronectin OS=Rattus norvegicus OX=10116 PE=2 SV=1
Q3KR94	478	0	54672.2	19	266	0.00495443	0.4184	776.243	Vitronectin OS=Rattus norvegicus OX=10116 GN=Vtn PE=1 SV=1
Q7TQ11	490	0	55906.7	19	266	0.0048331	0.4082	776.243	Aa1018 OS=Rattus norvegicus OX=10116 GN=Vtn PE=1 SV=1; Additional IDs concatenated into MaxParsimony group: Q3KR94, Q62905; Additional IDs concatenated into MaxParsimony group: Q62905, Q3KR94
Q7TMA5	4743	0	535670	67	268	0.000503062	0.1836	757.059	Apolipoprotein B-100 OS=Rattus norvegicus OX=10116 GN=Apob PE=1 SV=1
Q5M842	458	0	50217.8	26	259	0.00503471	0.5655	756.986	IgG-2a protein OS=Rattus norvegicus OX=10116 GN=IgG-2a PE=1 SV=1
Q5BK05	458	0	49893.6	26	259	0.00503471	0.5568	754.409	LOC367586 protein OS=Rattus norvegicus OX=10116 GN=LOC367586 PE=2 SV=1
Q5BJZ2	458	0	50110.6	25	256	0.00497639	0.5415	749.109	LOC367586 protein OS=Rattus norvegicus OX=10116 GN=LOC367586 PE=1 SV=1
A0A096P6L8	2477	2	272258	49	239	0.000859037	0.2725	735.315	Fibronectin OS=Rattus norvegicus OX=10116 GN=Fn1 PE=1 SV=2; Additional IDs concatenated into MaxParsimony group: P04937, F1LST1, Q9Z1G8, Q6LC76; Additional IDs concatenated into MaxParsimony group: P04937, F1LST1, Q9Z1G8, Q6LC76
P20760	322	0	35145.4	24	251	0.00693998	0.7112	731.246	Ig gamma-2A chain C region OS=Rattus norvegicus OX=10116 GN=Igg-2a PE=1 SV=1
P04937	2477	0	272323	47	235	0.00084466	0.2725	729.842	Fibronectin OS=Rattus norvegicus OX=10116 GN=Fn1 PE=1 SV=2
F1LST1	2387	0	262573	47	235	0.000876507	0.2828	729.842	Fibronectin OS=Rattus norvegicus OX=10116 GN=Fn1 PE=1 SV=3
P14046	1477	1	163652	45	239	0.00144065	0.3433	725.003	Alpha-1-inhibitor 3 OS=Rattus norvegicus OX=10116 GN=A1i3 PE=1 SV=1; Additional IDs concatenated into MaxParsimony group: A0A0G2K926, D4AA52, A0A0G2JUW7, A0A0G2JUP5, Q6IE52, M0R5V7, P06238, Q5FX35, Q9JMK6; Additional IDs concatenated into MaxParsimony group: A0A0G2K926, D4AA52, A0A0G2JUW7, A0A0G2JUP5, Q6IE52, M0R5V7, P06238, Q5FX35, Q9JMK6
O70211	603	1	66864.7	20	210	0.00310057	0.4544	724.65	Insulin-like growth factor binding protein complex acid-labile subunit OS=Rattus norvegicus OX=10116 PE=4 SV=1; Additional IDs concatenated into MaxParsimony group: P35859; Additional IDs concatenated into MaxParsimony group: P35859
F1LRE2	603	1	66838.7	19	205	0.00302675	0.4544	703.785	Insulin-like growth factor binding protein, acid labile subunit, isoform CRA_b OS=Rattus norvegicus OX=10116 GN=Igfals PE=1 SV=2
P35859	603	0	66751.6	18	198	0.0029234	0.4395	702.014	Insulin-like growth factor-binding protein complex acid labile subunit OS=Rattus norvegicus OX=10116 GN=Igfals PE=1 SV=1
Q4KM66	234	1	25657.5	15	213	0.00810408	0.4274	695.833	LOC500183 protein OS=Rattus norvegicus OX=10116 GN=LOC500183 PE=1 SV=1; Additional IDs concatenated into MaxParsimony group: A0A0G2JZW1, F1M229, B2RZB2, A0A0H2UI36, P01835, P01836, F1LZH0, A0A0G2K3L5, A0A0G2JXF0, M0R816, F1LZY6; Additional IDs concatenated into MaxParsimony group: A0A0G2JZW1, F1M229, B2RZB2, A0A0H2UI36, P01835, P01836, F1LZH0, A0A0G2K3L5, A0A0G2JXF0, F1LZY6, M0R816
A0A0G2K926	1477	0	163600	43	229	0.00138037	0.3196	695.778	Murinoglobulin-1 OS=Rattus norvegicus OX=10116 GN=LOC297568 PE=1 SV=1
D4AA52	1477	0	163598	42	226	0.00136229	0.3087	685.438	Murinoglobulin-1 OS=Rattus norvegicus OX=10116 GN=LOC297568 PE=1 SV=3
F1LTN6	228	0	24881.1	14	210	0.0082002	0.4123	682.973	Uncharacterized protein OS=Rattus norvegicus OX=10116 PE=1 SV=2
F1M229	189	0	20902.1	14	210	0.00989231	0.4974	682.973	Ig-like domain-containing protein OS=Rattus norvegicus OX=10116 PE=1 SV=3
A0A0G2JZW1	223	0	24303.8	14	210	0.00838406	0.4215	682.973	Ig-like domain-containing protein OS=Rattus norvegicus OX=10116 PE=4 SV=1
M0R979	1144	0	126942	31	262	0.00203899	0.236	677.279	Thrombospondin 1 OS=Rattus norvegicus OX=10116 GN=Thbs1 PE=1 SV=2
P09006	418	0	46604.3	26	199	0.00423855	0.567	676.704	Serine protease inhibitor A3N OS=Rattus norvegicus OX=10116 GN=Serpina3n PE=1 SV=3
A0A0H2UHI5	408	0	45434.6	26	199	0.00434243	0.5809	676.704	Serine protease inhibitor A3N OS=Rattus norvegicus OX=10116 GN=Serpina3n PE=1 SV=1
A0A0G2K9B1	432	0	48324.1	26	199	0.00410119	0.5486	676.704	Serine protease inhibitor A3N OS=Rattus norvegicus OX=10116 GN=LOC299282 PE=1 SV=1
A0A0H2UI36	157	0	17020.1	13	205	0.011625	0.5541	675.194	Ig-like domain-containing protein OS=Rattus norvegicus OX=10116 PE=1 SV=1
B2RZB2	233	0	25570.5	13	205	0.00783318	0.3734	675.194	Uncharacterized protein OS=Rattus norvegicus OX=10116 PE=2 SV=1
G3V843	617	4	70322.6	27	224	0.00323224	0.3274	672.601	Prothrombin OS=Rattus norvegicus OX=10116 GN=F2 PE=1 SV=1; Additional IDs concatenated into MaxParsimony group: P18292; Additional IDs concatenated into MaxParsimony group: P18292
Q7TPI9	593	0	66431.7	23	199	0.00298771	0.2411	671.325	Ac2-248 OS=Rattus norvegicus OX=10116 PE=2 SV=1
Q5M8C3	423	4	47998.9	21	218	0.00458835	0.4799	663.077	Serine (Or cysteine) proteinase inhibitor, clade A (Alpha-1 antiproteinase, antitrypsin), member 4 OS=Rattus norvegicus OX=10116 GN=Serpina4 PE=1 SV=1; Additional IDs concatenated into MaxParsimony group: P97569; Additional IDs concatenated into MaxParsimony group: P97569
A0A0G2KB85	430	0	48038	25	194	0.00401674	0.5256	663.021	Serine protease inhibitor A3N OS=Rattus norvegicus OX=10116 GN=LOC299282 PE=1 SV=1
E0A3N4	430	0	47992	25	194	0.00401674	0.5256	663.021	Serpina3n-like protein OS=Rattus norvegicus OX=10116 PE=2 SV=1
A0A0G2JYK0	609	0	67922.4	26	192	0.00280688	0.422	657.919	Serine protease inhibitor A3N OS=Rattus norvegicus OX=10116 GN=LOC299282 PE=1 SV=1
F1LM05	610	0	68105.5	26	192	0.00280228	0.4213	657.919	Serine protease inhibitor A3N OS=Rattus norvegicus OX=10116 GN=LOC299282 PE=1 SV=1
Q7TMB9	611	0	68162.5	26	192	0.00279769	0.4206	657.919	Ab1-021 OS=Rattus norvegicus OX=10116 GN=LOC299282 PE=2 SV=1; Additional IDs concatenated into MaxParsimony group: F1LM05, A0A0G2JYK0, P09006, A0A0H2UHI5, E0A3N4, A0A0G2KB85, P09005, F1M8F5, Q63556; Additional IDs concatenated into MaxParsimony group: F1LM05, A0A0G2JYK0, P09006, A0A0H2UHI5, E0A3N4, A0A0G2KB85, P09005, F1M8F5, Q63556
contaminant_KERATIN22	645	27	65807.4	35	211	0.00291248	0.7426	653.097
P97569	423	0	47972.9	17	203	0.00427263	0.4397	632.996	Kallistatin OS=Rattus norvegicus OX=10116 PE=2 SV=1
P01835	106	0	11575.5	11	193	0.0162103	0.8113	632.854	Ig kappa chain C region, B allele OS=Rattus norvegicus OX=10116 PE=1 SV=1
P18292	617	0	70348.7	23	202	0.00291478	0.3274	629.308	Prothrombin OS=Rattus norvegicus OX=10116 GN=F2 PE=1 SV=1
A0A0G2K4I9	622	11	69535.8	28	190	0.00271959	0.5788	623.679	Coagulation factor XI OS=Rattus norvegicus OX=10116 GN=F11 PE=1 SV=1
A0A0G2K1T8	416	1	46257.9	25	174	0.00372388	0.601	620.109	Serine protease inhibitor A3N OS=Rattus norvegicus OX=10116 GN=LOC299282 PE=1 SV=1
Q6IFW6	526	0	56452.5	18	175	0.00296205	0.2433	585.702	Keratin, type I cytoskeletal 10 OS=Rattus norvegicus OX=10116 GN=Krt10 PE=3 SV=1
A0A0G2K2V6	559	0	56760.7	18	175	0.00278719	0.229	585.702	Keratin, type I cytoskeletal 10 OS=Rattus norvegicus OX=10116 GN=Krt10 PE=1 SV=1
D4A6E3	1487	5	165203	41	197	0.00117949	0.2777	582.404	Murinoglobulin-1 OS=Rattus norvegicus OX=10116 GN=Mug1 PE=1 SV=2
Q03626	1487	0	165203	37	191	0.00114357	0.2912	568.384	Murinoglobulin-1 OS=Rattus norvegicus OX=10116 GN=Mug1 PE=2 SV=1
A0A0G2JV24	1152	0	127771	27	230	0.00177752	0.2005	567.133	Thrombospondin 1 OS=Rattus norvegicus OX=10116 GN=Thbs1 PE=1 SV=1
P05544	413	0	46230.1	25	178	0.00383716	0.5521	562.959	Serine protease inhibitor A3L OS=Rattus norvegicus OX=10116 GN=Serpina3l PE=1 SV=3
A0A0G2JUW7	1487	0	165637	36	187	0.00111962	0.2777	557.044	Murinoglobulin-1 OS=Rattus norvegicus OX=10116 GN=Mug1 PE=4 SV=1
A0A0G2JXK5	413	1	46172.1	25	171	0.00368626	0.5375	553.298	Serine protease inhibitor A3N OS=Rattus norvegicus OX=10116 GN=LOC299282 PE=1 SV=1
P04639	259	18	30025.2	18	181	0.00622184	0.668	549.515	Apolipoprotein A-I OS=Rattus norvegicus OX=10116 GN=Apoa1 PE=1 SV=2
Q5M891	601	1	67139.6	27	239	0.00354049	0.401	539.945	C4b-binding protein alpha chain OS=Rattus norvegicus OX=10116 GN=C4bpa PE=1 SV=1; Additional IDs concatenated into MaxParsimony group: Q63514; Additional IDs concatenated into MaxParsimony group: Q63514
F1LM19	352	3	38304.6	17	161	0.00407215	0.4091	539.72	Uncharacterized protein OS=Rattus norvegicus OX=10116 PE=1 SV=3
Q63514	558	0	62207	26	238	0.00379737	0.4319	537.934	C4b-binding protein alpha chain OS=Rattus norvegicus OX=10116 GN=C4bpa PE=2 SV=1
M0R5V7	1365	0	151849	31	174	0.0011349	0.2403	511.589	Murinoglobulin-2 OS=Rattus norvegicus OX=10116 GN=Mug2 PE=1 SV=2
A9CME3	600	2	66973.5	27	225	0.00333865	0.3883	509.657	Complement component 4 binding protein, alpha OS=Rattus norvegicus OX=10116 GN=C4bpa PE=4 SV=1
Q6IE52	1448	0	161469	31	173	0.0010637	0.2238	507.675	Murinoglobulin-2 OS=Rattus norvegicus OX=10116 GN=Mug2 PE=1 SV=1
A0A0G2JUP5	1450	0	161244	34	171	0.00104995	0.2614	491.198	Murinoglobulin-1 OS=Rattus norvegicus OX=10116 GN=Mug1 PE=4 SV=1
B2RYM3	904	28	100508	28	151	0.00148713	0.4281	480.496	Inter-alpha trypsin inhibitor, heavy chain 1 OS=Rattus norvegicus OX=10116 GN=Itih1 PE=1 SV=1
Q7TP75	553	0	61426.6	13	141	0.00227004	0.2242	464.741	Aa2-066 OS=Rattus norvegicus OX=10116 PE=1 SV=1
A0A0G2K9Y0	467	0	51541.3	20	158	0.00301218	0.3704	458.183	Immunoglobulin heavy constant mu OS=Rattus norvegicus OX=10116 GN=Ighm PE=4 SV=1
F1LPQ6	468	0	51619.3	20	158	0.00300574	0.3697	458.183	Immunoglobulin heavy constant mu OS=Rattus norvegicus OX=10116 GN=Ighm PE=4 SV=2
A0A0G2K477	466	1	51086.3	20	164	0.00313327	0.4249	456.64	Immunoglobulin heavy constant mu OS=Rattus norvegicus OX=10116 GN=Ighm PE=4 SV=1
P01836	106	0	11706.6	8	139	0.0116748	0.4434	449.69	Ig kappa chain C region, A allele OS=Rattus norvegicus OX=10116 PE=1 SV=1
Q01177	812	13	90458.9	28	167	0.00183105	0.4347	447.142	Plasminogen OS=Rattus norvegicus OX=10116 GN=Plg PE=2 SV=2
F1LN61	456	0	50333.7	18	150	0.00292864	0.3553	440.778	Immunoglobulin heavy constant mu OS=Rattus norvegicus OX=10116 GN=Ighm PE=4 SV=3
D3ZBS2	887	3	98987.7	25	144	0.00144537	0.3653	427.111	Inter-alpha-trypsin inhibitor heavy chain H3 OS=Rattus norvegicus OX=10116 GN=Itih3 PE=1 SV=3; Additional IDs concatenated into MaxParsimony group: Q63416; Additional IDs concatenated into MaxParsimony group: Q63416
Q569B4	468	1	52268.8	18	142	0.00270136	0.359	422.56	Ighg protein OS=Rattus norvegicus OX=10116 GN=Ighg PE=1 SV=1
A0A142BM04	203	1	22278	9	120	0.0052629	0.3153	409.62	Anti-F4/80 kappa light chain variable region (Fragment) OS=Rattus norvegicus OX=10116 PE=2 SV=1
Q63416	887	0	99017.6	22	137	0.00137511	0.3653	406.726	Inter-alpha-trypsin inhibitor heavy chain H3 OS=Rattus norvegicus OX=10116 GN=Itih3 PE=2 SV=1
Q62894	562	17	63190	17	155	0.00245547	0.2829	404.794	Extracellular matrix protein 1 OS=Rattus norvegicus OX=10116 GN=Ecm1 PE=1 SV=2
Q4VBH1	467	0	51600.2	17	136	0.00259276	0.3191	398.949	Ighg protein OS=Rattus norvegicus OX=10116 GN=Ighg PE=1 SV=1
Q5PQU1	430	1	47715.6	18	138	0.00285727	0.4442	397.87	Kininogen 1 OS=Rattus norvegicus OX=10116 GN=Kng2 PE=2 SV=1
P55314	589	17	66605.5	17	106	0.00160225	0.3107	396.33	Complement component C8 beta chain OS=Rattus norvegicus OX=10116 GN=C8b PE=2 SV=2
Q6TUF8	556	2	62930.8	19	115	0.00184146	0.3849	388.666	Coagulation factor XI OS=Rattus norvegicus OX=10116 GN=F11 PE=1 SV=1
P01048	430	0	47726.6	17	133	0.00275374	0.407	383.772	T-kininogen 1 OS=Rattus norvegicus OX=10116 GN=Map1 PE=1 SV=2
P20759	326	0	35904.7	16	131	0.00357762	0.3988	381.087	Ig gamma-1 chain C region OS=Rattus norvegicus OX=10116 PE=1 SV=1
Q7TPK2	2102	5	237092	25	133	0.000563325	0.0999	363.224	Ac2-120 OS=Rattus norvegicus OX=10116 GN=F5 PE=2 SV=1; Additional IDs concatenated into MaxParsimony group: A0A0G2K3W2, A0A0G2JXI1; Additional IDs concatenated into MaxParsimony group: A0A0G2K3W2, A0A0G2JXI1
Q63581	430	0	47569.5	15	120	0.00248458	0.3721	357.324	Uncharacterized protein OS=Rattus norvegicus OX=10116 PE=4 SV=1
P25236	385	4	43047.8	11	95	0.00219686	0.2597	347.22	Selenoprotein P OS=Rattus norvegicus OX=10116 GN=Selenop PE=1 SV=2
contaminant_KERATIN21	357	1	39176.6	20	127	0.0031672	0.5602	346.704
G3V9J1	872	7	97260	24	122	0.00124561	0.2672	343.239	Uncharacterized protein OS=Rattus norvegicus OX=10116 PE=1 SV=3
A0A0G2JU99	203	2	22881.3	9	92	0.00403489	0.2808	338.008	Selenoprotein P OS=Rattus norvegicus OX=10116 GN=Selenop PE=1 SV=1
G3V7Z4	397	3	44003.3	18	112	0.0025117	0.4307	335.643	Glia-derived nexin OS=Rattus norvegicus OX=10116 GN=Serpine2 PE=3 SV=1; Additional IDs concatenated into MaxParsimony group: P07092, D3ZPF9, D3ZJK2, F1MAA9, Q6IE44; Additional IDs concatenated into MaxParsimony group: P07092, D3ZPF9, D3ZJK2, Q6IE44, F1MAA9
Q63313	481	0	53548.3	16	127	0.00235071	0.395	318.865	Lipopolysaccharide-binding protein OS=Rattus norvegicus OX=10116 GN=Lbp PE=2 SV=1
Q3MID7	481	0	53446.3	16	127	0.00235071	0.395	318.865	Lipopolysaccharide-binding protein OS=Rattus norvegicus OX=10116 GN=Lbp PE=1 SV=1; Additional IDs concatenated into MaxParsimony group: Q63313; Additional IDs concatenated into MaxParsimony group: Q63313
P08932	430	0	47655.4	16	127	0.00262951	0.3651	315.802	T-kininogen 2 OS=Rattus norvegicus OX=10116 PE=1 SV=2
F7EUK4	432	0	47879.5	16	127	0.00261734	0.3634	315.802	Kininogen-1 OS=Rattus norvegicus OX=10116 GN=Kng1 PE=1 SV=2
A0A0G2JVQ5	635	1	70470.4	16	124	0.00173855	0.2346	312.856	Kininogen-1 OS=Rattus norvegicus OX=10116 GN=Kng1 PE=1 SV=1
Q80ZA3	418	18	46418.2	18	100	0.00212992	0.5048	309.566	Alpha-2 antiplasmin OS=Rattus norvegicus OX=10116 GN=Serpinf1 PE=1 SV=1
A0A0G2KA54	635	0	70381.3	15	121	0.00169649	0.2346	304.376	Kininogen-1 OS=Rattus norvegicus OX=10116 GN=Kng1 PE=1 SV=1
A0A0G2KAY3	398	0	44221	15	121	0.00270671	0.3744	304.376	Kininogen-1 OS=Rattus norvegicus OX=10116 GN=Kng1 PE=1 SV=1
contaminant_KERATIN17	590	4	62405.1	20	117	0.00176553	0.3085	301.449
Q63041	1500	29	167001	29	111	0.000658828	0.27	298.251	Alpha-1-macroglobulin OS=Rattus norvegicus OX=10116 GN=A1m PE=1 SV=1
D3ZWD6	587	14	66212.3	14	90	0.00136504	0.2998	291.072	Complement C8 alpha chain OS=Rattus norvegicus OX=10116 GN=C8a PE=1 SV=1
P07092	397	0	44017.3	15	94	0.00210803	0.3955	289.764	Glia-derived nexin OS=Rattus norvegicus OX=10116 GN=Serpine2 PE=1 SV=1
Q3SYP8	118	0	12912.3	4	84	0.00633778	0.6356	289.716	Igh-6 protein (Fragment) OS=Rattus norvegicus OX=10116 GN=Igh-6 PE=2 SV=1
P02091	147	0	15951.2	12	111	0.00672273	0.8231	289.224	Hemoglobin subunit beta-1 OS=Rattus norvegicus OX=10116 GN=Hbb PE=1 SV=3; Additional IDs concatenated into MaxParsimony group: A0A0G2JSW3, P11517, A0A1K0FUA6, A0A0G2JTW9, Q6PDU6, Q62670, Q63011, Q63223, O88752; Additional IDs concatenated into MaxParsimony group: A0A0G2JSW3, P11517, A0A1K0FUA6, A0A0G2JTW9, Q6PDU6, Q62669, Q63011, Q63223, O88752
contaminant_KERATIN18	562	8	59767.2	25	105	0.00166339	0.4609	287.842
contaminant_KERATIN05	471	1	51481.4	18	105	0.00198476	0.3992	285.536
D4A3E0	1210	18	135500	18	92	0.000676928	0.1736	284.624	Multimerin 1 OS=Rattus norvegicus OX=10116 GN=Mmrn1 PE=4 SV=1
A0A0G2K509	591	0	62734.7	16	100	0.00150644	0.2403	283.127	Keratin, type II cytoskeletal 5 OS=Rattus norvegicus OX=10116 GN=Krt5 PE=1 SV=1
Q68FT8	491	2	54840	17	106	0.00192205	0.3666	282.991	RCG33981, isoform CRA_a OS=Rattus norvegicus OX=10116 GN=Serpinf2 PE=2 SV=1; Additional IDs concatenated into MaxParsimony group: F7FHF3; Additional IDs concatenated into MaxParsimony group: F7FHF3
A0A0G2JSW3	147	0	15937.2	11	107	0.00648047	0.7415	281.592	Globin a4 OS=Rattus norvegicus OX=10116 GN=Hbb PE=1 SV=1
P20761	333	15	36456.2	18	90	0.00240624	0.7417	281.036	Ig gamma-2B chain C region OS=Rattus norvegicus OX=10116 GN=Igh-1a PE=1 SV=1
F7FHF3	554	0	62233.7	15	103	0.00165527	0.3249	276.973	Serpin family F member 2 OS=Rattus norvegicus OX=10116 GN=Serpinf2 PE=1 SV=1
M0RAB8	100	10	11072.5	10	82	0.00730052	0.76	273.759	Ig-like domain-containing protein OS=Rattus norvegicus OX=10116 PE=4 SV=2
F7FFV2	395	0	43969.9	16	104	0.0023441	0.3038	270.8	Keratin, type II cytoskeletal 5 (Fragment) OS=Rattus norvegicus OX=10116 GN=Krt5 PE=1 SV=2
Q6P6Q2	576	0	61769.7	16	104	0.0016075	0.2083	270.8	Keratin, type II cytoskeletal 5 OS=Rattus norvegicus OX=10116 GN=Krt5 PE=1 SV=1
D3ZUU6	202	7	22274.1	7	74	0.00326152	0.3911	260.947	C-type lectin domain family 3, member B OS=Rattus norvegicus OX=10116 GN=Clec3b PE=1 SV=1
A0A0G2K3W2	1688	0	190851	18	95	0.000501062	0.1013	254.809	Coagulation factor V OS=Rattus norvegicus OX=10116 GN=F5 PE=1 SV=1
P11517	147	0	15954.3	10	99	0.00599595	0.6054	250.498	Hemoglobin subunit beta-2 OS=Rattus norvegicus OX=10116 PE=1 SV=2
A0A1K0FUA6	147	0	15954.3	10	99	0.00599595	0.6054	250.498	Globin a2 OS=Rattus norvegicus OX=10116 GN=LOC689064 PE=3 SV=1
contaminant_KERATIN08	469	6	50449.7	18	95	0.0018034	0.3945	249.485
A0A096MIW4	79	0	8864.6	3	58	0.00653644	0.4051	241.501	Serpin family C member 1 (Fragment) OS=Rattus norvegicus OX=10116 GN=Serpinc1 PE=1 SV=1
D3ZFH5	826	12	92293.3	17	81	0.000873062	0.276	231.896	Inter-alpha-trypsin inhibitor heavy chain 2 OS=Rattus norvegicus OX=10116 GN=Itih2 PE=1 SV=3; Additional IDs concatenated into MaxParsimony group: Q498S9; Additional IDs concatenated into MaxParsimony group: Q498S9
P00762	246	4	25924.7	4	69	0.0024972	0.0813	230.942	Anionic trypsin-1 OS=Rattus norvegicus OX=10116 GN=Prss1 PE=1 SV=1
D4A8G5	685	13	74687.8	13	65	0.000844817	0.2949	226.629	Transforming growth factor, beta-induced OS=Rattus norvegicus OX=10116 GN=Tgfbi PE=1 SV=2
D4ACR1	121	5	13686.9	7	69	0.00507696	0.4959	226.377	Ig-like domain-containing protein OS=Rattus norvegicus OX=10116 PE=1 SV=2; Additional IDs concatenated into MaxParsimony group: A0A0G2K828; Additional IDs concatenated into MaxParsimony group: A0A0G2K828
Q6IRS6	393	0	43123.7	11	76	0.00172171	0.3537	219.862	Fetub protein OS=Rattus norvegicus OX=10116 GN=Fetub PE=1 SV=1; Additional IDs concatenated into MaxParsimony group: Q9QX79; Additional IDs concatenated into MaxParsimony group: Q9QX79
Q9QX79	378	0	41517.9	11	76	0.00179004	0.3677	219.862	Fetuin-B OS=Rattus norvegicus OX=10116 GN=Fetub PE=2 SV=2
A0A0H2UI19	603	0	66656.1	14	80	0.00118117	0.2521	214.502	Coagulation factor XII OS=Rattus norvegicus OX=10116 GN=F12 PE=1 SV=1; Additional IDs concatenated into MaxParsimony group: D3ZTE0; Additional IDs concatenated into MaxParsimony group: D3ZTE0
D3ZTE0	595	0	65782.7	14	80	0.00119705	0.2555	214.502	Coagulation factor XII OS=Rattus norvegicus OX=10116 GN=F12 PE=2 SV=1
Q7TP84	759	2	85982.9	17	79	0.000926671	0.2648	212.472	Plasminogen OS=Rattus norvegicus OX=10116 GN=Plg PE=1 SV=1
Q99ME0	111	8	12133.6	8	65	0.00521351	0.4234	196.079	CXC chemokine RTCK1 OS=Rattus norvegicus OX=10116 GN=Ppbp PE=1 SV=1
Q63207	482	0	54212.1	12	76	0.0014038	0.2344	195.964	Coagulation factor X OS=Rattus norvegicus OX=10116 GN=F10 PE=2 SV=1
A0A0H2UHR6	494	0	55430.7	12	76	0.0013697	0.2287	195.964	Coagulation factor X OS=Rattus norvegicus OX=10116 GN=F10 PE=1 SV=1; Additional IDs concatenated into MaxParsimony group: Q63207, Q63109; Additional IDs concatenated into MaxParsimony group: Q63207, Q63109
Q6IFV1	485	0	52632.9	11	72	0.00132169	0.2392	193.781	Keratin, type I cytoskeletal 14 OS=Rattus norvegicus OX=10116 GN=Krt14 PE=2 SV=1
Q4FZU2	552	0	59194.7	10	70	0.00112901	0.1612	193.346	Keratin, type II cytoskeletal 6A OS=Rattus norvegicus OX=10116 GN=Krt6a PE=1 SV=1
A0A0G2JTW9	147	0	15960.3	7	73	0.00442126	0.4422	192.513	Beta-globin OS=Rattus norvegicus OX=10116 GN=Hbb-b1 PE=1 SV=1
Q6IMF3	625	0	64773.1	6	67	0.00095441	0.0848	187.488	Keratin, type II cytoskeletal 1 OS=Rattus norvegicus OX=10116 GN=Krt1 PE=2 SV=1
A0A0G2JST3	625	0	64699.1	6	67	0.00095441	0.0848	187.488	Keratin, type II cytoskeletal 1 OS=Rattus norvegicus OX=10116 GN=Krt1 PE=1 SV=1
P02651	391	1	44410.7	13	71	0.00161667	0.3887	187.211	Apolipoprotein A-IV OS=Rattus norvegicus OX=10116 GN=Apoa4 PE=1 SV=2
A0A0G2JVX7	392	1	44316.7	13	72	0.00163526	0.352	185.261	Apolipoprotein A-IV OS=Rattus norvegicus OX=10116 GN=Apoa4 PE=1 SV=1
P09005	214	0	24184.7	11	71	0.00295382	0.3037	183.797	Serine protease inhibitor 2.1 (Fragment) OS=Rattus norvegicus OX=10116 PE=2 SV=1
A0A3B0J380	257	1	27165.8	5	50	0.00173212	0.2062	181.303	Adiponectin c OS=Rattus norvegicus OX=10116 GN=Adic PE=4 SV=1; Additional IDs concatenated into MaxParsimony group: P31720; Additional IDs concatenated into MaxParsimony group: P31720
A0A0G2JXI1	1833	0	206196	10	58	0.000281712	0.0627	177.979	Coagulation factor V OS=Rattus norvegicus OX=10116 GN=F5 PE=1 SV=1
P31720	245	0	25883.2	4	48	0.00174428	0.2163	176.159	Complement C1q subcomponent subunit A OS=Rattus norvegicus OX=10116 GN=C1qa PE=1 SV=2
Q6IG05	542	0	58972.6	7	64	0.00105129	0.1255	173.677	Keratin, type II cytoskeletal 75 OS=Rattus norvegicus OX=10116 GN=Krt75 PE=3 SV=2
A0A0H2UHH5	573	0	62112.1	7	64	0.00099441	0.1187	173.677	Keratin, type II cytoskeletal 75 OS=Rattus norvegicus OX=10116 GN=Krt75 PE=1 SV=1
P55159	355	9	39315.1	9	58	0.00145459	0.3718	173.404	Serum paraoxonase/arylesterase 1 OS=Rattus norvegicus OX=10116 GN=Pon1 PE=1 SV=3
P20059	460	15	51300.3	15	72	0.00139353	0.3478	173.297	Hemopexin OS=Rattus norvegicus OX=10116 GN=Hpx PE=1 SV=3
P20767	104	7	11292.6	7	59	0.00505078	0.8365	169.007	Ig lambda-2 chain C region OS=Rattus norvegicus OX=10116 PE=4 SV=1
P06765	105	4	11261.3	4	58	0.00491789	0.4381	168.762	Platelet factor 4 OS=Rattus norvegicus OX=10116 GN=Pf4 PE=1 SV=1
contaminant_KERATIN07	473	1	50864.8	8	63	0.00118582	0.1649	168.142
A0A0G2JW69	484	0	52831.8	5	62	0.00114048	0.0661	166.85	Keratin 79 (Fragment) OS=Rattus norvegicus OX=10116 GN=Krt79 PE=1 SV=1
contaminant_KERATIN12	431	1	47927	13	67	0.001384	0.29	165.521
Q7TP24	980	1	107365	16	64	0.000581425	0.1541	162.929	Ba1-667 OS=Rattus norvegicus OX=10116 PE=2 SV=1; Additional IDs concatenated into MaxParsimony group: A0A0G2QC06, Q7TMC7, P12346; Additional IDs concatenated into MaxParsimony group: A0A0G2QC06, Q7TMC7, P12346
Q7TMC7	979	0	107325	15	62	0.000563831	0.1542	157.617	Ab2-417 OS=Rattus norvegicus OX=10116 PE=2 SV=1
A0A0G2QC06	979	0	107322	15	62	0.000563831	0.1542	157.617	Serotransferrin OS=Rattus norvegicus OX=10116 GN=Tf PE=1 SV=1
P12346	698	0	76327.6	15	62	0.000790818	0.2163	157.617	Serotransferrin OS=Rattus norvegicus OX=10116 GN=Tf PE=1 SV=3
Q6IFU8	433	0	48075	12	63	0.00129537	0.2679	155.606	Keratin, type I cytoskeletal 17 OS=Rattus norvegicus OX=10116 GN=Krt17 PE=1 SV=1
A0A0G2JSV6	142	0	15256.8	8	55	0.00344837	0.5845	154.221	Globin c2 OS=Rattus norvegicus OX=10116 GN=Hba-a2 PE=1 SV=1
P01946	142	0	15300.8	8	55	0.00344837	0.5845	154.221	Hemoglobin subunit alpha-1/2 OS=Rattus norvegicus OX=10116 GN=Hba1 PE=1 SV=3
B1H216	142	0	15300.8	8	55	0.00344837	0.5845	154.221	Globin c3 OS=Rattus norvegicus OX=10116 GN=Hba-a1 PE=2 SV=1; Additional IDs concatenated into MaxParsimony group: P01946, A0A0G2JSV6, G3V8R3, Q63910; Additional IDs concatenated into MaxParsimony group: P01946, A0A0G2JSV6, Q63910, G3V8R3
Q4V8L0	211	1	24191.8	9	65	0.00274265	0.3744	150.643	Metalloproteinase inhibitor 3 OS=Rattus norvegicus OX=10116 GN=Timp3 PE=1 SV=1; Additional IDs concatenated into MaxParsimony group: P48032; Additional IDs concatenated into MaxParsimony group: P48032
P48032	211	0	24191.8	8	64	0.00270046	0.3744	149.532	Metalloproteinase inhibitor 3 OS=Rattus norvegicus OX=10116 GN=Timp3 PE=2 SV=1
Q6PAH0	312	1	35723.3	11	49	0.00139824	0.3782	149.27	Apolipoprotein E OS=Rattus norvegicus OX=10116 GN=Apoe PE=2 SV=1; Additional IDs concatenated into MaxParsimony group: A0A0G2K151, Q65ZS7, P02650; Additional IDs concatenated into MaxParsimony group: A0A0G2K151, Q65ZS7, P02650
A0A0G2K9Q9	447	0	49525.5	11	60	0.00119504	0.2304	148.665	Keratin, type I cytoskeletal 17 OS=Rattus norvegicus OX=10116 GN=Krt17 PE=1 SV=1
G3V7N9	253	2	26612.8	9	52	0.00182988	0.332	148.077	Adiponectin a OS=Rattus norvegicus OX=10116 GN=C1qb PE=1 SV=1; Additional IDs concatenated into MaxParsimony group: P31721; Additional IDs concatenated into MaxParsimony group: P31721
P02650	312	0	35713.3	10	48	0.0013697	0.3782	147.404	Apolipoprotein E OS=Rattus norvegicus OX=10116 GN=Apoe PE=1 SV=2
A0A0G2K151	359	0	41155.8	10	48	0.00119038	0.3287	147.404	Apolipoprotein E OS=Rattus norvegicus OX=10116 GN=Apoe PE=1 SV=1
Q65ZS7	336	0	38283.7	10	48	0.00127187	0.3512	147.404	Rat apolipoprotein E protein OS=Rattus norvegicus OX=10116 PE=3 SV=1
Q5I0M1	345	0	38413.7	10	53	0.00136772	0.2841	145.995	Apolipoprotein H OS=Rattus norvegicus OX=10116 GN=Apoh PE=1 SV=1; Additional IDs concatenated into MaxParsimony group: P26644, Q3T940; Additional IDs concatenated into MaxParsimony group: P26644, Q3T940
Q64268	479	0	54498.9	10	57	0.00105945	0.2484	142.95	Heparin cofactor 2 OS=Rattus norvegicus OX=10116 GN=Serpind1 PE=1 SV=1
A0A0G2K8K3	511	0	57968.4	10	57	0.000993102	0.2329	142.95	Heparin cofactor 2 OS=Rattus norvegicus OX=10116 GN=Serpind1 PE=1 SV=1; Additional IDs concatenated into MaxParsimony group: Q64268; Additional IDs concatenated into MaxParsimony group: Q64268
P31721	253	0	26554.8	7	49	0.00172431	0.332	140.894	Complement C1q subcomponent subunit B OS=Rattus norvegicus OX=10116 GN=C1qb PE=1 SV=2
Q64240	349	9	38808	9	45	0.00114796	0.3009	140.758	Protein AMBP OS=Rattus norvegicus OX=10116 GN=Ambp PE=1 SV=1
A0A0H2UHK1	248	0	26051.9	6	46	0.00165138	0.3105	138.833	Complement C1q subcomponent subunit C OS=Rattus norvegicus OX=10116 GN=C1qc PE=1 SV=1
P31722	245	0	25651.7	6	46	0.0016716	0.3143	138.833	Complement C1q subcomponent subunit C OS=Rattus norvegicus OX=10116 GN=C1qc PE=1 SV=2
A0A3B0IYY4	268	0	28168.9	6	46	0.00152814	0.2873	138.833	Adiponectin b OS=Rattus norvegicus OX=10116 GN=Adib PE=4 SV=1; Additional IDs concatenated into MaxParsimony group: A0A0H2UHK1, P31722; Additional IDs concatenated into MaxParsimony group: A0A0H2UHK1, P31722
P19999	238	11	25273.7	11	53	0.00198262	0.395	130.998	Mannose-binding protein A OS=Rattus norvegicus OX=10116 GN=Mbl1 PE=1 SV=1
D3ZPI8	164	9	18384.4	9	43	0.00233434	0.5366	128.964	Complement C8 gamma chain OS=Rattus norvegicus OX=10116 GN=C8g PE=1 SV=1
F1M3X3	117	3	12987.6	5	45	0.00342426	0.4188	127.527	Ig-like domain-containing protein OS=Rattus norvegicus OX=10116 PE=4 SV=2; Additional IDs concatenated into MaxParsimony group: M0R4X3; Additional IDs concatenated into MaxParsimony group: M0R4X3
P97535	456	10	50151.7	10	46	0.000898117	0.2785	126.804	Phospholipase A1 member A OS=Rattus norvegicus OX=10116 GN=Pla1a PE=1 SV=1
contaminant_INT-STD1	607	10	69207.4	11	51	0.000748034	0.1549	124.071	BSA
G3V908	532	0	57555.8	5	44	0.000736345	0.0902	121.719	Type II keratin Kb15 OS=Rattus norvegicus OX=10116 GN=Kb15 PE=2 SV=2
A0A0G2JVA8	537	0	58042.1	5	44	0.000729489	0.0894	121.719	Type II keratin Kb15 OS=Rattus norvegicus OX=10116 GN=Kb15 PE=3 SV=1
Q62975	436	7	50193.8	7	41	0.000837216	0.2064	119.592	Protein Z-dependent protease inhibitor OS=Rattus norvegicus OX=10116 GN=Serpina10 PE=2 SV=2
A0A0G2JXJ9	442	0	47363.8	7	49	0.000986993	0.1335	118.45	Keratin, type I cytoskeletal 14 OS=Rattus norvegicus OX=10116 GN=Krt14 PE=1 SV=1
A0A0G2JZQ9	579	0	62028.8	4	44	0.000676572	0.038	117.249	Keratin, type II cytoskeletal 1b OS=Rattus norvegicus OX=10116 GN=Krt77 PE=3 SV=1
Q6IG01	519	0	57201.6	4	44	0.000754789	0.0424	117.249	Keratin, type II cytoskeletal 1b OS=Rattus norvegicus OX=10116 GN=Krt77 PE=3 SV=1
F1M8F5	410	0	46310	7	37	0.000803448	0.1195	117.208	Similar to BC049975 protein OS=Rattus norvegicus OX=10116 GN=LOC100909605 PE=3 SV=3
A2VCV7	685	1	75506.9	10	36	0.000467899	0.1971	116.779	Mannan-binding lectin serine peptidase 2 OS=Rattus norvegicus OX=10116 GN=Masp2 PE=1 SV=1; Additional IDs concatenated into MaxParsimony group: Q9JJS8, A0A0G2K392; Additional IDs concatenated into MaxParsimony group: Q9JJS8, A0A0G2K392
Q9JJS8	685	0	75600	9	35	0.000454902	0.1971	115.038	Mannan-binding lectin serine protease 2 OS=Rattus norvegicus OX=10116 GN=Masp2 PE=1 SV=2
contaminant_KERATIN06	456	0	49119	6	47	0.000917642	0.1053	112.331
B5DEH7	707	0	80355.2	11	40	0.00050371	0.1825	110.609	C1r protein OS=Rattus norvegicus OX=10116 GN=C1r PE=1 SV=1; Additional IDs concatenated into MaxParsimony group: Q4G030; Additional IDs concatenated into MaxParsimony group: Q4G030
G3V852	2541	9	269486	11	46	0.000161173	0.0527	110.122	RCG55135, isoform CRA_b OS=Rattus norvegicus OX=10116 GN=Tln1 PE=1 SV=1; Additional IDs concatenated into MaxParsimony group: D3ZA84, D4A3B0; Additional IDs concatenated into MaxParsimony group: D3ZA84, D4A3B0
A0A0G2JWX4	684	0	69045.2	6	43	0.000559696	0.0877	109.572	Keratin, type II cytoskeletal 2 epidermal OS=Rattus norvegicus OX=10116 GN=Krt2 PE=1 SV=1
Q6IG02	685	0	69067.2	6	43	0.000558879	0.0876	109.572	Keratin, type II cytoskeletal 2 epidermal OS=Rattus norvegicus OX=10116 GN=Krt2 PE=3 SV=1
Q63280	79	0	9371.6	6	38	0.00428249	0.5063	108.395	Keratin K5 (Fragment) OS=Rattus norvegicus OX=10116 GN=keratin K5 PE=3 SV=1
M0RA79	99	5	10934.4	6	37	0.00332741	0.6162	107.923	Ig-like domain-containing protein OS=Rattus norvegicus OX=10116 PE=1 SV=1
Q63109	161	0	18018.8	7	39	0.00215665	0.4286	104.143	Coagulation factor X (Fragment) OS=Rattus norvegicus OX=10116 PE=3 SV=1
D4A1T6	660	1	75242.5	11	38	0.000512601	0.1773	104.09	Complement C1r OS=Rattus norvegicus OX=10116 GN=C1r PE=1 SV=3
Q6IFU9	463	1	50727.7	7	39	0.000749935	0.1015	104.021	Keratin 16 OS=Rattus norvegicus OX=10116 GN=Krt16 PE=1 SV=1
M0R5R0	675	1	74545.6	9	43	0.000567159	0.1111	103.821	Protein S (Alpha), isoform CRA_b OS=Rattus norvegicus OX=10116 GN=Pros1 PE=1 SV=1; Additional IDs concatenated into MaxParsimony group: P53813, Q62628; Additional IDs concatenated into MaxParsimony group: P53813, Q62628
P53813	675	0	74560.6	8	42	0.000553969	0.1111	102.286	Vitamin K-dependent protein S OS=Rattus norvegicus OX=10116 GN=Pros1 PE=2 SV=1
A0A0G2JUG1	538	0	57405.7	3	35	0.000579196	0.0558	102.111	IF rod domain-containing protein OS=Rattus norvegicus OX=10116 PE=3 SV=1
Q6IFV0	491	0	52545.6	5	37	0.000670904	0.0774	100.221	Type I keratin KA11 OS=Rattus norvegicus OX=10116 GN=Ka11 PE=2 SV=1
Q6PDU6	147	0	16009.2	5	44	0.00266487	0.3333	100.091	Beta-glo OS=Rattus norvegicus OX=10116 GN=Hbb-b1 PE=2 SV=1
Q62669	147	0	15994.2	5	44	0.00266487	0.3333	100.091	Beta-globin OS=Rattus norvegicus OX=10116 GN=LOC103694855 PE=1 SV=1
Q63011	146	0	15878.2	5	44	0.00268312	0.3356	100.091	Zero beta-globin (Fragment) OS=Rattus norvegicus OX=10116 PE=3 SV=1
Q62670	147	0	15951.2	5	44	0.00266487	0.3333	100.091	0 beta-2 globin OS=Rattus norvegicus OX=10116 GN=0 beta-2 globin PE=3 SV=1
Q3T940	266	0	29356.4	6	33	0.00110452	0.2744	98.0702	Apolipoprotein H (Fragment) OS=Rattus norvegicus OX=10116 GN=Apoh PE=2 SV=1
Q6IFV3	447	0	48822.1	7	46	0.0009162	0.1029	95.8838	Keratin, type I cytoskeletal 15 OS=Rattus norvegicus OX=10116 GN=Krt15 PE=1 SV=1
Q6IFU7	452	0	50163.9	6	38	0.000748489	0.1527	95.5206	Keratin, type I cytoskeletal 42 OS=Rattus norvegicus OX=10116 GN=Krt42 PE=3 SV=1
A0A0G2JZ73	415	0	46586.8	11	40	0.000858128	0.3518	95.04	Alpha-1-antiproteinase OS=Rattus norvegicus OX=10116 GN=Serpina1 PE=1 SV=1; Additional IDs concatenated into MaxParsimony group: A0A0G2JY31, P17475; Additional IDs concatenated into MaxParsimony group: P17475, A0A0G2JY31
A0A0G2JY31	411	0	46074.5	11	40	0.000866479	0.3552	95.04	Alpha-1-antiproteinase OS=Rattus norvegicus OX=10116 GN=Serpina1 PE=1 SV=1
P17475	411	0	46088.5	11	40	0.000866479	0.3552	95.04	Alpha-1-antiproteinase OS=Rattus norvegicus OX=10116 GN=Serpina1 PE=1 SV=2
Q10758	483	0	53967.3	5	40	0.000737315	0.058	92.2965	Keratin, type II cytoskeletal 8 OS=Rattus norvegicus OX=10116 GN=Krt8 PE=1 SV=3
Q7TPA5	422	5	46976.6	5	34	0.000717309	0.1611	91.6258	Serpin A11 OS=Rattus norvegicus OX=10116 GN=Serpina11 PE=2 SV=2
P63259	375	0	41747.8	10	37	0.000878437	0.3573	89.6139	Actin, cytoplasmic 2 OS=Rattus norvegicus OX=10116 GN=Actg1 PE=1 SV=1
A0A0G2K3K2	378	0	42040.9	10	37	0.000871465	0.3545	89.6139	Actin, cytoplasmic 1 OS=Rattus norvegicus OX=10116 GN=Actb PE=1 SV=1; Additional IDs concatenated into MaxParsimony group: P60711, P63259, A1Z0K8, P68035, P68136, B0BMT0, P62738, P63269, A0A0G2K4M6, A0A068F1Y2, D3ZRN3, Q99NC6, Q9JLX9, Q63030; Additional IDs concatenated into MaxParsimony group: P63259, P60711, A1Z0K8, P68136, P68035, P62738, B0BMT0, A0A0G2K4M6, P63269, A0A068F1Y2, D3ZRN3, Q99NC6,…
P60711	375	0	41691.7	10	37	0.000878437	0.3573	89.6139	Actin, cytoplasmic 1 OS=Rattus norvegicus OX=10116 GN=Actb PE=1 SV=1
D4A2G6	1172	0	129626	3	30	0.000227894	0.0196	86.7941	Thrombospondin 2 OS=Rattus norvegicus OX=10116 GN=Thbs2 PE=4 SV=2
A0A0U1RRP9	1115	2	123874	10	32	0.000255514	0.0834	85.4288	Complement factor B OS=Rattus norvegicus OX=10116 GN=Cfb PE=1 SV=1; Additional IDs concatenated into MaxParsimony group: Q7TP05, G3V615, Q6MG74; Additional IDs concatenated into MaxParsimony group: Q7TP05, G3V615, Q6MG74
contaminant_KERATIN14	638	0	65812.1	4	34	0.000474459	0.0564	81.2006
contaminant_KERATIN20	483	0	53697.1	4	35	0.00064515	0.0393	80.7133
P26644	297	0	33157.1	6	34	0.00101921	0.1549	79.5389	Beta-2-glycoprotein 1 OS=Rattus norvegicus OX=10116 GN=Apoh PE=2 SV=2
Q7TP05	1116	0	123942	8	29	0.000231352	0.0833	79.1738	Complement factor B OS=Rattus norvegicus OX=10116 GN=Cfb PE=1 SV=1
Q6MG74	761	0	85048.6	8	29	0.000339276	0.1222	79.1738	B-factor, properdin OS=Rattus norvegicus OX=10116 GN=Cfb PE=2 SV=1
G3V615	763	0	85280.7	8	29	0.000338387	0.1219	79.1738	Complement factor B OS=Rattus norvegicus OX=10116 GN=Cfb PE=1 SV=1
Q9EQV8	457	7	51930.1	7	27	0.000526002	0.1838	78.5361	Carboxypeptidase N catalytic chain OS=Rattus norvegicus OX=10116 GN=Cpn1 PE=2 SV=1
Q498S9	568	0	62848.4	5	28	0.000438884	0.1426	75.4279	LOC498793 protein (Fragment) OS=Rattus norvegicus OX=10116 GN=LOC498793 PE=2 SV=1
contaminant_KERATIN15	629	0	64453.6	3	30	0.00042463	0.0445	73.4922
Q62628	346	0	38055.4	6	30	0.000771943	0.1705	72.9928	Protein S (Fragment) OS=Rattus norvegicus OX=10116 PE=2 SV=1
D3ZJW6	117	1	13036.6	3	24	0.00182627	0.2991	69.9442	RCG21066 OS=Rattus norvegicus OX=10116 GN=rCG_21066 PE=1 SV=1
P62632	463	3	50404.3	7	26	0.000499957	0.2268	68.8536	Elongation factor 1-alpha 2 OS=Rattus norvegicus OX=10116 GN=Eef1a2 PE=1 SV=1; Additional IDs concatenated into MaxParsimony group: P62630, F1M6C2; Additional IDs concatenated into MaxParsimony group: M0R757, F1M6C2
A0A0G2JU48	435	0	46372.9	2	22	0.000450271	0.0506	68.7993	Type I keratin KA11 OS=Rattus norvegicus OX=10116 GN=Ka11 PE=3 SV=1
A0A0G2JW58	298	0	33466.4	2	22	0.000657274	0.0738	68.7993	Type I keratin KA11 (Fragment) OS=Rattus norvegicus OX=10116 GN=Ka11 PE=3 SV=1
A0A096P6L9	1681	1	188943	13	25	0.000132407	0.0999	67.2822	Complement C5 OS=Rattus norvegicus OX=10116 GN=C5 PE=1 SV=2; Additional IDs concatenated into MaxParsimony group: A0A1B0GWS5, A0A1B0GWQ4; Additional IDs concatenated into MaxParsimony group: A0A1B0GWS5, A0A1B0GWQ4
Q6IG00	536	0	57613	3	26	0.000431866	0.0522	66.954	Keratin, type II cytoskeletal 4 OS=Rattus norvegicus OX=10116 GN=Krt4 PE=3 SV=1
A0A0G2K6P7	526	0	56505.4	3	26	0.000440076	0.0532	66.954	Keratin, type II cytoskeletal 4 OS=Rattus norvegicus OX=10116 GN=Krt4 PE=3 SV=1
A1Z0K8	283	0	31708.9	7	27	0.00084941	0.3534	65.5964	Beta-actin (Fragment) OS=Rattus norvegicus OX=10116 PE=2 SV=1
H6X2V2	230	0	25341.7	3	25	0.000967726	0.1391	65.2651	Pentaxin OS=Rattus norvegicus OX=10116 GN=crp PE=3 SV=1
H6X2W5	230	0	25433.7	3	25	0.000967726	0.1391	65.2651	Pentaxin OS=Rattus norvegicus OX=10116 GN=Crp PE=3 SV=1
H6X2X0	230	0	25407.7	3	25	0.000967726	0.1391	65.2651	Pentaxin OS=Rattus norvegicus OX=10116 GN=crp PE=3 SV=1
Q7TMA9	1015	0	116369	3	25	0.000219288	0.0315	65.2651	Aa1249 OS=Rattus norvegicus OX=10116 PE=2 SV=1
H6X2W6	230	0	25429.7	3	25	0.000967726	0.1391	65.2651	Pentaxin OS=Rattus norvegicus OX=10116 GN=crp PE=3 SV=1
H6X2V8	230	0	25463.7	3	25	0.000967726	0.1391	65.2651	Pentaxin OS=Rattus norvegicus OX=10116 GN=crp PE=3 SV=1
H6X2W4	230	0	25401.7	3	25	0.000967726	0.1391	65.2651	Pentaxin OS=Rattus norvegicus OX=10116 GN=crp PE=3 SV=1
H6X2V4	230	0	25467.7	3	25	0.000967726	0.1391	65.2651	Pentaxin OS=Rattus norvegicus OX=10116 GN=crp PE=3 SV=1
A0A0G2K8V5	1017	0	116413	3	25	0.000218856	0.0315	65.2651	C-reactive protein OS=Rattus norvegicus OX=10116 GN=Crp PE=1 SV=1; Additional IDs concatenated into MaxParsimony group: Q7TMA9, H6X2V4, H6X2V8, H6X2W4, H6X2W1, H6X2W6, H6X2W5, H6X2W7, H6X2W2, P48199, H6X2W3, H6X2V2, H6X2V9, H6X2X0, H6X2V7, H6X2V3, H6X2W0; Additional IDs concatenated into MaxParsimony group: Q7TMA9, H6X2W1, P48199, H6X2W3, H6X2W7, H6X2V9, H6X2V7, H6X2V4, H6X2W5, H6X2X0, H6X2W6, H6…
H6X2W1	230	0	25408.6	3	25	0.000967726	0.1391	65.2651	Pentaxin OS=Rattus norvegicus OX=10116 GN=crp PE=3 SV=1
H6X2V7	230	0	25431.7	3	25	0.000967726	0.1391	65.2651	Pentaxin OS=Rattus norvegicus OX=10116 GN=crp PE=3 SV=1
P48199	230	0	25433.7	3	25	0.000967726	0.1391	65.2651	C-reactive protein OS=Rattus norvegicus OX=10116 GN=Crp PE=1 SV=1
H6X2V9	230	0	25445.8	3	25	0.000967726	0.1391	65.2651	Pentaxin OS=Rattus norvegicus OX=10116 GN=crp PE=3 SV=1
H6X2W3	230	0	25417.7	3	25	0.000967726	0.1391	65.2651	Pentaxin OS=Rattus norvegicus OX=10116 GN=crp PE=3 SV=1
H6X2W7	230	0	25407.7	3	25	0.000967726	0.1391	65.2651	Pentaxin OS=Rattus norvegicus OX=10116 GN=crp PE=3 SV=1
H6X2W2	230	0	25409.6	3	25	0.000967726	0.1391	65.2651	Pentaxin OS=Rattus norvegicus OX=10116 GN=crp PE=3 SV=1
Q6IFZ5	581	0	61702.5	4	27	0.00041374	0.0637	65.1682	Keratin 76 OS=Rattus norvegicus OX=10116 GN=Krt76 PE=2 SV=1
Q63279	403	0	44590.6	5	32	0.000706944	0.0893	64.5133	Keratin, type I cytoskeletal 19 OS=Rattus norvegicus OX=10116 GN=Krt19 PE=1 SV=2
contaminant_KERATIN10	400	0	44061.1	5	32	0.000712246	0.09	64.5133
A0A0G2JZS9	97	3	10786.2	3	23	0.00211104	0.3814	64.4436	Ig-like domain-containing protein OS=Rattus norvegicus OX=10116 PE=1 SV=1
A0A0G2JW41	118	1	13004.3	2	18	0.0013581	0.2627	63.5718	Ig-like domain-containing protein OS=Rattus norvegicus OX=10116 PE=1 SV=1
Q63556	412	0	46048.1	5	24	0.000518626	0.1214	62.8948	Serine protease inhibitor A3M (Fragment) OS=Rattus norvegicus OX=10116 GN=Serpina3m PE=2 SV=1
F1LR92	419	0	46793.5	5	24	0.000509961	0.1193	62.8948	Serine protease inhibitor A3M OS=Rattus norvegicus OX=10116 GN=Serpina3m PE=1 SV=3
A0A0G2K7X7	846	6	93585.5	6	21	0.000220998	0.0887	59.3878	Complement C7 OS=Rattus norvegicus OX=10116 GN=C7 PE=1 SV=1
Q6IFV4	438	0	47681.3	3	23	0.000467513	0.0685	59.273	Keratin, type I cytoskeletal 13 OS=Rattus norvegicus OX=10116 GN=Krt13 PE=3 SV=1
A0A0G2K290	124	0	13877.7	3	22	0.00157958	0.1935	59.2336	Ig-like domain-containing protein OS=Rattus norvegicus OX=10116 PE=4 SV=1
A0A0G2JWW4	117	0	12868.4	3	22	0.00167408	0.2051	59.2336	Ig-like domain-containing protein OS=Rattus norvegicus OX=10116 PE=4 SV=1
A0A0G2K3A6	110	0	12206.9	3	22	0.00178062	0.2182	59.2336	Ig-like domain-containing protein OS=Rattus norvegicus OX=10116 PE=4 SV=1
A0A0G2K304	116	0	12563.4	3	22	0.00168851	0.2069	59.2336	Ig-like domain-containing protein OS=Rattus norvegicus OX=10116 PE=4 SV=1
M0RBL2	117	0	12803.1	3	22	0.00167408	0.2051	59.2336	Ig-like domain-containing protein OS=Rattus norvegicus OX=10116 PE=4 SV=1
A0A0G2JT95	135	0	14874.5	3	22	0.00145087	0.1778	59.2336	Ig-like domain-containing protein OS=Rattus norvegicus OX=10116 PE=4 SV=1
A0A0G2K4A4	116	0	12666.3	3	22	0.00168851	0.2069	59.2336	Ig-like domain-containing protein OS=Rattus norvegicus OX=10116 PE=4 SV=1
M0R8Q9	117	0	12820.4	3	22	0.00167408	0.2051	59.2336	Ig-like domain-containing protein OS=Rattus norvegicus OX=10116 PE=4 SV=2
F1LYU3	113	0	12275.9	3	22	0.00173334	0.2124	59.2336	Ig-like domain-containing protein OS=Rattus norvegicus OX=10116 PE=4 SV=2
A0A0H2UHA1	704	1	80043.5	7	22	0.000278221	0.1293	56.3732	Mannan-binding lectin serine protease 1 OS=Rattus norvegicus OX=10116 GN=Masp1 PE=1 SV=1; Additional IDs concatenated into MaxParsimony group: Q8CHN8, Q8CG43; Additional IDs concatenated into MaxParsimony group: Q8CHN8, Q8CG43
P01015	477	7	51930.9	7	23	0.000429289	0.1572	55.2357	Angiotensinogen OS=Rattus norvegicus OX=10116 GN=Agt PE=1 SV=1
Q8CHN8	704	0	80027.5	6	21	0.000265575	0.1293	54.6605	Mannan-binding lectin serine protease 1 OS=Rattus norvegicus OX=10116 GN=Masp1 PE=1 SV=2
M0R5S4	118	0	13185.4	2	19	0.00143355	0.2034	54.6011	Ig-like domain-containing protein OS=Rattus norvegicus OX=10116 PE=4 SV=1
A0A0G2JUY4	110	0	12394	2	19	0.0015378	0.2182	54.6011	Ig-like domain-containing protein OS=Rattus norvegicus OX=10116 PE=1 SV=1
A0A0G2JYX2	118	0	12836.1	2	19	0.00143355	0.2034	54.6011	Ig-like domain-containing protein OS=Rattus norvegicus OX=10116 PE=1 SV=1
Q91WX0	699	3	78240.1	8	28	0.000356633	0.1373	53.3812	Complement factor H-related protein OS=Rattus norvegicus OX=10116 PE=2 SV=2; Additional IDs concatenated into MaxParsimony group: A0A0G2K975; Additional IDs concatenated into MaxParsimony group: A0A0G2K975
Q6IG03	553	0	60331.4	2	17	0.000273693	0.0362	52.5095	Keratin, type II cytoskeletal 73 OS=Rattus norvegicus OX=10116 GN=Krt73 PE=1 SV=1
A0A0G2JXH6	539	0	58726.6	2	17	0.000280802	0.0371	52.5095	Keratin, type II cytoskeletal 73 OS=Rattus norvegicus OX=10116 GN=Krt73 PE=1 SV=1
F1LRA5	1060	1	115725	7	22	0.000184781	0.0745	52.4053	Proteoglycan 4 OS=Rattus norvegicus OX=10116 GN=Prg4 PE=1 SV=2
contaminant_KERATIN04	458	0	49595.4	3	17	0.000330464	0.0764	52.0271
M0R757	462	0	50058.1	5	20	0.000385415	0.1147	51.4156	Elongation factor 1-alpha OS=Rattus norvegicus OX=10116 GN=LOC100360413 PE=3 SV=1
P62630	462	0	50064.1	5	20	0.000385415	0.1147	51.4156	Elongation factor 1-alpha 1 OS=Rattus norvegicus OX=10116 GN=Eef1a1 PE=2 SV=1
Q8CG43	697	0	78157.7	5	20	0.000255468	0.0918	51.3982	MASP-3 protein (Fragment) OS=Rattus norvegicus OX=10116 GN=masp1-3 PE=3 SV=1
P19939	88	1	9836.3	4	22	0.00222577	0.4205	49.4508	Apolipoprotein C-I OS=Rattus norvegicus OX=10116 GN=Apoc1 PE=3 SV=1; Additional IDs concatenated into MaxParsimony group: A0A0G2K9R5, M0R547; Additional IDs concatenated into MaxParsimony group: A0A0G2K9R5, M0R547
Q68FR2	507	7	55066.7	7	17	0.000298525	0.1992	49.2539	Bridging integrator 2 OS=Rattus norvegicus OX=10116 GN=Bin2 PE=1 SV=1
P31394	461	0	51860.3	6	22	0.000424876	0.1367	48.5282	Vitamin K-dependent protein C OS=Rattus norvegicus OX=10116 GN=Proc PE=2 SV=1
Q68FY8	461	0	51775.2	6	22	0.000424876	0.1367	48.5282	Protein C OS=Rattus norvegicus OX=10116 GN=Proc PE=2 SV=1
F7FMY6	482	0	53962.2	6	22	0.000406364	0.1307	48.5282	Protein C, isoform CRA_b OS=Rattus norvegicus OX=10116 GN=Proc PE=1 SV=1; Additional IDs concatenated into MaxParsimony group: P31394, Q68FY8; Additional IDs concatenated into MaxParsimony group: Q68FY8, P31394
O09016	126	0	14065.8	2	15	0.00105989	0.246	48.2537	K-kininogen (Fragment) OS=Rattus norvegicus OX=10116 GN=Kngk PE=4 SV=1
A0A0G2K392	184	0	20817.1	5	15	0.000725794	0.4239	48.171	Mannan-binding lectin serine protease 2 OS=Rattus norvegicus OX=10116 GN=Masp2 PE=4 SV=1
F1LZ11	124	4	14039.7	4	15	0.00107699	0.2984	48.1023	Ig-like domain-containing protein OS=Rattus norvegicus OX=10116 PE=1 SV=1
Q9Z1G8	148	0	15971.9	2	14	0.000842183	0.2635	47.7598	Fibronectin (Fragment) OS=Rattus norvegicus OX=10116 PE=4 SV=1
P31211	396	5	44624.3	6	23	0.000517098	0.1465	47.3294	Corticosteroid-binding globulin OS=Rattus norvegicus OX=10116 GN=Serpina6 PE=1 SV=2
A0A0G2K828	119	0	13195.6	2	18	0.00134668	0.1429	46.7293	Ig-like domain-containing protein OS=Rattus norvegicus OX=10116 PE=4 SV=1
Q63223	51	0	5575.9	2	20	0.0034914	0.4118	45.6191	Rat hemoglobin beta-chain (Fragment) OS=Rattus norvegicus OX=10116 PE=2 SV=1
B0BNA0	445	1	49581.7	7	17	0.000340118	0.1596	45.4952	Prg4 protein (Fragment) OS=Rattus norvegicus OX=10116 GN=Prg4 PE=2 SV=1
P68136	377	0	42005.8	6	21	0.000495927	0.1671	45.4758	Actin, alpha skeletal muscle OS=Rattus norvegicus OX=10116 GN=Acta1 PE=1 SV=1
P68035	377	0	41973.9	6	21	0.000495927	0.1671	45.4758	Actin, alpha cardiac muscle 1 OS=Rattus norvegicus OX=10116 GN=Actc1 PE=2 SV=1
A0A068F1Y2	186	0	20408.1	4	17	0.000813722	0.2688	45.4594	Beta-actin (Fragment) OS=Rattus norvegicus OX=10116 GN=Actb PE=2 SV=1
H6X2W0	230	0	25251.6	2	15	0.000580635	0.0957	45.0595	Pentaxin OS=Rattus norvegicus OX=10116 GN=crp PE=3 SV=1
H6X2V3	230	0	25447.7	2	15	0.000580635	0.0957	45.0595	Pentaxin OS=Rattus norvegicus OX=10116 GN=crp PE=3 SV=1
A0A1B0GWS5	1350	0	150911	8	14	9.23282e-05	0.0881	44.9243	Complement C5 (Fragment) OS=Rattus norvegicus OX=10116 GN=C5 PE=1 SV=1
Q71RP1	536	1	60423.6	5	20	0.000332204	0.0989	44.2029	Heparanase OS=Rattus norvegicus OX=10116 GN=Hpse PE=2 SV=1; Additional IDs concatenated into MaxParsimony group: F1M581; Additional IDs concatenated into MaxParsimony group: F1M581
P63269	376	0	41831.8	5	20	0.000473568	0.1383	42.9949	Actin, gamma-enteric smooth muscle OS=Rattus norvegicus OX=10116 GN=Actg2 PE=2 SV=1
B0BMT0	377	0	41963.8	5	20	0.000472312	0.1379	42.9949	RCG47746, isoform CRA_a OS=Rattus norvegicus OX=10116 GN=Acta2 PE=2 SV=1
A0A0G2K4M6	376	0	41879.7	5	20	0.000473568	0.1383	42.9949	Actin, aortic smooth muscle OS=Rattus norvegicus OX=10116 GN=Acta2 PE=3 SV=1
P62738	377	0	41963.8	5	20	0.000472312	0.1379	42.9949	Actin, aortic smooth muscle OS=Rattus norvegicus OX=10116 GN=Acta2 PE=2 SV=1
G3V836	447	0	51369.3	4	13	0.000258926	0.1342	42.8264	Clusterin OS=Rattus norvegicus OX=10116 GN=Clu PE=1 SV=1
Q6P7S6	447	0	51413.4	4	13	0.000258926	0.1342	42.8264	Clusterin OS=Rattus norvegicus OX=10116 GN=Clu PE=2 SV=1
Q9ERD1	218	0	24897.2	4	13	0.000530917	0.2752	42.8264	Clusterin (Fragment) OS=Rattus norvegicus OX=10116 PE=2 SV=1
P05371	447	0	51324.3	4	13	0.000258926	0.1342	42.8264	Clusterin OS=Rattus norvegicus OX=10116 GN=Clu PE=1 SV=2; Additional IDs concatenated into MaxParsimony group: Q6P7S6, G3V836, Q9ERD1, O35510, A0A0G2KB42; Additional IDs concatenated into MaxParsimony group: Q6P7S6, G3V836, Q9ERD1, O35510, A0A0G2KB42
M0R4X3	96	0	10682.2	2	15	0.00139111	0.1146	42.6306	Ig-like domain-containing protein OS=Rattus norvegicus OX=10116 PE=1 SV=1
A0A0G2K9R5	69	0	7539.1	3	18	0.00232254	0.4058	42.3442	Apolipoprotein C-I OS=Rattus norvegicus OX=10116 GN=Apoc1 PE=4 SV=1
M0R3Y4	118	0	12816.9	1	14	0.0010563	0.1102	41.8289	Ig-like domain-containing protein OS=Rattus norvegicus OX=10116 PE=4 SV=1
D3ZE00	98	0	10824.2	1	14	0.00127187	0.1327	41.8289	Ig-like domain-containing protein OS=Rattus norvegicus OX=10116 PE=1 SV=3
A0A0G2K473	117	0	12957.4	1	14	0.00106533	0.1111	41.8289	Ig-like domain-containing protein OS=Rattus norvegicus OX=10116 PE=4 SV=1
F1M0H4	118	0	13168.2	1	14	0.0010563	0.1102	41.8289	Ig-like domain-containing protein OS=Rattus norvegicus OX=10116 PE=4 SV=2
A0A0G2K758	166	0	18191.1	1	14	0.000750862	0.0783	41.8289	Ig-like domain-containing protein OS=Rattus norvegicus OX=10116 PE=4 SV=1
G3V7P5	699	1	78227.1	6	23	0.000292948	0.0644	41.4002	RCG46174 OS=Rattus norvegicus OX=10116 GN=RGD1564614 PE=1 SV=1
Q63052	989	0	113217	9	18	0.000162038	0.1173	40.9798	Apolipoprotein B (Fragment) OS=Rattus norvegicus OX=10116 GN=apoB PE=2 SV=1
Q4G030	364	0	41085.2	8	20	0.00048918	0.2198	40.2873	C1r protein (Fragment) OS=Rattus norvegicus OX=10116 GN=C1r PE=2 SV=1
contaminant_UBIQUITIN08	76	0	8541.6	4	17	0.00199148	0.5658	40.2054
Q63429	810	0	91013	4	17	0.000186855	0.0531	40.2054	Polyubiquitin-C OS=Rattus norvegicus OX=10116 GN=Ubc PE=1 SV=1; Additional IDs concatenated into MaxParsimony group: F1LML2, Q5FWT0, P0CG51, P62982, Q6PED0, P62986, Q6P7R7, Q63654, contaminant_UBIQUITIN08, F1LU69, F1M927, D4A0J6
Q63654	100	0	11216	4	17	0.00151352	0.43	40.2054	Polyubiquitin (Fragment) OS=Rattus norvegicus OX=10116 GN=UBC PE=2 SV=1
Q6P7R7	128	0	14700.9	4	17	0.00118244	0.3359	40.2054	Ubiquitin A-52 residue ribosomal protein fusion product 1 OS=Rattus norvegicus OX=10116 GN=Uba52 PE=2 SV=1
Q5FWT0	656	0	73656.7	4	17	0.00023072	0.0655	40.2054	Ubc protein (Fragment) OS=Rattus norvegicus OX=10116 GN=Ubc PE=2 SV=1
F1LML2	810	0	90999	4	17	0.000186855	0.0531	40.2054	Polyubiquitin-C OS=Rattus norvegicus OX=10116 GN=Ubc PE=4 SV=1; Additional IDs concatenated into MaxParsimony group: Q63429, Q5FWT0, P0CG51, Q6PED0, P62982, Q6P7R7, P62986, Q63654, contaminant_UBIQUITIN08, F1LU69, F1M927, D4A0J6
Q6PED0	156	0	17921.5	4	17	0.000970207	0.2756	40.2054	RCG23287, isoform CRA_a OS=Rattus norvegicus OX=10116 GN=Rps27a PE=2 SV=1
P62982	156	0	17921.5	4	17	0.000970207	0.2756	40.2054	Ubiquitin-40S ribosomal protein S27a OS=Rattus norvegicus OX=10116 GN=Rps27a PE=1 SV=2
P0CG51	305	0	34329.5	4	17	0.000496237	0.141	40.2054	Polyubiquitin-B OS=Rattus norvegicus OX=10116 GN=Ubb PE=1 SV=1
P62986	128	0	14700.9	4	17	0.00118244	0.3359	40.2054	Ubiquitin-60S ribosomal protein L40 OS=Rattus norvegicus OX=10116 GN=Uba52 PE=1 SV=2
A0A0G2K975	764	0	85734.8	5	22	0.000256371	0.0589	39.3033	Similar to complement factor H-related protein OS=Rattus norvegicus OX=10116 GN=RGD1564614 PE=1 SV=1
contaminant_KERATIN11	424	0	48438.9	1	12	0.000251974	0.0259	38.5556
D3Z7Y6	431	0	49050.9	1	12	0.000247881	0.0255	38.5556	Keratin, type I cytoskeletal 20 OS=Rattus norvegicus OX=10116 GN=Krt20 PE=1 SV=3
P25030	429	0	49339.3	1	12	0.000249037	0.0256	38.5556	Keratin, type I cytoskeletal 20 OS=Rattus norvegicus OX=10116 GN=Krt20 PE=1 SV=2
A0A0G2K623	214	0	24898	1	12	0.000499238	0.0514	38.5556	Keratin, type I cytoskeletal 20 (Fragment) OS=Rattus norvegicus OX=10116 GN=Krt20 PE=1 SV=1
F1LU69	150	0	17105.9	3	16	0.000949661	0.2267	38.5227	Ubiquitin-like domain-containing protein OS=Rattus norvegicus OX=10116 GN=Rps27a-ps28 PE=4 SV=3
F1M1R0	136	2	14866.2	3	13	0.000851029	0.2426	38.3762	Ig-like domain-containing protein OS=Rattus norvegicus OX=10116 GN=LOC690813 PE=1 SV=2; Additional IDs concatenated into MaxParsimony group: F1M195, A0A0G2JWF2, A0A0G2JTG4; Additional IDs concatenated into MaxParsimony group: F1M195, A0A0G2JWF2, A0A0G2JTG4
contaminant_NRL_1INDH	213	0	22606.4	2	12	0.000501582	0.0563	38.2955	Cha255 immunoglobulin fab' fragment (igg1-lambda) complex With...
contaminant_NRL_1IKFH	228	0	24722.2	2	12	0.000468583	0.0526	38.2955	Immunoglobulin igg1-kappa antibody fragment fab complexed With...
D3ZA84	2542	0	271496	2	14	4.90335e-05	0.009	34.1682	Talin 2 OS=Rattus norvegicus OX=10116 GN=Tln2 PE=1 SV=3
D4A3B0	2375	0	253467	2	14	5.24813e-05	0.0097	34.1682	Talin 2 OS=Rattus norvegicus OX=10116 GN=Tln2 PE=1 SV=3
A0A0G2JXF0	108	0	11775.8	1	10	0.000824359	0.1389	34.1623	Ig-like domain-containing protein OS=Rattus norvegicus OX=10116 PE=1 SV=1
A0A0G2K3L5	115	0	12811.3	1	10	0.000774181	0.1304	34.1623	Ig-like domain-containing protein OS=Rattus norvegicus OX=10116 PE=4 SV=1
F1M6C2	410	0	44256.7	3	14	0.000304007	0.0756	34.1089	Tr-type G domain-containing protein OS=Rattus norvegicus OX=10116 PE=1 SV=1
Q91ZE7	849	1	94234.8	5	13	0.000136325	0.0577	33.6677	Anion exchange protein OS=Rattus norvegicus OX=10116 PE=2 SV=1; Additional IDs concatenated into MaxParsimony group: F8WFT7, P23562, Q5U329; Additional IDs concatenated into MaxParsimony group: F8WFT7, P23562, Q5U329
A0A0G2JY98	140	1	15353.8	2	11	0.000699527	0.1643	33.4884	Ig-like domain-containing protein OS=Rattus norvegicus OX=10116 PE=1 SV=1; Additional IDs concatenated into MaxParsimony group: A0A0G2K9Z5; Additional IDs concatenated into MaxParsimony group: A0A0G2K9Z5
P04797	333	0	35787.2	6	11	0.000294096	0.2042	33.0367	Glyceraldehyde-3-phosphate dehydrogenase OS=Rattus norvegicus OX=10116 GN=Gapdh PE=1 SV=3; Additional IDs concatenated into MaxParsimony group: M0R590, M0R660, D3ZGY4, E9PTN6, Q0QEU1, E9PTV9, P97617, A0A0G2K8S2, Q498M9, F1M4G6, F1M2N4, D3ZEN2, Q8K4T8
M0R590	333	0	35773.1	6	11	0.000294096	0.2042	33.0367	Glyceraldehyde-3-phosphate dehydrogenase OS=Rattus norvegicus OX=10116 GN=LOC108351137 PE=3 SV=1; Additional IDs concatenated into MaxParsimony group: P04797, D3ZGY4, M0R660, E9PTN6, Q0QEU1, E9PTV9, P97617, Q498M9, A0A0G2K8S2, F1M4G6, F1M2N4, D3ZEN2, Q8K4T8
Q63515	258	0	28604.8	3	16	0.000552129	0.1085	32.3765	C4b-binding protein beta chain OS=Rattus norvegicus OX=10116 GN=C4bpb PE=2 SV=1
A0A5C5	258	0	28588.8	3	16	0.000552129	0.1085	32.3765	C4b-binding protein beta chain OS=Rattus norvegicus OX=10116 GN=C4bpb PE=1 SV=1; Additional IDs concatenated into MaxParsimony group: Q63515; Additional IDs concatenated into MaxParsimony group: Q63515
F1LSB2	497	1	57361.2	5	13	0.000232877	0.0905	32.3434	Angiopoietin 1, isoform CRA_a OS=Rattus norvegicus OX=10116 GN=Angpt1 PE=4 SV=2; Additional IDs concatenated into MaxParsimony group: O35460, Q548N6, Q91Z91; Additional IDs concatenated into MaxParsimony group: O35460, Q548N6, Q91Z91
F1M581	535	0	60820.8	4	14	0.000232978	0.0804	31.7528	Heparanase OS=Rattus norvegicus OX=10116 GN=Hpse PE=4 SV=3
P23562	927	0	103089	4	12	0.00011525	0.0529	31.5306	Band 3 anion transport protein OS=Rattus norvegicus OX=10116 GN=Slc4a1 PE=1 SV=3
F8WFT7	928	0	103160	4	12	0.000115126	0.0528	31.5306	Anion exchange protein OS=Rattus norvegicus OX=10116 GN=Slc4a1 PE=1 SV=1
Q5U329	850	0	94276.9	4	12	0.00012569	0.0576	31.5306	Anion exchange protein OS=Rattus norvegicus OX=10116 GN=Slc4a1 PE=1 SV=1
D3ZGY4	333	0	35782.1	5	10	0.00026736	0.1802	31.2918	Glyceraldehyde-3-phosphate dehydrogenase OS=Rattus norvegicus OX=10116 PE=1 SV=1
M0R660	333	0	35742.1	5	10	0.00026736	0.1622	31.1461	Glyceraldehyde-3-phosphate dehydrogenase OS=Rattus norvegicus OX=10116 PE=1 SV=1
F1LXY6	100	3	11221.5	3	15	0.00133546	0.36	30.9794	Ig-like domain-containing protein OS=Rattus norvegicus OX=10116 PE=1 SV=2
M0RDZ5	95	0	10414.2	2	12	0.0011246	0.2105	28.6535	Ig-like domain-containing protein OS=Rattus norvegicus OX=10116 PE=4 SV=1
A0A0G2K3S3	132	0	14797.5	2	12	0.000809371	0.1515	28.6535	Ig-like domain-containing protein OS=Rattus norvegicus OX=10116 PE=4 SV=1; Additional IDs concatenated into MaxParsimony group: D3ZIL8, M0RDL2, M0RC23, F1M7B3, M0RDZ5, A0A0G2JWX0, A0A0G2K9W1, D4A3L8, F1M6G9, M0RD98, M0RAV0
F1M7B3	102	0	11171.7	2	12	0.00104742	0.1961	28.6535	Ig-like domain-containing protein OS=Rattus norvegicus OX=10116 PE=4 SV=2
M0RDL2	102	0	11241.6	2	12	0.00104742	0.1961	28.6535	Ig-like domain-containing protein OS=Rattus norvegicus OX=10116 PE=4 SV=2
M0RC23	102	0	11169.5	2	12	0.00104742	0.1961	28.6535	Ig-like domain-containing protein OS=Rattus norvegicus OX=10116 PE=1 SV=1
D3ZIL8	115	0	12628.2	2	12	0.000929017	0.1739	28.6535	Ig-like domain-containing protein OS=Rattus norvegicus OX=10116 PE=4 SV=2
M0R485	435	2	47053.2	5	11	0.000225135	0.1793	28.4913	Peptidoglycan recognition protein 2 OS=Rattus norvegicus OX=10116 GN=Pglyrp2 PE=1 SV=2
Q63282	26	0	3087.5	1	10	0.00342426	0.3846	28.4837	Keratin K6 (Fragment) OS=Rattus norvegicus OX=10116 GN=keratin K6 PE=4 SV=1
Q6P6T1	688	1	77003.8	4	11	0.000142346	0.0858	28.0672	Complement C1s subcomponent OS=Rattus norvegicus OX=10116 GN=C1s PE=2 SV=2; Additional IDs concatenated into MaxParsimony group: G3V7L3, D4A1S0; Additional IDs concatenated into MaxParsimony group: G3V7L3, D4A1S0
Q9JLX9	97	0	10988.4	2	9	0.000826059	0.299	26.9831	Beta actin (Fragment) OS=Rattus norvegicus OX=10116 PE=2 SV=1
Q99NC6	134	0	14955.4	3	12	0.00079729	0.2687	26.7647	Beta-actin FE-3 (Fragment) OS=Rattus norvegicus OX=10116 PE=2 SV=1
Q4G047	437	0	50940.1	6	12	0.000244478	0.1556	26.6769	Apob protein (Fragment) OS=Rattus norvegicus OX=10116 GN=Apob PE=2 SV=1
Q71DI1	110	2	11258.8	2	10	0.000809371	0.2	26.6672	Dermcidin OS=Rattus norvegicus OX=10116 PE=2 SV=1
Q5I0H8	333	1	36634.8	4	11	0.000294096	0.1441	26.6278	LOC299567 protein (Fragment) OS=Rattus norvegicus OX=10116 GN=LOC299567 PE=2 SV=1
A0A0G2K9Z5	118	0	13006.5	1	9	0.000679048	0.0932	26.5311	Ig-like domain-containing protein OS=Rattus norvegicus OX=10116 PE=4 SV=1
Q62970	576	0	66702.5	4	9	0.000139111	0.0833	26.3881	Apolipoprotein B (Fragment) OS=Rattus norvegicus OX=10116 GN=apoB PE=4 SV=1
Q0QEU1	238	0	25501.2	3	7	0.000261855	0.1597	25.1181	Glyceraldehyde-3-phosphate dehydrogenase (Fragment) OS=Rattus norvegicus OX=10116 GN=GAPDH PE=2 SV=1
Q6IFW5	456	0	48772	1	11	0.000214767	0.0197	24.8563	Keratin, type I cytoskeletal 12 OS=Rattus norvegicus OX=10116 GN=Krt12 PE=3 SV=1
A0A0G2K4H9	483	0	52009.5	1	11	0.000202762	0.0186	24.8563	Keratin, type I cytoskeletal 12 OS=Rattus norvegicus OX=10116 GN=Krt12 PE=3 SV=1
M0R7M5	132	1	14621.5	2	8	0.00053958	0.2197	24.8453	Ig-like domain-containing protein OS=Rattus norvegicus OX=10116 PE=1 SV=2; Additional IDs concatenated into MaxParsimony group: D3ZIL8, F1M7B3, M0RDL2, M0RC23, M0RDZ5, A0A0G2JWX0, F1M6G9, D4A3L8, A0A0G2K9W1, M0RD98, M0RAV0
A0A0G2KAH2	1237	0	138062	5	9	6.47758e-05	0.0622	24.7011	Peroxidasin OS=Rattus norvegicus OX=10116 GN=Pxdn PE=4 SV=1
A0A0G2JWB6	1475	0	165311	5	9	5.43239e-05	0.0522	24.7011	Peroxidasin OS=Rattus norvegicus OX=10116 GN=Pxdn PE=4 SV=1; Additional IDs concatenated into MaxParsimony group: A0A0G2KAH2; Additional IDs concatenated into MaxParsimony group: A0A0G2KAH2
F1LWD0	106	2	11894.9	2	8	0.00067193	0.2358	24.6422	Ig-like domain-containing protein OS=Rattus norvegicus OX=10116 PE=1 SV=2
D3ZRN3	376	0	41917.9	3	12	0.000284141	0.0824	24.5186	Actin, beta-like 2 OS=Rattus norvegicus OX=10116 GN=Actbl2 PE=1 SV=1
A0A0G2K7P6	94	1	10205	2	9	0.000852422	0.234	23.9254	IGv domain-containing protein OS=Rattus norvegicus OX=10116 PE=4 SV=1
F1M1Q7	134	0	14550.2	2	9	0.000597968	0.1791	23.8864	Ig-like domain-containing protein OS=Rattus norvegicus OX=10116 PE=4 SV=3
A0A0G2JWF2	95	0	10277	2	9	0.000843449	0.2526	23.8864	Ig-like domain-containing protein OS=Rattus norvegicus OX=10116 PE=4 SV=1
A0A0G2JTG4	94	0	10227.2	2	9	0.000852422	0.2553	23.8864	Ig-like domain-containing protein OS=Rattus norvegicus OX=10116 PE=4 SV=1
F1M195	96	0	10441.2	2	9	0.000834663	0.25	23.8864	Ig-like domain-containing protein OS=Rattus norvegicus OX=10116 PE=4 SV=3
H6X321	228	0	26042	4	11	0.000429534	0.2149	23.7948	Pentaxin OS=Rattus norvegicus OX=10116 GN=sap PE=3 SV=1
H6X319	228	0	26069.1	4	11	0.000429534	0.2149	23.7948	Pentaxin OS=Rattus norvegicus OX=10116 GN=sap PE=3 SV=1
A0A0H2UHH2	275	0	31581	4	11	0.000356123	0.1782	23.7948	Serum amyloid P-component OS=Rattus norvegicus OX=10116 GN=Apcs PE=1 SV=1; Additional IDs concatenated into MaxParsimony group: H6X321, H6X319, H6X320, H6X338, P23680, H6X332, H6X331, H6X324; Additional IDs concatenated into MaxParsimony group: P23680, H6X338, H6X320, H6X319, H6X321, H6X331, H6X324, H6X332
H6X320	228	0	26141.1	4	11	0.000429534	0.2149	23.7948	Pentaxin OS=Rattus norvegicus OX=10116 GN=Apcs PE=3 SV=1
H6X338	228	0	26169.1	4	11	0.000429534	0.2149	23.7948	Pentaxin OS=Rattus norvegicus OX=10116 GN=sap PE=3 SV=1
P23680	228	0	26141.1	4	11	0.000429534	0.2149	23.7948	Serum amyloid P-component OS=Rattus norvegicus OX=10116 GN=Apcs PE=2 SV=2
Q5BJY9	423	0	47714.3	2	13	0.000273617	0.0331	23.6048	Keratin, type I cytoskeletal 18 OS=Rattus norvegicus OX=10116 GN=Krt18 PE=1 SV=3
F1LMS5	959	0	105751	2	14	0.000129972	0.0073	23.4915	Thrombospondin-4 OS=Rattus norvegicus OX=10116 GN=Thbs4 PE=4 SV=1
A0A0G2K7L8	961	0	105963	2	14	0.000129701	0.0073	23.4915	Thrombospondin-4 OS=Rattus norvegicus OX=10116 GN=Thbs4 PE=4 SV=1
M0RBU0	755	0	82482.6	2	14	0.00016509	0.0093	23.4915	Cartilage oligomeric matrix protein OS=Rattus norvegicus OX=10116 GN=Comp PE=4 SV=1
P49744	980	0	108127	2	14	0.000127187	0.0071	23.4915	Thrombospondin-4 OS=Rattus norvegicus OX=10116 GN=Thbs4 PE=1 SV=1
P35444	755	0	82592.7	2	14	0.00016509	0.0093	23.4915	Cartilage oligomeric matrix protein OS=Rattus norvegicus OX=10116 GN=Comp PE=1 SV=1
A0A0G2JZH3	955	0	104048	2	14	0.000130516	0.0073	23.4915	Thrombospondin 3 OS=Rattus norvegicus OX=10116 GN=Thbs3 PE=4 SV=1
A0A0G2JXN9	109	0	12767.3	2	14	0.00114351	0.0642	23.4915	Cartilage oligomeric matrix protein (Fragment) OS=Rattus norvegicus OX=10116 GN=Comp PE=4 SV=2
Q64721	127	0	14733.7	2	10	0.00070103	0.2283	22.792	Apolipoprotein BL (Fragment) OS=Rattus norvegicus OX=10116 GN=apo B PE=2 SV=1
O35460	497	0	57406.1	3	10	0.000179136	0.0624	22.6137	Angiopoietin-1 OS=Rattus norvegicus OX=10116 GN=Angpt1 PE=2 SV=2
Q6IFX0	446	0	48895.2	2	11	0.000219583	0.0202	22.3251	Keratin, type I cytoskeletal 25 OS=Rattus norvegicus OX=10116 GN=Krt25 PE=3 SV=1
Q6IFW8	449	0	49060.3	2	11	0.000218115	0.02	22.3251	Keratin, type I cytoskeletal 27 OS=Rattus norvegicus OX=10116 GN=Krt27 PE=3 SV=1
A0A221LEF7	474	0	51935.7	2	11	0.000206611	0.019	22.3251	Keratin 25 OS=Rattus norvegicus OX=10116 GN=krt25 PE=2 SV=1
A0A0G2KB42	295	0	34134.4	2	7	0.000211259	0.0915	22.0586	Clusterin OS=Rattus norvegicus OX=10116 GN=Clu PE=1 SV=1
O35510	295	0	34075.3	2	7	0.000211259	0.0915	22.0586	Clusterin OS=Rattus norvegicus OX=10116 PE=2 SV=1
M0RAZ1	102	0	11081.5	2	8	0.000698281	0.2353	22.0448	Ig-like domain-containing protein OS=Rattus norvegicus OX=10116 PE=4 SV=2
A0A0G2K5D2	126	0	13525.9	2	8	0.000565275	0.1905	22.0448	Ig-like domain-containing protein OS=Rattus norvegicus OX=10116 PE=1 SV=1; Additional IDs concatenated into MaxParsimony group: M0RAZ1, D4ADL1, D3ZBB2, A0A0G2K9L1; Additional IDs concatenated into MaxParsimony group: M0RAZ1, D3ZBB2, D4ADL1, A0A0G2K9L1
P15999	553	0	59698.6	1	8	0.000128797	0.0235	21.3634	ATP synthase subunit alpha, mitochondrial OS=Rattus norvegicus OX=10116 GN=Atp5f1a PE=1 SV=2; Additional IDs concatenated into MaxParsimony group: F1LP05
F1LP05	553	0	59757.7	1	8	0.000128797	0.0235	21.3634	ATP synthase subunit alpha OS=Rattus norvegicus OX=10116 GN=Atp5f1a PE=1 SV=1; Additional IDs concatenated into MaxParsimony group: P15999
O88752	147	0	16076.5	1	10	0.000605651	0.068	20.9241	Epsilon 1 globin OS=Rattus norvegicus OX=10116 GN=Hbe1 PE=1 SV=1
H6X324	228	0	26099	3	10	0.000390486	0.1491	20.4198	Pentaxin OS=Rattus norvegicus OX=10116 GN=sap PE=3 SV=1
H6X331	228	0	26126	3	10	0.000390486	0.1491	20.4198	Pentaxin OS=Rattus norvegicus OX=10116 GN=sap PE=3 SV=1
H6X332	228	0	26050	3	10	0.000390486	0.1491	20.4198	Pentaxin OS=Rattus norvegicus OX=10116 GN=sap PE=3 SV=1
M0RDF2	99	0	11158.4	2	8	0.000719441	0.2525	20.3212	Ig-like domain-containing protein OS=Rattus norvegicus OX=10116 PE=1 SV=1
P01805	142	0	15995.9	2	8	0.000501582	0.1761	20.3212	Ig heavy chain V region IR2 OS=Rattus norvegicus OX=10116 PE=4 SV=1; Additional IDs concatenated into MaxParsimony group: M0RDF2, F1M3H2; Additional IDs concatenated into MaxParsimony group: M0RDF2, F1M3H2
G3V7L3	694	0	77645.1	3	8	0.000102629	0.062	20.3182	Complement C1s subcomponent OS=Rattus norvegicus OX=10116 GN=C1s PE=1 SV=1
G3V8Z5	129	0	14255.8	4	9	0.000621145	0.3488	19.533	Ig-like domain-containing protein OS=Rattus norvegicus OX=10116 PE=1 SV=2; Additional IDs concatenated into MaxParsimony group: A0N4E8, A2NB82, M0R936, E9PSU8, D3ZE07, B2RYW6; Additional IDs concatenated into MaxParsimony group: A0N4E8, A2NB82, M0R936, E9PSU8, D3ZE07, B2RYW6
A0N4E8	126	0	13909.7	4	9	0.000635934	0.3571	19.533	Productively rearranged V-lambda-2 (Fragment) OS=Rattus norvegicus OX=10116 PE=2 SV=1
G3V9R2	1235	0	140121	4	9	6.48807e-05	0.0324	19.3459	Complement factor H OS=Rattus norvegicus OX=10116 GN=Cfh PE=1 SV=1
Q91YB6	1236	0	140234	4	9	6.48282e-05	0.0324	19.3459	Complement inhibitory factor H OS=Rattus norvegicus OX=10116 GN=Cfh PE=2 SV=1; Additional IDs concatenated into MaxParsimony group: G3V9R2, F1M983, Q5XJW6, Q5FVP9; Additional IDs concatenated into MaxParsimony group: G3V9R2, F1M983, Q5XJW6, Q5FVP9
F1M983	1234	0	139898	4	9	6.49333e-05	0.0324	19.3459	Complement factor H OS=Rattus norvegicus OX=10116 GN=Cfh PE=1 SV=1
D3ZBB2	120	0	13118.6	1	7	0.000519346	0.1083	19.3039	Ig-like domain-containing protein OS=Rattus norvegicus OX=10116 PE=1 SV=3
D4ADL1	120	0	12888.4	1	7	0.000519346	0.1083	19.3039	Ig-like domain-containing protein OS=Rattus norvegicus OX=10116 PE=4 SV=3
A0A0G2K9L1	115	0	12436.4	1	7	0.000541926	0.113	19.3039	Uncharacterized protein OS=Rattus norvegicus OX=10116 PE=4 SV=1
A0A1B0GWQ4	291	0	33440	4	8	0.000244758	0.1684	19.0783	Complement C5 (Fragment) OS=Rattus norvegicus OX=10116 GN=C5 PE=1 SV=1
M0RD98	122	0	13096.7	1	6	0.000437856	0.1066	18.9122	Ig-like domain-containing protein OS=Rattus norvegicus OX=10116 PE=4 SV=2
M0RAV0	93	0	10104.9	1	6	0.000574392	0.1398	18.9122	Ig-like domain-containing protein OS=Rattus norvegicus OX=10116 PE=4 SV=1
F1MAF7	414	0	46789.7	1	10	0.00021505	0.0169	18.8079	Keratin 31 OS=Rattus norvegicus OX=10116 GN=Krt31 PE=3 SV=2
Q6IFW2	431	0	48246.6	1	10	0.000206568	0.0162	18.8079	Keratin, type I cytoskeletal 40 OS=Rattus norvegicus OX=10116 GN=Krt40 PE=3 SV=1
A0A096MJE0	416	0	47381.9	1	10	0.000214016	0.0168	18.8079	Keratin 32 (Fragment) OS=Rattus norvegicus OX=10116 GN=Krt32 PE=3 SV=1
Q6IFW0	404	0	45788.2	1	10	0.000220373	0.0173	18.8079	RCG32608 OS=Rattus norvegicus OX=10116 GN=Krt33b PE=2 SV=1
Q6IFW7	383	0	41281.6	1	10	0.000232456	0.0183	18.8079	Keratin 28 OS=Rattus norvegicus OX=10116 GN=Krt28 PE=2 SV=1
Q6IFV8	414	0	46693.6	1	10	0.00021505	0.0169	18.8079	Type I hair keratin KA25 OS=Rattus norvegicus OX=10116 GN=Krt31 PE=2 SV=1
F1MAS0	455	0	51479.7	1	10	0.000195672	0.0154	18.8079	Keratin 32 OS=Rattus norvegicus OX=10116 GN=Krt32 PE=3 SV=2
Q6IFV5	468	0	52202.8	1	10	0.000190237	0.015	18.8079	Keratin 36 OS=Rattus norvegicus OX=10116 GN=Krt36 PE=2 SV=1
Q6IFX1	491	0	52329.2	1	10	0.000181325	0.0143	18.8079	Keratin, type I cytoskeletal 24 OS=Rattus norvegicus OX=10116 GN=Krt24 PE=3 SV=1
Q6IFV7	455	0	51493.8	1	10	0.000195672	0.0154	18.8079	Keratin 32 OS=Rattus norvegicus OX=10116 GN=Krt32 PE=2 SV=1
contaminant_KERATIN09	429	0	47879.5	1	10	0.000207531	0.0163	18.8079
Q6IFV6	455	0	50624.6	1	10	0.000195672	0.0154	18.8079	Keratin 35 OS=Rattus norvegicus OX=10116 GN=Krt35 PE=2 SV=1
A0A0G2JXB7	116	1	12863.4	2	7	0.000537255	0.1983	18.558	Ig-like domain-containing protein OS=Rattus norvegicus OX=10116 PE=1 SV=1
G3V8R3	142	0	16049.2	2	8	0.000501582	0.0634	17.6054	Globin e1 OS=Rattus norvegicus OX=10116 GN=Hbz PE=3 SV=1
Q63910	142	0	15497	2	8	0.000501582	0.0634	17.6054	Alpha globin OS=Rattus norvegicus OX=10116 GN=Hba-a3 PE=1 SV=2
Q5XJW6	689	0	78609.9	3	8	0.000103374	0.0421	17.5046	Cfh protein OS=Rattus norvegicus OX=10116 GN=Cfh PE=1 SV=1
F8SQR6	117	0	13095.2	2	8	0.000608757	0.094	17.4047	Immunglobulin heavy chain variable region (Fragment) OS=Rattus norvegicus OX=10116 PE=2 SV=1
M0R816	97	0	10614	1	6	0.000550706	0.134	17.3112	Ig-like domain-containing protein OS=Rattus norvegicus OX=10116 PE=1 SV=2
F1LZY6	97	0	10458.1	1	6	0.000550706	0.134	17.3112	Ig-like domain-containing protein OS=Rattus norvegicus OX=10116 PE=1 SV=2
M0R4Z4	118	1	13259.4	3	8	0.000603598	0.161	17.3057	Ig-like domain-containing protein OS=Rattus norvegicus OX=10116 PE=1 SV=2
M0R547	88	0	9672.3	2	10	0.00101171	0.1818	17.0596	Apolipoprotein C-I-like OS=Rattus norvegicus OX=10116 GN=LOC100910181 PE=4 SV=1
D4A1S0	679	0	76011.8	2	7	9.17843e-05	0.0295	16.3715	Complement C1s subcomponent OS=Rattus norvegicus OX=10116 GN=C1s PE=1 SV=3
M0R9U2	98	1	10820.4	2	8	0.000726782	0.2347	15.7922	Ig-like domain-containing protein OS=Rattus norvegicus OX=10116 PE=1 SV=1
Q6LC76	190	0	20510.4	1	4	0.000187433	0.1	15.0657	Fibronectin (Fragment) OS=Rattus norvegicus OX=10116 GN=fn-1 PE=4 SV=1
A0A0G2JZL1	133	2	14922.5	2	6	0.000401643	0.0677	15.0172	Ig-like domain-containing protein OS=Rattus norvegicus OX=10116 PE=4 SV=1
B1H247	543	0	60274	3	8	0.000131169	0.0847	14.9086	Uncharacterized protein (Fragment) OS=Rattus norvegicus OX=10116 PE=2 SV=1
F1LQT4	565	0	62582.2	3	8	0.000126061	0.0814	14.9086	Carboxypeptidase N subunit 2 OS=Rattus norvegicus OX=10116 GN=Cpn2 PE=1 SV=1; Additional IDs concatenated into MaxParsimony group: B1H247; Additional IDs concatenated into MaxParsimony group: B1H247
Q5FVP9	393	0	45258.5	2	7	0.000158579	0.0433	14.8732	Cfh protein OS=Rattus norvegicus OX=10116 GN=LOC100361907 PE=2 SV=1
A0A0G2K4K2	96	0	10382.9	2	8	0.000741923	0.1667	14.1005	Ig-like domain-containing protein OS=Rattus norvegicus OX=10116 PE=1 SV=1; Additional IDs concatenated into MaxParsimony group: F1LVL4, M0RBP7, A0A0G2JT70; Additional IDs concatenated into MaxParsimony group: F1LVL4, M0RBP7, A0A0G2JT70
A2NB82	111	0	12168.8	2	6	0.000481247	0.1712	13.9346	Productively rearranged V-lambda-2 (Fragment) OS=Rattus norvegicus OX=10116 PE=2 SV=1
D0VYQ0	270	0	29597.5	1	7	0.000230821	0.0296	13.8029	DLST protein OS=Rattus norvegicus OX=10116 GN=DLST PE=2 SV=1
G3V6P2	454	0	48850.3	1	7	0.000137272	0.0176	13.8029	Dihydrolipoamide S-succinyltransferase (E2 component of 2-oxo-glutarate complex), isoform CRA_a OS=Rattus norvegicus OX=10116 GN=Dlst PE=1 SV=1; Additional IDs concatenated into MaxParsimony group: Q01205, Q8CJG5, D0VYQ0; Additional IDs concatenated into MaxParsimony group: Q01205, Q8CJG5, D0VYQ0
Q01205	454	0	48876.3	1	7	0.000137272	0.0176	13.8029	Dihydrolipoyllysine-residue succinyltransferase component of 2-oxoglutarate dehydrogenase complex, mitochondrial OS=Rattus norvegicus OX=10116 GN=Dlst PE=1 SV=2
Q8CJG5	454	0	48564.2	1	7	0.000137272	0.0176	13.8029	Gene OS=Rattus norvegicus OX=10116 PE=4 SV=1
P02767	147	3	15691.9	3	6	0.000363391	0.2585	13.4803	Transthyretin OS=Rattus norvegicus OX=10116 GN=Ttr PE=1 SV=1
G3V8D4	97	2	10670.3	2	5	0.000458921	0.3093	13.2868	Apolipoprotein C-II (Predicted) OS=Rattus norvegicus OX=10116 GN=Apoc2 PE=1 SV=1
Q9EQV9	422	3	48777.5	3	8	0.000168779	0.0521	12.8408	Carboxypeptidase B2 OS=Rattus norvegicus OX=10116 GN=Cpb2 PE=2 SV=1
G3V6G1	159	2	17754.7	2	6	0.000335965	0.1447	12.5114	Immunoglobulin joining chain OS=Rattus norvegicus OX=10116 GN=Jchain PE=1 SV=1
D3ZPF9	421	0	47482.5	1	6	0.000126885	0.0238	12.1164	Serpin family B member 12 OS=Rattus norvegicus OX=10116 GN=Serpinb12 PE=3 SV=1
Q6IE44	326	0	37324.1	1	6	0.00016386	0.0307	12.1164	Serine protease inhibitor B3 OS=Rattus norvegicus OX=10116 GN=Serpinb3 PE=2 SV=1
F1MAA9	326	0	37368.2	1	6	0.00016386	0.0307	12.1164	Serpin family B member 3 OS=Rattus norvegicus OX=10116 GN=Serpinb3 PE=3 SV=2
D3ZJK2	387	0	44387.1	1	6	0.000138032	0.0258	12.1164	Serine (or cysteine) peptidase inhibitor, clade B (ovalbumin), member 3A OS=Rattus norvegicus OX=10116 GN=Serpinb3a PE=3 SV=1
A0A0G2JX40	143	0	16046.2	3	4	0.000249037	0.3427	12.0244	Insulin-like growth factor I OS=Rattus norvegicus OX=10116 GN=Igf1 PE=1 SV=1
P08025	153	0	17049.6	3	4	0.00023276	0.3203	12.0244	Insulin-like growth factor I OS=Rattus norvegicus OX=10116 GN=Igf1 PE=1 SV=3
F8WFZ5	159	0	17929.3	3	4	0.000223977	0.3082	12.0244	Insulin-like growth factor 1, isoform CRA_b OS=Rattus norvegicus OX=10116 GN=Igf1 PE=1 SV=2; Additional IDs concatenated into MaxParsimony group: P08025, A0A0G2JX40, Q5RK13; Additional IDs concatenated into MaxParsimony group: P08025, A0A0G2JX40, Q5RK13
Q5RK13	127	0	14079	3	4	0.000280412	0.3858	12.0244	Igf1 protein OS=Rattus norvegicus OX=10116 GN=Igf1 PE=2 SV=2
D3ZJF8	2584	1	274962	1	7	2.41182e-05	0.0035	11.7401	Fc fragment of IgG-binding protein OS=Rattus norvegicus OX=10116 GN=Fcgbp PE=1 SV=3
Q9JMK6	59	0	6454.2	1	4	0.000603598	0.1864	11.5392	TED_complement domain-containing protein (Fragment) OS=Rattus norvegicus OX=10116 PE=2 SV=1
Q5FX35	507	0	56173.6	1	4	7.02412e-05	0.0217	11.5392	Alpha 2 macroglobulin cardiac isoform (Fragment) OS=Rattus norvegicus OX=10116 PE=2 SV=1
P06238	1472	0	163664	1	4	2.41931e-05	0.0075	11.5392	Alpha-2-macroglobulin OS=Rattus norvegicus OX=10116 GN=A2m PE=2 SV=2
Q6LE95	56	0	5992	1	6	0.000953901	0.1429	11.4261	Kininogen OS=Rattus norvegicus OX=10116 PE=4 SV=1
Q6IG04	520	0	56797.9	1	5	8.56065e-05	0.0173	11.3422	Keratin, type II cytoskeletal 72 OS=Rattus norvegicus OX=10116 GN=Krt72 PE=3 SV=2
A0A0G2K7N1	553	0	60379.6	1	5	8.0498e-05	0.0163	11.3422	Keratin, type II cytoskeletal 72 OS=Rattus norvegicus OX=10116 GN=Krt72 PE=3 SV=1
D3ZMS7	115	1	12695.3	1	4	0.000309672	0.0957	11.1802	Ig-like domain-containing protein OS=Rattus norvegicus OX=10116 PE=1 SV=3
E9PSU8	137	0	15134.2	1	4	0.000259944	0.0803	11.004	Ig-like domain-containing protein OS=Rattus norvegicus OX=10116 PE=1 SV=3
M0R936	140	0	15409.2	1	4	0.000254374	0.0786	11.004	Ig-like domain-containing protein OS=Rattus norvegicus OX=10116 PE=4 SV=2
B2RYW6	129	0	14381.9	1	4	0.000276064	0.0853	11.004	Ig-like domain-containing protein OS=Rattus norvegicus OX=10116 PE=2 SV=1
D3ZE07	131	0	14588	1	4	0.00027185	0.084	11.004	Ig-like domain-containing protein OS=Rattus norvegicus OX=10116 PE=4 SV=3
M0RBP7	118	0	12758.1	1	6	0.000452699	0.0678	10.8061	Ig-like domain-containing protein OS=Rattus norvegicus OX=10116 PE=4 SV=1
Q699Y0	486	0	50980.7	1	4	7.32764e-05	0.0247	10.7906	60 kDa chaperonin (Fragment) OS=Bartonella rattimassiliensis OX=270250 PE=3 SV=1; Additional IDs concatenated into MaxParsimony group: Q699Y1; Additional IDs concatenated into MaxParsimony group: Q699Y1
Q699Y1	482	0	50620.6	1	4	7.38845e-05	0.0249	10.7906	60 kDa chaperonin (Fragment) OS=Bartonella rattimassiliensis OX=270250 PE=3 SV=1
B2RZ58	222	0	25390.3	1	5	0.00020052	0.0495	10.6008	Derlin (Fragment) OS=Rattus norvegicus OX=10116 GN=Derl3 PE=2 SV=1
A0A0G2JTX9	239	0	27603.3	1	5	0.000186257	0.046	10.6008	Derlin OS=Rattus norvegicus OX=10116 GN=Derl2 PE=1 SV=1; Additional IDs concatenated into MaxParsimony group: G3V8X2, B2RZ58; Additional IDs concatenated into MaxParsimony group: G3V8X2, B2RZ58
G3V8X2	228	0	26046.6	1	5	0.000195243	0.0482	10.6008	Derlin OS=Rattus norvegicus OX=10116 GN=Derl3 PE=3 SV=1
M0RBX3	117	0	13019.4	1	6	0.000456568	0.0598	10.1944	Ig-like domain-containing protein OS=Rattus norvegicus OX=10116 PE=4 SV=2; Additional IDs concatenated into MaxParsimony group: D3ZFF8
D3ZFF8	117	0	12958.4	1	6	0.000456568	0.0598	10.1944	Ig-like domain-containing protein OS=Rattus norvegicus OX=10116 PE=1 SV=2; Additional IDs concatenated into MaxParsimony group: M0RBX3
Q6PDV1	148	0	16701.3	1	3	0.000180468	0.0811	9.9866	Lysozyme OS=Rattus norvegicus OX=10116 GN=Lyz2 PE=2 SV=1
F1M8E9	148	0	16689.2	1	3	0.000180468	0.0811	9.9866	Lysozyme OS=Rattus norvegicus OX=10116 GN=Lyz2 PE=1 SV=1
A0A0G2K5X1	150	0	16789.3	1	3	0.000178062	0.08	9.9866	Lysozyme OS=Rattus norvegicus OX=10116 GN=Lyc2 PE=3 SV=1
B2RYD4	155	0	17064.1	1	3	0.000172318	0.0774	9.9866	Lysozyme OS=Rattus norvegicus OX=10116 GN=Lyc2 PE=2 SV=1; Additional IDs concatenated into MaxParsimony group: A0A0G2K5X1, Q6PDV1, F1M8E9, Q05820, P00697; Additional IDs concatenated into MaxParsimony group: A0A0G2K5X1, P00697, F1M8E9, Q6PDV1, Q05820
P00697	148	0	16700.3	1	3	0.000180468	0.0811	9.9866	Lysozyme C-1 OS=Rattus norvegicus OX=10116 GN=Lyz1 PE=1 SV=2
Q05820	148	0	16589.2	1	3	0.000180468	0.0811	9.9866	Putative lysozyme C-2 OS=Rattus norvegicus OX=10116 GN=Lyz2 PE=5 SV=1
F1LYU4	124	0	13355.8	1	4	0.000287196	0.0887	9.815	Ig-like domain-containing protein OS=Rattus norvegicus OX=10116 PE=4 SV=3; Additional IDs concatenated into MaxParsimony group: A0A0G2JZV7, F1LUS1; Additional IDs concatenated into MaxParsimony group: A0A0G2JZV7, F1LUS1
F1LUS1	110	0	11914.1	1	4	0.000323748	0.1	9.815	Ig-like domain-containing protein OS=Rattus norvegicus OX=10116 PE=1 SV=2
A0A0G2JZV7	111	0	12129.2	1	4	0.000320832	0.0991	9.815	Ig-like domain-containing protein OS=Rattus norvegicus OX=10116 PE=1 SV=1
Q5M878	130	0	14945.4	2	4	0.000273941	0.1462	9.7739	Serum amyloid A protein OS=Rattus norvegicus OX=10116 GN=Saa4 PE=1 SV=1
Q7TMC3	830	0	92763.7	2	4	4.29064e-05	0.0229	9.7739	Hermansky-Pudlak syndrome 5 protein homolog OS=Rattus norvegicus OX=10116 GN=Saa4 PE=1 SV=1; Additional IDs concatenated into MaxParsimony group: Q5M878; Additional IDs concatenated into MaxParsimony group: Q5M878
A0A0G2K9W1	132	0	14639.4	1	6	0.000404685	0.053	9.7413	Ig-like domain-containing protein OS=Rattus norvegicus OX=10116 PE=4 SV=1
A0A0G2JWX0	141	0	15477.8	1	6	0.000378854	0.0496	9.7413	Ig-like domain-containing protein OS=Rattus norvegicus OX=10116 PE=1 SV=1
D4A3L8	132	0	14665.5	1	6	0.000404685	0.053	9.7413	Ig-like domain-containing protein OS=Rattus norvegicus OX=10116 PE=4 SV=2
F1M6G9	132	0	14636.4	1	6	0.000404685	0.053	9.7413	Ig-like domain-containing protein OS=Rattus norvegicus OX=10116 PE=4 SV=2
F1M3H2	99	0	11163.3	1	4	0.00035972	0.0909	9.6395	Ig-like domain-containing protein OS=Rattus norvegicus OX=10116 PE=4 SV=2
F1M8K5	258	0	28342.5	1	4	0.000138032	0.0388	9.4488	Granzyme K OS=Rattus norvegicus OX=10116 GN=Gzmk PE=3 SV=2
P49864	258	0	28428.6	1	4	0.000138032	0.0388	9.4488	Granzyme K OS=Rattus norvegicus OX=10116 GN=Gzmk PE=1 SV=1; Additional IDs concatenated into MaxParsimony group: F1M8K5; Additional IDs concatenated into MaxParsimony group: F1M8K5
Q63030	35	0	3521.6	1	4	0.00101749	0.2857	9.032	Rat alpha-smooth muscle actin mRNA (Fragment) OS=Rattus norvegicus OX=10116 PE=2 SV=1
D3ZEP2	131	1	14672	1	5	0.000339812	0.1069	9.0016	Norrie disease homolog (Human) (Predicted), isoform CRA_a OS=Rattus norvegicus OX=10116 GN=LOC100909913 PE=4 SV=1
F1M4R1	115	2	13124.6	2	3	0.000232254	0.1652	8.988	Ig-like domain-containing protein OS=Rattus norvegicus OX=10116 PE=4 SV=1
B2RYJ5	539	0	59205.6	1	4	6.60711e-05	0.0148	8.7183	Tmprss13 protein OS=Rattus norvegicus OX=10116 GN=Tmprss13 PE=2 SV=1; Additional IDs concatenated into MaxParsimony group: contaminant_TRYPSIN; Additional IDs concatenated into MaxParsimony group: contaminant_TRYPSIN
contaminant_TRYPSIN	229	0	23959.6	1	4	0.000155512	0.0349	8.7183
D4A4L6	117	0	12942.4	1	4	0.000304379	0.1282	8.6974	Ig-like domain-containing protein OS=Rattus norvegicus OX=10116 PE=1 SV=1; Additional IDs concatenated into MaxParsimony group: D3ZQM9; Additional IDs concatenated into MaxParsimony group: D3ZQM9
D3ZQM9	116	0	12914.4	1	4	0.000307003	0.1293	8.6974	Ig-like domain-containing protein OS=Rattus norvegicus OX=10116 PE=1 SV=2
A0A0G2JT52	188	0	21681.6	1	5	0.000236784	0.0426	8.6617	Complement C4A (Fragment) OS=Rattus norvegicus OX=10116 GN=C4a PE=4 SV=1
F1LWW1	113	1	12339.1	1	4	0.000315153	0.1327	8.6111	Ig-like domain-containing protein OS=Rattus norvegicus OX=10116 PE=1 SV=3
Q91Z91	89	0	10194.4	1	2	0.000200069	0.1573	8.5173	Angiopoietin 1 (Fragment) OS=Rattus norvegicus OX=10116 PE=2 SV=1
Q548N6	110	0	12833.7	1	2	0.000161874	0.1273	8.5173	Angiopoietin-1 (Fragment) OS=Rattus norvegicus OX=10116 PE=2 SV=1
G3V712	457	0	50757.1	1	4	7.79263e-05	0.0197	8.2656	Keratin complex 2, basic, gene 7, isoform CRA_a OS=Rattus norvegicus OX=10116 GN=Krt7 PE=1 SV=1
E9PSP1	496	2	54398.5	2	4	7.1799e-05	0.0423	8.1679	Phospholipid transfer protein OS=Rattus norvegicus OX=10116 GN=Pltp PE=1 SV=1
F1M927	154	0	17843.4	2	5	0.000289061	0.1169	7.9288	Ubiquitin-like domain-containing protein OS=Rattus norvegicus OX=10116 PE=4 SV=2
E9PTN6	333	0	35974.3	3	4	0.000106944	0.0901	7.9186	Glyceraldehyde-3-phosphate dehydrogenase OS=Rattus norvegicus OX=10116 PE=3 SV=1
A0A0G2K8C3	116	0	12714.5	1	3	0.000230252	0.0948	7.8771	Ig-like domain-containing protein OS=Rattus norvegicus OX=10116 PE=4 SV=1
A0A0G2K3L1	116	0	12734.4	1	3	0.000230252	0.0948	7.8771	Ig-like domain-containing protein OS=Rattus norvegicus OX=10116 PE=4 SV=1
A0A0G2K3K8	111	0	12376	1	3	0.000240624	0.0991	7.8771	Ig-like domain-containing protein OS=Rattus norvegicus OX=10116 PE=1 SV=1
M0RCM6	116	0	12765.4	1	3	0.000230252	0.0948	7.8771	Ig-like domain-containing protein OS=Rattus norvegicus OX=10116 PE=1 SV=2
F1LZH0	123	0	13584.5	1	5	0.000361914	0.0569	7.7786	Ig-like domain-containing protein OS=Rattus norvegicus OX=10116 PE=1 SV=2
F1LRZ7	1064	0	114325	1	4	3.34702e-05	0.0075	7.7084	Neurofilament heavy polypeptide OS=Rattus norvegicus OX=10116 GN=Nefh PE=1 SV=1
P16884	1072	0	115290	1	4	3.32204e-05	0.0075	7.7084	Neurofilament heavy polypeptide OS=Rattus norvegicus OX=10116 GN=Nefh PE=1 SV=4
F1LW26	120	1	12899.4	1	3	0.000222577	0.0917	7.6529	Ig-like domain-containing protein OS=Rattus norvegicus OX=10116 PE=4 SV=3
D3ZMY4	117	0	12749.4	1	3	0.000228284	0.0855	7.3477	Ig-like domain-containing protein OS=Rattus norvegicus OX=10116 PE=4 SV=3
A0A0G2K980	100	0	11213.6	1	3	0.000267092	0.1	7.3477	Ig-like domain-containing protein OS=Rattus norvegicus OX=10116 PE=1 SV=1
M0RBD5	100	0	11111.5	1	3	0.000267092	0.1	7.3477	Ig-like domain-containing protein OS=Rattus norvegicus OX=10116 PE=1 SV=1
F1LWD1	126	0	14129.9	1	3	0.000211978	0.0794	7.3477	Ig-like domain-containing protein OS=Rattus norvegicus OX=10116 PE=1 SV=3
Q5VLR6	482	0	52334.7	1	3	5.54133e-05	0.0207	7.3477	BWK3 OS=Rattus norvegicus OX=10116 PE=2 SV=1
Q63050	75	0	8763.4	1	3	0.000356123	0.1467	6.549	Rat apolipoprotein B PI (Fragment) OS=Rattus norvegicus OX=10116 PE=2 SV=1
D4A0J6	165	0	18473.6	1	4	0.000215832	0.0545	6.2461	Ubiquitin-like domain-containing protein OS=Rattus norvegicus OX=10116 PE=4 SV=3
D3ZAB3	119	1	13237.2	1	2	0.000149632	0.1345	5.9425	Ig-like domain-containing protein OS=Rattus norvegicus OX=10116 PE=1 SV=3
Q63270	889	0	98047.3	1	3	3.00441e-05	0.009	5.3932	Cytoplasmic aconitate hydratase OS=Rattus norvegicus OX=10116 GN=Aco1 PE=1 SV=1; Additional IDs concatenated into MaxParsimony group: G3V6S2; Additional IDs concatenated into MaxParsimony group: G3V6S2
G3V6S2	889	0	98112.4	1	3	3.00441e-05	0.009	5.3932	Cytoplasmic aconitate hydratase OS=Rattus norvegicus OX=10116 GN=Aco1 PE=1 SV=1
D3ZC54	117	0	13103.5	1	3	0.000228284	0.0598	5.2999	Ig-like domain-containing protein OS=Rattus norvegicus OX=10116 PE=1 SV=2
M0RE02	117	0	12770.3	1	3	0.000228284	0.0598	5.2999	Ig-like domain-containing protein OS=Rattus norvegicus OX=10116 PE=1 SV=2
M0R693	117	0	12679.3	1	3	0.000228284	0.0598	5.2999	Ig-like domain-containing protein OS=Rattus norvegicus OX=10116 PE=4 SV=1
E9PTV9	333	0	35816	2	2	5.34719e-05	0.0841	5.2146	Glyceraldehyde-3-phosphate dehydrogenase OS=Rattus norvegicus OX=10116 PE=1 SV=2
Q5FVK4	74	1	8736.5	1	2	0.000240624	0.2838	5.1467	Sf3b1 protein OS=Rattus norvegicus OX=10116 GN=Sf3b1 PE=2 SV=1
Reverse_M0R4S7	645	1	72215.8	1	2	2.76064e-05	0.014	5.1111
P97617	83	0	9218.8	2	3	0.000321798	0.2651	4.7403	Glyceraldehyde 3-phosphate dehydrogenase (Fragment) OS=Rattus norvegicus OX=10116 GN=GAPDH PE=2 SV=1
O08619	732	0	82588.4	2	2	2.43253e-05	0.0396	4.6508	Coagulation factor XIII A chain OS=Rattus norvegicus OX=10116 GN=F13a1 PE=2 SV=3
G3V811	732	0	82983.6	2	2	2.43253e-05	0.0396	4.6508	Coagulation factor XIII A chain OS=Rattus norvegicus OX=10116 GN=F13a1 PE=1 SV=1; Additional IDs concatenated into MaxParsimony group: O08619; Additional IDs concatenated into MaxParsimony group: O08619
Q5EBA7	653	2	70672.9	2	2	2.72682e-05	0.0352	4.374	HGF activator OS=Rattus norvegicus OX=10116 GN=Hgfac PE=1 SV=1
F1LR02	1311	0	134545	1	1	6.79106e-06	0.013	3.9232	Collagen type XVIII alpha 1 chain OS=Rattus norvegicus OX=10116 GN=Col18a1 PE=1 SV=2; Additional IDs concatenated into MaxParsimony group: Q9QZD2, Q9WUW5; Additional IDs concatenated into MaxParsimony group: Q9QZD2, Q9WUW5
Q9WUW5	171	0	18903.5	1	1	5.20648e-05	0.0994	3.9232	Collagen type XVIII, alpha (I) chain (Fragment) OS=Rattus norvegicus OX=10116 GN=col18a1 PE=2 SV=1
Q9QZD2	226	0	25316.5	1	1	3.93941e-05	0.0752	3.9232	Collagen XVIII (Fragment) OS=Rattus norvegicus OX=10116 PE=2 SV=1
Reverse_contaminant_KERATIN22	645	1	65807.4	1	1	1.38032e-05	0.0465	3.7688
M0R8B5	120	0	12906.3	1	1	7.41923e-05	0.1417	3.6307	Ig-like domain-containing protein OS=Rattus norvegicus OX=10116 PE=1 SV=2; Additional IDs concatenated into MaxParsimony group: M0RCN6; Additional IDs concatenated into MaxParsimony group: M0RCN6
M0RCN6	114	0	12412.1	1	1	7.80972e-05	0.1491	3.6307	Similar to immunoglobulin kappa-chain VK-1 OS=Rattus norvegicus OX=10116 GN=RGD1563231 PE=1 SV=1
Reverse_D3ZTN0	4126	2	471753	2	2	4.3156e-06	0.0046	3.626
D3ZHX3	199	1	22465.6	1	2	8.94782e-05	0.0553	3.5193	DIRAS family GTPase 2 OS=Rattus norvegicus OX=10116 GN=Diras2 PE=4 SV=1
Q6P0K8	745	0	81730.8	1	1	1.19504e-05	0.0242	3.4102	Junction plakoglobin OS=Rattus norvegicus OX=10116 GN=Jup PE=1 SV=1; Additional IDs concatenated into MaxParsimony group: P70565; Additional IDs concatenated into MaxParsimony group: P70565
P70565	745	0	81707.7	1	1	1.19504e-05	0.0242	3.4102	Plakoglobin OS=Rattus norvegicus OX=10116 PE=2 SV=1
A0A0G2K8S2	335	0	35911.2	1	1	2.65763e-05	0.0418	3.324	Gp_dh_N domain-containing protein OS=Rattus norvegicus OX=10116 PE=1 SV=1
F1M4G6	319	0	33944.9	1	1	2.79093e-05	0.0439	3.324	Gp_dh_N domain-containing protein OS=Rattus norvegicus OX=10116 PE=3 SV=1
Q498M9	335	0	36114.1	1	1	2.65763e-05	0.0418	3.324	Similar to glyceraldehyde-3-phosphate dehydrogenase OS=Rattus norvegicus OX=10116 GN=LOC303448 PE=1 SV=1
F1M2N4	280	0	30373.2	1	1	3.17967e-05	0.05	3.324	Gp_dh_N domain-containing protein OS=Rattus norvegicus OX=10116 PE=1 SV=2
D3ZEN2	142	0	15345.7	1	1	6.26977e-05	0.0986	3.324	Gp_dh_C domain-containing protein OS=Rattus norvegicus OX=10116 PE=4 SV=2
A0A0G2K5X3	120	0	13292.7	1	2	0.000148385	0.0667	3.3174	Ig-like domain-containing protein OS=Rattus norvegicus OX=10116 PE=4 SV=1; Additional IDs concatenated into MaxParsimony group: D3ZZ08, A0A0G2JUY3
D3ZZ08	120	0	13164.7	1	2	0.000148385	0.0667	3.3174	Ig-like domain-containing protein OS=Rattus norvegicus OX=10116 PE=1 SV=2; Additional IDs concatenated into MaxParsimony group: A0A0G2K5X3, A0A0G2JUY3
A0A0G2JUY3	115	0	12714.3	1	2	0.000154836	0.0696	3.3174	Ig-like domain-containing protein OS=Rattus norvegicus OX=10116 PE=4 SV=1
A0A0G2JT70	96	0	10330.9	1	2	0.000185481	0.0833	3.2944	Ig-like domain-containing protein OS=Rattus norvegicus OX=10116 PE=4 SV=1
F1LVL4	119	0	13060.3	1	2	0.000149632	0.0672	3.2944	Ig-like domain-containing protein OS=Rattus norvegicus OX=10116 PE=4 SV=2
Q5U2U0	633	1	69146.7	1	1	1.40649e-05	0.0205	2.9914	ATP-dependent Clp protease ATP-binding subunit clpX-like, mitochondrial OS=Rattus norvegicus OX=10116 GN=Clpx PE=2 SV=1
Q5U1W7	206	1	22908.6	1	1	4.32188e-05	0.1117	2.9088	ER membrane protein complex subunit 9 OS=Rattus norvegicus OX=10116 GN=Emc9 PE=2 SV=1
Q8K4T8	30	0	3147.7	1	2	0.000593538	0.2667	2.8497	Glyceraldehyde-3-phosphate-dehydrogenase (Fragment) OS=Rattus norvegicus OX=10116 GN=GAPDH PE=4 SV=1
Reverse_F1LXV3	416	1	46526.6	1	1	2.14016e-05	0.0841	2.8105
Q6LEK4	48	0	5335.7	1	1	0.000185481	0.5208	2.6294	Rat K kininogen gene, 5'end (Fragment) OS=Rattus norvegicus OX=10116 PE=4 SV=1
A1A5Q9	153	0	15548.8	1	1	5.819e-05	0.0784	2.609	Igfbp3 protein OS=Rattus norvegicus OX=10116 GN=Igfbp3 PE=2 SV=1
P15473	292	0	31641.4	1	1	3.049e-05	0.0411	2.609	Insulin-like growth factor-binding protein 3 OS=Rattus norvegicus OX=10116 GN=Igfbp3 PE=1 SV=2; Additional IDs concatenated into MaxParsimony group: A1A5Q9; Additional IDs concatenated into MaxParsimony group: A1A5Q9
D3ZQR5	116	0	12741.4	1	1	7.67507e-05	0.1034	2.5993	Ig-like domain-containing protein OS=Rattus norvegicus OX=10116 PE=1 SV=1; Additional IDs concatenated into MaxParsimony group: F1M663; Additional IDs concatenated into MaxParsimony group: F1M663
F1M663	115	0	12706.3	1	1	7.74181e-05	0.1043	2.5993	Ig-like domain-containing protein OS=Rattus norvegicus OX=10116 PE=1 SV=2
A0A0G2K393	327	0	37208	1	1	2.72265e-05	0.0734	2.5271	Pleckstrin OS=Rattus norvegicus OX=10116 GN=Plek PE=1 SV=1
Q4KM33	350	0	39952.5	1	1	2.54374e-05	0.0686	2.5271	Pleckstrin OS=Rattus norvegicus OX=10116 GN=Plek PE=1 SV=1; Additional IDs concatenated into MaxParsimony group: A0A0G2K393; Additional IDs concatenated into MaxParsimony group: A0A0G2K393
D3ZC56	7512	1	846665	1	1	1.18518e-06	0.0021	2.4443	Dystonin OS=Rattus norvegicus OX=10116 GN=Dst PE=1 SV=3
A0A0G2KB38	424	0	48569.1	1	1	2.09978e-05	0.0684	2.4402	Speckle type BTB/POZ protein-like OS=Rattus norvegicus OX=10116 GN=Spopl PE=4 SV=1; Additional IDs concatenated into MaxParsimony group: B2RZC7; Additional IDs concatenated into MaxParsimony group: B2RZC7
B2RZC7	392	0	44696.2	1	1	2.27119e-05	0.074	2.4402	Similar to speckle-type POZ protein (Predicted) OS=Rattus norvegicus OX=10116 GN=Spopl PE=2 SV=1
Reverse_F1LV07	4330	1	495865	1	1	2.05614e-06	0.0044	2.3287
Reverse_Q6TMG5	412	1	48018.2	1	1	2.16094e-05	0.0777	2.2366
A0A0G2JWU1	253	0	27379	1	1	3.519e-05	0.0553	2.2206	Triosephosphate isomerase OS=Rattus norvegicus OX=10116 PE=1 SV=1
A0A0G2JWJ4	263	0	29020.7	1	1	3.3852e-05	0.0532	2.2206	Triosephosphate isomerase OS=Rattus norvegicus OX=10116 GN=LOC100911515 PE=1 SV=1; Additional IDs concatenated into MaxParsimony group: A0A0G2JWU1, P48500, Q6SA19; Additional IDs concatenated into MaxParsimony group: A0A0G2JWU1, Q6SA19, P48500
Q6SA19	249	0	26831.7	1	1	3.57553e-05	0.0562	2.2206	Triosephosphate isomerase OS=Rattus norvegicus OX=10116 GN=LOC500959 PE=2 SV=1
P48500	249	0	26813.7	1	1	3.57553e-05	0.0562	2.2206	Triosephosphate isomerase OS=Rattus norvegicus OX=10116 GN=Tpi1 PE=1 SV=2

## Sheet: Table S1B
Table S1B - Number and percentage of proteins found related to each biological process for the Ba-MNPs incubated in plasma for 30 min.
	Ba-MNPs (30 min)
	Biological Process	Number	Percentage
	Metabolic Processes	93	0.1667
	Cell Adhesion	22	0.0394
	Transport of Molecules	26	0.0466
	Inflammatory Processes	37	0.0663
	Immunological Processes	248	0.4444
	Coagulation Processes	64	0.1147
	Others	68	0.1219
	TOTAL	558
	The cells that were not painted were considered contamination

## Sheet: Table S1C
Table S1C - Proteomic data and classification for the Ba-MNPs incubated in plasma for 1 h.
Locus	Length	Unique peptides	Mol w	Sequence count	Spectrum count	NSAF	Coverage	Protein Score	Description
P08649	1737	0	192024	82	578	0.00419789	0.536	2050.68	Complement C4 OS=Rattus norvegicus OX=10116 GN=C4 PE=1 SV=3
Q6MG79	1737	0	192052	82	578	0.00419789	0.536	2050.68	Complement component 4, gene 1 OS=Rattus norvegicus OX=10116 GN=C4a PE=4 SV=1
A0A0G2JW12	1737	25	192109	82	578	0.00419789	0.536	2050.68	Complement C4-like OS=Rattus norvegicus OX=10116 GN=LOC103689965 PE=4 SV=1
F1LNM4	1549	0	170428	78	574	0.00467481	0.5649	2039.38	Complement C4-like (Fragment) OS=Rattus norvegicus OX=10116 GN=LOC103689965 PE=4 SV=2
M0RB00	1734	26	190460	83	574	0.00417605	0.5012	2034.75	Complement C4A OS=Rattus norvegicus OX=10116 GN=C4a PE=4 SV=2; Additional IDs concatenated into MaxParsimony group: Q6MG79, A0A0G2JW12, P08649, F1LNM4, A0A0G2JV52, A0A0G2JT52; Additional IDs concatenated into MaxParsimony group: Q6MG79, P08649, A0A0G2JW12, F1LNM4, A0A0G2JV52, A0A0G2JT52
A0A0G2JV52	1374	63	150790	76	567	0.00520594	0.615	2019.64	Complement C4A (Fragment) OS=Rattus norvegicus OX=10116 GN=C4a PE=4 SV=4
M0RBF1	1663	43	186188	103	555	0.00421021	0.6182	1844.25	Complement C3 OS=Rattus norvegicus OX=10116 GN=C3 PE=1 SV=1; Additional IDs concatenated into MaxParsimony group: M0RBJ7, P01026; Additional IDs concatenated into MaxParsimony group: M0RBJ7, P01026
contaminant_KERATIN03	593	21	59464.9	43	455	0.00967965	0.5632	1803.67
M0RBJ7	1662	0	186100	92	511	0.00387876	0.5951	1664.07	Complement C3 OS=Rattus norvegicus OX=10116 GN=C3 PE=1 SV=1
F1M6Z1	4506	5	509358	152	545	0.00152584	0.3981	1648.1	Apolipoprotein B-100 OS=Rattus norvegicus OX=10116 GN=Apob PE=1 SV=1; Additional IDs concatenated into MaxParsimony group: Q7TMA5, Q62970, Q4G047, Q64721, Q63050, Q78EF2, Q63051; Additional IDs concatenated into MaxParsimony group: Q7TMA5, Q62970, Q4G047, Q64721, Q63050, Q78EF2, Q63051
F7F389	580	41	65225.1	51	511	0.0111147	0.5569	1622.69	Complement component C9 OS=Rattus norvegicus OX=10116 GN=C9 PE=1 SV=1; Additional IDs concatenated into MaxParsimony group: Q5BKC4, Q62930; Additional IDs concatenated into MaxParsimony group: Q5BKC4, Q62930
Q7TMA5	4743	307	535670	142	530	0.0014097	0.3677	1612.41	Apolipoprotein B-100 OS=Rattus norvegicus OX=10116 GN=Apob PE=1 SV=1
Q5BKC4	567	0	63715.5	45	503	0.0111915	0.5697	1604.66	C9 protein OS=Rattus norvegicus OX=10116 GN=C9 PE=2 SV=1
Q62930	554	0	62222.6	44	500	0.0113858	0.5722	1601.26	Complement component C9 OS=Rattus norvegicus OX=10116 GN=C9 PE=1 SV=1
Q6MG90	1737	5	191988	65	441	0.00320289	0.4393	1589.64	Complement C4B (Chido blood group) OS=Rattus norvegicus OX=10116 GN=C4b PE=1 SV=1
P01026	1663	0	186324	82	456	0.0034592	0.531	1490.2	Complement C3 OS=Rattus norvegicus OX=10116 GN=C3 PE=1 SV=3
Q6P734	504	38	55558.1	38	380	0.00951166	0.5635	1451.33	Plasma protease C1 inhibitor OS=Rattus norvegicus OX=10116 GN=Serping1 PE=2 SV=1
Q5EBC0	933	2	103673	48	376	0.00508404	0.6377	1385.06	Inter alpha-trypsin inhibitor, heavy chain 4 OS=Rattus norvegicus OX=10116 GN=Itih4 PE=1 SV=1; Additional IDs concatenated into MaxParsimony group: D3ZFC6; Additional IDs concatenated into MaxParsimony group: D3ZFC6
D3ZFC6	932	0	103667	46	370	0.00500828	0.6148	1371.6	Inter-alpha-trypsin inhibitor heavy chain 4 OS=Rattus norvegicus OX=10116 GN=Itih4 PE=1 SV=3
O35802	932	2	103525	47	364	0.00492707	0.5848	1349.83	Inter-alpha-inhibitor H4 heavy chain OS=Rattus norvegicus OX=10116 GN=ITIH4 PE=2 SV=1
Q5M7T5	465	19	52182.8	39	346	0.00938699	0.6	1295.3	Serine (Or cysteine) peptidase inhibitor, clade C (Antithrombin), member 1 OS=Rattus norvegicus OX=10116 GN=Serpinc1 PE=1 SV=1; Additional IDs concatenated into MaxParsimony group: Q7TPI9, A0A096MIW4; Additional IDs concatenated into MaxParsimony group: Q7TPI9, A0A096MIW4
Q5FVS2	638	4	71218	59	368	0.00727663	0.6755	1093.14	Kallikrein B, plasma 1 OS=Rattus norvegicus OX=10116 GN=Klkb1 PE=1 SV=1; Additional IDs concatenated into MaxParsimony group: P14272, D3ZF49, A0A0G2K135, Q9WUW3, G3V8E5, P50343, G3V8F2, Q6P6W8, P27435, G3V934, F1M7H8, M0R4W8, P18291, A0A0A0MY24, Q06605, Q63224, F1LSX0; Additional IDs concatenated into MaxParsimony group: P14272, D3ZF49, A0A0G2K135, Q9WUW3, G3V8E5, P50343, G3V8F2, P27435, Q6P6W8, …
Q71SA3	1170	14	129570	51	349	0.00376307	0.4051	1080.38	Thrombospondin 1 OS=Rattus norvegicus OX=10116 GN=Thbs1 PE=2 SV=1; Additional IDs concatenated into MaxParsimony group: A0A0G2JV24, D4A2G6, P49744, A0A0G2K7L8, F1LMS5, A0A0G2JZH3, M0RBU0, P35444, A0A0G2JXN9; Additional IDs concatenated into MaxParsimony group: A0A0G2JV24, D4A2G6, P49744, A0A0G2K7L8, F1LMS5, A0A0G2JZH3, P35444, M0RBU0, A0A0G2JXN9
P14272	638	0	71209	55	355	0.00701958	0.6755	1057.81	Plasma kallikrein OS=Rattus norvegicus OX=10116 GN=Klkb1 PE=1 SV=1
A0A0G2K3G0	536	1	60313.2	35	326	0.00767284	0.5336	1038.88	Histidine-rich glycoprotein OS=Rattus norvegicus OX=10116 GN=Hrg PE=1 SV=1; Additional IDs concatenated into MaxParsimony group: Q99PS8, A0A0G2K9Y5; Additional IDs concatenated into MaxParsimony group: Q99PS8, A0A0G2K9Y5
Q99PS8	525	0	58993.7	34	325	0.00780957	0.5448	1036.84	Histidine-rich glycoprotein OS=Rattus norvegicus OX=10116 GN=Hrg PE=1 SV=1
A0A0G2K9Y5	515	0	57872.2	34	325	0.00796121	0.5553	1036.84	Histidine-rich glycoprotein OS=Rattus norvegicus OX=10116 GN=Hrg PE=1 SV=1
contaminant_KERATIN02	622	42	61931.8	43	259	0.00525306	0.6833	980.432	; Additional IDs concatenated into MaxParsimony group: Q6IFW6, Q6IFV1, contaminant_KERATIN12, A0A0G2K9Q9, Q6IFV3, A0A0G2JXJ9, contaminant_KERATIN06, Q6IFU7, Q6IFV0, Q6IFU9, Q63279, contaminant_KERATIN10, contaminant_KERATIN04, Q6IFV4, A0A221LEF7, Q6IFW8, Q6IFX0, A0A0G2JU48, Q5BJY9, A0A0G2JW58, A0A0G2K4H9, Q6IFV5, Q6IFW5, F1MAS0, Q6IFV7, Q6IFV6, Q6IFW2, D3Z7Y6, P25030, contaminant_KERATIN09, conta…
P24090	352	6	37940.2	20	200	0.00716788	0.5398	891.701	Alpha-2-HS-glycoprotein OS=Rattus norvegicus OX=10116 GN=Ahsg PE=1 SV=2; Additional IDs concatenated into MaxParsimony group: Q7TP75; Additional IDs concatenated into MaxParsimony group: Q7TP75
contaminant_KERATIN13	643	29	65436.5	44	270	0.00529732	0.5163	881.407
Q6IFW6	526	0	56452.5	21	208	0.00498862	0.2795	788.336	Keratin, type I cytoskeletal 10 OS=Rattus norvegicus OX=10116 GN=Krt10 PE=3 SV=1
A0A0G2K2V6	559	0	56760.7	21	208	0.00469413	0.263	788.336	Keratin, type I cytoskeletal 10 OS=Rattus norvegicus OX=10116 GN=Krt10 PE=1 SV=1
Q569B8	590	1	65028.6	25	226	0.00483236	0.4271	775.611	Igh-6 protein OS=Rattus norvegicus OX=10116 GN=Igh-6 PE=2 SV=1; Additional IDs concatenated into MaxParsimony group: Q569B3, Q3B8R4, Q4QQW0, F1LPW0, F1LM30, A0A0G2JVP4, Q5RK07, Q3SYP8; Additional IDs concatenated into MaxParsimony group: Q569B3, Q3B8R4, Q4QQW0, F1LPW0, F1LM30, A0A0G2JVP4, Q5RK07, Q3SYP8
P08934	639	5	70870.8	41	265	0.00523176	0.5603	774.11	Kininogen-1 OS=Rattus norvegicus OX=10116 GN=Kng1 PE=2 SV=1; Additional IDs concatenated into MaxParsimony group: F7EUK4, P08932, A0A0G2KA54, P01048, A0A0G2KAY3, Q63581, Q6LE95, Q63284; Additional IDs concatenated into MaxParsimony group: F7EUK4, P08932, A0A0G2KA54, P01048, A0A0G2KAY3, Q63581, Q6LE95, Q63284
Q3B8R4	595	0	65488.8	24	225	0.00477055	0.4235	773.292	Igh-6 protein OS=Rattus norvegicus OX=10116 GN=Igh-6 PE=2 SV=1
A0A0G2JVP4	470	0	51657.8	24	225	0.00603932	0.5362	773.292	Immunoglobulin heavy constant mu OS=Rattus norvegicus OX=10116 GN=Ighm PE=1 SV=1
Q569B3	617	0	68300.2	24	225	0.00460045	0.4084	773.292	Igh-6 protein OS=Rattus norvegicus OX=10116 GN=Igh-6 PE=2 SV=1
Q4QQW0	591	0	64869.2	24	225	0.00480284	0.4264	773.292	Igh-6 protein (Fragment) OS=Rattus norvegicus OX=10116 GN=Igh-6 PE=2 SV=1
F1LPW0	495	0	54818.3	24	225	0.0057343	0.5091	773.292	Immunoglobulin heavy constant mu OS=Rattus norvegicus OX=10116 GN=Ighm PE=1 SV=1
F1LM30	480	0	52893.3	24	225	0.0059135	0.525	773.292	Immunoglobulin heavy constant mu OS=Rattus norvegicus OX=10116 GN=Ighm PE=1 SV=3
contaminant_KERATIN22	645	38	65807.4	49	225	0.00440074	0.7705	755.981	; Additional IDs concatenated into MaxParsimony group: F7FFV2, A0A0G2K509, Q6IG02, A0A0G2JWX4, A0A0G2JST3, Q6IMF3, Q4FZU2, contaminant_KERATIN14, A0A0H2UHH5, Q6IG05, Q63280, contaminant_KERATIN15, A0A0G2JW69, A0A0G2JZQ9, Q6IG00, A0A0G2K6P7, Q6IG01, Q10758, Q6IFZ5, A0A0G2JVA8, G3V908, contaminant_KERATIN20, A0A0G2JUG1, Q6IG03, A0A0G2JXH6, A0A0G2K7N1, Q6IG04, Q63282; Additional IDs concatenated int…
O70211	603	0	66864.7	21	190	0.00397502	0.4544	723.704	Insulin-like growth factor binding protein complex acid-labile subunit OS=Rattus norvegicus OX=10116 PE=4 SV=1
P35859	603	0	66751.6	20	184	0.00384949	0.4395	712.724	Insulin-like growth factor-binding protein complex acid labile subunit OS=Rattus norvegicus OX=10116 GN=Igfals PE=1 SV=1
Q62905	478	2	54626.2	22	215	0.00567432	0.4435	693.623	Vitronectin OS=Rattus norvegicus OX=10116 PE=2 SV=1; Additional IDs concatenated into MaxParsimony group: Q7TQ11, Q3KR94; Additional IDs concatenated into MaxParsimony group: Q7TQ11, Q3KR94
Q3KR94	478	0	54672.2	20	213	0.00562153	0.4435	689.047	Vitronectin OS=Rattus norvegicus OX=10116 GN=Vtn PE=1 SV=1
Q7TQ11	490	0	55906.7	20	213	0.00548386	0.4327	689.047	Aa1018 OS=Rattus norvegicus OX=10116 GN=Vtn PE=1 SV=1
F1LRE2	603	1	66838.7	21	180	0.00376581	0.4544	682.387	Insulin-like growth factor binding protein, acid labile subunit, isoform CRA_b OS=Rattus norvegicus OX=10116 GN=Igfals PE=1 SV=2; Additional IDs concatenated into MaxParsimony group: P35859; Additional IDs concatenated into MaxParsimony group: P35859
Q5M8A0	433	3	47842.6	37	235	0.00684673	0.649	675.698	Kng2 protein OS=Rattus norvegicus OX=10116 GN=Kng2l1 PE=2 SV=1
Q5RK07	371	0	40833.6	21	195	0.00663077	0.6011	673.08	Igh-6 protein (Fragment) OS=Rattus norvegicus OX=10116 GN=Igh-6 PE=2 SV=1
F1LST1	2387	0	262573	51	200	0.00105701	0.3217	653.606	Fibronectin OS=Rattus norvegicus OX=10116 GN=Fn1 PE=1 SV=3
P04937	2477	0	272323	51	200	0.00101861	0.3101	653.606	Fibronectin OS=Rattus norvegicus OX=10116 GN=Fn1 PE=1 SV=2; Additional IDs concatenated into MaxParsimony group: A0A096P6L8, F1LST1, Q9Z1G8, Q6LC76
A0A096P6L8	2477	0	272258	51	200	0.00101861	0.3101	653.606	Fibronectin OS=Rattus norvegicus OX=10116 GN=Fn1 PE=1 SV=2; Additional IDs concatenated into MaxParsimony group: P04937, F1LST1, Q9Z1G8, Q6LC76
Q32Q89	427	2	48319.6	27	206	0.00608615	0.5082	638.583	Fgl2 protein (Fragment) OS=Rattus norvegicus OX=10116 GN=Fgl2 PE=2 SV=1; Additional IDs concatenated into MaxParsimony group: G3V7P2, Q5U3X5, Q6IN12, Q9EPT7; Additional IDs concatenated into MaxParsimony group: G3V7P2, Q5U3X5, Q6IN12, Q9EPT7
Q5U3X5	422	0	47753.3	25	204	0.00609847	0.5142	635.149	Fgl2 protein (Fragment) OS=Rattus norvegicus OX=10116 GN=Fgl2 PE=2 SV=1
Q6IN12	419	0	47367.1	25	204	0.00614213	0.5179	635.149	Fgl2 protein (Fragment) OS=Rattus norvegicus OX=10116 GN=Fgl2 PE=2 SV=1
G3V7P2	429	0	48606.8	25	204	0.00599896	0.5058	635.149	Fibrinogen-like 2 OS=Rattus norvegicus OX=10116 GN=Fgl2 PE=1 SV=1
Q7TPI9	593	0	66431.7	20	170	0.00361657	0.2192	628.822	Ac2-248 OS=Rattus norvegicus OX=10116 PE=2 SV=1
Q68FP1	780	35	85996.1	35	165	0.00266866	0.4885	590.098	Gelsolin OS=Rattus norvegicus OX=10116 GN=Gsn PE=1 SV=1
Q4KM66	234	1	25657.5	16	171	0.00921899	0.4274	577.704	LOC500183 protein OS=Rattus norvegicus OX=10116 GN=LOC500183 PE=1 SV=1; Additional IDs concatenated into MaxParsimony group: A0A0G2JZW1, F1M229, B2RZB2, A0A0H2UI36, P01835, P01836, A0A0G2JXF0, F1LZH0, M0R816, F1LZY6; Additional IDs concatenated into MaxParsimony group: A0A0G2JZW1, F1M229, B2RZB2, A0A0H2UI36, P01835, P01836, A0A0G2JXF0, F1LZH0, M0R816, F1LZY6
F1LTN6	228	0	24881.1	15	170	0.00940627	0.4123	572.757	Uncharacterized protein OS=Rattus norvegicus OX=10116 PE=1 SV=2
A0A0G2JZW1	223	0	24303.8	15	170	0.00961717	0.4215	572.757	Ig-like domain-containing protein OS=Rattus norvegicus OX=10116 PE=4 SV=1
F1M229	189	0	20902.1	15	170	0.0113472	0.4974	572.757	Ig-like domain-containing protein OS=Rattus norvegicus OX=10116 PE=1 SV=3
B2RZB2	233	0	25570.5	14	168	0.00909613	0.3734	569.72	Uncharacterized protein OS=Rattus norvegicus OX=10116 PE=2 SV=1
A0A0H2UI36	157	0	17020.1	14	168	0.0134993	0.5541	569.72	Ig-like domain-containing protein OS=Rattus norvegicus OX=10116 PE=1 SV=1
G3V843	617	4	70322.6	29	172	0.00351679	0.3274	557.48	Prothrombin OS=Rattus norvegicus OX=10116 GN=F2 PE=1 SV=1; Additional IDs concatenated into MaxParsimony group: P18292; Additional IDs concatenated into MaxParsimony group: P18292
A0A0G2K4I9	622	14	69535.8	34	164	0.00332626	0.6077	554.934	Coagulation factor XI OS=Rattus norvegicus OX=10116 GN=F11 PE=1 SV=1
P20762	329	18	36530.4	24	183	0.00701711	0.6991	549.623	Ig gamma-2C chain C region OS=Rattus norvegicus OX=10116 PE=2 SV=1
P18292	617	0	70348.7	25	164	0.00335322	0.3274	544.404	Prothrombin OS=Rattus norvegicus OX=10116 GN=F2 PE=1 SV=1
D4A3E0	1210	31	135500	31	152	0.00158475	0.2529	538.434	Multimerin 1 OS=Rattus norvegicus OX=10116 GN=Mmrn1 PE=4 SV=1
Q9EPT7	357	0	40921.9	21	180	0.00636074	0.5126	537.321	Prothrombinase FGL2 OS=Rattus norvegicus OX=10116 PE=2 SV=1
Q5M8C3	423	4	47998.9	24	164	0.0048911	0.5083	520.774	Serine (Or cysteine) proteinase inhibitor, clade A (Alpha-1 antiproteinase, antitrypsin), member 4 OS=Rattus norvegicus OX=10116 GN=Serpina4 PE=1 SV=1; Additional IDs concatenated into MaxParsimony group: P97569; Additional IDs concatenated into MaxParsimony group: P97569
Q5M7V3	461	0	50898.3	28	170	0.00465212	0.5922	510.377	LOC367586 protein OS=Rattus norvegicus OX=10116 GN=LOC367586 PE=2 SV=1; Additional IDs concatenated into MaxParsimony group: Q5BJZ2, Q5BK05, P20760, F1LPQ6, A0A0G2K9Y0, F1LN61, Q4VBH1, P20759, A0A0G2JT95, A0A0G2K290, M0RBL2, A0A0G2JWW4, M0R8Q9, A0A0G2K304, A0A0G2K4A4, F1LYU3, A0A0G2K3A6, contaminant_NRL_1IKFH, contaminant_NRL_1INDH, M0R5S4, A0A0G2JYX2, F8SQR6, A0A0G2JUY4, A0A0G2K758, M0R3Y4, F1M0…
P14046	1477	1	163652	45	160	0.0013666	0.369	505.195	Alpha-1-inhibitor 3 OS=Rattus norvegicus OX=10116 GN=A1i3 PE=1 SV=1; Additional IDs concatenated into MaxParsimony group: A0A0G2K926, D4AA52, A0A0G2JUW7, A0A0G2JUP5, Q6IE52, M0R5V7, P06238, Q5FX35, Q5D1M8, Q9JMK6; Additional IDs concatenated into MaxParsimony group: A0A0G2K926, D4AA52, A0A0G2JUW7, A0A0G2JUP5, Q6IE52, M0R5V7, P06238, Q5FX35, Q5D1M8, Q9JMK6
P02770	608	2	68668.1	28	165	0.0034236	0.4342	497.029	Serum albumin OS=Rattus norvegicus OX=10116 GN=Alb PE=1 SV=2
P97569	423	0	47972.9	20	152	0.00453322	0.4681	491.031	Kallistatin OS=Rattus norvegicus OX=10116 PE=2 SV=1
A0A0G2JSH5	608	5	68696.1	31	164	0.00340285	0.4243	488.284	Serum albumin OS=Rattus norvegicus OX=10116 GN=Alb PE=1 SV=1
M0R979	1144	2	126942	39	183	0.00201803	0.3103	488.096	Thrombospondin 1 OS=Rattus norvegicus OX=10116 GN=Thbs1 PE=1 SV=2
A0A0G2K926	1477	0	163600	43	154	0.00131536	0.3453	487.958	Murinoglobulin-1 OS=Rattus norvegicus OX=10116 GN=LOC297568 PE=1 SV=1
A0A0G2JSK1	416	2	46430	22	132	0.00400298	0.5312	483.416	RCG20603 OS=Rattus norvegicus OX=10116 GN=Serpina3c PE=3 SV=1
Q5M842	458	1	50217.8	26	160	0.00440715	0.5437	481.22	IgG-2a protein OS=Rattus norvegicus OX=10116 GN=IgG-2a PE=1 SV=1
Q5BJZ2	458	0	50110.6	25	158	0.00435206	0.5437	475.917	LOC367586 protein OS=Rattus norvegicus OX=10116 GN=LOC367586 PE=1 SV=1
Q5BK05	458	0	49893.6	25	158	0.00435206	0.5437	475.917	LOC367586 protein OS=Rattus norvegicus OX=10116 GN=LOC367586 PE=2 SV=1
D4AA52	1477	0	163598	41	150	0.00128119	0.3243	474.617	Murinoglobulin-1 OS=Rattus norvegicus OX=10116 GN=LOC297568 PE=1 SV=3
P09006	418	0	46604.3	27	133	0.00401401	0.6029	473.536	Serine protease inhibitor A3N OS=Rattus norvegicus OX=10116 GN=Serpina3n PE=1 SV=3
A0A0H2UHI5	408	0	45434.6	27	133	0.00411239	0.6176	473.536	Serine protease inhibitor A3N OS=Rattus norvegicus OX=10116 GN=Serpina3n PE=1 SV=1
A0A0G2K9B1	432	0	48324.1	27	133	0.00388393	0.5833	473.536	Serine protease inhibitor A3N OS=Rattus norvegicus OX=10116 GN=LOC299282 PE=1 SV=1; Additional IDs concatenated into MaxParsimony group: P09006, A0A0H2UHI5, E0A3N4, A0A0G2KB85, A0A0G2K1T8, Q7TMB9, F1LM05, A0A0G2JYK0, A0A0G2JXK5, P09005, F1M8F5, Q63556; Additional IDs concatenated into MaxParsimony group: P09006, A0A0H2UHI5, E0A3N4, A0A0G2KB85, A0A0G2K1T8, Q7TMB9, F1LM05, A0A0G2JYK0, A0A0G2JXK5, P…
P01835	106	0	11575.5	12	140	0.0166619	0.8113	471.504	Ig kappa chain C region, B allele OS=Rattus norvegicus OX=10116 PE=1 SV=1
G3V7Z4	397	3	44003.3	23	141	0.00448055	0.4761	470.889	Glia-derived nexin OS=Rattus norvegicus OX=10116 GN=Serpine2 PE=3 SV=1; Additional IDs concatenated into MaxParsimony group: P07092, D3ZPF9, D3ZJK2, F1MAA9, Q6IE44; Additional IDs concatenated into MaxParsimony group: P07092, D3ZPF9, D3ZJK2, Q6IE44, F1MAA9
P20760	322	0	35145.4	24	155	0.00607266	0.7143	464.348	Ig gamma-2A chain C region OS=Rattus norvegicus OX=10116 GN=Igg-2a PE=1 SV=1
E0A3N4	430	0	47992	26	129	0.00378464	0.5605	462.072	Serpina3n-like protein OS=Rattus norvegicus OX=10116 PE=2 SV=1
A0A0G2KB85	430	0	48038	26	129	0.00378464	0.5605	462.072	Serine protease inhibitor A3N OS=Rattus norvegicus OX=10116 GN=LOC299282 PE=1 SV=1
P07092	397	0	44017.3	20	128	0.00406745	0.4408	437.475	Glia-derived nexin OS=Rattus norvegicus OX=10116 GN=Serpine2 PE=1 SV=1
Q03626	1487	0	165203	38	136	0.0011538	0.3134	426.346	Murinoglobulin-1 OS=Rattus norvegicus OX=10116 GN=Mug1 PE=2 SV=1
D4A6E3	1487	3	165203	40	137	0.00116229	0.2999	426.184	Murinoglobulin-1 OS=Rattus norvegicus OX=10116 GN=Mug1 PE=1 SV=2
A0A0G2JUW7	1487	0	165637	37	134	0.00113683	0.2999	420.426	Murinoglobulin-1 OS=Rattus norvegicus OX=10116 GN=Mug1 PE=4 SV=1
P05545	416	2	46514.1	20	111	0.00336614	0.4712	420.319	Serine protease inhibitor A3K OS=Rattus norvegicus OX=10116 GN=Serpina3k PE=1 SV=3
A0A142BM04	203	1	22278	9	120	0.00745742	0.3695	416.331	Anti-F4/80 kappa light chain variable region (Fragment) OS=Rattus norvegicus OX=10116 PE=2 SV=1
A0A0G2JV24	1152	0	127771	33	159	0.0017412	0.2743	411.095	Thrombospondin 1 OS=Rattus norvegicus OX=10116 GN=Thbs1 PE=1 SV=1
A0A0G2K1T8	416	0	46257.9	23	111	0.00336614	0.6346	401.764	Serine protease inhibitor A3N OS=Rattus norvegicus OX=10116 GN=LOC299282 PE=1 SV=1
A0A0G2JU99	203	1	22881.3	9	108	0.00671167	0.2808	400.966	Selenoprotein P OS=Rattus norvegicus OX=10116 GN=Selenop PE=1 SV=1
P25236	385	1	43047.8	9	107	0.00350612	0.1481	399.637	Selenoprotein P OS=Rattus norvegicus OX=10116 GN=Selenop PE=1 SV=2
B2RYM3	904	26	100508	26	110	0.00153507	0.3827	395.846	Inter-alpha trypsin inhibitor, heavy chain 1 OS=Rattus norvegicus OX=10116 GN=Itih1 PE=1 SV=1
Q6TUF8	556	3	62930.8	23	109	0.00247318	0.3831	380.804	Coagulation factor XI OS=Rattus norvegicus OX=10116 GN=F11 PE=1 SV=1
F1LM05	610	0	68105.5	22	95	0.0019647	0.3803	341.108	Serine protease inhibitor A3N OS=Rattus norvegicus OX=10116 GN=LOC299282 PE=1 SV=1
A0A0G2JYK0	609	0	67922.4	22	95	0.00196793	0.381	341.108	Serine protease inhibitor A3N OS=Rattus norvegicus OX=10116 GN=LOC299282 PE=1 SV=1
Q7TMB9	611	0	68162.5	22	95	0.00196149	0.3797	341.108	Ab1-021 OS=Rattus norvegicus OX=10116 GN=LOC299282 PE=2 SV=1
F1LM19	352	2	38304.6	16	100	0.00358394	0.4318	340.851	Uncharacterized protein OS=Rattus norvegicus OX=10116 PE=1 SV=3
P04639	259	17	30025.2	17	92	0.00448117	0.583	333.8	Apolipoprotein A-I OS=Rattus norvegicus OX=10116 GN=Apoa1 PE=1 SV=2
Q63313	481	0	53548.3	19	106	0.00278012	0.4324	326.75	Lipopolysaccharide-binding protein OS=Rattus norvegicus OX=10116 GN=Lbp PE=2 SV=1; Additional IDs concatenated into MaxParsimony group: Q3MID7; Additional IDs concatenated into MaxParsimony group: Q3MID7
Q3MID7	481	0	53446.3	19	106	0.00278012	0.4324	326.75	Lipopolysaccharide-binding protein OS=Rattus norvegicus OX=10116 GN=Lbp PE=1 SV=1
A0A0G2K477	466	2	51086.3	18	110	0.0029779	0.3798	320.378	Immunoglobulin heavy constant mu OS=Rattus norvegicus OX=10116 GN=Ighm PE=4 SV=1
A0A0G2K9Y0	467	0	51541.3	18	105	0.00283645	0.3255	317.353	Immunoglobulin heavy constant mu OS=Rattus norvegicus OX=10116 GN=Ighm PE=4 SV=1
F1LPQ6	468	0	51619.3	18	105	0.00283039	0.3248	317.353	Immunoglobulin heavy constant mu OS=Rattus norvegicus OX=10116 GN=Ighm PE=4 SV=2
A0A0G2JUP5	1450	0	161244	33	107	0.000930934	0.2655	315.303	Murinoglobulin-1 OS=Rattus norvegicus OX=10116 GN=Mug1 PE=4 SV=1
D4A8G5	685	13	74687.8	13	78	0.00143651	0.3255	313.252	Transforming growth factor, beta-induced OS=Rattus norvegicus OX=10116 GN=Tgfbi PE=1 SV=2
Q80ZA3	418	20	46418.2	20	85	0.00256535	0.5407	308.024	Alpha-2 antiplasmin OS=Rattus norvegicus OX=10116 GN=Serpinf1 PE=1 SV=1
F1LN61	456	0	50333.7	16	100	0.00276655	0.3092	304.814	Immunoglobulin heavy constant mu OS=Rattus norvegicus OX=10116 GN=Ighm PE=4 SV=3
Q569B4	468	1	52268.8	16	96	0.00258779	0.3141	295.01	Ighg protein OS=Rattus norvegicus OX=10116 GN=Ighg PE=1 SV=1
Q7TP75	553	0	61426.6	13	87	0.00198471	0.2387	293.649	Aa2-066 OS=Rattus norvegicus OX=10116 PE=1 SV=1
Q6IE52	1448	0	161469	30	98	0.000853809	0.2265	291.791	Murinoglobulin-2 OS=Rattus norvegicus OX=10116 GN=Mug2 PE=1 SV=1
P02091	147	0	15951.2	14	101	0.00866777	0.8844	288.457	Hemoglobin subunit beta-1 OS=Rattus norvegicus OX=10116 GN=Hbb PE=1 SV=3; Additional IDs concatenated into MaxParsimony group: A0A0G2JSW3, A0A1K0FUA6, P11517, A0A0G2JTW9, Q6PDU6, Q63011, Q62670, Q63223, O88752; Additional IDs concatenated into MaxParsimony group: A0A0G2JSW3, P11517, A0A1K0FUA6, A0A0G2JTW9, Q6PDU6, Q63011, Q62670, Q63223, O88752
Q5M891	601	1	67139.6	26	125	0.00262385	0.3877	286.492	C4b-binding protein alpha chain OS=Rattus norvegicus OX=10116 GN=C4bpa PE=1 SV=1; Additional IDs concatenated into MaxParsimony group: Q63514; Additional IDs concatenated into MaxParsimony group: Q63514
M0R5V7	1365	0	151849	29	96	0.000887241	0.2432	286.468	Murinoglobulin-2 OS=Rattus norvegicus OX=10116 GN=Mug2 PE=1 SV=2
Q63514	558	0	62207	25	124	0.00280344	0.4176	284.669	C4b-binding protein alpha chain OS=Rattus norvegicus OX=10116 GN=C4bpa PE=2 SV=1
Q4VBH1	467	0	51600.2	15	93	0.00251229	0.2741	282.893	Ighg protein OS=Rattus norvegicus OX=10116 GN=Ighg PE=1 SV=1
Q62894	562	23	63190	23	106	0.00237943	0.3843	282.536	Extracellular matrix protein 1 OS=Rattus norvegicus OX=10116 GN=Ecm1 PE=1 SV=2
A0A0G2JSW3	147	0	15937.2	13	97	0.00832449	0.8027	279.773	Globin a4 OS=Rattus norvegicus OX=10116 GN=Hbb PE=1 SV=1
Q01177	812	13	90458.9	29	99	0.00153809	0.4409	277.939	Plasminogen OS=Rattus norvegicus OX=10116 GN=Plg PE=2 SV=2
P05544	413	0	46230.1	21	83	0.00253531	0.5303	277.788	Serine protease inhibitor A3L OS=Rattus norvegicus OX=10116 GN=Serpina3l PE=1 SV=3
A0A0G2JXK5	413	0	46172.1	20	81	0.00247422	0.5109	274.848	Serine protease inhibitor A3N OS=Rattus norvegicus OX=10116 GN=LOC299282 PE=1 SV=1
P55314	589	16	66605.5	16	70	0.00149929	0.2852	272.238	Complement component C8 beta chain OS=Rattus norvegicus OX=10116 GN=C8b PE=2 SV=2
A9CME3	600	1	66973.5	25	118	0.00248104	0.375	271.933	Complement component 4 binding protein, alpha OS=Rattus norvegicus OX=10116 GN=C4bpa PE=4 SV=1
P20759	326	0	35904.7	14	90	0.0034828	0.3344	271.324	Ig gamma-1 chain C region OS=Rattus norvegicus OX=10116 PE=1 SV=1
Q3SYP8	118	0	12912.3	5	75	0.0080183	0.6356	268.427	Igh-6 protein (Fragment) OS=Rattus norvegicus OX=10116 GN=Igh-6 PE=2 SV=1
A0A096MIW4	79	0	8864.6	3	59	0.00942167	0.4051	266.97	Serpin family C member 1 (Fragment) OS=Rattus norvegicus OX=10116 GN=Serpinc1 PE=1 SV=1
Q6P6Q2	576	0	61769.7	19	94	0.00205877	0.2135	256.466	Keratin, type II cytoskeletal 5 OS=Rattus norvegicus OX=10116 GN=Krt5 PE=1 SV=1
F7FFV2	395	0	43969.9	19	94	0.00300216	0.3114	256.466	Keratin, type II cytoskeletal 5 (Fragment) OS=Rattus norvegicus OX=10116 GN=Krt5 PE=1 SV=2
A0A0G2K509	591	0	62734.7	18	90	0.00192114	0.2267	255.351	Keratin, type II cytoskeletal 5 OS=Rattus norvegicus OX=10116 GN=Krt5 PE=1 SV=1
contaminant_KERATIN17	590	3	62405.1	22	89	0.00190301	0.2627	247.826
Q7TPK2	2102	2	237092	30	91	0.00054615	0.1461	242.461	Ac2-120 OS=Rattus norvegicus OX=10116 GN=F5 PE=2 SV=1; Additional IDs concatenated into MaxParsimony group: A0A0G2K3W2, A0A0G2JXI1; Additional IDs concatenated into MaxParsimony group: A0A0G2K3W2, A0A0G2JXI1
P01836	106	0	11706.6	9	72	0.00856899	0.4434	240.146	Ig kappa chain C region, A allele OS=Rattus norvegicus OX=10116 PE=1 SV=1
P11517	147	0	15954.3	10	85	0.00729465	0.6054	235.439	Hemoglobin subunit beta-2 OS=Rattus norvegicus OX=10116 PE=1 SV=2
A0A1K0FUA6	147	0	15954.3	10	85	0.00729465	0.6054	235.439	Globin a2 OS=Rattus norvegicus OX=10116 GN=LOC689064 PE=3 SV=1
P20761	333	14	36456.2	17	69	0.00261401	0.6907	231.171	Ig gamma-2B chain C region OS=Rattus norvegicus OX=10116 GN=Igh-1a PE=1 SV=1
Q63041	1500	29	167001	29	79	0.000664414	0.2693	229.783	Alpha-1-macroglobulin OS=Rattus norvegicus OX=10116 GN=A1m PE=1 SV=1
contaminant_KERATIN21	357	1	39176.6	19	77	0.00272098	0.4622	228.68
G3V9J1	872	3	97260	20	75	0.00108505	0.258	224.525	Uncharacterized protein OS=Rattus norvegicus OX=10116 PE=1 SV=3
A0A0G2JTW9	147	0	15960.3	8	69	0.00592154	0.5986	201.891	Beta-globin OS=Rattus norvegicus OX=10116 GN=Hbb-b1 PE=1 SV=1
A0A0G2K3W2	1688	0	190851	26	74	0.000553047	0.1588	190.343	Coagulation factor V OS=Rattus norvegicus OX=10116 GN=F5 PE=1 SV=1
D3ZWD6	587	15	66212.3	15	56	0.00120352	0.3237	189.358	Complement C8 alpha chain OS=Rattus norvegicus OX=10116 GN=C8a PE=1 SV=1
Q4FZU2	552	0	59194.7	8	64	0.00146266	0.1304	188.086	Keratin, type II cytoskeletal 6A OS=Rattus norvegicus OX=10116 GN=Krt6a PE=1 SV=1
contaminant_KERATIN18	562	1	59767.2	15	56	0.00125706	0.2633	175.659
F1LRA5	1060	2	115725	12	59	0.000702181	0.1208	165.989	Proteoglycan 4 OS=Rattus norvegicus OX=10116 GN=Prg4 PE=1 SV=2
Q68FT8	491	1	54840	14	61	0.0015673	0.3483	165.813	RCG33981, isoform CRA_a OS=Rattus norvegicus OX=10116 GN=Serpinf2 PE=2 SV=1; Additional IDs concatenated into MaxParsimony group: F7FHF3; Additional IDs concatenated into MaxParsimony group: F7FHF3
A0A0G2JW69	484	0	52831.8	6	57	0.00148571	0.0661	162.477	Keratin 79 (Fragment) OS=Rattus norvegicus OX=10116 GN=Krt79 PE=1 SV=1
M0RAB8	100	10	11072.5	10	49	0.00618158	0.76	162.375	Ig-like domain-containing protein OS=Rattus norvegicus OX=10116 PE=4 SV=2
B0BNA0	445	2	49581.7	12	56	0.00158756	0.2517	161.859	Prg4 protein (Fragment) OS=Rattus norvegicus OX=10116 GN=Prg4 PE=2 SV=1
F7FHF3	554	0	62233.7	13	59	0.00134352	0.3087	161.678	Serpin family F member 2 OS=Rattus norvegicus OX=10116 GN=Serpinf2 PE=1 SV=1
A0A0H2UHR6	494	0	55430.7	14	56	0.00143009	0.2591	161.203	Coagulation factor X OS=Rattus norvegicus OX=10116 GN=F10 PE=1 SV=1; Additional IDs concatenated into MaxParsimony group: Q63207, Q63109; Additional IDs concatenated into MaxParsimony group: Q63207, Q63109
Q63207	482	0	54212.1	14	56	0.0014657	0.2656	161.203	Coagulation factor X OS=Rattus norvegicus OX=10116 GN=F10 PE=2 SV=1
contaminant_KERATIN05	471	2	51481.4	18	61	0.00163385	0.4034	160.831
A0A0H2UHH5	573	0	62112.1	7	54	0.00118889	0.1047	157.038	Keratin, type II cytoskeletal 75 OS=Rattus norvegicus OX=10116 GN=Krt75 PE=1 SV=1
Q6IG05	542	0	58972.6	7	54	0.00125689	0.1107	157.038	Keratin, type II cytoskeletal 75 OS=Rattus norvegicus OX=10116 GN=Krt75 PE=3 SV=2
D3ZUU6	202	6	22274.1	6	41	0.00256056	0.3911	150.344	C-type lectin domain family 3, member B OS=Rattus norvegicus OX=10116 GN=Clec3b PE=1 SV=1
Q5PQU1	430	2	47715.6	16	54	0.00158427	0.3651	145.4	Kininogen 1 OS=Rattus norvegicus OX=10116 GN=Kng2 PE=2 SV=1
G3V852	2541	12	269486	18	52	0.000258168	0.0874	145.134	RCG55135, isoform CRA_b OS=Rattus norvegicus OX=10116 GN=Tln1 PE=1 SV=1; Additional IDs concatenated into MaxParsimony group: D3ZA84, D4A3B0, Q498D4; Additional IDs concatenated into MaxParsimony group: D3ZA84, D4A3B0, Q498D4
F7EUK4	432	0	47879.5	15	63	0.00183975	0.3611	144.664	Kininogen-1 OS=Rattus norvegicus OX=10116 GN=Kng1 PE=1 SV=2
P08932	430	0	47655.4	15	63	0.00184831	0.3628	144.664	T-kininogen 2 OS=Rattus norvegicus OX=10116 PE=1 SV=2
P97535	456	9	50151.7	9	44	0.00121728	0.239	143.955	Phospholipase A1 member A OS=Rattus norvegicus OX=10116 GN=Pla1a PE=1 SV=1
A0A0H2UI19	603	1	66656.1	13	50	0.00104606	0.2255	143.426	Coagulation factor XII OS=Rattus norvegicus OX=10116 GN=F12 PE=1 SV=1; Additional IDs concatenated into MaxParsimony group: D3ZTE0; Additional IDs concatenated into MaxParsimony group: D3ZTE0
A0A0G2JVQ5	635	1	70470.4	15	62	0.00123175	0.2331	143.423	Kininogen-1 OS=Rattus norvegicus OX=10116 GN=Kng1 PE=1 SV=1
D3ZTE0	595	0	65782.7	12	49	0.00103892	0.2286	141.398	Coagulation factor XII OS=Rattus norvegicus OX=10116 GN=F12 PE=2 SV=1
Q63280	79	0	9371.6	7	48	0.00766509	0.5316	141.371	Keratin K5 (Fragment) OS=Rattus norvegicus OX=10116 GN=keratin K5 PE=3 SV=1
A0A0G2KAY3	398	0	44221	14	61	0.00193353	0.3719	141.326	Kininogen-1 OS=Rattus norvegicus OX=10116 GN=Kng1 PE=1 SV=1
A0A0G2KA54	635	0	70381.3	14	61	0.00121188	0.2331	141.326	Kininogen-1 OS=Rattus norvegicus OX=10116 GN=Kng1 PE=1 SV=1
P01048	430	0	47726.6	14	52	0.00152559	0.3279	140.858	T-kininogen 1 OS=Rattus norvegicus OX=10116 GN=Map1 PE=1 SV=2
D3ZFH5	826	8	92293.3	14	46	0.000702556	0.2833	139.935	Inter-alpha-trypsin inhibitor heavy chain 2 OS=Rattus norvegicus OX=10116 GN=Itih2 PE=1 SV=3; Additional IDs concatenated into MaxParsimony group: Q498S9; Additional IDs concatenated into MaxParsimony group: Q498S9
Q7TP84	759	1	85982.9	17	48	0.000797816	0.2569	136.979	Plasminogen OS=Rattus norvegicus OX=10116 GN=Plg PE=1 SV=1
Q63581	430	0	47569.5	13	50	0.00146691	0.3093	136.05	Uncharacterized protein OS=Rattus norvegicus OX=10116 PE=4 SV=1
Q91ZE7	849	1	94234.8	14	44	0.000653805	0.1873	135.989	Anion exchange protein OS=Rattus norvegicus OX=10116 PE=2 SV=1; Additional IDs concatenated into MaxParsimony group: F8WFT7, P23562, Q5U329; Additional IDs concatenated into MaxParsimony group: F8WFT7, P23562, Q5U329
Q62970	576	0	66702.5	16	49	0.00107319	0.349	133.639	Apolipoprotein B (Fragment) OS=Rattus norvegicus OX=10116 GN=apoB PE=4 SV=1
P23562	927	0	103089	13	42	0.000571574	0.1715	132.82	Band 3 anion transport protein OS=Rattus norvegicus OX=10116 GN=Slc4a1 PE=1 SV=3
Q5U329	850	0	94276.9	13	42	0.000623352	0.1871	132.82	Anion exchange protein OS=Rattus norvegicus OX=10116 GN=Slc4a1 PE=1 SV=1
F8WFT7	928	0	103160	13	42	0.000570958	0.1713	132.82	Anion exchange protein OS=Rattus norvegicus OX=10116 GN=Slc4a1 PE=1 SV=1
contaminant_KERATIN08	469	5	50449.7	15	51	0.00137183	0.3156	130.56
A0A3B0J380	257	1	27165.8	5	33	0.00161988	0.2062	126.388	Adiponectin c OS=Rattus norvegicus OX=10116 GN=Adic PE=4 SV=1; Additional IDs concatenated into MaxParsimony group: P31720; Additional IDs concatenated into MaxParsimony group: P31720
D4ACR1	121	5	13686.9	7	37	0.00385762	0.4959	125.671	Ig-like domain-containing protein OS=Rattus norvegicus OX=10116 PE=1 SV=2; Additional IDs concatenated into MaxParsimony group: A0A0G2K828; Additional IDs concatenated into MaxParsimony group: A0A0G2K828
A0A0G2JXI1	1833	0	206196	15	41	0.000282179	0.1015	124.235	Coagulation factor V OS=Rattus norvegicus OX=10116 GN=F5 PE=1 SV=1
P06765	105	6	11261.3	6	40	0.00480589	0.381	124.105	Platelet factor 4 OS=Rattus norvegicus OX=10116 GN=Pf4 PE=1 SV=1
G3V908	532	0	57555.8	4	41	0.000972244	0.0733	123.369	Type II keratin Kb15 OS=Rattus norvegicus OX=10116 GN=Kb15 PE=2 SV=2
A0A0G2JVA8	537	0	58042.1	4	41	0.000963192	0.0726	123.369	Type II keratin Kb15 OS=Rattus norvegicus OX=10116 GN=Kb15 PE=3 SV=1
D3ZBS2	887	1	98987.7	14	42	0.00059735	0.2176	121.589	Inter-alpha-trypsin inhibitor heavy chain H3 OS=Rattus norvegicus OX=10116 GN=Itih3 PE=1 SV=3; Additional IDs concatenated into MaxParsimony group: Q63416; Additional IDs concatenated into MaxParsimony group: Q63416
P31720	245	0	25883.2	4	31	0.00159624	0.2163	121.396	Complement C1q subcomponent subunit A OS=Rattus norvegicus OX=10116 GN=C1qa PE=1 SV=2
Q99ME0	111	8	12133.6	8	40	0.00454611	0.5315	120.353	CXC chemokine RTCK1 OS=Rattus norvegicus OX=10116 GN=Ppbp PE=1 SV=1
Q6IFV1	485	0	52632.9	10	44	0.0011445	0.1979	120.273	Keratin, type I cytoskeletal 14 OS=Rattus norvegicus OX=10116 GN=Krt14 PE=2 SV=1
Q63416	887	0	99017.6	13	41	0.000583127	0.2176	118.523	Inter-alpha-trypsin inhibitor heavy chain H3 OS=Rattus norvegicus OX=10116 GN=Itih3 PE=2 SV=1
Q6IMF3	625	0	64773.1	8	42	0.000847759	0.072	116.757	Keratin, type II cytoskeletal 1 OS=Rattus norvegicus OX=10116 GN=Krt1 PE=2 SV=1
A0A0G2JST3	625	0	64699.1	8	42	0.000847759	0.072	116.757	Keratin, type II cytoskeletal 1 OS=Rattus norvegicus OX=10116 GN=Krt1 PE=1 SV=1
A0A0G2JUG1	538	0	57405.7	3	38	0.000891055	0.0558	116.093	IF rod domain-containing protein OS=Rattus norvegicus OX=10116 PE=3 SV=1
Q63052	989	1	113217	21	42	0.000535743	0.2851	113.786	Apolipoprotein B (Fragment) OS=Rattus norvegicus OX=10116 GN=apoB PE=2 SV=1
A2VCV7	685	2	75506.9	13	35	0.000644586	0.2307	110.448	Mannan-binding lectin serine peptidase 2 OS=Rattus norvegicus OX=10116 GN=Masp2 PE=1 SV=1; Additional IDs concatenated into MaxParsimony group: Q9JJS8, A0A0G2K392; Additional IDs concatenated into MaxParsimony group: Q9JJS8, A0A0G2K392
Q7TP24	980	2	107365	16	37	0.000476298	0.1408	110.095	Ba1-667 OS=Rattus norvegicus OX=10116 PE=2 SV=1; Additional IDs concatenated into MaxParsimony group: Q7TMC7, A0A0G2QC06, P12346, Q64599; Additional IDs concatenated into MaxParsimony group: Q7TMC7, A0A0G2QC06, P12346, Q64599
Q64721	127	0	14733.7	7	34	0.00337737	0.5669	108.388	Apolipoprotein BL (Fragment) OS=Rattus norvegicus OX=10116 GN=apo B PE=2 SV=1
Q9JJS8	685	0	75600	11	33	0.000607752	0.2307	107.204	Mannan-binding lectin serine protease 2 OS=Rattus norvegicus OX=10116 GN=Masp2 PE=1 SV=2
A0A0G2QC06	979	0	107322	14	35	0.000451012	0.141	105.856	Serotransferrin OS=Rattus norvegicus OX=10116 GN=Tf PE=1 SV=1
P12346	698	0	76327.6	14	35	0.00063258	0.1977	105.856	Serotransferrin OS=Rattus norvegicus OX=10116 GN=Tf PE=1 SV=3
Q7TMC7	979	0	107325	14	35	0.000451012	0.141	105.856	Ab2-417 OS=Rattus norvegicus OX=10116 PE=2 SV=1
P01946	142	0	15300.8	8	38	0.00337597	0.5845	104.67	Hemoglobin subunit alpha-1/2 OS=Rattus norvegicus OX=10116 GN=Hba1 PE=1 SV=3
A0A0G2JSV6	142	0	15256.8	8	38	0.00337597	0.5845	104.67	Globin c2 OS=Rattus norvegicus OX=10116 GN=Hba-a2 PE=1 SV=1; Additional IDs concatenated into MaxParsimony group: B1H216, P01946, Q63910, G3V8R3; Additional IDs concatenated into MaxParsimony group: B1H216, P01946, Q63910, G3V8R3
B1H216	142	0	15300.8	8	38	0.00337597	0.5845	104.67	Globin c3 OS=Rattus norvegicus OX=10116 GN=Hba-a1 PE=2 SV=1
P00762	246	4	25924.7	4	30	0.00153847	0.0813	100.23	Anionic trypsin-1 OS=Rattus norvegicus OX=10116 GN=Prss1 PE=1 SV=1
P20059	460	14	51300.3	14	42	0.00115185	0.3565	99.3117	Hemopexin OS=Rattus norvegicus OX=10116 GN=Hpx PE=1 SV=3
P48032	211	0	24191.8	10	41	0.00245135	0.4123	98.762	Metalloproteinase inhibitor 3 OS=Rattus norvegicus OX=10116 GN=Timp3 PE=2 SV=1; Additional IDs concatenated into MaxParsimony group: Q4V8L0
Q4V8L0	211	0	24191.8	10	41	0.00245135	0.4123	98.762	Metalloproteinase inhibitor 3 OS=Rattus norvegicus OX=10116 GN=Timp3 PE=1 SV=1; Additional IDs concatenated into MaxParsimony group: P48032
contaminant_INT-STD1	607	12	69207.4	12	37	0.000768982	0.1631	96.0261	BSA
P04797	333	0	35787.2	6	26	0.000984991	0.2252	94.6867	Glyceraldehyde-3-phosphate dehydrogenase OS=Rattus norvegicus OX=10116 GN=Gapdh PE=1 SV=3; Additional IDs concatenated into MaxParsimony group: M0R660, M0R590, D3ZGY4, E9PTN6, Q0QEU1, A0A0G2K8S2, F1M4G6, D3ZEN2, B1WBQ8, Q9ESV6, A0A0G2JYY8, Q498M9, E9PTV9, A0A0G2K7M1, F1LUV3, D3ZWV2, D3ZME3, F1M2N4, F1LUI2
M0R660	333	0	35742.1	6	26	0.000984991	0.2252	94.6867	Glyceraldehyde-3-phosphate dehydrogenase OS=Rattus norvegicus OX=10116 PE=1 SV=1; Additional IDs concatenated into MaxParsimony group: P04797, M0R590, D3ZGY4, E9PTN6, Q0QEU1, A0A0G2K8S2, F1M4G6, D3ZEN2, Q9ESV6, B1WBQ8, Q498M9, A0A0G2JYY8, E9PTV9, A0A0G2K7M1, F1LUV3, D3ZWV2, D3ZME3, F1M2N4, F1LUI2
M0R590	333	0	35773.1	6	26	0.000984991	0.2252	94.6867	Glyceraldehyde-3-phosphate dehydrogenase OS=Rattus norvegicus OX=10116 GN=LOC108351137 PE=3 SV=1
D3ZGY4	333	0	35782.1	5	24	0.000909222	0.2012	91.3733	Glyceraldehyde-3-phosphate dehydrogenase OS=Rattus norvegicus OX=10116 PE=1 SV=1
P55159	355	4	39315.1	4	26	0.000923949	0.2	87.932	Serum paraoxonase/arylesterase 1 OS=Rattus norvegicus OX=10116 GN=Pon1 PE=1 SV=3
P19999	238	11	25273.7	11	30	0.00159018	0.3613	87.1159	Mannose-binding protein A OS=Rattus norvegicus OX=10116 GN=Mbl1 PE=1 SV=1
P20767	104	7	11292.6	7	28	0.00339647	0.7692	87.0005	Ig lambda-2 chain C region OS=Rattus norvegicus OX=10116 PE=4 SV=1
Q62975	436	8	50193.8	8	31	0.000896971	0.2041	86.7952	Protein Z-dependent protease inhibitor OS=Rattus norvegicus OX=10116 GN=Serpina10 PE=2 SV=2
P31721	253	0	26554.8	7	30	0.0014959	0.4111	86.3811	Complement C1q subcomponent subunit B OS=Rattus norvegicus OX=10116 GN=C1qb PE=1 SV=2; Additional IDs concatenated into MaxParsimony group: G3V7N9
G3V7N9	253	0	26612.8	7	30	0.0014959	0.4111	86.3811	Adiponectin a OS=Rattus norvegicus OX=10116 GN=C1qb PE=1 SV=1; Additional IDs concatenated into MaxParsimony group: P31721
A0A0G2JXJ9	442	0	47363.8	7	33	0.000941878	0.1154	84.8472	Keratin, type I cytoskeletal 14 OS=Rattus norvegicus OX=10116 GN=Krt14 PE=1 SV=1
Q62669	147	1	15994.2	7	34	0.00291786	0.4898	84.2192	Beta-globin OS=Rattus norvegicus OX=10116 GN=LOC103694855 PE=1 SV=1
A0A0G2JZQ9	579	0	62028.8	5	30	0.000653651	0.038	82.6115	Keratin, type II cytoskeletal 1b OS=Rattus norvegicus OX=10116 GN=Krt77 PE=3 SV=1
Q6IG01	519	0	57201.6	5	30	0.000729217	0.0424	82.6115	Keratin, type II cytoskeletal 1b OS=Rattus norvegicus OX=10116 GN=Krt77 PE=3 SV=1
Q63011	146	0	15878.2	6	33	0.00285144	0.4932	82.0484	Zero beta-globin (Fragment) OS=Rattus norvegicus OX=10116 PE=3 SV=1
Q6PDU6	147	0	16009.2	6	33	0.00283204	0.4898	82.0484	Beta-glo OS=Rattus norvegicus OX=10116 GN=Hbb-b1 PE=2 SV=1
Q63109	161	0	18018.8	7	26	0.00203728	0.472	81.4782	Coagulation factor X (Fragment) OS=Rattus norvegicus OX=10116 PE=3 SV=1
Q0QEU1	238	0	25501.2	4	21	0.00111313	0.2227	81.3294	Glyceraldehyde-3-phosphate dehydrogenase (Fragment) OS=Rattus norvegicus OX=10116 GN=GAPDH PE=2 SV=1
Q5I0M1	345	3	38413.7	11	30	0.001097	0.2232	80.4124	Apolipoprotein H OS=Rattus norvegicus OX=10116 GN=Apoh PE=1 SV=1; Additional IDs concatenated into MaxParsimony group: P26644, Q3T940; Additional IDs concatenated into MaxParsimony group: P26644, Q3T940
A0A0G2JWX4	684	0	69045.2	9	31	0.000571753	0.0906	79.6441	Keratin, type II cytoskeletal 2 epidermal OS=Rattus norvegicus OX=10116 GN=Krt2 PE=1 SV=1
Q6IG02	685	0	69067.2	9	31	0.000570919	0.0905	79.6441	Keratin, type II cytoskeletal 2 epidermal OS=Rattus norvegicus OX=10116 GN=Krt2 PE=3 SV=1
Q6IRS6	393	0	43123.7	7	24	0.00077041	0.1578	79.4205	Fetub protein OS=Rattus norvegicus OX=10116 GN=Fetub PE=1 SV=1; Additional IDs concatenated into MaxParsimony group: Q9QX79; Additional IDs concatenated into MaxParsimony group: Q9QX79
Q9QX79	378	0	41517.9	7	24	0.000800982	0.164	79.4205	Fetuin-B OS=Rattus norvegicus OX=10116 GN=Fetub PE=2 SV=2
Q91WX0	699	3	78240.1	14	32	0.000577532	0.2403	77.5815	Complement factor H-related protein OS=Rattus norvegicus OX=10116 PE=2 SV=2; Additional IDs concatenated into MaxParsimony group: G3V7P5, A0A0G2K975, G3V9R2, F1M983, Q5XJW6, Q5FVP9; Additional IDs concatenated into MaxParsimony group: G3V7P5, A0A0G2K975, G3V9R2, F1M983, Q5XJW6, Q5FVP9
A0A0G2JVX7	392	0	44316.7	10	30	0.000965469	0.3036	76.6328	Apolipoprotein A-IV OS=Rattus norvegicus OX=10116 GN=Apoa4 PE=1 SV=1; Additional IDs concatenated into MaxParsimony group: P02651; Additional IDs concatenated into MaxParsimony group: P02651
P02651	391	0	44410.7	10	30	0.000967938	0.3043	76.6328	Apolipoprotein A-IV OS=Rattus norvegicus OX=10116 GN=Apoa4 PE=1 SV=2
A0A0G2K8K3	511	0	57968.4	9	29	0.000715946	0.2153	76.0767	Heparin cofactor 2 OS=Rattus norvegicus OX=10116 GN=Serpind1 PE=1 SV=1; Additional IDs concatenated into MaxParsimony group: Q64268; Additional IDs concatenated into MaxParsimony group: Q64268
Q64268	479	0	54498.9	9	29	0.000763775	0.2296	76.0767	Heparin cofactor 2 OS=Rattus norvegicus OX=10116 GN=Serpind1 PE=1 SV=1
A0A0G2K151	359	0	41155.8	9	24	0.000843373	0.3036	75.909	Apolipoprotein E OS=Rattus norvegicus OX=10116 GN=Apoe PE=1 SV=1; Additional IDs concatenated into MaxParsimony group: Q65ZS7, P02650, Q6PAH0; Additional IDs concatenated into MaxParsimony group: Q65ZS7, P02650, Q6PAH0
Q65ZS7	336	0	38283.7	9	24	0.000901104	0.3244	75.909	Rat apolipoprotein E protein OS=Rattus norvegicus OX=10116 PE=3 SV=1
P02650	312	0	35713.3	9	24	0.00097042	0.3494	75.909	Apolipoprotein E OS=Rattus norvegicus OX=10116 GN=Apoe PE=1 SV=2
Q6PAH0	312	0	35723.3	9	24	0.00097042	0.3494	75.909	Apolipoprotein E OS=Rattus norvegicus OX=10116 GN=Apoe PE=2 SV=1
contaminant_KERATIN12	431	0	47927	10	32	0.000936647	0.2111	75.4194
B5DEH7	707	0	80355.2	12	27	0.000481779	0.1924	75.4131	C1r protein OS=Rattus norvegicus OX=10116 GN=C1r PE=1 SV=1; Additional IDs concatenated into MaxParsimony group: D4A1T6, Q4G030; Additional IDs concatenated into MaxParsimony group: D4A1T6, Q4G030
D4A1T6	660	0	75242.5	11	26	0.000496973	0.1879	73.2956	Complement C1r OS=Rattus norvegicus OX=10116 GN=C1r PE=1 SV=3
Q6IFU8	433	0	48075	10	31	0.000903185	0.2194	73.1313	Keratin, type I cytoskeletal 17 OS=Rattus norvegicus OX=10116 GN=Krt17 PE=1 SV=1
A0A0G2K9Q9	447	0	49525.5	9	30	0.000846675	0.1834	70.8348	Keratin, type I cytoskeletal 17 OS=Rattus norvegicus OX=10116 GN=Krt17 PE=1 SV=1
Q62670	147	0	15951.2	5	30	0.00257458	0.3333	70.4887	0 beta-2 globin OS=Rattus norvegicus OX=10116 GN=0 beta-2 globin PE=3 SV=1
contaminant_KERATIN07	473	1	50864.8	8	29	0.000773464	0.1649	69.325
M0RA79	99	5	10934.4	6	22	0.00280344	0.6162	68.6362	Ig-like domain-containing protein OS=Rattus norvegicus OX=10116 PE=1 SV=1
P62632	463	4	50404.3	7	24	0.000653933	0.2052	64.8225	Elongation factor 1-alpha 2 OS=Rattus norvegicus OX=10116 GN=Eef1a2 PE=1 SV=1; Additional IDs concatenated into MaxParsimony group: M0R757, F1M6C2; Additional IDs concatenated into MaxParsimony group: M0R757, F1M6C2
Q68FR2	507	8	55066.7	8	18	0.000447886	0.2051	63.8448	Bridging integrator 2 OS=Rattus norvegicus OX=10116 GN=Bin2 PE=1 SV=1
D4A2G6	1172	0	129626	2	20	0.000215281	0.0196	62.1721	Thrombospondin 2 OS=Rattus norvegicus OX=10116 GN=Thbs2 PE=4 SV=2
A0A3B0IYY4	268	0	28168.9	6	21	0.000988525	0.2873	61.4277	Adiponectin b OS=Rattus norvegicus OX=10116 GN=Adib PE=4 SV=1; Additional IDs concatenated into MaxParsimony group: A0A0H2UHK1, P31722; Additional IDs concatenated into MaxParsimony group: A0A0H2UHK1, P31722
A0A0H2UHK1	248	0	26051.9	6	21	0.00106824	0.3105	61.4277	Complement C1q subcomponent subunit C OS=Rattus norvegicus OX=10116 GN=C1qc PE=1 SV=1
P31722	245	0	25651.7	6	21	0.00108133	0.3143	61.4277	Complement C1q subcomponent subunit C OS=Rattus norvegicus OX=10116 GN=C1qc PE=1 SV=2
F1M8F5	410	0	46310	7	19	0.000584619	0.1195	61.4098	Similar to BC049975 protein OS=Rattus norvegicus OX=10116 GN=LOC100909605 PE=3 SV=3
M0R5R0	675	1	74545.6	8	24	0.00044855	0.1037	61.2687	Protein S (Alpha), isoform CRA_b OS=Rattus norvegicus OX=10116 GN=Pros1 PE=1 SV=1; Additional IDs concatenated into MaxParsimony group: P53813, Q62628; Additional IDs concatenated into MaxParsimony group: P53813, Q62628
P63259	375	0	41747.8	10	24	0.00080739	0.328	60.9214	Actin, cytoplasmic 2 OS=Rattus norvegicus OX=10116 GN=Actg1 PE=1 SV=1
A0A0G2K3K2	378	0	42040.9	10	24	0.000800982	0.3254	60.9214	Actin, cytoplasmic 1 OS=Rattus norvegicus OX=10116 GN=Actb PE=1 SV=1; Additional IDs concatenated into MaxParsimony group: P60711, P63259, A1Z0K8, B0BMT0, P62738, P68035, P68136, P63269, A0A0G2K4M6, D3ZRN3, A0A068F1Y2, Q99NC6, Q9JLX9, Q63030; Additional IDs concatenated into MaxParsimony group: P63259, P60711, A1Z0K8, P68136, P68035, P62738, B0BMT0, A0A0G2K4M6, P63269, D3ZRN3, A0A068F1Y2, Q99NC6,…
P60711	375	0	41691.7	10	24	0.00080739	0.328	60.9214	Actin, cytoplasmic 1 OS=Rattus norvegicus OX=10116 GN=Actb PE=1 SV=1
Q7TPA5	422	5	46976.6	5	22	0.000657678	0.1611	60.6154	Serpin A11 OS=Rattus norvegicus OX=10116 GN=Serpina11 PE=2 SV=2
Q4G047	437	0	50940.1	11	22	0.000635103	0.3341	60.0998	Apob protein (Fragment) OS=Rattus norvegicus OX=10116 GN=Apob PE=2 SV=1
P53813	675	0	74560.6	7	23	0.00042986	0.1037	60.0546	Vitamin K-dependent protein S OS=Rattus norvegicus OX=10116 GN=Pros1 PE=2 SV=1
G3V7P5	699	0	78227.1	10	24	0.000433149	0.1474	59.7094	RCG46174 OS=Rattus norvegicus OX=10116 GN=RGD1564614 PE=1 SV=1
Q9EQV8	457	4	51930.1	4	17	0.000469284	0.1291	58.4711	Carboxypeptidase N catalytic chain OS=Rattus norvegicus OX=10116 GN=Cpn1 PE=2 SV=1
contaminant_KERATIN14	638	0	65812.1	7	24	0.000474563	0.0596	58.2845
A0A0G2JWB6	1475	0	165311	9	22	0.000188163	0.0881	57.6371	Peroxidasin OS=Rattus norvegicus OX=10116 GN=Pxdn PE=4 SV=1; Additional IDs concatenated into MaxParsimony group: A0A0G2KAH2; Additional IDs concatenated into MaxParsimony group: A0A0G2KAH2
A0A0G2KAH2	1237	0	138062	9	22	0.000224366	0.1051	57.6371	Peroxidasin OS=Rattus norvegicus OX=10116 GN=Pxdn PE=4 SV=1
contaminant_KERATIN15	629	0	64453.6	6	23	0.000461297	0.0477	56.5452
Q10758	483	0	53967.3	5	23	0.000600736	0.0393	54.8105	Keratin, type II cytoskeletal 8 OS=Rattus norvegicus OX=10116 GN=Krt8 PE=1 SV=3
A0A1B0GWS5	1350	0	150911	4	14	0.000130827	0.0474	54.2877	Complement C5 (Fragment) OS=Rattus norvegicus OX=10116 GN=C5 PE=1 SV=1
A0A096P6L9	1681	0	188943	4	14	0.000105066	0.0381	54.2877	Complement C5 OS=Rattus norvegicus OX=10116 GN=C5 PE=1 SV=2; Additional IDs concatenated into MaxParsimony group: A0A1B0GWS5; Additional IDs concatenated into MaxParsimony group: A0A1B0GWS5
contaminant_KERATIN06	456	0	49119	6	24	0.000663972	0.1053	53.7619
Q71RP1	536	1	60423.6	7	19	0.00044719	0.1399	53.6951	Heparanase OS=Rattus norvegicus OX=10116 GN=Hpse PE=2 SV=1; Additional IDs concatenated into MaxParsimony group: F1M581; Additional IDs concatenated into MaxParsimony group: F1M581
F1M3X3	117	3	12987.6	5	18	0.00194084	0.4188	53.6469	Ig-like domain-containing protein OS=Rattus norvegicus OX=10116 PE=4 SV=2; Additional IDs concatenated into MaxParsimony group: M0R4X3; Additional IDs concatenated into MaxParsimony group: M0R4X3
D3ZPI8	164	6	18384.4	6	16	0.00123078	0.5366	53.0216	Complement C8 gamma chain OS=Rattus norvegicus OX=10116 GN=C8g PE=1 SV=1
P09005	214	0	24184.7	8	20	0.00117902	0.2617	50.6483	Serine protease inhibitor 2.1 (Fragment) OS=Rattus norvegicus OX=10116 PE=2 SV=1
Q64240	349	7	38808	7	16	0.000578359	0.2178	49.942	Protein AMBP OS=Rattus norvegicus OX=10116 GN=Ambp PE=1 SV=1
A0A0U1RRP9	1115	1	123874	6	16	0.000181029	0.0619	49.0387	Complement factor B OS=Rattus norvegicus OX=10116 GN=Cfb PE=1 SV=1; Additional IDs concatenated into MaxParsimony group: Q7TP05, G3V615, Q6MG74; Additional IDs concatenated into MaxParsimony group: Q7TP05, G3V615, Q6MG74
Q3T940	266	0	29356.4	5	16	0.000758825	0.218	48.7965	Apolipoprotein H (Fragment) OS=Rattus norvegicus OX=10116 GN=Apoh PE=2 SV=1
Q6IFV3	447	0	48822.1	7	25	0.000705563	0.1029	48.7808	Keratin, type I cytoskeletal 15 OS=Rattus norvegicus OX=10116 GN=Krt15 PE=1 SV=1
Q6IFV0	491	0	52545.6	5	19	0.000488175	0.0774	48.5495	Type I keratin KA11 OS=Rattus norvegicus OX=10116 GN=Ka11 PE=2 SV=1
Q6IFU9	463	0	50727.7	5	19	0.000517697	0.0821	48.5495	Keratin 16 OS=Rattus norvegicus OX=10116 GN=Krt16 PE=1 SV=1
A0A0G2JY31	411	0	46074.5	8	21	0.000644586	0.1873	48.1713	Alpha-1-antiproteinase OS=Rattus norvegicus OX=10116 GN=Serpina1 PE=1 SV=1
P17475	411	0	46088.5	8	21	0.000644586	0.1873	48.1713	Alpha-1-antiproteinase OS=Rattus norvegicus OX=10116 GN=Serpina1 PE=1 SV=2
A0A0G2JZ73	415	0	46586.8	8	21	0.000638373	0.1855	48.1713	Alpha-1-antiproteinase OS=Rattus norvegicus OX=10116 GN=Serpina1 PE=1 SV=1; Additional IDs concatenated into MaxParsimony group: A0A0G2JY31, P17475; Additional IDs concatenated into MaxParsimony group: A0A0G2JY31, P17475
contaminant_KERATIN20	483	0	53697.1	4	20	0.000522379	0.0207	48.1233
F1M581	535	0	60820.8	6	16	0.000377285	0.1215	47.8268	Heparanase OS=Rattus norvegicus OX=10116 GN=Hpse PE=4 SV=3
F7FMY6	482	0	53962.2	6	18	0.000471117	0.1307	47.2188	Protein C, isoform CRA_b OS=Rattus norvegicus OX=10116 GN=Proc PE=1 SV=1; Additional IDs concatenated into MaxParsimony group: Q68FY8, P31394; Additional IDs concatenated into MaxParsimony group: Q68FY8, P31394
P31394	461	0	51860.3	6	18	0.000492578	0.1367	47.2188	Vitamin K-dependent protein C OS=Rattus norvegicus OX=10116 GN=Proc PE=2 SV=1
Q68FY8	461	0	51775.2	6	18	0.000492578	0.1367	47.2188	Protein C OS=Rattus norvegicus OX=10116 GN=Proc PE=2 SV=1
A1Z0K8	283	0	31708.9	7	18	0.000802397	0.3145	47.0591	Beta-actin (Fragment) OS=Rattus norvegicus OX=10116 PE=2 SV=1
Q6MG74	761	0	85048.6	5	14	0.000232085	0.0907	46.4139	B-factor, properdin OS=Rattus norvegicus OX=10116 GN=Cfb PE=2 SV=1
Q7TP05	1116	0	123942	5	14	0.000158258	0.0618	46.4139	Complement factor B OS=Rattus norvegicus OX=10116 GN=Cfb PE=1 SV=1
G3V615	763	0	85280.7	5	14	0.000231476	0.0904	46.4139	Complement factor B OS=Rattus norvegicus OX=10116 GN=Cfb PE=1 SV=1
Q6IG00	536	0	57613	5	18	0.000423654	0.0541	45.7647	Keratin, type II cytoskeletal 4 OS=Rattus norvegicus OX=10116 GN=Krt4 PE=3 SV=1
A0A0G2K6P7	526	0	56505.4	5	18	0.000431708	0.0551	45.7647	Keratin, type II cytoskeletal 4 OS=Rattus norvegicus OX=10116 GN=Krt4 PE=3 SV=1
Q6IFU7	452	0	50163.9	6	18	0.000502386	0.1527	44.2789	Keratin, type I cytoskeletal 42 OS=Rattus norvegicus OX=10116 GN=Krt42 PE=3 SV=1
A0A0H2UHA1	704	1	80043.5	7	15	0.000268795	0.1293	43.3004	Mannan-binding lectin serine protease 1 OS=Rattus norvegicus OX=10116 GN=Masp1 PE=1 SV=1; Additional IDs concatenated into MaxParsimony group: Q8CHN8, Q8CG43; Additional IDs concatenated into MaxParsimony group: Q8CHN8, Q8CG43
A0A0G2K975	764	0	85734.8	9	20	0.000330248	0.1099	43.0631	Similar to complement factor H-related protein OS=Rattus norvegicus OX=10116 GN=RGD1564614 PE=1 SV=1
O09016	126	1	14065.8	4	14	0.00140172	0.2937	42.6363	K-kininogen (Fragment) OS=Rattus norvegicus OX=10116 GN=Kngk PE=4 SV=1
H6X2V7	230	0	25431.7	3	15	0.000822748	0.1391	41.7227	Pentaxin OS=Rattus norvegicus OX=10116 GN=crp PE=3 SV=1
H6X2W7	230	0	25407.7	3	15	0.000822748	0.1391	41.7227	Pentaxin OS=Rattus norvegicus OX=10116 GN=crp PE=3 SV=1
H6X2V9	230	0	25445.8	3	15	0.000822748	0.1391	41.7227	Pentaxin OS=Rattus norvegicus OX=10116 GN=crp PE=3 SV=1
H6X2X0	230	0	25407.7	3	15	0.000822748	0.1391	41.7227	Pentaxin OS=Rattus norvegicus OX=10116 GN=crp PE=3 SV=1
P48199	230	0	25433.7	3	15	0.000822748	0.1391	41.7227	C-reactive protein OS=Rattus norvegicus OX=10116 GN=Crp PE=1 SV=1
H6X2W4	230	0	25401.7	3	15	0.000822748	0.1391	41.7227	Pentaxin OS=Rattus norvegicus OX=10116 GN=crp PE=3 SV=1
H6X2W5	230	0	25433.7	3	15	0.000822748	0.1391	41.7227	Pentaxin OS=Rattus norvegicus OX=10116 GN=Crp PE=3 SV=1
A0A0G2K8V5	1017	0	116413	3	15	0.000186069	0.0315	41.7227	C-reactive protein OS=Rattus norvegicus OX=10116 GN=Crp PE=1 SV=1; Additional IDs concatenated into MaxParsimony group: Q7TMA9, H6X2W5, H6X2V8, H6X2W2, H6X2V9, H6X2V7, H6X2X0, H6X2W1, H6X2W6, H6X2V4, H6X2W7, H6X2V2, H6X2W4, P48199, H6X2W3, H6X2V3, H6X2W0; Additional IDs concatenated into MaxParsimony group: Q7TMA9, H6X2V7, H6X2V2, H6X2W7, H6X2V4, P48199, H6X2W6, H6X2X0, H6X2W2, H6X2W3, H6X2W1, H6…
H6X2V4	230	0	25467.7	3	15	0.000822748	0.1391	41.7227	Pentaxin OS=Rattus norvegicus OX=10116 GN=crp PE=3 SV=1
H6X2V8	230	0	25463.7	3	15	0.000822748	0.1391	41.7227	Pentaxin OS=Rattus norvegicus OX=10116 GN=crp PE=3 SV=1
H6X2V2	230	0	25341.7	3	15	0.000822748	0.1391	41.7227	Pentaxin OS=Rattus norvegicus OX=10116 GN=crp PE=3 SV=1
Q7TMA9	1015	0	116369	3	15	0.000186435	0.0315	41.7227	Aa1249 OS=Rattus norvegicus OX=10116 PE=2 SV=1
H6X2W2	230	0	25409.6	3	15	0.000822748	0.1391	41.7227	Pentaxin OS=Rattus norvegicus OX=10116 GN=crp PE=3 SV=1
H6X2W3	230	0	25417.7	3	15	0.000822748	0.1391	41.7227	Pentaxin OS=Rattus norvegicus OX=10116 GN=crp PE=3 SV=1
H6X2W1	230	0	25408.6	3	15	0.000822748	0.1391	41.7227	Pentaxin OS=Rattus norvegicus OX=10116 GN=crp PE=3 SV=1
H6X2W6	230	0	25429.7	3	15	0.000822748	0.1391	41.7227	Pentaxin OS=Rattus norvegicus OX=10116 GN=crp PE=3 SV=1
Q62628	346	0	38055.4	5	15	0.000546913	0.1561	41.3882	Protein S (Fragment) OS=Rattus norvegicus OX=10116 PE=2 SV=1
Q8CHN8	704	0	80027.5	6	14	0.000250876	0.1293	41.2826	Mannan-binding lectin serine protease 1 OS=Rattus norvegicus OX=10116 GN=Masp1 PE=1 SV=2
P26644	297	0	33157.1	5	17	0.000722097	0.1347	40.9222	Beta-2-glycoprotein 1 OS=Rattus norvegicus OX=10116 GN=Apoh PE=2 SV=2
F1LSB2	497	1	57361.2	7	14	0.000355365	0.1449	39.3495	Angiopoietin 1, isoform CRA_a OS=Rattus norvegicus OX=10116 GN=Angpt1 PE=4 SV=2; Additional IDs concatenated into MaxParsimony group: O35460, Q548N6, Q91Z91; Additional IDs concatenated into MaxParsimony group: O35460, Q548N6, Q91Z91
Q6IFV4	438	0	47681.3	3	16	0.000460839	0.0685	38.7859	Keratin, type I cytoskeletal 13 OS=Rattus norvegicus OX=10116 GN=Krt13 PE=3 SV=1
A0A0G2K392	184	0	20817.1	5	12	0.000822748	0.4239	38.2555	Mannan-binding lectin serine protease 2 OS=Rattus norvegicus OX=10116 GN=Masp2 PE=4 SV=1
Q6IFZ5	581	0	61702.5	4	15	0.0003257	0.0499	38.0571	Keratin 76 OS=Rattus norvegicus OX=10116 GN=Krt76 PE=2 SV=1
A0A0G2JX40	143	0	16046.2	2	9	0.00079398	0.2378	37.1389	Insulin-like growth factor I OS=Rattus norvegicus OX=10116 GN=Igf1 PE=1 SV=1
Q5RK13	127	0	14079	2	9	0.000894009	0.2677	37.1389	Igf1 protein OS=Rattus norvegicus OX=10116 GN=Igf1 PE=2 SV=2
P08025	153	0	17049.6	2	9	0.000742086	0.2222	37.1389	Insulin-like growth factor I OS=Rattus norvegicus OX=10116 GN=Igf1 PE=1 SV=3
F8WFZ5	159	0	17929.3	2	9	0.000714083	0.2138	37.1389	Insulin-like growth factor 1, isoform CRA_b OS=Rattus norvegicus OX=10116 GN=Igf1 PE=1 SV=2; Additional IDs concatenated into MaxParsimony group: P08025, A0A0G2JX40, Q5RK13; Additional IDs concatenated into MaxParsimony group: P08025, A0A0G2JX40, Q5RK13
P62630	462	0	50064.1	4	15	0.000409593	0.0931	37.0248	Elongation factor 1-alpha 1 OS=Rattus norvegicus OX=10116 GN=Eef1a1 PE=2 SV=1
M0R757	462	0	50058.1	4	15	0.000409593	0.0931	37.0248	Elongation factor 1-alpha OS=Rattus norvegicus OX=10116 GN=LOC100360413 PE=3 SV=1
A0A0G2JW41	118	1	13004.3	2	10	0.00106911	0.2627	36.5398	Ig-like domain-containing protein OS=Rattus norvegicus OX=10116 PE=1 SV=1
Q6IG03	553	0	60331.4	2	11	0.00025094	0.0362	36.2275	Keratin, type II cytoskeletal 73 OS=Rattus norvegicus OX=10116 GN=Krt73 PE=1 SV=1
A0A0G2JXH6	539	0	58726.6	2	11	0.000257458	0.0371	36.2275	Keratin, type II cytoskeletal 73 OS=Rattus norvegicus OX=10116 GN=Krt73 PE=1 SV=1
Q498S9	568	0	62848.4	6	12	0.000266524	0.2025	35.495	LOC498793 protein (Fragment) OS=Rattus norvegicus OX=10116 GN=LOC498793 PE=2 SV=1
F1LR92	419	0	46793.5	5	13	0.000391411	0.1193	34.5994	Serine protease inhibitor A3M OS=Rattus norvegicus OX=10116 GN=Serpina3m PE=1 SV=3
Q63556	412	0	46048.1	5	13	0.000398061	0.1214	34.5994	Serine protease inhibitor A3M (Fragment) OS=Rattus norvegicus OX=10116 GN=Serpina3m PE=2 SV=1
F1LYU3	113	0	12275.9	3	12	0.0013397	0.2124	34.4598	Ig-like domain-containing protein OS=Rattus norvegicus OX=10116 PE=4 SV=2
A0A0G2K304	116	0	12563.4	3	12	0.00130505	0.2069	34.4598	Ig-like domain-containing protein OS=Rattus norvegicus OX=10116 PE=4 SV=1
M0R8Q9	117	0	12820.4	3	12	0.00129389	0.2051	34.4598	Ig-like domain-containing protein OS=Rattus norvegicus OX=10116 PE=4 SV=2
A0A0G2JWW4	117	0	12868.4	3	12	0.00129389	0.2051	34.4598	Ig-like domain-containing protein OS=Rattus norvegicus OX=10116 PE=4 SV=1
A0A0G2K4A4	116	0	12666.3	3	12	0.00130505	0.2069	34.4598	Ig-like domain-containing protein OS=Rattus norvegicus OX=10116 PE=4 SV=1
A0A0G2JT95	135	0	14874.5	3	12	0.00112137	0.1778	34.4598	Ig-like domain-containing protein OS=Rattus norvegicus OX=10116 PE=4 SV=1
A0A0G2K3A6	110	0	12206.9	3	12	0.00137623	0.2182	34.4598	Ig-like domain-containing protein OS=Rattus norvegicus OX=10116 PE=4 SV=1
A0A0G2K290	124	0	13877.7	3	12	0.00122085	0.1935	34.4598	Ig-like domain-containing protein OS=Rattus norvegicus OX=10116 PE=4 SV=1
M0RBL2	117	0	12803.1	3	12	0.00129389	0.2051	34.4598	Ig-like domain-containing protein OS=Rattus norvegicus OX=10116 PE=4 SV=1
Q63279	403	0	44590.6	5	18	0.00056347	0.0893	34.0281	Keratin, type I cytoskeletal 19 OS=Rattus norvegicus OX=10116 GN=Krt19 PE=1 SV=2
contaminant_KERATIN10	400	0	44061.1	5	18	0.000567696	0.09	34.0281
D3ZJW6	117	1	13036.6	3	11	0.00118607	0.2991	33.3624	RCG21066 OS=Rattus norvegicus OX=10116 GN=rCG_21066 PE=1 SV=1
Q6LEK4	48	1	5335.7	3	10	0.00262822	0.5208	32.6911	Rat K kininogen gene, 5'end (Fragment) OS=Rattus norvegicus OX=10116 PE=4 SV=1
contaminant_KERATIN04	458	0	49595.4	3	12	0.000330536	0.0764	32.3655
Q8CG43	697	0	78157.7	5	12	0.000217196	0.0918	31.4491	MASP-3 protein (Fragment) OS=Rattus norvegicus OX=10116 GN=masp1-3 PE=3 SV=1
Q71DI1	110	5	11258.8	5	12	0.00137623	0.3	31.3688	Dermcidin OS=Rattus norvegicus OX=10116 PE=2 SV=1
D4A3B0	2375	0	253467	3	13	6.90531e-05	0.0143	31.2018	Talin 2 OS=Rattus norvegicus OX=10116 GN=Tln2 PE=1 SV=3
D3ZA84	2542	0	271496	3	13	6.45165e-05	0.0134	31.2018	Talin 2 OS=Rattus norvegicus OX=10116 GN=Tln2 PE=1 SV=3
A0A0G2JU48	435	0	46372.9	2	10	0.000290011	0.0506	30.6638	Type I keratin KA11 OS=Rattus norvegicus OX=10116 GN=Ka11 PE=3 SV=1
A0A0G2JW58	298	0	33466.4	2	10	0.000423338	0.0738	30.6638	Type I keratin KA11 (Fragment) OS=Rattus norvegicus OX=10116 GN=Ka11 PE=3 SV=1
A0A0G2K4M6	376	0	41879.7	5	13	0.000436173	0.1383	30.4026	Actin, aortic smooth muscle OS=Rattus norvegicus OX=10116 GN=Acta2 PE=3 SV=1
P63269	376	0	41831.8	5	13	0.000436173	0.1383	30.4026	Actin, gamma-enteric smooth muscle OS=Rattus norvegicus OX=10116 GN=Actg2 PE=2 SV=1
P62738	377	0	41963.8	5	13	0.000435016	0.1379	30.4026	Actin, aortic smooth muscle OS=Rattus norvegicus OX=10116 GN=Acta2 PE=2 SV=1
B0BMT0	377	0	41963.8	5	13	0.000435016	0.1379	30.4026	RCG47746, isoform CRA_a OS=Rattus norvegicus OX=10116 GN=Acta2 PE=2 SV=1
P68035	377	0	41973.9	5	13	0.000435016	0.1379	30.4026	Actin, alpha cardiac muscle 1 OS=Rattus norvegicus OX=10116 GN=Actc1 PE=2 SV=1
P68136	377	0	42005.8	5	13	0.000435016	0.1379	30.4026	Actin, alpha skeletal muscle OS=Rattus norvegicus OX=10116 GN=Acta1 PE=1 SV=1
Q63223	51	0	5575.9	2	13	0.00321571	0.4118	29.9735	Rat hemoglobin beta-chain (Fragment) OS=Rattus norvegicus OX=10116 PE=2 SV=1
Q91YB6	1236	0	140234	6	12	0.00012248	0.0631	29.2533	Complement inhibitory factor H OS=Rattus norvegicus OX=10116 GN=Cfh PE=2 SV=1
H6X2W0	230	0	25251.6	2	9	0.000493649	0.0957	29.1905	Pentaxin OS=Rattus norvegicus OX=10116 GN=crp PE=3 SV=1
H6X2V3	230	0	25447.7	2	9	0.000493649	0.0957	29.1905	Pentaxin OS=Rattus norvegicus OX=10116 GN=crp PE=3 SV=1
Q9Z1G8	148	0	15971.9	2	9	0.000767156	0.2635	29.1381	Fibronectin (Fragment) OS=Rattus norvegicus OX=10116 PE=4 SV=1
contaminant_UBIQUITIN08	76	0	8541.6	4	12	0.00199192	0.5658	28.8463
P62982	156	0	17921.5	4	12	0.00097042	0.2756	28.8463	Ubiquitin-40S ribosomal protein S27a OS=Rattus norvegicus OX=10116 GN=Rps27a PE=1 SV=2
Q6PED0	156	0	17921.5	4	12	0.00097042	0.2756	28.8463	RCG23287, isoform CRA_a OS=Rattus norvegicus OX=10116 GN=Rps27a PE=2 SV=1
F1LML2	810	0	90999	4	12	0.000186896	0.0531	28.8463	Polyubiquitin-C OS=Rattus norvegicus OX=10116 GN=Ubc PE=4 SV=1; Additional IDs concatenated into MaxParsimony group: Q63429, Q5FWT0, P0CG51, Q6PED0, P62982, Q6P7R7, P62986, Q63654, contaminant_UBIQUITIN08, F1LU69, F1M927, D4A0J6
Q63429	810	0	91013	4	12	0.000186896	0.0531	28.8463	Polyubiquitin-C OS=Rattus norvegicus OX=10116 GN=Ubc PE=1 SV=1; Additional IDs concatenated into MaxParsimony group: F1LML2, Q5FWT0, P0CG51, P62982, Q6PED0, P62986, Q6P7R7, Q63654, contaminant_UBIQUITIN08, F1LU69, F1M927, D4A0J6
P62986	128	0	14700.9	4	12	0.0011827	0.3359	28.8463	Ubiquitin-60S ribosomal protein L40 OS=Rattus norvegicus OX=10116 GN=Uba52 PE=1 SV=2
P0CG51	305	0	34329.5	4	12	0.000496346	0.141	28.8463	Polyubiquitin-B OS=Rattus norvegicus OX=10116 GN=Ubb PE=1 SV=1
Q6P7R7	128	0	14700.9	4	12	0.0011827	0.3359	28.8463	Ubiquitin A-52 residue ribosomal protein fusion product 1 OS=Rattus norvegicus OX=10116 GN=Uba52 PE=2 SV=1
Q5FWT0	656	0	73656.7	4	12	0.000230771	0.0655	28.8463	Ubc protein (Fragment) OS=Rattus norvegicus OX=10116 GN=Ubc PE=2 SV=1
Q63654	100	0	11216	4	12	0.00151386	0.43	28.8463	Polyubiquitin (Fragment) OS=Rattus norvegicus OX=10116 GN=UBC PE=2 SV=1
F1LZ11	124	3	14039.7	3	9	0.000915638	0.2984	28.2979	Ig-like domain-containing protein OS=Rattus norvegicus OX=10116 PE=1 SV=1
Q63282	26	0	3087.5	1	10	0.0048521	0.3846	28.0336	Keratin K6 (Fragment) OS=Rattus norvegicus OX=10116 GN=keratin K6 PE=4 SV=1
G3V6P7	1960	0	226254	6	10	6.43646e-05	0.0439	27.6731	Myosin heavy chain 9-like 1 OS=Rattus norvegicus OX=10116 GN=Myh9 PE=1 SV=1
Q62812	1961	0	226179	6	10	6.43318e-05	0.0439	27.6731	Myosin-9 OS=Rattus norvegicus OX=10116 GN=Myh9 PE=1 SV=3; Additional IDs concatenated into MaxParsimony group: G3V6P7, G3V9Y1, Q9JLT0, A0A0G2K6S9, E9PTU4, Q63862, B2RYD3; Additional IDs concatenated into MaxParsimony group: G3V6P7, G3V9Y1, Q9JLT0, A0A0G2K6S9, E9PTU4, Q63862, B2RYD3
Q9EQV9	422	4	48777.5	4	11	0.000328839	0.1161	27.2833	Carboxypeptidase B2 OS=Rattus norvegicus OX=10116 GN=Cpb2 PE=2 SV=1
A0A0G2JUY4	110	0	12394	2	9	0.00103217	0.2182	27.1592	Ig-like domain-containing protein OS=Rattus norvegicus OX=10116 PE=1 SV=1
A0A0G2JYX2	118	0	12836.1	2	9	0.000962196	0.2034	27.1592	Ig-like domain-containing protein OS=Rattus norvegicus OX=10116 PE=1 SV=1
M0R5S4	118	0	13185.4	2	9	0.000962196	0.2034	27.1592	Ig-like domain-containing protein OS=Rattus norvegicus OX=10116 PE=4 SV=1
A0A0G2K828	119	0	13195.6	2	10	0.00106012	0.1429	26.9691	Ig-like domain-containing protein OS=Rattus norvegicus OX=10116 PE=4 SV=1
Q4G030	364	0	41085.2	7	13	0.000450552	0.1978	26.8655	C1r protein (Fragment) OS=Rattus norvegicus OX=10116 GN=C1r PE=2 SV=1
contaminant_NRL_1MCOH	428	3	46804.8	3	10	0.000294754	0.0958	26.7178	Immunoglobulin g1 (igg1) (mcg) with a hinge deletion, chain H...
P27139	260	1	29077.6	1	7	0.000339647	0.0615	26.388	Carbonic anhydrase 2 OS=Rattus norvegicus OX=10116 GN=Ca2 PE=1 SV=2
Q9ERD1	218	1	24897.2	5	9	0.000520822	0.2752	26.1095	Clusterin (Fragment) OS=Rattus norvegicus OX=10116 PE=2 SV=1; Additional IDs concatenated into MaxParsimony group: P05371, G3V836, Q6P7S6, O35510, A0A0G2KB42; Additional IDs concatenated into MaxParsimony group: P05371, G3V836, Q6P7S6, O35510, A0A0G2KB42
O35460	497	0	57406.1	5	10	0.000253832	0.1167	26.008	Angiopoietin-1 OS=Rattus norvegicus OX=10116 GN=Angpt1 PE=2 SV=2
Q78EF2	70	0	8091.2	2	8	0.00144177	0.4286	25.8004	Rat apolipoprotein B (apoB) (Fragment) OS=Rattus norvegicus OX=10116 PE=2 SV=1
F1LU69	150	0	17105.9	3	10	0.000841031	0.2267	25.5213	Ubiquitin-like domain-containing protein OS=Rattus norvegicus OX=10116 GN=Rps27a-ps28 PE=4 SV=3
F1M6C2	410	0	44256.7	3	11	0.000338464	0.0756	24.9186	Tr-type G domain-containing protein OS=Rattus norvegicus OX=10116 PE=1 SV=1
E9PTN6	333	0	35974.3	4	9	0.000340958	0.1532	24.6201	Glyceraldehyde-3-phosphate dehydrogenase OS=Rattus norvegicus OX=10116 PE=3 SV=1
P05371	447	0	51324.3	4	8	0.00022578	0.1342	24.6137	Clusterin OS=Rattus norvegicus OX=10116 GN=Clu PE=1 SV=2
Q6P7S6	447	0	51413.4	4	8	0.00022578	0.1342	24.6137	Clusterin OS=Rattus norvegicus OX=10116 GN=Clu PE=2 SV=1
G3V836	447	0	51369.3	4	8	0.00022578	0.1342	24.6137	Clusterin OS=Rattus norvegicus OX=10116 GN=Clu PE=1 SV=1
A0A0G2JXF0	108	0	11775.8	2	7	0.000817669	0.287	24.2488	Ig-like domain-containing protein OS=Rattus norvegicus OX=10116 PE=1 SV=1
A0A0G2K3L5	115	0	12811.3	2	7	0.000767898	0.2696	24.2488	Ig-like domain-containing protein OS=Rattus norvegicus OX=10116 PE=4 SV=1
M0R4X3	96	0	10682.2	2	8	0.00105129	0.1146	23.2429	Ig-like domain-containing protein OS=Rattus norvegicus OX=10116 PE=1 SV=1
A0A068F1Y2	186	0	20408.1	3	9	0.000610426	0.2097	23.1736	Beta-actin (Fragment) OS=Rattus norvegicus OX=10116 GN=Actb PE=2 SV=1
F1M983	1234	0	139898	5	9	9.2009e-05	0.0519	22.701	Complement factor H OS=Rattus norvegicus OX=10116 GN=Cfh PE=1 SV=1
G3V9R2	1235	0	140121	5	9	9.19345e-05	0.0518	22.701	Complement factor H OS=Rattus norvegicus OX=10116 GN=Cfh PE=1 SV=1
D3ZE00	98	0	10824.2	1	7	0.000901104	0.1327	21.9212	Ig-like domain-containing protein OS=Rattus norvegicus OX=10116 PE=1 SV=3
A0A0G2K473	117	0	12957.4	1	7	0.000754771	0.1111	21.9212	Ig-like domain-containing protein OS=Rattus norvegicus OX=10116 PE=4 SV=1
M0R3Y4	118	0	12816.9	1	7	0.000748375	0.1102	21.9212	Ig-like domain-containing protein OS=Rattus norvegicus OX=10116 PE=4 SV=1
A0A0G2K758	166	0	18191.1	1	7	0.000531977	0.0783	21.9212	Ig-like domain-containing protein OS=Rattus norvegicus OX=10116 PE=4 SV=1
F1M0H4	118	0	13168.2	1	7	0.000748375	0.1102	21.9212	Ig-like domain-containing protein OS=Rattus norvegicus OX=10116 PE=4 SV=2
contaminant_NRL_1INDH	213	0	22606.4	2	7	0.000414593	0.0563	21.263	Cha255 immunoglobulin fab' fragment (igg1-lambda) complex With...
contaminant_NRL_1IKFH	228	0	24722.2	2	7	0.000387317	0.0526	21.263	Immunoglobulin igg1-kappa antibody fragment fab complexed With...
Q63051	80	0	9461.7	1	5	0.000788466	0.2	21.1504	Apolipoprotein B (Fragment) OS=Rattus norvegicus OX=10116 GN=apoB PE=2 SV=1
Q5XJW6	689	0	78609.9	4	8	0.000146479	0.0697	20.1538	Cfh protein OS=Rattus norvegicus OX=10116 GN=Cfh PE=1 SV=1
D3ZRN3	376	0	41917.9	3	8	0.000268414	0.0824	19.6414	Actin, beta-like 2 OS=Rattus norvegicus OX=10116 GN=Actbl2 PE=1 SV=1
A0A0G2JZS9	97	3	10786.2	3	7	0.000910394	0.3814	19.4342	Ig-like domain-containing protein OS=Rattus norvegicus OX=10116 PE=1 SV=1
Q99NC6	134	0	14955.4	3	7	0.000659017	0.2687	19.3798	Beta-actin FE-3 (Fragment) OS=Rattus norvegicus OX=10116 PE=2 SV=1
P25030	429	0	49339.3	1	6	0.00017644	0.0256	18.8698	Keratin, type I cytoskeletal 20 OS=Rattus norvegicus OX=10116 GN=Krt20 PE=1 SV=2
D3Z7Y6	431	0	49050.9	1	6	0.000175621	0.0255	18.8698	Keratin, type I cytoskeletal 20 OS=Rattus norvegicus OX=10116 GN=Krt20 PE=1 SV=3
A0A0G2K623	214	0	24898	1	6	0.000353705	0.0514	18.8698	Keratin, type I cytoskeletal 20 (Fragment) OS=Rattus norvegicus OX=10116 GN=Krt20 PE=1 SV=1
contaminant_KERATIN11	424	0	48438.9	1	6	0.000178521	0.0259	18.8698
A0A0G2JY98	140	1	15353.8	2	6	0.000540663	0.1643	18.253	Ig-like domain-containing protein OS=Rattus norvegicus OX=10116 PE=1 SV=1; Additional IDs concatenated into MaxParsimony group: A0A0G2K9Z5; Additional IDs concatenated into MaxParsimony group: A0A0G2K9Z5
F1LXY6	100	3	11221.5	3	8	0.00100924	0.36	17.4519	Ig-like domain-containing protein OS=Rattus norvegicus OX=10116 PE=1 SV=2
P19939	88	1	9836.3	4	8	0.00114686	0.4205	17.023	Apolipoprotein C-I OS=Rattus norvegicus OX=10116 GN=Apoc1 PE=3 SV=1; Additional IDs concatenated into MaxParsimony group: A0A0G2K9R5, M0R547; Additional IDs concatenated into MaxParsimony group: A0A0G2K9R5, M0R547
A0A5C5	258	0	28588.8	3	8	0.000391177	0.1085	17.0114	C4b-binding protein beta chain OS=Rattus norvegicus OX=10116 GN=C4bpb PE=1 SV=1; Additional IDs concatenated into MaxParsimony group: Q63515; Additional IDs concatenated into MaxParsimony group: Q63515
Q63515	258	0	28604.8	3	8	0.000391177	0.1085	17.0114	C4b-binding protein beta chain OS=Rattus norvegicus OX=10116 GN=C4bpb PE=2 SV=1
A0A0G2K8S2	335	0	35911.2	2	5	0.00018829	0.0866	16.3448	Gp_dh_N domain-containing protein OS=Rattus norvegicus OX=10116 PE=1 SV=1
F1M4G6	319	0	33944.9	2	5	0.000197735	0.0909	16.3448	Gp_dh_N domain-containing protein OS=Rattus norvegicus OX=10116 PE=3 SV=1
Q9JJ67	1545	0	174235	1	6	4.89921e-05	0.0097	15.8113	Sulphonylurea receptor 2b OS=Rattus norvegicus OX=10116 GN=SUR2b PE=2 SV=1
F1M9Q2	1545	0	174255	1	6	4.89921e-05	0.0097	15.8113	ATP-binding cassette sub-family C member 9 OS=Rattus norvegicus OX=10116 GN=Abcc9 PE=4 SV=3
Q63563	1545	0	173989	1	6	4.89921e-05	0.0097	15.8113	ATP-binding cassette sub-family C member 9 OS=Rattus norvegicus OX=10116 GN=Abcc9 PE=1 SV=1; Additional IDs concatenated into MaxParsimony group: F1M9Q2, Q9JJ67, D3ZZ00; Additional IDs concatenated into MaxParsimony group: F1M9Q2, Q9JJ67, D3ZZ00
D3ZZ00	1278	0	143334	1	6	5.92275e-05	0.0117	15.8113	ATP-binding cassette sub-family C member 9 OS=Rattus norvegicus OX=10116 GN=Abcc9 PE=4 SV=3
O88752	147	0	16076.5	1	7	0.000600736	0.068	15.7133	Epsilon 1 globin OS=Rattus norvegicus OX=10116 GN=Hbe1 PE=1 SV=1
Q6P6T1	688	0	77003.8	5	6	0.000110019	0.1017	15.654	Complement C1s subcomponent OS=Rattus norvegicus OX=10116 GN=C1s PE=2 SV=2
G3V7L3	694	0	77645.1	5	6	0.000109067	0.1009	15.654	Complement C1s subcomponent OS=Rattus norvegicus OX=10116 GN=C1s PE=1 SV=1; Additional IDs concatenated into MaxParsimony group: Q6P6T1, D4A1S0; Additional IDs concatenated into MaxParsimony group: Q6P6T1, D4A1S0
A0A0G2K9Z5	118	0	13006.5	1	5	0.000534553	0.0932	15.1904	Ig-like domain-containing protein OS=Rattus norvegicus OX=10116 PE=4 SV=1
D3ZEN2	142	0	15345.7	2	5	0.000444206	0.1972	15.0058	Gp_dh_C domain-containing protein OS=Rattus norvegicus OX=10116 PE=4 SV=2
Q6IFX1	491	1	52329.2	2	7	0.000179854	0.0468	14.8312	Keratin, type I cytoskeletal 24 OS=Rattus norvegicus OX=10116 GN=Krt24 PE=3 SV=1
M0RDZ5	95	0	10414.2	2	6	0.000796766	0.2105	14.5714	Ig-like domain-containing protein OS=Rattus norvegicus OX=10116 PE=4 SV=1
D3ZIL8	115	0	12628.2	2	6	0.000658198	0.1739	14.5714	Ig-like domain-containing protein OS=Rattus norvegicus OX=10116 PE=4 SV=2
M0RDL2	102	0	11241.6	2	6	0.000742086	0.1961	14.5714	Ig-like domain-containing protein OS=Rattus norvegicus OX=10116 PE=4 SV=2
A0A0G2K3S3	132	0	14797.5	2	6	0.00057343	0.1515	14.5714	Ig-like domain-containing protein OS=Rattus norvegicus OX=10116 PE=4 SV=1; Additional IDs concatenated into MaxParsimony group: D3ZIL8, M0RDL2, F1M7B3, M0RC23, M0RDZ5, A0A0G2JWX0, D4A3L8, A0A0G2K9W1, F1M6G9, M0RD98, M0RAV0
F1M7B3	102	0	11171.7	2	6	0.000742086	0.1961	14.5714	Ig-like domain-containing protein OS=Rattus norvegicus OX=10116 PE=4 SV=2
M0RC23	102	0	11169.5	2	6	0.000742086	0.1961	14.5714	Ig-like domain-containing protein OS=Rattus norvegicus OX=10116 PE=1 SV=1
G3V8R3	142	0	16049.2	2	6	0.000533048	0.0634	13.9201	Globin e1 OS=Rattus norvegicus OX=10116 GN=Hbz PE=3 SV=1
Q63910	142	0	15497	2	6	0.000533048	0.0634	13.9201	Alpha globin OS=Rattus norvegicus OX=10116 GN=Hba-a3 PE=1 SV=2
A0A221LEF7	474	0	51935.7	2	7	0.000186304	0.019	13.6342	Keratin 25 OS=Rattus norvegicus OX=10116 GN=krt25 PE=2 SV=1
Q6IFX0	446	0	48895.2	2	7	0.000198001	0.0202	13.6342	Keratin, type I cytoskeletal 25 OS=Rattus norvegicus OX=10116 GN=Krt25 PE=3 SV=1
Q6IFW8	449	0	49060.3	2	7	0.000196678	0.02	13.6342	Keratin, type I cytoskeletal 27 OS=Rattus norvegicus OX=10116 GN=Krt27 PE=3 SV=1
Q5BJY9	423	0	47714.3	2	8	0.00023859	0.0331	13.6138	Keratin, type I cytoskeletal 18 OS=Rattus norvegicus OX=10116 GN=Krt18 PE=1 SV=3
Q5XIF6	448	0	49874.4	1	5	0.000140798	0.0312	13.5848	Tubulin alpha-4A chain OS=Rattus norvegicus OX=10116 GN=Tuba4a PE=1 SV=1
Q6AY56	449	0	49987.5	1	5	0.000140484	0.0312	13.5848	Tubulin alpha-8 chain OS=Rattus norvegicus OX=10116 GN=Tuba8 PE=2 SV=1
A0A0H2UHM7	448	0	49756.4	1	5	0.000140798	0.0312	13.5848	Tubulin alpha chain OS=Rattus norvegicus OX=10116 GN=LOC100909441 PE=3 SV=1
Q6AYZ1	449	0	49887.5	1	5	0.000140484	0.0312	13.5848	Tubulin alpha-1C chain OS=Rattus norvegicus OX=10116 GN=Tuba1c PE=1 SV=1
Q6P9V9	451	0	50101.6	1	5	0.000139861	0.031	13.5848	Tubulin alpha-1B chain OS=Rattus norvegicus OX=10116 GN=Tuba1b PE=1 SV=1; Additional IDs concatenated into MaxParsimony group: Q6AYZ1, Q6AY56, Q5XIF6, A0A0H2UHM7; Additional IDs concatenated into MaxParsimony group: Q6AYZ1, Q6AY56, Q5XIF6, A0A0H2UHM7
M0R4W8	248	0	27322.2	1	5	0.000254344	0.0403	13.453	Granszyme B-like 1 OS=Rattus norvegicus OX=10116 GN=Gzmbl1 PE=3 SV=1
G3V8F2	274	0	30471.4	1	5	0.000230209	0.0365	13.453	Mast cell protease 6, isoform CRA_a OS=Rattus norvegicus OX=10116 GN=Tpsb2 PE=3 SV=1
P27435	273	0	30362.3	1	5	0.000231052	0.0366	13.453	Tryptase OS=Rattus norvegicus OX=10116 GN=Tpsab1 PE=1 SV=2
P50343	274	0	30470.5	1	5	0.000230209	0.0365	13.453	Tryptase beta-2 OS=Rattus norvegicus OX=10116 GN=Tpsb2 PE=2 SV=1
D3ZF49	772	0	86293	1	5	8.17064e-05	0.013	13.453	Transmembrane serine protease 6 OS=Rattus norvegicus OX=10116 GN=Tmprss6 PE=1 SV=1
Q6P6W8	273	0	30314.2	1	5	0.000231052	0.0366	13.453	Tryptase alpha/beta 1 OS=Rattus norvegicus OX=10116 GN=Tpsab1 PE=2 SV=1
P18291	248	0	27290.3	1	5	0.000254344	0.0403	13.453	Granzyme B OS=Rattus norvegicus OX=10116 GN=Gzmb PE=1 SV=1
G3V934	258	0	28544.4	1	5	0.000244486	0.0388	13.453	Kallikrein 9 (Predicted) OS=Rattus norvegicus OX=10116 GN=Klk9 PE=3 SV=1
G3V8E5	310	0	34204.1	1	5	0.000203475	0.0323	13.453	Tryptase OS=Rattus norvegicus OX=10116 GN=Tpsab1 PE=1 SV=1
A0A0G2K135	626	0	69710.8	1	5	0.000100762	0.016	13.453	Complement factor I OS=Rattus norvegicus OX=10116 GN=Cfi PE=1 SV=1
F1LSX0	231	0	25277.3	1	5	0.000273062	0.0433	13.453	Peptidase S1 domain-containing protein OS=Rattus norvegicus OX=10116 PE=3 SV=2
Q06605	248	0	27200.1	1	5	0.000254344	0.0403	13.453	Granzyme-like protein 1 OS=Rattus norvegicus OX=10116 PE=2 SV=1
F1M7H8	248	0	27208.1	1	5	0.000254344	0.0403	13.453	Granzyme B-like 2 OS=Rattus norvegicus OX=10116 GN=Gzmbl2 PE=3 SV=3
Q63224	248	0	26988.1	1	5	0.000254344	0.0403	13.453	Granzyme-like protein III OS=Rattus norvegicus OX=10116 GN=Gzmbl3 PE=2 SV=1
Q9WUW3	604	0	67235.6	1	5	0.000104433	0.0166	13.453	Complement factor I OS=Rattus norvegicus OX=10116 GN=Cfi PE=2 SV=1
A0A0A0MY24	248	0	27002.1	1	5	0.000254344	0.0403	13.453	Granzyme B-like 3 OS=Rattus norvegicus OX=10116 GN=Gzmbl3 PE=3 SV=2
A0A0G2K9I6	1084	0	123576	1	4	4.65515e-05	0.0148	13.3283	Ceruloplasmin OS=Rattus norvegicus OX=10116 GN=Cp PE=1 SV=1
Q9JL97	1084	0	123652	1	4	4.65515e-05	0.0148	13.3283	GPI-anchored ceruloplasmin OS=Rattus norvegicus OX=10116 PE=2 SV=1; Additional IDs concatenated into MaxParsimony group: A0A0G2K9I6, G3V7K3; Additional IDs concatenated into MaxParsimony group: A0A0G2K9I6, G3V7K3
G3V7K3	1059	0	120571	1	4	4.76505e-05	0.0151	13.3283	Ceruloplasmin OS=Rattus norvegicus OX=10116 GN=Cp PE=1 SV=1
G3V8D4	97	2	10670.3	2	4	0.000520225	0.3093	13.0361	Apolipoprotein C-II (Predicted) OS=Rattus norvegicus OX=10116 GN=Apoc2 PE=1 SV=1
P70565	745	0	81707.7	1	4	6.7734e-05	0.0242	12.9111	Plakoglobin OS=Rattus norvegicus OX=10116 PE=2 SV=1
Q6P0K8	745	0	81730.8	1	4	6.7734e-05	0.0242	12.9111	Junction plakoglobin OS=Rattus norvegicus OX=10116 GN=Jup PE=1 SV=1; Additional IDs concatenated into MaxParsimony group: P70565; Additional IDs concatenated into MaxParsimony group: P70565
D4A1S0	679	0	76011.8	4	5	9.28974e-05	0.0692	12.7093	Complement C1s subcomponent OS=Rattus norvegicus OX=10116 GN=C1s PE=1 SV=3
F8SQR6	117	0	13095.2	2	5	0.000539122	0.094	12.5386	Immunglobulin heavy chain variable region (Fragment) OS=Rattus norvegicus OX=10116 PE=2 SV=1
Q9JLX9	97	0	10988.4	1	4	0.000520225	0.1856	12.4124	Beta actin (Fragment) OS=Rattus norvegicus OX=10116 PE=2 SV=1
G3V6G1	159	2	17754.7	2	6	0.000476055	0.1447	12.2826	Immunoglobulin joining chain OS=Rattus norvegicus OX=10116 GN=Jchain PE=1 SV=1
O35510	295	0	34075.3	2	4	0.000171057	0.0915	12.2763	Clusterin OS=Rattus norvegicus OX=10116 PE=2 SV=1
A0A0G2KB42	295	0	34134.4	2	4	0.000171057	0.0915	12.2763	Clusterin OS=Rattus norvegicus OX=10116 GN=Clu PE=1 SV=1
Q6LC76	190	0	20510.4	1	3	0.000199192	0.1	12.1188	Fibronectin (Fragment) OS=Rattus norvegicus OX=10116 GN=fn-1 PE=4 SV=1
Q548N6	110	0	12833.7	1	3	0.000344058	0.1273	12.1006	Angiopoietin-1 (Fragment) OS=Rattus norvegicus OX=10116 PE=2 SV=1
Q91Z91	89	0	10194.4	1	3	0.00042524	0.1573	12.1006	Angiopoietin 1 (Fragment) OS=Rattus norvegicus OX=10116 PE=2 SV=1
M0R7M5	132	1	14621.5	2	4	0.000382287	0.2197	12.0639	Ig-like domain-containing protein OS=Rattus norvegicus OX=10116 PE=1 SV=2; Additional IDs concatenated into MaxParsimony group: D3ZIL8, M0RC23, F1M7B3, M0RDL2, M0RDZ5, A0A0G2JWX0, F1M6G9, A0A0G2K9W1, D4A3L8, M0RD98, M0RAV0
F1M1R0	136	1	14866.2	2	4	0.000371043	0.2426	11.9989	Ig-like domain-containing protein OS=Rattus norvegicus OX=10116 GN=LOC690813 PE=1 SV=2; Additional IDs concatenated into MaxParsimony group: F1M195, A0A0G2JWF2, A0A0G2JTG4, A0A0G2K7P6; Additional IDs concatenated into MaxParsimony group: F1M195, A0A0G2JWF2, A0A0G2K7P6, A0A0G2JTG4
A0A0G2JZH3	955	0	104048	1	7	9.24694e-05	0.0073	11.8488	Thrombospondin 3 OS=Rattus norvegicus OX=10116 GN=Thbs3 PE=4 SV=1
M0RBU0	755	0	82482.6	1	7	0.000116965	0.0093	11.8488	Cartilage oligomeric matrix protein OS=Rattus norvegicus OX=10116 GN=Comp PE=4 SV=1
P35444	755	0	82592.7	1	7	0.000116965	0.0093	11.8488	Cartilage oligomeric matrix protein OS=Rattus norvegicus OX=10116 GN=Comp PE=1 SV=1
A0A0G2JXN9	109	0	12767.3	1	7	0.000810167	0.0642	11.8488	Cartilage oligomeric matrix protein (Fragment) OS=Rattus norvegicus OX=10116 GN=Comp PE=4 SV=2
F1LMS5	959	0	105751	1	7	9.20837e-05	0.0073	11.8488	Thrombospondin-4 OS=Rattus norvegicus OX=10116 GN=Thbs4 PE=4 SV=1
P49744	980	0	108127	1	7	9.01104e-05	0.0071	11.8488	Thrombospondin-4 OS=Rattus norvegicus OX=10116 GN=Thbs4 PE=1 SV=1
A0A0G2K7L8	961	0	105963	1	7	9.1892e-05	0.0073	11.8488	Thrombospondin-4 OS=Rattus norvegicus OX=10116 GN=Thbs4 PE=4 SV=1
A0A0G2K9R5	69	0	7539.1	3	5	0.000914164	0.4058	11.6441	Apolipoprotein C-I OS=Rattus norvegicus OX=10116 GN=Apoc1 PE=4 SV=1
B2GVB9	665	4	75556.9	4	5	9.48531e-05	0.0632	11.1875	Fermitin family member 3 OS=Rattus norvegicus OX=10116 GN=Fermt3 PE=1 SV=1
F1LWD0	106	2	11894.9	2	4	0.000476055	0.2358	11.0061	Ig-like domain-containing protein OS=Rattus norvegicus OX=10116 PE=1 SV=2
Reverse_F1LV07	4330	1	495865	1	5	1.45675e-05	0.0044	10.9906
A0A0G2JTG4	94	0	10227.2	2	4	0.000536828	0.2872	10.9904	Ig-like domain-containing protein OS=Rattus norvegicus OX=10116 PE=4 SV=1
F1M195	96	0	10441.2	2	4	0.000525644	0.2812	10.9904	Ig-like domain-containing protein OS=Rattus norvegicus OX=10116 PE=4 SV=3
F1M1Q7	134	0	14550.2	2	4	0.000376581	0.2015	10.9904	Ig-like domain-containing protein OS=Rattus norvegicus OX=10116 PE=4 SV=3
A0A0G2JWF2	95	0	10277	2	4	0.000531177	0.2842	10.9904	Ig-like domain-containing protein OS=Rattus norvegicus OX=10116 PE=4 SV=1
A0A0G2K7P6	94	0	10205	2	4	0.000536828	0.2872	10.9904	IGv domain-containing protein OS=Rattus norvegicus OX=10116 PE=4 SV=1
P14423	146	0	16264.8	3	4	0.000345629	0.137	10.8308	Phospholipase A2, membrane associated OS=Rattus norvegicus OX=10116 GN=Pla2g2a PE=1 SV=2; Additional IDs concatenated into MaxParsimony group: Q6DQ97, Q91Y34, B6VNU1, B6VNU2; Additional IDs concatenated into MaxParsimony group: Q6DQ97, Q91Y34, B6VNU1, B6VNU2
Q6DQ97	146	0	16280.9	3	4	0.000345629	0.137	10.8308	Phospholipase A(2) (Fragment) OS=Rattus norvegicus OX=10116 PE=2 SV=1
M0RDF2	99	0	11158.4	2	4	0.000509716	0.2525	10.6754	Ig-like domain-containing protein OS=Rattus norvegicus OX=10116 PE=1 SV=1
P01805	142	0	15995.9	2	4	0.000355365	0.1761	10.6754	Ig heavy chain V region IR2 OS=Rattus norvegicus OX=10116 PE=4 SV=1; Additional IDs concatenated into MaxParsimony group: M0RDF2, F1M3H2; Additional IDs concatenated into MaxParsimony group: M0RDF2, F1M3H2
F1LP05	553	0	59757.7	1	4	9.12511e-05	0.0235	10.2846	ATP synthase subunit alpha OS=Rattus norvegicus OX=10116 GN=Atp5f1a PE=1 SV=1; Additional IDs concatenated into MaxParsimony group: P15999; Additional IDs concatenated into MaxParsimony group: P15999
P15999	553	0	59698.6	1	4	9.12511e-05	0.0235	10.2846	ATP synthase subunit alpha, mitochondrial OS=Rattus norvegicus OX=10116 GN=Atp5f1a PE=1 SV=2
E9PTV9	333	0	35816	1	3	0.000113653	0.042	10.0439	Glyceraldehyde-3-phosphate dehydrogenase OS=Rattus norvegicus OX=10116 PE=1 SV=2
Q498M9	335	0	36114.1	1	3	0.000112974	0.0418	10.0439	Similar to glyceraldehyde-3-phosphate dehydrogenase OS=Rattus norvegicus OX=10116 GN=LOC303448 PE=1 SV=1
F1M2N4	280	0	30373.2	1	3	0.000135166	0.05	10.0439	Gp_dh_N domain-containing protein OS=Rattus norvegicus OX=10116 PE=1 SV=2
Q8CJG5	454	0	48564.2	1	5	0.000138937	0.0176	9.7955	Gene OS=Rattus norvegicus OX=10116 PE=4 SV=1
Q01205	454	0	48876.3	1	5	0.000138937	0.0176	9.7955	Dihydrolipoyllysine-residue succinyltransferase component of 2-oxoglutarate dehydrogenase complex, mitochondrial OS=Rattus norvegicus OX=10116 GN=Dlst PE=1 SV=2
G3V6P2	454	0	48850.3	1	5	0.000138937	0.0176	9.7955	Dihydrolipoamide S-succinyltransferase (E2 component of 2-oxo-glutarate complex), isoform CRA_a OS=Rattus norvegicus OX=10116 GN=Dlst PE=1 SV=1; Additional IDs concatenated into MaxParsimony group: Q01205, Q8CJG5, D0VYQ0; Additional IDs concatenated into MaxParsimony group: Q01205, Q8CJG5, D0VYQ0
D0VYQ0	270	0	29597.5	1	5	0.00023362	0.0296	9.7955	DLST protein OS=Rattus norvegicus OX=10116 GN=DLST PE=2 SV=1
M0RD98	122	0	13096.7	1	3	0.000310216	0.1066	9.6409	Ig-like domain-containing protein OS=Rattus norvegicus OX=10116 PE=4 SV=2
M0RAV0	93	0	10104.9	1	3	0.00040695	0.1398	9.6409	Ig-like domain-containing protein OS=Rattus norvegicus OX=10116 PE=4 SV=1
P00697	148	0	16700.3	1	3	0.000255719	0.0811	9.5336	Lysozyme C-1 OS=Rattus norvegicus OX=10116 GN=Lyz1 PE=1 SV=2
B2RYD4	155	0	17064.1	1	3	0.00024417	0.0774	9.5336	Lysozyme OS=Rattus norvegicus OX=10116 GN=Lyc2 PE=2 SV=1; Additional IDs concatenated into MaxParsimony group: A0A0G2K5X1, F1M8E9, P00697, Q05820, Q6PDV1; Additional IDs concatenated into MaxParsimony group: A0A0G2K5X1, Q05820, Q6PDV1, F1M8E9, P00697
Q6PDV1	148	0	16701.3	1	3	0.000255719	0.0811	9.5336	Lysozyme OS=Rattus norvegicus OX=10116 GN=Lyz2 PE=2 SV=1
A0A0G2K5X1	150	0	16789.3	1	3	0.000252309	0.08	9.5336	Lysozyme OS=Rattus norvegicus OX=10116 GN=Lyc2 PE=3 SV=1
F1M8E9	148	0	16689.2	1	3	0.000255719	0.0811	9.5336	Lysozyme OS=Rattus norvegicus OX=10116 GN=Lyz2 PE=1 SV=1
Q05820	148	0	16589.2	1	3	0.000255719	0.0811	9.5336	Putative lysozyme C-2 OS=Rattus norvegicus OX=10116 GN=Lyz2 PE=5 SV=1
Q63050	75	0	8763.4	3	4	0.000672825	0.4267	9.5294	Rat apolipoprotein B PI (Fragment) OS=Rattus norvegicus OX=10116 PE=2 SV=1
Q6IFV5	468	0	52202.8	1	5	0.000134781	0.015	9.2478	Keratin 36 OS=Rattus norvegicus OX=10116 GN=Krt36 PE=2 SV=1
F1MAS0	455	0	51479.7	1	5	0.000138631	0.0154	9.2478	Keratin 32 OS=Rattus norvegicus OX=10116 GN=Krt32 PE=3 SV=2
Q6IFV8	414	0	46693.6	1	5	0.000152361	0.0169	9.2478	Type I hair keratin KA25 OS=Rattus norvegicus OX=10116 GN=Krt31 PE=2 SV=1
A0A096MJE0	416	0	47381.9	1	5	0.000151628	0.0168	9.2478	Keratin 32 (Fragment) OS=Rattus norvegicus OX=10116 GN=Krt32 PE=3 SV=1
Q6IFV6	455	0	50624.6	1	5	0.000138631	0.0154	9.2478	Keratin 35 OS=Rattus norvegicus OX=10116 GN=Krt35 PE=2 SV=1
F1MAF7	414	0	46789.7	1	5	0.000152361	0.0169	9.2478	Keratin 31 OS=Rattus norvegicus OX=10116 GN=Krt31 PE=3 SV=2
contaminant_KERATIN09	429	0	47879.5	1	5	0.000147033	0.0163	9.2478
Q6IFW0	404	0	45788.2	1	5	0.000156132	0.0173	9.2478	RCG32608 OS=Rattus norvegicus OX=10116 GN=Krt33b PE=2 SV=1
Q6IFW2	431	0	48246.6	1	5	0.000146351	0.0162	9.2478	Keratin, type I cytoskeletal 40 OS=Rattus norvegicus OX=10116 GN=Krt40 PE=3 SV=1
Q6IFW7	383	0	41281.6	1	5	0.000164693	0.0183	9.2478	Keratin 28 OS=Rattus norvegicus OX=10116 GN=Krt28 PE=2 SV=1
Q6IFV7	455	0	51493.8	1	5	0.000138631	0.0154	9.2478	Keratin 32 OS=Rattus norvegicus OX=10116 GN=Krt32 PE=2 SV=1
Q6IFW5	456	0	48772	1	4	0.000110662	0.0197	9.2205	Keratin, type I cytoskeletal 12 OS=Rattus norvegicus OX=10116 GN=Krt12 PE=3 SV=1
A0A0G2K4H9	483	0	52009.5	1	4	0.000104476	0.0186	9.2205	Keratin, type I cytoskeletal 12 OS=Rattus norvegicus OX=10116 GN=Krt12 PE=3 SV=1
Q5FVP9	393	0	45258.5	2	4	0.000128402	0.0433	8.8707	Cfh protein OS=Rattus norvegicus OX=10116 GN=LOC100361907 PE=2 SV=1
D3ZJI7	388	3	43620.3	3	4	0.000130056	0.0747	8.8529	Serine (Or cysteine) peptidase inhibitor, clade B (Ovalbumin), member 11 (Predicted) OS=Rattus norvegicus OX=10116 GN=Serpinb11 PE=3 SV=1
D3ZBB2	120	0	13118.6	1	3	0.000315387	0.1083	8.6632	Ig-like domain-containing protein OS=Rattus norvegicus OX=10116 PE=1 SV=3
A0A0G2K5D2	126	0	13525.9	1	3	0.000300368	0.1032	8.6632	Ig-like domain-containing protein OS=Rattus norvegicus OX=10116 PE=1 SV=1; Additional IDs concatenated into MaxParsimony group: D3ZBB2, D4ADL1, A0A0G2K9L1, M0RAZ1; Additional IDs concatenated into MaxParsimony group: D3ZBB2, D4ADL1, A0A0G2K9L1, M0RAZ1
D4ADL1	120	0	12888.4	1	3	0.000315387	0.1083	8.6632	Ig-like domain-containing protein OS=Rattus norvegicus OX=10116 PE=4 SV=3
A0A0G2K9L1	115	0	12436.4	1	3	0.000329099	0.113	8.6632	Uncharacterized protein OS=Rattus norvegicus OX=10116 PE=4 SV=1
M0RAZ1	102	0	11081.5	1	3	0.000371043	0.1275	8.6632	Ig-like domain-containing protein OS=Rattus norvegicus OX=10116 PE=4 SV=2
Q5M878	130	0	14945.4	2	4	0.000388168	0.1462	8.6469	Serum amyloid A protein OS=Rattus norvegicus OX=10116 GN=Saa4 PE=1 SV=1
Q7TMC3	830	0	92763.7	2	4	6.07974e-05	0.0229	8.6469	Hermansky-Pudlak syndrome 5 protein homolog OS=Rattus norvegicus OX=10116 GN=Saa4 PE=1 SV=1; Additional IDs concatenated into MaxParsimony group: Q5M878; Additional IDs concatenated into MaxParsimony group: Q5M878
Q4KM33	350	0	39952.5	1	3	0.000108133	0.0686	8.2791	Pleckstrin OS=Rattus norvegicus OX=10116 GN=Plek PE=1 SV=1; Additional IDs concatenated into MaxParsimony group: A0A0G2K393; Additional IDs concatenated into MaxParsimony group: A0A0G2K393
A0A0G2K393	327	0	37208	1	3	0.000115738	0.0734	8.2791	Pleckstrin OS=Rattus norvegicus OX=10116 GN=Plek PE=1 SV=1
G3V984	3933	0	417752	1	3	9.62278e-06	0.0041	8.1463	Protein bassoon OS=Rattus norvegicus OX=10116 GN=Bsn PE=4 SV=1
A0A0G2K1X6	2994	0	321175	1	3	1.26407e-05	0.0053	8.1463	Protein bassoon OS=Rattus norvegicus OX=10116 GN=Bsn PE=4 SV=1
O88778	3938	0	418150	1	3	9.61056e-06	0.0041	8.1463	Protein bassoon OS=Rattus norvegicus OX=10116 GN=Bsn PE=1 SV=3; Additional IDs concatenated into MaxParsimony group: G3V984, A0A0G2K1X6; Additional IDs concatenated into MaxParsimony group: G3V984, A0A0G2K1X6
Q699Y0	486	0	50980.7	1	3	7.78732e-05	0.0247	8.0728	60 kDa chaperonin (Fragment) OS=Bartonella rattimassiliensis OX=270250 PE=3 SV=1; Additional IDs concatenated into MaxParsimony group: Q699Y1; Additional IDs concatenated into MaxParsimony group: Q699Y1
Q699Y1	482	0	50620.6	1	3	7.85195e-05	0.0249	8.0728	60 kDa chaperonin (Fragment) OS=Bartonella rattimassiliensis OX=270250 PE=3 SV=1
Q9QZD2	226	0	25316.5	1	2	0.000111641	0.0752	7.6917	Collagen XVIII (Fragment) OS=Rattus norvegicus OX=10116 PE=2 SV=1
Q9WUW5	171	0	18903.5	1	2	0.000147549	0.0994	7.6917	Collagen type XVIII, alpha (I) chain (Fragment) OS=Rattus norvegicus OX=10116 GN=col18a1 PE=2 SV=1
F1LR02	1311	0	134545	1	2	1.92456e-05	0.013	7.6917	Collagen type XVIII alpha 1 chain OS=Rattus norvegicus OX=10116 GN=Col18a1 PE=1 SV=2; Additional IDs concatenated into MaxParsimony group: Q9QZD2, Q9WUW5; Additional IDs concatenated into MaxParsimony group: Q9QZD2, Q9WUW5
A0N4E8	126	0	13909.7	2	3	0.000300368	0.1429	7.5114	Productively rearranged V-lambda-2 (Fragment) OS=Rattus norvegicus OX=10116 PE=2 SV=1
G3V8Z5	129	0	14255.8	2	3	0.000293383	0.1395	7.5114	Ig-like domain-containing protein OS=Rattus norvegicus OX=10116 PE=1 SV=2; Additional IDs concatenated into MaxParsimony group: A0N4E8, M0R936, E9PSU8, D3ZE07, B2RYW6, M0R4Z4, A2NB82; Additional IDs concatenated into MaxParsimony group: A0N4E8, M0R936, E9PSU8, D3ZE07, B2RYW6, M0R4Z4, A2NB82
Q498D4	1552	0	161859	3	3	2.43856e-05	0.0219	7.4545	Tln1 protein OS=Rattus norvegicus OX=10116 GN=Tln1 PE=2 SV=1
P06238	1472	0	163664	2	3	2.57109e-05	0.0122	7.3974	Alpha-2-macroglobulin OS=Rattus norvegicus OX=10116 GN=A2m PE=2 SV=2
Q5RJN2	493	1	53099.5	2	3	7.67675e-05	0.0325	7.359	Pcolce protein OS=Rattus norvegicus OX=10116 GN=Pcolce PE=1 SV=1; Additional IDs concatenated into MaxParsimony group: O08628; Additional IDs concatenated into MaxParsimony group: O08628
Q6IG04	520	0	56797.9	1	3	7.27815e-05	0.0173	7.2768	Keratin, type II cytoskeletal 72 OS=Rattus norvegicus OX=10116 GN=Krt72 PE=3 SV=2
A0A0G2K7N1	553	0	60379.6	1	3	6.84383e-05	0.0163	7.2768	Keratin, type II cytoskeletal 72 OS=Rattus norvegicus OX=10116 GN=Krt72 PE=3 SV=1
A0A0G2JWU1	253	0	27379	2	3	0.00014959	0.17	7.0624	Triosephosphate isomerase OS=Rattus norvegicus OX=10116 PE=1 SV=1; Additional IDs concatenated into MaxParsimony group: Q6SA19, P48500, A0A0G2JWJ4; Additional IDs concatenated into MaxParsimony group: Q6SA19, P48500, A0A0G2JWJ4
Q6SA19	249	0	26831.7	2	3	0.000151994	0.1727	7.0624	Triosephosphate isomerase OS=Rattus norvegicus OX=10116 GN=LOC500959 PE=2 SV=1
P48500	249	0	26813.7	2	3	0.000151994	0.1727	7.0624	Triosephosphate isomerase OS=Rattus norvegicus OX=10116 GN=Tpi1 PE=1 SV=2
P49864	258	0	28428.6	1	3	0.000146691	0.0388	6.9146	Granzyme K OS=Rattus norvegicus OX=10116 GN=Gzmk PE=1 SV=1; Additional IDs concatenated into MaxParsimony group: F1M8K5; Additional IDs concatenated into MaxParsimony group: F1M8K5
F1M8K5	258	0	28342.5	1	3	0.000146691	0.0388	6.9146	Granzyme K OS=Rattus norvegicus OX=10116 GN=Gzmk PE=3 SV=2
A0A0G2K7X7	846	2	93585.5	2	2	2.98238e-05	0.0366	6.9048	Complement C7 OS=Rattus norvegicus OX=10116 GN=C7 PE=1 SV=1
F1M927	154	0	17843.4	2	4	0.000327674	0.1169	6.7493	Ubiquitin-like domain-containing protein OS=Rattus norvegicus OX=10116 PE=4 SV=2
D3ZWV2	325	0	34971.8	1	2	7.76336e-05	0.0462	6.3009	Glyceraldehyde-3-phosphate dehydrogenase OS=Rattus norvegicus OX=10116 PE=3 SV=3
F1LUI2	198	0	21434.9	1	2	0.000127429	0.0758	6.3009	Gp_dh_C domain-containing protein OS=Rattus norvegicus OX=10116 PE=4 SV=3
A0A0G2JYY8	335	0	35814.8	1	2	7.53162e-05	0.0448	6.3009	Gp_dh_N domain-containing protein OS=Rattus norvegicus OX=10116 PE=1 SV=1
D3ZME3	310	0	33387.9	1	2	8.13901e-05	0.0484	6.3009	Gp_dh_N domain-containing protein OS=Rattus norvegicus OX=10116 PE=1 SV=1
F1LUV3	326	0	35113.9	1	2	7.73955e-05	0.046	6.3009	Gp_dh_N domain-containing protein OS=Rattus norvegicus OX=10116 PE=1 SV=3
F1LZY6	97	0	10458.1	1	2	0.000260113	0.134	6.1978	Ig-like domain-containing protein OS=Rattus norvegicus OX=10116 PE=1 SV=2
M0R816	97	0	10614	1	2	0.000260113	0.134	6.1978	Ig-like domain-containing protein OS=Rattus norvegicus OX=10116 PE=1 SV=2
E9PSP1	496	2	54398.5	2	3	7.63032e-05	0.0423	6.1056	Phospholipid transfer protein OS=Rattus norvegicus OX=10116 GN=Pltp PE=1 SV=1
Q63030	35	0	3521.6	1	3	0.00108133	0.2857	5.9585	Rat alpha-smooth muscle actin mRNA (Fragment) OS=Rattus norvegicus OX=10116 PE=2 SV=1
A0A0G2JYX6	94	0	10841.9	1	4	0.000536828	0.1064	5.8813	1-acylglycerol-3-phosphate O-acyltransferase 1 (Fragment) OS=Rattus norvegicus OX=10116 GN=Agpat1 PE=4 SV=1
A0A0G2K2C3	119	0	13627.3	1	4	0.000424049	0.084	5.8813	1-acylglycerol-3-phosphate O-acyltransferase 1 (Fragment) OS=Rattus norvegicus OX=10116 GN=Agpat1 PE=4 SV=4; Additional IDs concatenated into MaxParsimony group: A0A0G2JYX6; Additional IDs concatenated into MaxParsimony group: A0A0G2JYX6
Q9R0D6	427	0	47371.6	2	3	8.86332e-05	0.0398	5.8793	Transcobalamin-2 OS=Rattus norvegicus OX=10116 GN=Tcn2 PE=2 SV=1
G3V6K1	427	0	47468.7	2	3	8.86332e-05	0.0398	5.8793	Transcobalamin 2, isoform CRA_a OS=Rattus norvegicus OX=10116 GN=Tcn2 PE=4 SV=1; Additional IDs concatenated into MaxParsimony group: Q9R0D6; Additional IDs concatenated into MaxParsimony group: Q9R0D6
Q5FX35	507	0	56173.6	1	2	4.97651e-05	0.0217	5.8143	Alpha 2 macroglobulin cardiac isoform (Fragment) OS=Rattus norvegicus OX=10116 PE=2 SV=1
Q9JMK6	59	0	6454.2	1	2	0.000427643	0.1864	5.8143	TED_complement domain-containing protein (Fragment) OS=Rattus norvegicus OX=10116 PE=2 SV=1
E9PSU8	137	0	15134.2	1	2	0.000184167	0.0803	5.7058	Ig-like domain-containing protein OS=Rattus norvegicus OX=10116 PE=1 SV=3
D3ZE07	131	0	14588	1	2	0.000192602	0.084	5.7058	Ig-like domain-containing protein OS=Rattus norvegicus OX=10116 PE=4 SV=3
M0R4Z4	118	0	13259.4	1	2	0.000213821	0.0932	5.7058	Ig-like domain-containing protein OS=Rattus norvegicus OX=10116 PE=1 SV=2
B2RYW6	129	0	14381.9	1	2	0.000195589	0.0853	5.7058	Ig-like domain-containing protein OS=Rattus norvegicus OX=10116 PE=2 SV=1
M0R936	140	0	15409.2	1	2	0.000180221	0.0786	5.7058	Ig-like domain-containing protein OS=Rattus norvegicus OX=10116 PE=4 SV=2
A2NB82	111	0	12168.8	1	2	0.000227306	0.0991	5.7058	Productively rearranged V-lambda-2 (Fragment) OS=Rattus norvegicus OX=10116 PE=2 SV=1
Q4KM75	346	3	37817.8	3	3	0.000109383	0.0636	5.6862	CD5 antigen-like OS=Rattus norvegicus OX=10116 GN=Cd5l PE=1 SV=1
O08628	468	0	50135	1	2	5.39122e-05	0.0342	5.4962	Procollagen C-endopeptidase enhancer 1 OS=Rattus norvegicus OX=10116 GN=Pcolce PE=1 SV=1
D3ZMS7	115	1	12695.3	1	2	0.000219399	0.0957	5.4962	Ig-like domain-containing protein OS=Rattus norvegicus OX=10116 PE=1 SV=3
M0R547	88	0	9672.3	2	3	0.000430073	0.1818	5.3706	Apolipoprotein C-I-like OS=Rattus norvegicus OX=10116 GN=LOC100910181 PE=4 SV=1
G3V9Y1	1976	0	228839	2	2	1.27687e-05	0.0152	5.2591	Myosin, heavy polypeptide 10, non-muscle, isoform CRA_b OS=Rattus norvegicus OX=10116 GN=Myh10 PE=1 SV=1
Q9JLT0	1976	0	228806	2	2	1.27687e-05	0.0152	5.2591	Myosin-10 OS=Rattus norvegicus OX=10116 GN=Myh10 PE=1 SV=1
contaminant_NRL_1INDL	211	1	22733.2	1	3	0.000179367	0.0379	5.2314	immunoglobulin fab' fragment (igg1-lambda) complex With...
M0RBX3	117	0	13019.4	1	3	0.000323473	0.0598	5.0346	Ig-like domain-containing protein OS=Rattus norvegicus OX=10116 PE=4 SV=2; Additional IDs concatenated into MaxParsimony group: D3ZFF8; Additional IDs concatenated into MaxParsimony group: D3ZFF8
D3ZFF8	117	0	12958.4	1	3	0.000323473	0.0598	5.0346	Ig-like domain-containing protein OS=Rattus norvegicus OX=10116 PE=1 SV=2
A0A0G2JXB7	116	1	12863.4	1	2	0.000217508	0.1034	4.9741	Ig-like domain-containing protein OS=Rattus norvegicus OX=10116 PE=1 SV=1
B1WBQ8	432	0	46673.8	1	2	5.84049e-05	0.0324	4.9619	Glyceraldehyde-3-phosphate dehydrogenase OS=Rattus norvegicus OX=10116 GN=Gapdhs PE=1 SV=1
A0A0G2K7M1	333	0	35651	1	2	7.57685e-05	0.042	4.9619	Glyceraldehyde-3-phosphate dehydrogenase OS=Rattus norvegicus OX=10116 PE=1 SV=1
Q9ESV6	432	0	46659.8	1	2	5.84049e-05	0.0324	4.9619	Glyceraldehyde-3-phosphate dehydrogenase, testis-specific OS=Rattus norvegicus OX=10116 GN=Gapdhs PE=1 SV=1
F1M6G9	132	0	14636.4	1	3	0.000286715	0.053	4.9305	Ig-like domain-containing protein OS=Rattus norvegicus OX=10116 PE=4 SV=2
D4A3L8	132	0	14665.5	1	3	0.000286715	0.053	4.9305	Ig-like domain-containing protein OS=Rattus norvegicus OX=10116 PE=4 SV=2
A0A0G2K9W1	132	0	14639.4	1	3	0.000286715	0.053	4.9305	Ig-like domain-containing protein OS=Rattus norvegicus OX=10116 PE=4 SV=1
A0A0G2JWX0	141	0	15477.8	1	3	0.000268414	0.0496	4.9305	Ig-like domain-containing protein OS=Rattus norvegicus OX=10116 PE=1 SV=1
F1M3H2	99	0	11163.3	1	2	0.000254858	0.0909	4.9098	Ig-like domain-containing protein OS=Rattus norvegicus OX=10116 PE=4 SV=2
A0A0G2JZL1	133	1	14922.5	1	2	0.000189706	0.0677	4.8513	Ig-like domain-containing protein OS=Rattus norvegicus OX=10116 PE=4 SV=1
Q68FY4	476	0	53465	1	1	2.65031e-05	0.0462	4.4214	Group specific component OS=Rattus norvegicus OX=10116 GN=Gc PE=1 SV=1
P04276	476	0	53491	1	1	2.65031e-05	0.0462	4.4214	Vitamin D-binding protein OS=Rattus norvegicus OX=10116 GN=Gc PE=1 SV=3; Additional IDs concatenated into MaxParsimony group: Q68FY4; Additional IDs concatenated into MaxParsimony group: Q68FY4
Reverse_D4AAZ2	313	1	34630.3	1	2	8.061e-05	0.0351	4.2895
A0A0G2JWJ4	263	0	29020.7	1	2	9.59351e-05	0.0532	4.1279	Triosephosphate isomerase OS=Rattus norvegicus OX=10116 GN=LOC100911515 PE=1 SV=1
Reverse_A0A0G2K8N1	8031	0	874179	2	2	3.14169e-06	0.0037	4.0146	; Additional IDs concatenated into MaxParsimony group: Reverse_A0A0G2JUP3; Additional IDs concatenated into MaxParsimony group: Reverse_A0A0G2JUP3
Reverse_A0A0G2JUP3	7496	0	814928	2	2	3.36592e-06	0.004	4.0146
D3ZJK2	387	0	44387.1	1	2	6.51962e-05	0.0258	3.931	Serine (or cysteine) peptidase inhibitor, clade B (ovalbumin), member 3A OS=Rattus norvegicus OX=10116 GN=Serpinb3a PE=3 SV=1
Q6IE44	326	0	37324.1	1	2	7.73955e-05	0.0307	3.931	Serine protease inhibitor B3 OS=Rattus norvegicus OX=10116 GN=Serpinb3 PE=2 SV=1
D3ZPF9	421	0	47482.5	1	2	5.99309e-05	0.0238	3.931	Serpin family B member 12 OS=Rattus norvegicus OX=10116 GN=Serpinb12 PE=3 SV=1
F1MAA9	326	0	37368.2	1	2	7.73955e-05	0.0307	3.931	Serpin family B member 3 OS=Rattus norvegicus OX=10116 GN=Serpinb3 PE=3 SV=2
A0A0G2JT52	188	0	21681.6	2	2	0.000134207	0.1277	3.929	Complement C4A (Fragment) OS=Rattus norvegicus OX=10116 GN=C4a PE=4 SV=1
D3ZEP2	131	1	14672	1	2	0.000192602	0.1069	3.882	Norrie disease homolog (Human) (Predicted), isoform CRA_a OS=Rattus norvegicus OX=10116 GN=LOC100909913 PE=4 SV=1
D3Z9Z0	1707	1	186990	1	1	7.39043e-06	0.0158	3.8175	Ankyrin 1 OS=Rattus norvegicus OX=10116 GN=Ank1 PE=1 SV=1
A0A0G2K4K2	96	0	10382.9	1	2	0.000262822	0.0833	3.7955	Ig-like domain-containing protein OS=Rattus norvegicus OX=10116 PE=1 SV=1
M0RBP7	118	0	12758.1	1	2	0.000213821	0.0678	3.7955	Ig-like domain-containing protein OS=Rattus norvegicus OX=10116 PE=4 SV=1; Additional IDs concatenated into MaxParsimony group: A0A0G2K4K2; Additional IDs concatenated into MaxParsimony group: A0A0G2K4K2
A0A0H2UHH2	275	0	31581	1	1	4.58744e-05	0.0727	3.4906	Serum amyloid P-component OS=Rattus norvegicus OX=10116 GN=Apcs PE=1 SV=1; Additional IDs concatenated into MaxParsimony group: H6X321, H6X332, H6X324, H6X338, H6X331, H6X319, P23680, H6X320; Additional IDs concatenated into MaxParsimony group: H6X320, H6X319, H6X331, H6X338, P23680, H6X324, H6X332, H6X321
H6X321	228	0	26042	1	1	5.5331e-05	0.0877	3.4906	Pentaxin OS=Rattus norvegicus OX=10116 GN=sap PE=3 SV=1
H6X324	228	0	26099	1	1	5.5331e-05	0.0877	3.4906	Pentaxin OS=Rattus norvegicus OX=10116 GN=sap PE=3 SV=1
P23680	228	0	26141.1	1	1	5.5331e-05	0.0877	3.4906	Serum amyloid P-component OS=Rattus norvegicus OX=10116 GN=Apcs PE=2 SV=2
H6X338	228	0	26169.1	1	1	5.5331e-05	0.0877	3.4906	Pentaxin OS=Rattus norvegicus OX=10116 GN=sap PE=3 SV=1
H6X331	228	0	26126	1	1	5.5331e-05	0.0877	3.4906	Pentaxin OS=Rattus norvegicus OX=10116 GN=sap PE=3 SV=1
H6X319	228	0	26069.1	1	1	5.5331e-05	0.0877	3.4906	Pentaxin OS=Rattus norvegicus OX=10116 GN=sap PE=3 SV=1
H6X320	228	0	26141.1	1	1	5.5331e-05	0.0877	3.4906	Pentaxin OS=Rattus norvegicus OX=10116 GN=Apcs PE=3 SV=1
H6X332	228	0	26050	1	1	5.5331e-05	0.0877	3.4906	Pentaxin OS=Rattus norvegicus OX=10116 GN=sap PE=3 SV=1
O08770	567	0	63286.8	1	1	2.22495e-05	0.0265	3.4615	Platelet glycoprotein V OS=Rattus norvegicus OX=10116 GN=Gp5 PE=3 SV=1; Additional IDs concatenated into MaxParsimony group: G3V9H9
G3V9H9	567	0	63300.8	1	1	2.22495e-05	0.0265	3.4615	Glycoprotein 5, platelet OS=Rattus norvegicus OX=10116 GN=NEWGENE_2724 PE=4 SV=1; Additional IDs concatenated into MaxParsimony group: O08770
D4A0J6	165	0	18473.6	1	2	0.000152915	0.0545	3.4243	Ubiquitin-like domain-containing protein OS=Rattus norvegicus OX=10116 PE=4 SV=3
D3ZZ08	120	1	13164.7	1	1	0.000105129	0.1083	3.3984	Ig-like domain-containing protein OS=Rattus norvegicus OX=10116 PE=1 SV=2
Q699X7	294	0	32344.6	2	2	8.58195e-05	0.051	3.3961	RpoB (Fragment) OS=Bartonella rattimassiliensis OX=270250 PE=3 SV=1; Additional IDs concatenated into MaxParsimony group: Q699X6, Q699X8, B2CW40; Additional IDs concatenated into MaxParsimony group: Q699X6, Q699X8, B2CW40
B2CW40	286	0	31382.1	2	2	8.822e-05	0.0524	3.3961	RpoB (Fragment) OS=Bartonella sp. 1-1C OX=515256 GN=rpoB PE=3 SV=1
Q699X6	293	0	32205.5	2	2	8.61124e-05	0.0512	3.3961	RpoB (Fragment) OS=Bartonella phoceensis OX=270249 PE=3 SV=1
Q699X8	291	0	32060.4	2	2	8.67042e-05	0.0515	3.3961	RpoB (Fragment) OS=Bartonella rattimassiliensis OX=270250 PE=3 SV=1
Q64599	216	0	24057.5	1	2	0.00011681	0.0324	3.3657	Hemiferrin OS=Rattus norvegicus OX=10116 GN=LOC286987 PE=2 SV=1
Q6LE95	56	0	5992	1	2	0.000450552	0.1429	3.3382	Kininogen OS=Rattus norvegicus OX=10116 PE=4 SV=1
M0RCN6	114	0	12412.1	1	1	0.000110662	0.1491	3.2675	Similar to immunoglobulin kappa-chain VK-1 OS=Rattus norvegicus OX=10116 GN=RGD1563231 PE=1 SV=1
M0R8B5	120	0	12906.3	1	1	0.000105129	0.1417	3.2675	Ig-like domain-containing protein OS=Rattus norvegicus OX=10116 PE=1 SV=2; Additional IDs concatenated into MaxParsimony group: M0RCN6; Additional IDs concatenated into MaxParsimony group: M0RCN6
M0RAD5	272	1	29685.2	1	2	9.27607e-05	0.0257	3.1889	ATP-dependent Clp protease proteolytic subunit OS=Rattus norvegicus OX=10116 GN=Clpp PE=1 SV=1
P16296	462	1	51757.3	1	1	2.73062e-05	0.0606	3.1554	Coagulation factor IX OS=Rattus norvegicus OX=10116 GN=F9 PE=2 SV=2
Q5U2U0	633	1	69146.7	1	1	1.99296e-05	0.0205	3.1049	ATP-dependent Clp protease ATP-binding subunit clpX-like, mitochondrial OS=Rattus norvegicus OX=10116 GN=Clpx PE=2 SV=1
F1LZH0	123	0	13584.5	1	2	0.000205129	0.0569	3.0368	Ig-like domain-containing protein OS=Rattus norvegicus OX=10116 PE=1 SV=2
Q66HM2	939	0	104090	1	1	1.3435e-05	0.0277	2.9952	AP-2 complex subunit alpha OS=Rattus norvegicus OX=10116 GN=Ap2a2 PE=1 SV=1; Additional IDs concatenated into MaxParsimony group: P18484, A0A0G2K943; Additional IDs concatenated into MaxParsimony group: P18484, A0A0G2K943
A0A0G2K943	915	0	101503	1	1	1.37874e-05	0.0284	2.9952	AP-2 complex subunit alpha OS=Rattus norvegicus OX=10116 GN=Ap2a2 PE=1 SV=1
P18484	938	0	103961	1	1	1.34493e-05	0.0277	2.9952	AP-2 complex subunit alpha-2 OS=Rattus norvegicus OX=10116 GN=Ap2a2 PE=1 SV=3
Q08163	474	1	51538.5	1	1	2.66149e-05	0.0401	2.9589	Adenylyl cyclase-associated protein 1 OS=Rattus norvegicus OX=10116 GN=Cap1 PE=1 SV=3
G3V6I3	415	0	48639.3	1	1	3.03987e-05	0.0867	2.8739	CWC25 spliceosome-associated protein homolog OS=Rattus norvegicus OX=10116 GN=Cwc25 PE=1 SV=1; Additional IDs concatenated into MaxParsimony group: B4F7A4; Additional IDs concatenated into MaxParsimony group: B4F7A4
B4F7A4	355	0	41343.6	1	1	3.55365e-05	0.1014	2.8739	Ccdc49 protein (Fragment) OS=Rattus norvegicus OX=10116 GN=Ccdc49 PE=2 SV=1
F1LWW1	113	1	12339.1	1	1	0.000111641	0.1327	2.8111	Ig-like domain-containing protein OS=Rattus norvegicus OX=10116 PE=1 SV=3
Q63284	48	0	5349.7	1	1	0.000262822	0.5417	2.781	Kininogen (Fragment) OS=Rattus norvegicus OX=10116 PE=4 SV=1
Q5FVP8	388	1	43748.6	1	1	3.25141e-05	0.0696	2.7086	Diacylglycerol O-acyltransferase 2 OS=Rattus norvegicus OX=10116 GN=Dgat2 PE=2 SV=1
M0RCP9	131	1	13787.9	1	2	0.000192602	0.0458	2.5894	Peptidyl-prolyl cis-trans isomerase OS=Rattus norvegicus OX=10116 GN=Pin4 PE=1 SV=1
A0A0G2K6S9	1979	0	227888	1	1	6.37466e-06	0.0096	2.5404	Myosin-11 OS=Rattus norvegicus OX=10116 GN=Myh11 PE=1 SV=1
Q63862	1327	0	152380	1	1	9.50675e-06	0.0143	2.5404	Myosin-11 (Fragments) OS=Rattus norvegicus OX=10116 GN=Myh11 PE=1 SV=3
E9PTU4	1972	0	227138	1	1	6.39729e-06	0.0096	2.5404	Myosin-11 OS=Rattus norvegicus OX=10116 GN=Myh11 PE=1 SV=2
B2RYD3	1027	0	118157	1	1	1.22838e-05	0.0185	2.5404	Myh11 protein (Fragment) OS=Rattus norvegicus OX=10116 GN=Myh11 PE=2 SV=1
O08619	732	0	82588.4	1	1	1.72342e-05	0.0164	2.5151	Coagulation factor XIII A chain OS=Rattus norvegicus OX=10116 GN=F13a1 PE=2 SV=3; Additional IDs concatenated into MaxParsimony group: G3V811; Additional IDs concatenated into MaxParsimony group: G3V811
G3V811	732	0	82983.6	1	1	1.72342e-05	0.0164	2.5151	Coagulation factor XIII A chain OS=Rattus norvegicus OX=10116 GN=F13a1 PE=1 SV=1
Reverse_Q63241	330	0	36556.6	1	1	3.82287e-05	0.0818	2.4663
Reverse_Q63239	331	0	36684.5	1	1	3.81132e-05	0.0816	2.4663	; Additional IDs concatenated into MaxParsimony group: Reverse_Q63241; Additional IDs concatenated into MaxParsimony group: Reverse_Q63241
Reverse_F1MAP0	214	1	24820.9	1	1	5.89508e-05	0.0841	2.4251
P02767	147	1	15691.9	1	1	8.58195e-05	0.102	2.3922	Transthyretin OS=Rattus norvegicus OX=10116 GN=Ttr PE=1 SV=1
F1LPR6	470	1	51349.3	1	1	2.68414e-05	0.0255	2.2989	Immunoglobulin heavy constant mu OS=Rattus norvegicus OX=10116 GN=Ighm PE=1 SV=3
D4A4L6	117	0	12942.4	1	1	0.000107824	0.1282	2.271	Ig-like domain-containing protein OS=Rattus norvegicus OX=10116 PE=1 SV=1; Additional IDs concatenated into MaxParsimony group: D3ZQM9; Additional IDs concatenated into MaxParsimony group: D3ZQM9
D3ZQM9	116	0	12914.4	1	1	0.000108754	0.1293	2.271	Ig-like domain-containing protein OS=Rattus norvegicus OX=10116 PE=1 SV=2
D3ZQR5	116	0	12741.4	1	1	0.000108754	0.1034	2.2547	Ig-like domain-containing protein OS=Rattus norvegicus OX=10116 PE=1 SV=1; Additional IDs concatenated into MaxParsimony group: F1M663; Additional IDs concatenated into MaxParsimony group: F1M663
F1M663	115	0	12706.3	1	1	0.0001097	0.1043	2.2547	Ig-like domain-containing protein OS=Rattus norvegicus OX=10116 PE=1 SV=2
D3ZAB3	119	1	13237.2	1	1	0.000106012	0.1345	2.2426	Ig-like domain-containing protein OS=Rattus norvegicus OX=10116 PE=1 SV=3
M9TC74	137	1	14251.6	1	1	9.20837e-05	0.0876	2.1446	60 kDa chaperonin (Fragment) OS=Anaplasma phagocytophilum OX=948 GN=groEL PE=3 SV=1
D4A9Y3	118	1	13441.6	1	1	0.000106911	0.2627	2.1413	Protein yippee-like OS=Rattus norvegicus OX=10116 GN=Ypel1 PE=3 SV=1
M0R9U2	98	1	10820.4	1	1	0.000128729	0.1633	2.0398	Ig-like domain-containing protein OS=Rattus norvegicus OX=10116 PE=1 SV=1
Q5FVK4	74	1	8736.5	1	1	0.000170479	0.2838	2.0232	Sf3b1 protein OS=Rattus norvegicus OX=10116 GN=Sf3b1 PE=2 SV=1
C0M4B0	517	1	58234.2	1	1	2.44013e-05	0.0232	1.9331	Matrix metallopeptidase 19 OS=Rattus norvegicus OX=10116 GN=Mmp19 PE=2 SV=1
F1LYU4	124	0	13355.8	1	1	0.000101738	0.0887	1.8776	Ig-like domain-containing protein OS=Rattus norvegicus OX=10116 PE=4 SV=3; Additional IDs concatenated into MaxParsimony group: A0A0G2JZV7, F1LUS1; Additional IDs concatenated into MaxParsimony group: A0A0G2JZV7, F1LUS1
F1LUS1	110	0	11914.1	1	1	0.000114686	0.1	1.8776	Ig-like domain-containing protein OS=Rattus norvegicus OX=10116 PE=1 SV=2
A0A0G2JZV7	111	0	12129.2	1	1	0.000113653	0.0991	1.8776	Ig-like domain-containing protein OS=Rattus norvegicus OX=10116 PE=1 SV=1
P70496	1074	0	123717	1	1	1.17462e-05	0.0074	1.8134	Phospholipase D1 OS=Rattus norvegicus OX=10116 GN=Pld1 PE=1 SV=3
A0A0G2K5R0	1077	0	123897	1	1	1.17135e-05	0.0074	1.8134	Phospholipase OS=Rattus norvegicus OX=10116 GN=Pld1 PE=1 SV=1; Additional IDs concatenated into MaxParsimony group: P70496, F1LMG4, D4A318; Additional IDs concatenated into MaxParsimony group: P70496, F1LMG4, D4A318
D4A318	1036	0	119235	1	1	1.21771e-05	0.0077	1.8134	Phospholipase OS=Rattus norvegicus OX=10116 GN=Pld1 PE=1 SV=2
F1LMG4	1074	0	123689	1	1	1.17462e-05	0.0074	1.8134	Phospholipase OS=Rattus norvegicus OX=10116 GN=Pld1 PE=1 SV=2
B6VNU1	46	0	5325.5	1	1	0.000274249	0.1739	1.7608	Phospholipase A2 (Fragment) OS=Rattus norvegicus OX=10116 GN=Pla2g2a PE=3 SV=1
Q91Y34	146	0	16276.8	1	1	8.64073e-05	0.0548	1.7608	Phospholipase A(2) (Fragment) OS=Rattus norvegicus OX=10116 PE=2 SV=1
B6VNU2	46	0	5309.5	1	1	0.000274249	0.1739	1.7608	Phospholipase A2 (Fragment) OS=Rattus norvegicus OX=10116 GN=Pla2g2a PE=3 SV=1
D3ZHF4	278	1	31363.9	1	1	4.53794e-05	0.0396	1.6416	Stathmin domain-containing protein 1-like OS=Rattus norvegicus OX=10116 GN=LOC102554838 PE=4 SV=3
Q5D1M8	356	0	39226.7	1	1	3.54367e-05	0.0197	1.5831	Alpha 2 macroglobulin cardiac isoform (Fragment) OS=Rattus norvegicus OX=10116 PE=2 SV=1
Q99MC5	128	1	14530.6	1	1	9.85583e-05	0.0625	1.542	Hepatocyte growth factor receptor (Fragment) OS=Rattus norvegicus OX=10116 PE=2 SV=1

## Sheet: Table S1D
Table S1D - Number and percentage of proteins found related to each biological process for the Ba-MNPs incubated in plasma for 1 h.
	Ba-MNPs (1 h)
	Biological Process	Number	Percentage
	Metabolic Processes	113	0.1855
	Cell Adhesion	23	0.0377
	Transport of Molecules	38	0.0624
	Inflammatory Processes	42	0.069
	Immunological Processes	238	0.3908
	Coagulation Processes	70	0.1149
	Others	85	0.1396
	TOTAL	609
	The cells that were not painted were considered contamination

## Sheet: Table S1E
Table S1E - Proteomic data and classification for the Ba-MNPs incubated in plasma for 2 h.
Locus	Length	Unique peptides	Mol w	Sequence count	Spectrum count	NSAF	Coverage	Protein Score	Description
M0RBF1	1663	10	186188	137	1388	0.00593411	0.6969	4355.56	Complement C3 OS=Rattus norvegicus OX=10116 GN=C3 PE=1 SV=1; Additional IDs concatenated into MaxParsimony group: M0RBJ7, P01026; Additional IDs concatenated into MaxParsimony group: M0RBJ7, P01026
M0RBJ7	1662	0	186100	127	1334	0.00570667	0.6739	4132.72	Complement C3 OS=Rattus norvegicus OX=10116 GN=C3 PE=1 SV=1
P01026	1663	0	186324	115	1215	0.00519448	0.6097	3757.67	Complement C3 OS=Rattus norvegicus OX=10116 GN=C3 PE=1 SV=3
Q6MG79	1737	0	192052	99	959	0.00392534	0.5936	3233.02	Complement component 4, gene 1 OS=Rattus norvegicus OX=10116 GN=C4a PE=4 SV=1; Additional IDs concatenated into MaxParsimony group: P08649, A0A0G2JW12, F1LNM4, A0A0G2JV52, A0A0G2JT52
P08649	1737	0	192024	99	959	0.00392534	0.5936	3233.02	Complement C4 OS=Rattus norvegicus OX=10116 GN=C4 PE=1 SV=3; Additional IDs concatenated into MaxParsimony group: Q6MG79, A0A0G2JW12, F1LNM4, A0A0G2JV52, A0A0G2JT52
A0A0G2JW12	1737	0	192109	96	941	0.00385166	0.5763	3161.85	Complement C4-like OS=Rattus norvegicus OX=10116 GN=LOC103689965 PE=4 SV=1
M0RB00	1734	1	190460	90	867	0.00355491	0.5225	2876.03	Complement C4A OS=Rattus norvegicus OX=10116 GN=C4a PE=4 SV=2
F1LNM4	1549	0	170428	84	856	0.00392898	0.5804	2863.79	Complement C4-like (Fragment) OS=Rattus norvegicus OX=10116 GN=LOC103689965 PE=4 SV=2
A0A0G2JV52	1374	0	150790	79	811	0.00419655	0.6084	2726.62	Complement C4A (Fragment) OS=Rattus norvegicus OX=10116 GN=C4a PE=4 SV=4
Q6MG90	1737	6	191988	80	743	0.00304121	0.4847	2517.19	Complement C4B (Chido blood group) OS=Rattus norvegicus OX=10116 GN=C4b PE=1 SV=1
Q5EBC0	933	2	103673	57	683	0.00520472	0.6088	2245.25	Inter alpha-trypsin inhibitor, heavy chain 4 OS=Rattus norvegicus OX=10116 GN=Itih4 PE=1 SV=1; Additional IDs concatenated into MaxParsimony group: D3ZFC6; Additional IDs concatenated into MaxParsimony group: D3ZFC6
D3ZFC6	932	0	103667	55	670	0.00511113	0.5858	2213.78	Inter-alpha-trypsin inhibitor heavy chain 4 OS=Rattus norvegicus OX=10116 GN=Itih4 PE=1 SV=3
O35802	932	3	103525	56	642	0.00489753	0.5558	2125.02	Inter-alpha-inhibitor H4 heavy chain OS=Rattus norvegicus OX=10116 GN=ITIH4 PE=2 SV=1
F7F389	580	2	65225.1	52	708	0.00867887	0.5621	2083.64	Complement component C9 OS=Rattus norvegicus OX=10116 GN=C9 PE=1 SV=1; Additional IDs concatenated into MaxParsimony group: Q5BKC4, Q62930, A0A0G2K175, A0A0G2K535; Additional IDs concatenated into MaxParsimony group: Q5BKC4, Q62930, A0A0G2K175, A0A0G2K535
Q5BKC4	567	0	63715.5	50	706	0.00885278	0.575	2079.39	C9 protein OS=Rattus norvegicus OX=10116 GN=C9 PE=2 SV=1
Q62930	554	0	62222.6	47	693	0.00889368	0.5758	2062.17	Complement component C9 OS=Rattus norvegicus OX=10116 GN=C9 PE=1 SV=1
Q6P734	504	46	55558.1	46	593	0.00836531	0.5417	1914.98	Plasma protease C1 inhibitor OS=Rattus norvegicus OX=10116 GN=Serping1 PE=2 SV=1
contaminant_KERATIN03	593	20	59464.9	42	510	0.00611468	0.5497	1828.06
A0A0G2K3G0	536	4	60313.2	41	617	0.00818424	0.5205	1816.7	Histidine-rich glycoprotein OS=Rattus norvegicus OX=10116 GN=Hrg PE=1 SV=1; Additional IDs concatenated into MaxParsimony group: Q99PS8, A0A0G2K9Y5; Additional IDs concatenated into MaxParsimony group: Q99PS8, A0A0G2K9Y5
Q5M7T5	465	25	52182.8	49	542	0.00828713	0.6903	1816.53	Serine (Or cysteine) peptidase inhibitor, clade C (Antithrombin), member 1 OS=Rattus norvegicus OX=10116 GN=Serpinc1 PE=1 SV=1; Additional IDs concatenated into MaxParsimony group: Q7TPI9, A0A096MIW4; Additional IDs concatenated into MaxParsimony group: Q7TPI9, A0A096MIW4
Q99PS8	525	0	58993.7	37	613	0.00830155	0.5314	1806.04	Histidine-rich glycoprotein OS=Rattus norvegicus OX=10116 GN=Hrg PE=1 SV=1
A0A0G2K9Y5	515	0	57872.2	37	613	0.00846275	0.5417	1806.04	Histidine-rich glycoprotein OS=Rattus norvegicus OX=10116 GN=Hrg PE=1 SV=1
F1M6Z1	4506	8	509358	117	607	0.000957757	0.2801	1733.45	Apolipoprotein B-100 OS=Rattus norvegicus OX=10116 GN=Apob PE=1 SV=1; Additional IDs concatenated into MaxParsimony group: Q7TMA5, Q62970, Q64721, Q4G047, Q63050, Q78EF2; Additional IDs concatenated into MaxParsimony group: Q7TMA5, Q62970, Q64721, Q4G047, Q63050, Q78EF2
Q7TMA5	4743	0	535670	109	581	0.000870926	0.2585	1672.76	Apolipoprotein B-100 OS=Rattus norvegicus OX=10116 GN=Apob PE=1 SV=1
Q71SA3	1170	14	129570	52	562	0.00341514	0.3863	1630.3	Thrombospondin 1 OS=Rattus norvegicus OX=10116 GN=Thbs1 PE=2 SV=1; Additional IDs concatenated into MaxParsimony group: M0R979, A0A0G2JV24, D4A2G6, P49744, A0A0G2K7L8, F1LMS5, A0A0G2JZH3, M0RBU0, P35444, A0A0G2JXN9; Additional IDs concatenated into MaxParsimony group: M0R979, A0A0G2JV24, D4A2G6, P49744, A0A0G2K7L8, F1LMS5, A0A0G2JZH3, P35444, M0RBU0, A0A0G2JXN9
Q5FVS2	638	3	71218	58	546	0.00608457	0.6646	1552.03	Kallikrein B, plasma 1 OS=Rattus norvegicus OX=10116 GN=Klkb1 PE=1 SV=1; Additional IDs concatenated into MaxParsimony group: P14272, D3ZF49, A0A0G2K135, Q9WUW3, G3V8E5, G3V8F2, P50343, P27435, Q6P6W8, G3V934, P18291, F1M7H8, Q06605, A0A0A0MY24, M0R4W8, Q63224, F1LSX0; Additional IDs concatenated into MaxParsimony group: P14272, D3ZF49, A0A0G2K135, Q9WUW3, G3V8E5, P50343, G3V8F2, P27435, Q6P6W8, …
P14272	638	0	71209	55	539	0.00600656	0.6646	1533.48	Plasma kallikrein OS=Rattus norvegicus OX=10116 GN=Klkb1 PE=1 SV=1
P08934	639	5	70870.8	41	447	0.00497353	0.5775	1277.36	Kininogen-1 OS=Rattus norvegicus OX=10116 GN=Kng1 PE=2 SV=1; Additional IDs concatenated into MaxParsimony group: P01048, F7EUK4, P08932, A0A0G2KA54, Q63581, A0A0G2KAY3, Q6LE95; Additional IDs concatenated into MaxParsimony group: P01048, F7EUK4, P08932, A0A0G2KA54, Q63581, A0A0G2KAY3, Q6LE95
Q68FP1	780	43	85996.1	43	379	0.00345464	0.5308	1259.92	Gelsolin OS=Rattus norvegicus OX=10116 GN=Gsn PE=1 SV=1
F1LST1	2387	1	262573	60	399	0.00118844	0.3427	1245.42	Fibronectin OS=Rattus norvegicus OX=10116 GN=Fn1 PE=1 SV=3
A0A096P6L8	2477	3	272258	62	399	0.00114526	0.3214	1243.7	Fibronectin OS=Rattus norvegicus OX=10116 GN=Fn1 PE=1 SV=2; Additional IDs concatenated into MaxParsimony group: P04937, Q9Z1G8, Q6LC76; Additional IDs concatenated into MaxParsimony group: P04937, Q9Z1G8, Q6LC76
P04937	2477	0	272323	59	396	0.00113665	0.3214	1237.03	Fibronectin OS=Rattus norvegicus OX=10116 GN=Fn1 PE=1 SV=2
P14046	1477	1	163652	59	407	0.00195917	0.4089	1212.7	Alpha-1-inhibitor 3 OS=Rattus norvegicus OX=10116 GN=A1i3 PE=1 SV=1; Additional IDs concatenated into MaxParsimony group: A0A0G2K926, D4AA52, Q03626, A0A0G2JUW7, A0A0G2JUP5, Q6IE52, P06238, Q5FX35, Q5D1M8, Q9JMK6; Additional IDs concatenated into MaxParsimony group: A0A0G2K926, D4AA52, A0A0G2JUW7, A0A0G2JUP5, Q6IE52, P06238, Q5FX35, Q5D1M8, Q9JMK6
Q569B8	590	2	65028.6	30	363	0.00437434	0.4068	1182.64	Igh-6 protein OS=Rattus norvegicus OX=10116 GN=Igh-6 PE=2 SV=1; Additional IDs concatenated into MaxParsimony group: Q4QQW0, Q569B3, Q3B8R4, F1LPW0, F1LM30, A0A0G2JVP4, Q5BK05, Q5BJZ2, P20760, Q5RK07, F1LPQ6, A0A0G2K9Y0, F1LN61, Q4VBH1, A0A0G2K477, P20759, Q3SYP8, F1LPR6, A0A0G2JT95, A0A0G2K290, A0A0G2JWW4, M0R8Q9, M0RBL2, A0A0G2K4A4, A0A0G2K304, F1LYU3, A0A0G2K3A6, contaminant_NRL_1IKFH, contami…
Q4QQW0	591	0	64869.2	29	361	0.00434288	0.4179	1180.16	Igh-6 protein (Fragment) OS=Rattus norvegicus OX=10116 GN=Igh-6 PE=2 SV=1
Q569B3	617	0	68300.2	28	360	0.00414835	0.389	1178.49	Igh-6 protein OS=Rattus norvegicus OX=10116 GN=Igh-6 PE=2 SV=1
Q3B8R4	595	0	65488.8	28	360	0.00430173	0.4034	1178.49	Igh-6 protein OS=Rattus norvegicus OX=10116 GN=Igh-6 PE=2 SV=1
F1LM30	480	0	52893.3	28	360	0.00533236	0.5	1178.49	Immunoglobulin heavy constant mu OS=Rattus norvegicus OX=10116 GN=Ighm PE=1 SV=3
A0A0G2JVP4	470	0	51657.8	28	360	0.00544581	0.5106	1178.49	Immunoglobulin heavy constant mu OS=Rattus norvegicus OX=10116 GN=Ighm PE=1 SV=1
F1LPW0	495	0	54818.3	28	360	0.00517077	0.4848	1178.49	Immunoglobulin heavy constant mu OS=Rattus norvegicus OX=10116 GN=Ighm PE=1 SV=1
contaminant_KERATIN13	643	28	65436.5	45	383	0.00423493	0.5412	1163.03	; Additional IDs concatenated into MaxParsimony group: A0A0G2K509, F7FFV2, A0A0G2JST3, Q6IMF3, Q6IG02, A0A0G2JWX4, Q4FZU2, Q63280, contaminant_KERATIN14, contaminant_KERATIN15, A0A0G2JZQ9, A0A0H2UHH5, Q6IG05, Q6IG01, A0A0G2JW69, Q10758, Q6IG00, A0A0G2K6P7, contaminant_KERATIN20, Q6IFZ5, A0A0G2JUG1, A0A0G2JVA8, G3V908, Q6IG03, A0A0G2JXH6, D3Z9D2, A0A0G2K7N1, Q6IG04, Q63282; Additional IDs concaten…
contaminant_KERATIN02	622	46	61931.8	47	326	0.00372636	0.6463	1116.97	; Additional IDs concatenated into MaxParsimony group: A0A0G2K2V6, Q6IFW6, Q6IFV1, Q6IFU8, contaminant_KERATIN12, Q6IFU7, Q6IFV3, A0A0G2JXJ9, Q6IFV0, contaminant_KERATIN06, Q63279, contaminant_KERATIN10, Q6IFV4, A0A221LEF7, contaminant_KERATIN04, Q6IFW8, Q6IFX0, A0A0G2JU48, Q5BJY9, A0A0G2JW58, A0A0G2K4H9, Q6IFV5, Q6IFW5, Q6IFV6, F1MAS0, Q6IFV7, Q6IFW2, D3Z7Y6, P25030, contaminant_KERATIN09, conta…
A0A0G2K926	1477	0	163600	55	376	0.00180994	0.3852	1114	Murinoglobulin-1 OS=Rattus norvegicus OX=10116 GN=LOC297568 PE=1 SV=1
D4AA52	1477	0	163598	54	375	0.00180513	0.3744	1110.79	Murinoglobulin-1 OS=Rattus norvegicus OX=10116 GN=LOC297568 PE=1 SV=3
Q5M8A0	433	1	47842.6	34	383	0.00628882	0.6697	1082.57	Kng2 protein OS=Rattus norvegicus OX=10116 GN=Kng2l1 PE=2 SV=1
Q4KM66	234	0	25657.5	18	287	0.00872015	0.4274	1033.22	LOC500183 protein OS=Rattus norvegicus OX=10116 GN=LOC500183 PE=1 SV=1
F1M229	189	0	20902.1	19	288	0.010834	0.545	1028.85	Ig-like domain-containing protein OS=Rattus norvegicus OX=10116 PE=1 SV=3
F1LTN6	228	0	24881.1	19	288	0.00898081	0.4518	1028.85	Uncharacterized protein OS=Rattus norvegicus OX=10116 PE=1 SV=2; Additional IDs concatenated into MaxParsimony group: A0A0G2JZW1, F1M229, B2RZB2, A0A0H2UI36, P01835, P01836, A0A0G2JXF0, F1LZH0, F1M5L5, F1LZY6, M0R816; Additional IDs concatenated into MaxParsimony group: A0A0G2JZW1, F1M229, B2RZB2, A0A0H2UI36, P01835, P01836, A0A0G2JXF0, F1LZH0, F1M5L5, M0R816, F1LZY6
A0A0G2JZW1	223	0	24303.8	19	288	0.00918218	0.4619	1028.85	Ig-like domain-containing protein OS=Rattus norvegicus OX=10116 PE=4 SV=1
B2RZB2	233	0	25570.5	17	283	0.00863552	0.3734	1021.07	Uncharacterized protein OS=Rattus norvegicus OX=10116 PE=2 SV=1
A0A0H2UI36	157	0	17020.1	17	283	0.0128158	0.5541	1021.07	Ig-like domain-containing protein OS=Rattus norvegicus OX=10116 PE=1 SV=1
Q5RK07	371	0	40833.6	25	313	0.0059983	0.5687	1019.87	Igh-6 protein (Fragment) OS=Rattus norvegicus OX=10116 GN=Igh-6 PE=2 SV=1
Q5M8C3	423	7	47998.9	27	332	0.00558028	0.5177	1014.38	Serine (Or cysteine) proteinase inhibitor, clade A (Alpha-1 antiproteinase, antitrypsin), member 4 OS=Rattus norvegicus OX=10116 GN=Serpina4 PE=1 SV=1; Additional IDs concatenated into MaxParsimony group: P97569; Additional IDs concatenated into MaxParsimony group: P97569
Q5M7V3	461	0	50898.3	30	322	0.00496607	0.5944	941.103	LOC367586 protein OS=Rattus norvegicus OX=10116 GN=LOC367586 PE=2 SV=1
D4A6E3	1487	1	165203	50	326	0.00155871	0.3598	939.874	Murinoglobulin-1 OS=Rattus norvegicus OX=10116 GN=Mug1 PE=1 SV=2
Q03626	1487	0	165203	50	326	0.00155871	0.3652	939.816	Murinoglobulin-1 OS=Rattus norvegicus OX=10116 GN=Mug1 PE=2 SV=1
A0A0G2JUW7	1487	0	165637	49	325	0.00155393	0.3598	937.423	Murinoglobulin-1 OS=Rattus norvegicus OX=10116 GN=Mug1 PE=4 SV=1
P97569	423	0	47972.9	20	296	0.00497519	0.4775	922.54	Kallistatin OS=Rattus norvegicus OX=10116 PE=2 SV=1
Q32Q89	427	2	48319.6	27	300	0.00499518	0.5316	912.61	Fgl2 protein (Fragment) OS=Rattus norvegicus OX=10116 GN=Fgl2 PE=2 SV=1; Additional IDs concatenated into MaxParsimony group: G3V7P2, Q5U3X5, Q6IN12, Q9EPT7; Additional IDs concatenated into MaxParsimony group: G3V7P2, Q5U3X5, Q6IN12, Q9EPT7
G3V7P2	429	0	48606.8	25	298	0.00493875	0.5291	909.216	Fibrinogen-like 2 OS=Rattus norvegicus OX=10116 GN=Fgl2 PE=1 SV=1
Q6IN12	419	0	47367.1	25	298	0.00505662	0.5418	909.216	Fgl2 protein (Fragment) OS=Rattus norvegicus OX=10116 GN=Fgl2 PE=2 SV=1
Q5U3X5	422	0	47753.3	25	298	0.00502067	0.5379	909.216	Fgl2 protein (Fragment) OS=Rattus norvegicus OX=10116 GN=Fgl2 PE=2 SV=1
M0R979	1144	0	126942	38	350	0.0021752	0.2911	899.813	Thrombospondin 1 OS=Rattus norvegicus OX=10116 GN=Thbs1 PE=1 SV=2
A0A0G2JSK1	416	4	46430	27	260	0.00444363	0.5553	883.544	RCG20603 OS=Rattus norvegicus OX=10116 GN=Serpina3c PE=3 SV=1; Additional IDs concatenated into MaxParsimony group: P09006, A0A0H2UHI5, A0A0G2KB85, E0A3N4, Q7TMB9, F1LM05, A0A0G2JYK0, A0A0G2K1T8, P09005, Q63556, F1M8F5; Additional IDs concatenated into MaxParsimony group: P09006, A0A0H2UHI5, A0A0G2KB85, E0A3N4, Q7TMB9, F1LM05, A0A0G2JYK0, A0A0G2K1T8, P09005, Q63556, F1M8F5
Q5M842	458	1	50217.8	29	299	0.00464156	0.559	878.251	IgG-2a protein OS=Rattus norvegicus OX=10116 GN=IgG-2a PE=1 SV=1
Q9EPT7	357	0	40921.9	23	289	0.00575556	0.5434	876.837	Prothrombinase FGL2 OS=Rattus norvegicus OX=10116 PE=2 SV=1
Q5BK05	458	0	49893.6	28	298	0.00462603	0.5611	875.981	LOC367586 protein OS=Rattus norvegicus OX=10116 GN=LOC367586 PE=2 SV=1
Q5BJZ2	458	0	50110.6	27	297	0.00461051	0.5459	874.307	LOC367586 protein OS=Rattus norvegicus OX=10116 GN=LOC367586 PE=1 SV=1
P01835	106	0	11575.5	15	245	0.0164331	0.8113	864.638	Ig kappa chain C region, B allele OS=Rattus norvegicus OX=10116 PE=1 SV=1
P20760	322	0	35145.4	26	293	0.00646949	0.7174	861.389	Ig gamma-2A chain C region OS=Rattus norvegicus OX=10116 GN=Igg-2a PE=1 SV=1
A0A0G2JUP5	1450	0	161244	48	306	0.00150042	0.351	858.514	Murinoglobulin-1 OS=Rattus norvegicus OX=10116 GN=Mug1 PE=4 SV=1
P20762	329	20	36530.4	25	293	0.00633184	0.7112	837.701	Ig gamma-2C chain C region OS=Rattus norvegicus OX=10116 PE=2 SV=1
G3V843	617	2	70322.6	28	270	0.00311126	0.3274	837.515	Prothrombin OS=Rattus norvegicus OX=10116 GN=F2 PE=1 SV=1; Additional IDs concatenated into MaxParsimony group: P18292; Additional IDs concatenated into MaxParsimony group: P18292
Q62905	478	1	54626.2	21	285	0.00423911	0.3577	836.975	Vitronectin OS=Rattus norvegicus OX=10116 PE=2 SV=1; Additional IDs concatenated into MaxParsimony group: Q7TQ11, Q3KR94; Additional IDs concatenated into MaxParsimony group: Q7TQ11, Q3KR94
Q3KR94	478	0	54672.2	20	284	0.00422424	0.3577	834.789	Vitronectin OS=Rattus norvegicus OX=10116 GN=Vtn PE=1 SV=1
Q7TQ11	490	0	55906.7	20	284	0.00412079	0.349	834.789	Aa1018 OS=Rattus norvegicus OX=10116 GN=Vtn PE=1 SV=1
P18292	617	0	70348.7	26	268	0.00308822	0.3274	833.904	Prothrombin OS=Rattus norvegicus OX=10116 GN=F2 PE=1 SV=1
P05545	416	5	46514.1	26	245	0.00418727	0.5264	833.418	Serine protease inhibitor A3K OS=Rattus norvegicus OX=10116 GN=Serpina3k PE=1 SV=3
Q6IE52	1448	0	161469	41	283	0.00138956	0.2907	801.687	Murinoglobulin-2 OS=Rattus norvegicus OX=10116 GN=Mug2 PE=1 SV=1
A0A0G2K2V6	559	0	56760.7	19	228	0.00289989	0.2415	798.271	Keratin, type I cytoskeletal 10 OS=Rattus norvegicus OX=10116 GN=Krt10 PE=1 SV=1
Q6IFW6	526	0	56452.5	19	228	0.00308182	0.2567	798.271	Keratin, type I cytoskeletal 10 OS=Rattus norvegicus OX=10116 GN=Krt10 PE=3 SV=1
P24090	352	3	37940.2	17	199	0.00401947	0.5284	789.845	Alpha-2-HS-glycoprotein OS=Rattus norvegicus OX=10116 GN=Ahsg PE=1 SV=2; Additional IDs concatenated into MaxParsimony group: Q7TP75; Additional IDs concatenated into MaxParsimony group: Q7TP75
A0A0G2K4I9	622	14	69535.8	32	243	0.00277763	0.545	786.423	Coagulation factor XI OS=Rattus norvegicus OX=10116 GN=F11 PE=1 SV=1
contaminant_KERATIN22	645	29	65807.4	38	262	0.00288802	0.6946	784.395
O70211	603	0	66864.7	22	245	0.00288873	0.476	778.786	Insulin-like growth factor binding protein complex acid-labile subunit OS=Rattus norvegicus OX=10116 PE=4 SV=1; Additional IDs concatenated into MaxParsimony group: P35859; Additional IDs concatenated into MaxParsimony group: P35859
Q7TPI9	593	0	66431.7	24	235	0.00281755	0.2901	777.764	Ac2-248 OS=Rattus norvegicus OX=10116 PE=2 SV=1
M0R5V7	1365	1	151849	40	268	0.00139592	0.2967	759.746	Murinoglobulin-2 OS=Rattus norvegicus OX=10116 GN=Mug2 PE=1 SV=2
P02770	608	1	68668.1	33	262	0.00306377	0.5148	758.012	Serum albumin OS=Rattus norvegicus OX=10116 GN=Alb PE=1 SV=2
P35859	603	0	66751.6	21	233	0.00274724	0.461	756.772	Insulin-like growth factor-binding protein complex acid labile subunit OS=Rattus norvegicus OX=10116 GN=Igfals PE=1 SV=1
F1LRE2	603	1	66838.7	22	240	0.00282978	0.476	755.108	Insulin-like growth factor binding protein, acid labile subunit, isoform CRA_b OS=Rattus norvegicus OX=10116 GN=Igfals PE=1 SV=2
A0A0G2JV24	1152	0	127771	34	307	0.00189472	0.2552	750.459	Thrombospondin 1 OS=Rattus norvegicus OX=10116 GN=Thbs1 PE=1 SV=1
B2RYM3	904	34	100508	34	217	0.00170667	0.3606	736.069	Inter-alpha trypsin inhibitor, heavy chain 1 OS=Rattus norvegicus OX=10116 GN=Itih1 PE=1 SV=1
A0A0G2JSH5	608	1	68696.1	33	254	0.00297022	0.5049	728.077	Serum albumin OS=Rattus norvegicus OX=10116 GN=Alb PE=1 SV=1
P04639	259	24	30025.2	24	238	0.00653334	0.7259	702.635	Apolipoprotein A-I OS=Rattus norvegicus OX=10116 GN=Apoa1 PE=1 SV=2
A0A0H2UHI5	408	0	45434.6	26	199	0.00346778	0.5588	674.057	Serine protease inhibitor A3N OS=Rattus norvegicus OX=10116 GN=Serpina3n PE=1 SV=1
P09006	418	0	46604.3	26	199	0.00338481	0.5455	674.057	Serine protease inhibitor A3N OS=Rattus norvegicus OX=10116 GN=Serpina3n PE=1 SV=3
A0A0G2K9B1	432	0	48324.1	26	199	0.00327512	0.5278	674.057	Serine protease inhibitor A3N OS=Rattus norvegicus OX=10116 GN=LOC299282 PE=1 SV=1
G3V7Z4	397	2	44003.3	25	220	0.00393995	0.5038	672.79	Glia-derived nexin OS=Rattus norvegicus OX=10116 GN=Serpine2 PE=3 SV=1; Additional IDs concatenated into MaxParsimony group: P07092, D3ZPF9, D3ZJK2, Q6IE44, F1MAA9; Additional IDs concatenated into MaxParsimony group: P07092, D3ZPF9, D3ZJK2, F1MAA9, Q6IE44
A0A0G2KB85	430	0	48038	25	195	0.00322422	0.5047	664.575	Serine protease inhibitor A3N OS=Rattus norvegicus OX=10116 GN=LOC299282 PE=1 SV=1
E0A3N4	430	0	47992	25	195	0.00322422	0.5047	664.575	Serpina3n-like protein OS=Rattus norvegicus OX=10116 PE=2 SV=1
D4A3E0	1210	35	135500	35	212	0.00124569	0.2835	664.505	Multimerin 1 OS=Rattus norvegicus OX=10116 GN=Mmrn1 PE=4 SV=1
Q7TMB9	611	0	68162.5	23	195	0.00226909	0.347	657.661	Ab1-021 OS=Rattus norvegicus OX=10116 GN=LOC299282 PE=2 SV=1
A0A0G2JYK0	609	0	67922.4	23	195	0.00227654	0.3481	657.661	Serine protease inhibitor A3N OS=Rattus norvegicus OX=10116 GN=LOC299282 PE=1 SV=1
F1LM05	610	0	68105.5	23	195	0.00227281	0.3475	657.661	Serine protease inhibitor A3N OS=Rattus norvegicus OX=10116 GN=LOC299282 PE=1 SV=1
G3V9J1	872	8	97260	32	213	0.00173669	0.3028	627.777	Uncharacterized protein OS=Rattus norvegicus OX=10116 PE=1 SV=3
A0A0G2K1T8	416	0	46257.9	21	178	0.00304218	0.5361	624.267	Serine protease inhibitor A3N OS=Rattus norvegicus OX=10116 GN=LOC299282 PE=1 SV=1
A0A142BM04	203	1	22278	9	169	0.005919	0.3695	623.64	Anti-F4/80 kappa light chain variable region (Fragment) OS=Rattus norvegicus OX=10116 PE=2 SV=1
P07092	397	0	44017.3	23	198	0.00354595	0.4685	615.95	Glia-derived nexin OS=Rattus norvegicus OX=10116 GN=Serpine2 PE=1 SV=1
Q01177	812	14	90458.9	33	213	0.00186501	0.4754	572.671	Plasminogen OS=Rattus norvegicus OX=10116 GN=Plg PE=2 SV=2
Q63514	558	0	62207	32	246	0.00313443	0.4892	556.751	C4b-binding protein alpha chain OS=Rattus norvegicus OX=10116 GN=C4bpa PE=2 SV=1
Q5M891	601	0	67139.6	32	246	0.00291017	0.4542	556.751	C4b-binding protein alpha chain OS=Rattus norvegicus OX=10116 GN=C4bpa PE=1 SV=1; Additional IDs concatenated into MaxParsimony group: Q63514, A9CME3; Additional IDs concatenated into MaxParsimony group: Q63514, A9CME3
D3ZBS2	887	0	98987.7	29	186	0.0014909	0.3213	552.083	Inter-alpha-trypsin inhibitor heavy chain H3 OS=Rattus norvegicus OX=10116 GN=Itih3 PE=1 SV=3
Q63416	887	0	99017.6	29	186	0.0014909	0.3213	552.083	Inter-alpha-trypsin inhibitor heavy chain H3 OS=Rattus norvegicus OX=10116 GN=Itih3 PE=2 SV=1; Additional IDs concatenated into MaxParsimony group: D3ZBS2; Additional IDs concatenated into MaxParsimony group: D3ZBS2
P01836	106	0	11706.6	11	156	0.0104635	0.4434	551.01	Ig kappa chain C region, A allele OS=Rattus norvegicus OX=10116 PE=1 SV=1
A0A0G2K9Y0	467	0	51541.3	21	186	0.00283174	0.379	550.186	Immunoglobulin heavy constant mu OS=Rattus norvegicus OX=10116 GN=Ighm PE=4 SV=1
F1LPQ6	468	0	51619.3	21	186	0.00282569	0.3782	550.186	Immunoglobulin heavy constant mu OS=Rattus norvegicus OX=10116 GN=Ighm PE=4 SV=2
P02091	147	0	15951.2	14	191	0.00923792	0.8844	549.054	Hemoglobin subunit beta-1 OS=Rattus norvegicus OX=10116 GN=Hbb PE=1 SV=3; Additional IDs concatenated into MaxParsimony group: A0A0G2JSW3, A0A1K0FUA6, P11517, A0A0G2JTW9, Q62670, Q6PDU6, Q63011, Q63223, O88752; Additional IDs concatenated into MaxParsimony group: A0A0G2JSW3, P11517, A0A1K0FUA6, A0A0G2JTW9, Q6PDU6, Q62670, Q63011, Q63223, O88752
Q7TPK2	2102	4	237092	39	204	0.00069001	0.1522	540.496	Ac2-120 OS=Rattus norvegicus OX=10116 GN=F5 PE=2 SV=1; Additional IDs concatenated into MaxParsimony group: A0A0G2K3W2, A0A0G2JXI1, E9JS74, E9JS75, Q7TN96, D3ZEB1; Additional IDs concatenated into MaxParsimony group: A0A0G2K3W2, A0A0G2JXI1, E9JS74, E9JS75, Q7TN96, D3ZEB1
P05544	413	0	46230.1	22	172	0.00296099	0.4818	535.246	Serine protease inhibitor A3L OS=Rattus norvegicus OX=10116 GN=Serpina3l PE=1 SV=3
F1LM19	352	1	38304.6	15	155	0.00313074	0.4205	535.052	Uncharacterized protein OS=Rattus norvegicus OX=10116 PE=1 SV=3
A0A0G2JXK5	413	1	46172.1	22	169	0.00290934	0.4625	531.48	Serine protease inhibitor A3N OS=Rattus norvegicus OX=10116 GN=LOC299282 PE=1 SV=1
A0A0G2JSW3	147	0	15937.2	13	183	0.00885099	0.8027	531.367	Globin a4 OS=Rattus norvegicus OX=10116 GN=Hbb PE=1 SV=1
A9CME3	600	0	66973.5	30	231	0.00273728	0.4117	524.209	Complement component 4 binding protein, alpha OS=Rattus norvegicus OX=10116 GN=C4bpa PE=4 SV=1
F1LN61	456	0	50333.7	19	174	0.00271295	0.364	522.157	Immunoglobulin heavy constant mu OS=Rattus norvegicus OX=10116 GN=Ighm PE=4 SV=3
Q6TUF8	556	2	62930.8	20	153	0.00195648	0.3058	515.941	Coagulation factor XI OS=Rattus norvegicus OX=10116 GN=F11 PE=1 SV=1
Q569B4	468	1	52268.8	19	165	0.00250666	0.3675	497.818	Ighg protein OS=Rattus norvegicus OX=10116 GN=Ighg PE=1 SV=1
A0A0G2K477	466	0	51086.3	18	174	0.00265474	0.4335	491.846	Immunoglobulin heavy constant mu OS=Rattus norvegicus OX=10116 GN=Ighm PE=4 SV=1
Q4VBH1	467	0	51600.2	18	161	0.00245113	0.3276	483.39	Ighg protein OS=Rattus norvegicus OX=10116 GN=Ighg PE=1 SV=1
P20759	326	0	35904.7	17	157	0.00342405	0.411	470.471	Ig gamma-1 chain C region OS=Rattus norvegicus OX=10116 PE=1 SV=1
Q63041	1500	39	167001	39	166	0.000786819	0.3173	466.934	Alpha-1-macroglobulin OS=Rattus norvegicus OX=10116 GN=A1m PE=1 SV=1
Q68FT8	491	0	54840	22	158	0.00228788	0.4277	459.808	RCG33981, isoform CRA_a OS=Rattus norvegicus OX=10116 GN=Serpinf2 PE=2 SV=1
F7FHF3	554	0	62233.7	22	158	0.00202771	0.3791	459.808	Serpin family F member 2 OS=Rattus norvegicus OX=10116 GN=Serpinf2 PE=1 SV=1; Additional IDs concatenated into MaxParsimony group: Q68FT8; Additional IDs concatenated into MaxParsimony group: Q68FT8
Q7TP75	553	0	61426.6	13	136	0.00174852	0.2315	457.938	Aa2-066 OS=Rattus norvegicus OX=10116 PE=1 SV=1
A0A0G2K3W2	1688	0	190851	33	165	0.000694976	0.1665	436.018	Coagulation factor V OS=Rattus norvegicus OX=10116 GN=F5 PE=1 SV=1
Q63313	481	0	53548.3	21	164	0.00242413	0.4262	408.572	Lipopolysaccharide-binding protein OS=Rattus norvegicus OX=10116 GN=Lbp PE=2 SV=1; Additional IDs concatenated into MaxParsimony group: Q3MID7; Additional IDs concatenated into MaxParsimony group: Q3MID7
Q3MID7	481	0	53446.3	21	164	0.00242413	0.4262	408.572	Lipopolysaccharide-binding protein OS=Rattus norvegicus OX=10116 GN=Lbp PE=1 SV=1
Q62894	562	18	63190	18	155	0.00196089	0.3149	398.035	Extracellular matrix protein 1 OS=Rattus norvegicus OX=10116 GN=Ecm1 PE=1 SV=2
P11517	147	0	15954.3	10	150	0.00725491	0.6054	396.596	Hemoglobin subunit beta-2 OS=Rattus norvegicus OX=10116 PE=1 SV=2
A0A1K0FUA6	147	0	15954.3	10	150	0.00725491	0.6054	396.596	Globin a2 OS=Rattus norvegicus OX=10116 GN=LOC689064 PE=3 SV=1
D3ZFH5	826	16	92293.3	28	133	0.0011448	0.3547	387.59	Inter-alpha-trypsin inhibitor heavy chain 2 OS=Rattus norvegicus OX=10116 GN=Itih2 PE=1 SV=3; Additional IDs concatenated into MaxParsimony group: Q498S9; Additional IDs concatenated into MaxParsimony group: Q498S9
Q3SYP8	118	0	12912.3	8	108	0.00650728	0.7034	383.917	Igh-6 protein (Fragment) OS=Rattus norvegicus OX=10116 GN=Igh-6 PE=2 SV=1
P08932	430	0	47655.4	18	148	0.0024471	0.3419	378.915	T-kininogen 2 OS=Rattus norvegicus OX=10116 PE=1 SV=2
F7EUK4	432	0	47879.5	18	148	0.00243577	0.3403	378.915	Kininogen-1 OS=Rattus norvegicus OX=10116 GN=Kng1 PE=1 SV=2
Q5PQU1	430	1	47715.6	20	137	0.00226522	0.4209	372.308	Kininogen 1 OS=Rattus norvegicus OX=10116 GN=Kng2 PE=2 SV=1
A0A0G2JVQ5	635	1	70470.4	18	144	0.0016123	0.2189	372.196	Kininogen-1 OS=Rattus norvegicus OX=10116 GN=Kng1 PE=1 SV=1
A0A0G2KA54	635	0	70381.3	17	143	0.00160111	0.2189	369.759	Kininogen-1 OS=Rattus norvegicus OX=10116 GN=Kng1 PE=1 SV=1
A0A0G2KAY3	398	0	44221	17	143	0.00255453	0.3492	369.759	Kininogen-1 OS=Rattus norvegicus OX=10116 GN=Kng1 PE=1 SV=1
A0A0G2JXI1	1833	0	206196	25	129	0.000500363	0.1178	369.62	Coagulation factor V OS=Rattus norvegicus OX=10116 GN=F5 PE=1 SV=1
P01048	430	0	47726.6	19	133	0.00219908	0.3837	361.131	T-kininogen 1 OS=Rattus norvegicus OX=10116 GN=Map1 PE=1 SV=2
M0RAB8	100	11	11072.5	11	104	0.0073942	0.84	353.37	Ig-like domain-containing protein OS=Rattus norvegicus OX=10116 PE=4 SV=2
A0A0H2UHR6	494	1	55430.7	17	125	0.00179904	0.2105	339.594	Coagulation factor X OS=Rattus norvegicus OX=10116 GN=F10 PE=1 SV=1; Additional IDs concatenated into MaxParsimony group: Q63207, Q63109; Additional IDs concatenated into MaxParsimony group: Q63207, Q63109
Q63207	482	0	54212.1	16	124	0.00182908	0.2158	338.34	Coagulation factor X OS=Rattus norvegicus OX=10116 GN=F10 PE=2 SV=1
Q63581	430	0	47569.5	17	122	0.0020172	0.3488	337.159	Uncharacterized protein OS=Rattus norvegicus OX=10116 PE=4 SV=1
P55314	589	18	66605.5	18	99	0.00119503	0.3192	331.885	Complement component C8 beta chain OS=Rattus norvegicus OX=10116 GN=C8b PE=2 SV=2
P25236	385	6	43047.8	14	96	0.00177284	0.2753	323.894	Selenoprotein P OS=Rattus norvegicus OX=10116 GN=Selenop PE=1 SV=2; Additional IDs concatenated into MaxParsimony group: A0A0G2JU99; Additional IDs concatenated into MaxParsimony group: A0A0G2JU99
Q80ZA3	418	18	46418.2	18	100	0.00170091	0.4641	319.524	Alpha-2 antiplasmin OS=Rattus norvegicus OX=10116 GN=Serpinf1 PE=1 SV=1
P19999	238	13	25273.7	13	105	0.00313668	0.4244	317.841	Mannose-binding protein A OS=Rattus norvegicus OX=10116 GN=Mbl1 PE=1 SV=1
A0A0G2K509	591	0	62734.7	21	114	0.00137144	0.2453	315.519	Keratin, type II cytoskeletal 5 OS=Rattus norvegicus OX=10116 GN=Krt5 PE=1 SV=1
Q6P6Q2	576	0	61769.7	22	119	0.00146887	0.2257	310.844	Keratin, type II cytoskeletal 5 OS=Rattus norvegicus OX=10116 GN=Krt5 PE=1 SV=1
F7FFV2	395	0	43969.9	21	118	0.00212394	0.3089	309.028	Keratin, type II cytoskeletal 5 (Fragment) OS=Rattus norvegicus OX=10116 GN=Krt5 PE=1 SV=2
D3ZUU6	202	8	22274.1	8	86	0.00302695	0.4802	307.959	C-type lectin domain family 3, member B OS=Rattus norvegicus OX=10116 GN=Clec3b PE=1 SV=1
P20761	333	13	36456.2	16	105	0.00224183	0.4985	307.227	Ig gamma-2B chain C region OS=Rattus norvegicus OX=10116 GN=Igh-1a PE=1 SV=1
A0A0G2JU99	203	0	22881.3	8	88	0.00308209	0.3103	301.23	Selenoprotein P OS=Rattus norvegicus OX=10116 GN=Selenop PE=1 SV=1
A0A0G2JTW9	147	0	15960.3	8	108	0.00522353	0.5578	296.729	Beta-globin OS=Rattus norvegicus OX=10116 GN=Hbb-b1 PE=1 SV=1
A0A0H2UI19	603	0	66656.1	16	104	0.00122624	0.2952	293.119	Coagulation factor XII OS=Rattus norvegicus OX=10116 GN=F12 PE=1 SV=1; Additional IDs concatenated into MaxParsimony group: D3ZTE0; Additional IDs concatenated into MaxParsimony group: D3ZTE0
D3ZTE0	595	0	65782.7	16	104	0.00124272	0.2992	293.119	Coagulation factor XII OS=Rattus norvegicus OX=10116 GN=F12 PE=2 SV=1
Q7TP84	759	2	85982.9	21	110	0.00103041	0.2609	290.648	Plasminogen OS=Rattus norvegicus OX=10116 GN=Plg PE=1 SV=1
A0A3B0J380	257	1	27165.8	8	89	0.00246215	0.3268	290.369	Adiponectin c OS=Rattus norvegicus OX=10116 GN=Adic PE=4 SV=1; Additional IDs concatenated into MaxParsimony group: P31720; Additional IDs concatenated into MaxParsimony group: P31720
D3ZWD6	587	18	66212.3	18	96	0.00116276	0.3629	287.738	Complement C8 alpha chain OS=Rattus norvegicus OX=10116 GN=C8a PE=1 SV=1
P31720	245	0	25883.2	7	88	0.00255373	0.3429	287.736	Complement C1q subcomponent subunit A OS=Rattus norvegicus OX=10116 GN=C1qa PE=1 SV=2
contaminant_KERATIN17	590	3	62405.1	25	115	0.00138581	0.3136	287.713
Q99ME0	111	8	12133.6	8	96	0.00614903	0.5315	284.536	CXC chemokine RTCK1 OS=Rattus norvegicus OX=10116 GN=Ppbp PE=1 SV=1
Q65ZS7	336	0	38283.7	16	87	0.00184093	0.375	271.957	Rat apolipoprotein E protein OS=Rattus norvegicus OX=10116 PE=3 SV=1
A0A0G2K151	359	0	41155.8	16	87	0.00172299	0.351	271.957	Apolipoprotein E OS=Rattus norvegicus OX=10116 GN=Apoe PE=1 SV=1; Additional IDs concatenated into MaxParsimony group: Q65ZS7, Q6PAH0, P02650; Additional IDs concatenated into MaxParsimony group: Q65ZS7, P02650, Q6PAH0
Q6PAH0	312	0	35723.3	16	87	0.00198254	0.4038	271.957	Apolipoprotein E OS=Rattus norvegicus OX=10116 GN=Apoe PE=2 SV=1
P02650	312	0	35713.3	16	87	0.00198254	0.4038	271.957	Apolipoprotein E OS=Rattus norvegicus OX=10116 GN=Apoe PE=1 SV=2
contaminant_KERATIN05	471	0	51481.4	18	112	0.00169066	0.3121	267.147
P06765	105	6	11261.3	6	85	0.00575556	0.4476	253.141	Platelet factor 4 OS=Rattus norvegicus OX=10116 GN=Pf4 PE=1 SV=1
D4ACR1	121	4	13686.9	6	70	0.00411311	0.5537	245.345	Ig-like domain-containing protein OS=Rattus norvegicus OX=10116 PE=1 SV=2; Additional IDs concatenated into MaxParsimony group: M0R4X3, F1M3E9, M0R7Q2; Additional IDs concatenated into MaxParsimony group: M0R4X3, F1M3E9, M0R7Q2
Q6IRS6	393	0	43123.7	13	87	0.00157393	0.3766	243.263	Fetub protein OS=Rattus norvegicus OX=10116 GN=Fetub PE=1 SV=1; Additional IDs concatenated into MaxParsimony group: Q9QX79; Additional IDs concatenated into MaxParsimony group: Q9QX79
Q9QX79	378	0	41517.9	13	87	0.00163638	0.3915	243.263	Fetuin-B OS=Rattus norvegicus OX=10116 GN=Fetub PE=2 SV=2
P01946	142	0	15300.8	8	89	0.00445615	0.5845	242.863	Hemoglobin subunit alpha-1/2 OS=Rattus norvegicus OX=10116 GN=Hba1 PE=1 SV=3
A0A0G2JSV6	142	0	15256.8	8	89	0.00445615	0.5845	242.863	Globin c2 OS=Rattus norvegicus OX=10116 GN=Hba-a2 PE=1 SV=1; Additional IDs concatenated into MaxParsimony group: B1H216, P01946, G3V8R3, Q63910
B1H216	142	0	15300.8	8	89	0.00445615	0.5845	242.863	Globin c3 OS=Rattus norvegicus OX=10116 GN=Hba-a1 PE=2 SV=1; Additional IDs concatenated into MaxParsimony group: P01946, A0A0G2JSV6, Q63910, G3V8R3
P02651	391	1	44410.7	23	93	0.00169108	0.578	235.505	Apolipoprotein A-IV OS=Rattus norvegicus OX=10116 GN=Apoa4 PE=1 SV=2; Additional IDs concatenated into MaxParsimony group: A0A0G2JVX7; Additional IDs concatenated into MaxParsimony group: A0A0G2JVX7
A0A0G2JVX7	392	0	44316.7	22	91	0.00165049	0.5408	229.54	Apolipoprotein A-IV OS=Rattus norvegicus OX=10116 GN=Apoa4 PE=1 SV=1
contaminant_KERATIN21	357	1	39176.6	14	86	0.00171273	0.3501	228.5
G3V852	2541	17	269486	23	92	0.000257419	0.0937	226.483	RCG55135, isoform CRA_b OS=Rattus norvegicus OX=10116 GN=Tln1 PE=1 SV=1; Additional IDs concatenated into MaxParsimony group: D3ZA84, D4A3B0, Q498D4; Additional IDs concatenated into MaxParsimony group: D3ZA84, D4A3B0, Q498D4
P20767	104	7	11292.6	7	80	0.00546908	0.8365	224.635	Ig lambda-2 chain C region OS=Rattus norvegicus OX=10116 PE=4 SV=1
Q4V8L0	211	3	24191.8	14	95	0.0032011	0.5403	222.659	Metalloproteinase inhibitor 3 OS=Rattus norvegicus OX=10116 GN=Timp3 PE=1 SV=1; Additional IDs concatenated into MaxParsimony group: P48032; Additional IDs concatenated into MaxParsimony group: P48032
P48032	211	0	24191.8	11	92	0.00310001	0.4455	216.142	Metalloproteinase inhibitor 3 OS=Rattus norvegicus OX=10116 GN=Timp3 PE=2 SV=1
Q6IMF3	625	0	64773.1	9	78	0.000887304	0.0912	212.869	Keratin, type II cytoskeletal 1 OS=Rattus norvegicus OX=10116 GN=Krt1 PE=2 SV=1
A0A0G2JST3	625	0	64699.1	9	78	0.000887304	0.0912	212.869	Keratin, type II cytoskeletal 1 OS=Rattus norvegicus OX=10116 GN=Krt1 PE=1 SV=1
G3V7N9	253	1	26612.8	9	73	0.00205145	0.4269	211.46	Adiponectin a OS=Rattus norvegicus OX=10116 GN=C1qb PE=1 SV=1; Additional IDs concatenated into MaxParsimony group: P31721; Additional IDs concatenated into MaxParsimony group: P31721
P31721	253	0	26554.8	8	72	0.00202335	0.4269	209.682	Complement C1q subcomponent subunit B OS=Rattus norvegicus OX=10116 GN=C1qb PE=1 SV=2
contaminant_KERATIN08	469	2	50449.7	12	89	0.0013492	0.1919	201.559
Q4FZU2	552	0	59194.7	7	72	0.000927367	0.1268	201.448	Keratin, type II cytoskeletal 6A OS=Rattus norvegicus OX=10116 GN=Krt6a PE=1 SV=1
P09005	214	0	24184.7	10	71	0.00235886	0.3037	194.608	Serine protease inhibitor 2.1 (Fragment) OS=Rattus norvegicus OX=10116 PE=2 SV=1
A0A0G2QC06	979	0	107322	19	74	0.000537412	0.2074	193.322	Serotransferrin OS=Rattus norvegicus OX=10116 GN=Tf PE=1 SV=1; Additional IDs concatenated into MaxParsimony group: Q7TMC7, P12346, Q7TP24, Q64599; Additional IDs concatenated into MaxParsimony group: Q7TMC7, P12346, Q7TP24, Q64599
Q7TMC7	979	0	107325	19	74	0.000537412	0.2074	193.322	Ab2-417 OS=Rattus norvegicus OX=10116 PE=2 SV=1
P12346	698	0	76327.6	19	74	0.000753762	0.2908	193.322	Serotransferrin OS=Rattus norvegicus OX=10116 GN=Tf PE=1 SV=3
A2VCV7	685	2	75506.9	11	62	0.000643516	0.1708	190.819	Mannan-binding lectin serine peptidase 2 OS=Rattus norvegicus OX=10116 GN=Masp2 PE=1 SV=1; Additional IDs concatenated into MaxParsimony group: Q9JJS8, A0A0G2K392; Additional IDs concatenated into MaxParsimony group: Q9JJS8, A0A0G2K392
Q64240	349	7	38808	7	57	0.0011612	0.2464	187.871	Protein AMBP OS=Rattus norvegicus OX=10116 GN=Ambp PE=1 SV=1
Q9JJS8	685	0	75600	9	59	0.000612378	0.1708	186.382	Mannan-binding lectin serine protease 2 OS=Rattus norvegicus OX=10116 GN=Masp2 PE=1 SV=2
Q7TP24	980	0	107365	17	71	0.000515099	0.1929	185.802	Ba1-667 OS=Rattus norvegicus OX=10116 PE=2 SV=1
D4A8G5	685	16	74687.8	16	57	0.000591619	0.346	183.966	Transforming growth factor, beta-induced OS=Rattus norvegicus OX=10116 GN=Tgfbi PE=1 SV=2
Q6IFV1	485	0	52632.9	10	73	0.00107014	0.1979	182.181	Keratin, type I cytoskeletal 14 OS=Rattus norvegicus OX=10116 GN=Krt14 PE=2 SV=1
P63259	375	0	41747.8	17	71	0.00134612	0.5013	178.372	Actin, cytoplasmic 2 OS=Rattus norvegicus OX=10116 GN=Actg1 PE=1 SV=1
P60711	375	0	41691.7	17	71	0.00134612	0.5013	178.372	Actin, cytoplasmic 1 OS=Rattus norvegicus OX=10116 GN=Actb PE=1 SV=1
A0A0G2K3K2	378	0	42040.9	17	71	0.00133544	0.4974	178.372	Actin, cytoplasmic 1 OS=Rattus norvegicus OX=10116 GN=Actb PE=1 SV=1; Additional IDs concatenated into MaxParsimony group: P60711, P63259, A1Z0K8, P68035, B0BMT0, P62738, P63269, A0A0G2K4M6, A0A068F1Y2, D3ZRN3, Q99NC6, Q9JLX9, Q63030; Additional IDs concatenated into MaxParsimony group: P63259, P60711, A1Z0K8, P68136, P62738, B0BMT0, A0A0G2K4M6, P63269, A0A068F1Y2, D3ZRN3, Q99NC6, Q9JLX9, Q63030
P20059	460	13	51300.3	13	71	0.00109738	0.3	177.103	Hemopexin OS=Rattus norvegicus OX=10116 GN=Hpx PE=1 SV=3
A0A0G2K8K3	511	1	57968.4	14	69	0.000960033	0.2975	176.362	Heparin cofactor 2 OS=Rattus norvegicus OX=10116 GN=Serpind1 PE=1 SV=1; Additional IDs concatenated into MaxParsimony group: Q64268; Additional IDs concatenated into MaxParsimony group: Q64268
P97535	456	11	50151.7	11	64	0.000997868	0.3136	175.408	Phospholipase A1 member A OS=Rattus norvegicus OX=10116 GN=Pla1a PE=1 SV=1
Q64268	479	0	54498.9	13	68	0.00100933	0.3173	175.329	Heparin cofactor 2 OS=Rattus norvegicus OX=10116 GN=Serpind1 PE=1 SV=1
F1LRA5	1060	1	115725	13	68	0.000456101	0.116	173.488	Proteoglycan 4 OS=Rattus norvegicus OX=10116 GN=Prg4 PE=1 SV=2
P00762	246	4	25924.7	4	51	0.00147399	0.0813	171.354	Anionic trypsin-1 OS=Rattus norvegicus OX=10116 GN=Prss1 PE=1 SV=1
B0BNA0	445	1	49581.7	13	62	0.00099058	0.2584	164.949	Prg4 protein (Fragment) OS=Rattus norvegicus OX=10116 GN=Prg4 PE=2 SV=1
contaminant_INT-STD1	607	13	69207.4	14	63	0.000737921	0.2356	156.54	BSA
Q62975	436	14	50193.8	14	59	0.000962107	0.2615	154.715	Protein Z-dependent protease inhibitor OS=Rattus norvegicus OX=10116 GN=Serpina10 PE=2 SV=2
P55159	355	7	39315.1	7	49	0.000981354	0.3465	153.396	Serum paraoxonase/arylesterase 1 OS=Rattus norvegicus OX=10116 GN=Pon1 PE=1 SV=3
A0A0G2JW69	484	0	52831.8	5	56	0.000822623	0.0455	152.703	Keratin 79 (Fragment) OS=Rattus norvegicus OX=10116 GN=Krt79 PE=1 SV=1
Q63109	161	0	18018.8	7	52	0.00229634	0.3727	149.519	Coagulation factor X (Fragment) OS=Rattus norvegicus OX=10116 PE=3 SV=1
contaminant_KERATIN18	562	1	59767.2	10	54	0.000683149	0.1922	148.998
Q62669	147	1	15994.2	7	62	0.0029987	0.449	148.933	Beta-globin OS=Rattus norvegicus OX=10116 GN=LOC103694855 PE=1 SV=1
Q6IG05	542	0	58972.6	5	53	0.00069524	0.0904	148.024	Keratin, type II cytoskeletal 75 OS=Rattus norvegicus OX=10116 GN=Krt75 PE=3 SV=2
A0A0H2UHH5	573	0	62112.1	5	53	0.000657626	0.0855	148.024	Keratin, type II cytoskeletal 75 OS=Rattus norvegicus OX=10116 GN=Krt75 PE=1 SV=1
A0A0G2JT52	188	0	21681.6	10	55	0.00208	0.3723	147.672	Complement C4A (Fragment) OS=Rattus norvegicus OX=10116 GN=C4a PE=4 SV=1
Q63011	146	0	15878.2	6	61	0.00297054	0.4521	146.726	Zero beta-globin (Fragment) OS=Rattus norvegicus OX=10116 PE=3 SV=1
Q62670	147	0	15951.2	6	61	0.00295033	0.449	146.726	0 beta-2 globin OS=Rattus norvegicus OX=10116 GN=0 beta-2 globin PE=3 SV=1
Q6PDU6	147	0	16009.2	6	61	0.00295033	0.449	146.726	Beta-glo OS=Rattus norvegicus OX=10116 GN=Hbb-b1 PE=2 SV=1
Q6IG02	685	0	69067.2	8	58	0.000601999	0.0891	144.031	Keratin, type II cytoskeletal 2 epidermal OS=Rattus norvegicus OX=10116 GN=Krt2 PE=3 SV=1
A0A0G2JWX4	684	0	69045.2	8	58	0.000602879	0.0892	144.031	Keratin, type II cytoskeletal 2 epidermal OS=Rattus norvegicus OX=10116 GN=Krt2 PE=1 SV=1
Q5I0M1	345	3	38413.7	12	53	0.00109223	0.2928	143.779	Apolipoprotein H OS=Rattus norvegicus OX=10116 GN=Apoh PE=1 SV=1; Additional IDs concatenated into MaxParsimony group: P26644, Q3T940; Additional IDs concatenated into MaxParsimony group: P26644, Q3T940
contaminant_KERATIN12	431	0	47927	10	61	0.00100626	0.181	136.107
A1Z0K8	283	0	31708.9	12	52	0.0013064	0.4664	134.675	Beta-actin (Fragment) OS=Rattus norvegicus OX=10116 PE=2 SV=1
F1M8F5	410	0	46310	7	41	0.000710981	0.1195	134.476	Similar to BC049975 protein OS=Rattus norvegicus OX=10116 GN=LOC100909605 PE=3 SV=3
Q6IFU8	433	0	48075	10	60	0.000985193	0.1894	133.993	Keratin, type I cytoskeletal 17 OS=Rattus norvegicus OX=10116 GN=Krt17 PE=1 SV=1
A0A0G2K9Q9	447	0	49525.5	10	60	0.000954337	0.1834	133.993	Keratin, type I cytoskeletal 17 OS=Rattus norvegicus OX=10116 GN=Krt17 PE=1 SV=1
Q5U329	850	0	94276.9	13	54	0.000451682	0.1812	133.681	Anion exchange protein OS=Rattus norvegicus OX=10116 GN=Slc4a1 PE=1 SV=1
P23562	927	0	103089	13	54	0.000414164	0.1661	133.681	Band 3 anion transport protein OS=Rattus norvegicus OX=10116 GN=Slc4a1 PE=1 SV=3
Q91ZE7	849	0	94234.8	13	54	0.000452214	0.1814	133.681	Anion exchange protein OS=Rattus norvegicus OX=10116 PE=2 SV=1
F8WFT7	928	0	103160	13	54	0.000413717	0.1659	133.681	Anion exchange protein OS=Rattus norvegicus OX=10116 GN=Slc4a1 PE=1 SV=1; Additional IDs concatenated into MaxParsimony group: P23562, Q5U329, Q91ZE7; Additional IDs concatenated into MaxParsimony group: P23562, Q5U329, Q91ZE7
contaminant_KERATIN07	473	1	50864.8	7	58	0.000871816	0.1395	132.745
A0A096P6L9	1681	0	188943	15	48	0.000203017	0.1309	130.404	Complement C5 OS=Rattus norvegicus OX=10116 GN=C5 PE=1 SV=2; Additional IDs concatenated into MaxParsimony group: A0A1B0GWS5, A0A1B0GWQ4; Additional IDs concatenated into MaxParsimony group: A0A1B0GWS5, A0A1B0GWQ4
M0R590	333	0	35773.1	8	38	0.00081133	0.3123	129.727	Glyceraldehyde-3-phosphate dehydrogenase OS=Rattus norvegicus OX=10116 GN=LOC108351137 PE=3 SV=1; Additional IDs concatenated into MaxParsimony group: P04797, D3ZGY4, M0R660, Q0QEU1, E9PTN6, A0A0G2K8S2, E9PTV9, F1LUV3, D3ZWV2, F1M4G6, P97617, A0A0G2JYY8, Q498M9, D3ZME3, F1M2N4, F1LUI2, D3ZEN2, Q8K4T8
P04797	333	0	35787.2	8	38	0.00081133	0.3123	129.727	Glyceraldehyde-3-phosphate dehydrogenase OS=Rattus norvegicus OX=10116 GN=Gapdh PE=1 SV=3; Additional IDs concatenated into MaxParsimony group: M0R590, D3ZGY4, M0R660, Q0QEU1, E9PTN6, A0A0G2K8S2, E9PTV9, F1LUV3, D3ZWV2, F1M4G6, P97617, A0A0G2JYY8, Q498M9, D3ZME3, F1M2N4, F1LUI2, D3ZEN2, Q8K4T8
A0A096MIW4	79	0	8864.6	3	34	0.00305992	0.4937	128.271	Serpin family C member 1 (Fragment) OS=Rattus norvegicus OX=10116 GN=Serpinc1 PE=1 SV=1
B5DEH7	707	0	80355.2	10	44	0.000442478	0.1711	128.269	C1r protein OS=Rattus norvegicus OX=10116 GN=C1r PE=1 SV=1
M0RA79	99	5	10934.4	6	41	0.00294447	0.6162	127.12	Ig-like domain-containing protein OS=Rattus norvegicus OX=10116 PE=1 SV=1
D3ZGY4	333	0	35782.1	7	36	0.000768628	0.2883	126.36	Glyceraldehyde-3-phosphate dehydrogenase OS=Rattus norvegicus OX=10116 PE=1 SV=1
Q6IG01	519	0	57201.6	5	45	0.000616458	0.0424	126.217	Keratin, type II cytoskeletal 1b OS=Rattus norvegicus OX=10116 GN=Krt77 PE=3 SV=1
A0A0G2JZQ9	579	0	62028.8	5	45	0.000552576	0.038	126.217	Keratin, type II cytoskeletal 1b OS=Rattus norvegicus OX=10116 GN=Krt77 PE=3 SV=1
M0R660	333	0	35742.1	7	36	0.000768628	0.2703	125.585	Glyceraldehyde-3-phosphate dehydrogenase OS=Rattus norvegicus OX=10116 PE=1 SV=1
F1M3X3	117	4	12987.6	6	45	0.00273454	0.4188	124.832	Ig-like domain-containing protein OS=Rattus norvegicus OX=10116 PE=4 SV=2
Q498S9	568	0	62848.4	12	41	0.000513208	0.1972	121.829	LOC498793 protein (Fragment) OS=Rattus norvegicus OX=10116 GN=LOC498793 PE=2 SV=1
D4A1T6	660	2	75242.5	11	42	0.000452442	0.1652	121.414	Complement C1r OS=Rattus norvegicus OX=10116 GN=C1r PE=1 SV=3; Additional IDs concatenated into MaxParsimony group: Q4G030; Additional IDs concatenated into MaxParsimony group: Q4G030
A0A0G2JXJ9	442	0	47363.8	7	53	0.000852534	0.1154	120.834	Keratin, type I cytoskeletal 14 OS=Rattus norvegicus OX=10116 GN=Krt14 PE=1 SV=1
Q5EBA7	653	7	70672.9	8	39	0.000424629	0.1348	118.191	HGF activator OS=Rattus norvegicus OX=10116 GN=Hgfac PE=1 SV=1; Additional IDs concatenated into MaxParsimony group: O70197; Additional IDs concatenated into MaxParsimony group: O70197
A0A1B0GWS5	1350	0	150911	12	42	0.000221194	0.1356	116.754	Complement C5 (Fragment) OS=Rattus norvegicus OX=10116 GN=C5 PE=1 SV=1
Q6IFV3	447	0	48822.1	8	58	0.000922526	0.1029	114.789	Keratin, type I cytoskeletal 15 OS=Rattus norvegicus OX=10116 GN=Krt15 PE=1 SV=1
A0A0G2JY31	411	0	46074.5	10	47	0.000813044	0.2725	111.12	Alpha-1-antiproteinase OS=Rattus norvegicus OX=10116 GN=Serpina1 PE=1 SV=1
P17475	411	0	46088.5	10	47	0.000813044	0.2725	111.12	Alpha-1-antiproteinase OS=Rattus norvegicus OX=10116 GN=Serpina1 PE=1 SV=2
A0A0G2JZ73	415	0	46586.8	10	47	0.000805207	0.2699	111.12	Alpha-1-antiproteinase OS=Rattus norvegicus OX=10116 GN=Serpina1 PE=1 SV=1; Additional IDs concatenated into MaxParsimony group: P17475, A0A0G2JY31; Additional IDs concatenated into MaxParsimony group: P17475, A0A0G2JY31
Q6IFU7	452	0	50163.9	8	45	0.000707835	0.1748	109.256	Keratin, type I cytoskeletal 42 OS=Rattus norvegicus OX=10116 GN=Krt42 PE=3 SV=1
P31722	245	0	25651.7	6	37	0.00107373	0.3633	108.73	Complement C1q subcomponent subunit C OS=Rattus norvegicus OX=10116 GN=C1qc PE=1 SV=2
A0A3B0IYY4	268	0	28168.9	6	37	0.000981578	0.3321	108.73	Adiponectin b OS=Rattus norvegicus OX=10116 GN=Adib PE=4 SV=1; Additional IDs concatenated into MaxParsimony group: A0A0H2UHK1, P31722; Additional IDs concatenated into MaxParsimony group: A0A0H2UHK1, P31722
A0A0H2UHK1	248	0	26051.9	6	37	0.00106074	0.3589	108.73	Complement C1q subcomponent subunit C OS=Rattus norvegicus OX=10116 GN=C1qc PE=1 SV=1
Q63280	79	0	9371.6	7	38	0.00341991	0.5316	106.124	Keratin K5 (Fragment) OS=Rattus norvegicus OX=10116 GN=keratin K5 PE=3 SV=1
contaminant_KERATIN14	638	0	65812.1	6	45	0.000501476	0.058	105.742
O09016	126	1	14065.8	5	36	0.00203137	0.381	105.007	K-kininogen (Fragment) OS=Rattus norvegicus OX=10116 GN=Kngk PE=4 SV=1
D3ZPI8	164	6	18384.4	6	32	0.00138728	0.439	104.944	Complement C8 gamma chain OS=Rattus norvegicus OX=10116 GN=C8g PE=1 SV=1
Q0QEU1	238	0	25501.2	5	29	0.000866321	0.3109	104.93	Glyceraldehyde-3-phosphate dehydrogenase (Fragment) OS=Rattus norvegicus OX=10116 GN=GAPDH PE=2 SV=1
Q3T940	266	0	29356.4	6	34	0.000908773	0.3083	100.799	Apolipoprotein H (Fragment) OS=Rattus norvegicus OX=10116 GN=Apoh PE=2 SV=1
contaminant_KERATIN15	629	0	64453.6	5	42	0.000474741	0.0461	100.235
contaminant_KERATIN06	456	0	49119	5	47	0.000732809	0.0789	99.3512
A0A0G2JVA8	537	0	58042.1	3	35	0.000463395	0.054	99.179	Type II keratin Kb15 OS=Rattus norvegicus OX=10116 GN=Kb15 PE=3 SV=1
G3V908	532	0	57555.8	3	35	0.000467751	0.0545	99.179	Type II keratin Kb15 OS=Rattus norvegicus OX=10116 GN=Kb15 PE=2 SV=2
P68136	377	0	42005.8	11	44	0.000829792	0.2971	97.8237	Actin, alpha skeletal muscle OS=Rattus norvegicus OX=10116 GN=Acta1 PE=1 SV=1
P68035	377	0	41973.9	11	44	0.000829792	0.2971	97.8237	Actin, alpha cardiac muscle 1 OS=Rattus norvegicus OX=10116 GN=Actc1 PE=2 SV=1
Q9EQV8	457	8	51930.1	8	32	0.000497842	0.2166	95.6614	Carboxypeptidase N catalytic chain OS=Rattus norvegicus OX=10116 GN=Cpn1 PE=2 SV=1
Q64721	127	0	14733.7	7	36	0.00201538	0.5669	95.2019	Apolipoprotein BL (Fragment) OS=Rattus norvegicus OX=10116 GN=apo B PE=2 SV=1
M0R5R0	675	1	74545.6	7	39	0.000410789	0.0919	94.9634	Protein S (Alpha), isoform CRA_b OS=Rattus norvegicus OX=10116 GN=Pros1 PE=1 SV=1; Additional IDs concatenated into MaxParsimony group: P53813, Q62628; Additional IDs concatenated into MaxParsimony group: P53813, Q62628
P63269	376	0	41831.8	10	42	0.000794181	0.2686	93.3134	Actin, gamma-enteric smooth muscle OS=Rattus norvegicus OX=10116 GN=Actg2 PE=2 SV=1
P62738	377	0	41963.8	10	42	0.000792074	0.2679	93.3134	Actin, aortic smooth muscle OS=Rattus norvegicus OX=10116 GN=Acta2 PE=2 SV=1
B0BMT0	377	0	41963.8	10	42	0.000792074	0.2679	93.3134	RCG47746, isoform CRA_a OS=Rattus norvegicus OX=10116 GN=Acta2 PE=2 SV=1
A0A0G2K4M6	376	0	41879.7	10	42	0.000794181	0.2686	93.3134	Actin, aortic smooth muscle OS=Rattus norvegicus OX=10116 GN=Acta2 PE=3 SV=1
F1LSB2	497	1	57361.2	10	35	0.000500691	0.2153	93.2049	Angiopoietin 1, isoform CRA_a OS=Rattus norvegicus OX=10116 GN=Angpt1 PE=4 SV=2; Additional IDs concatenated into MaxParsimony group: O35460, Q548N6, Q91Z91; Additional IDs concatenated into MaxParsimony group: O35460, Q548N6, Q91Z91
P53813	675	0	74560.6	6	37	0.000389723	0.0919	92.363	Vitamin K-dependent protein S OS=Rattus norvegicus OX=10116 GN=Pros1 PE=2 SV=1
Q6IFU9	463	1	50727.7	6	38	0.000583527	0.0821	91.4205	Keratin 16 OS=Rattus norvegicus OX=10116 GN=Krt16 PE=1 SV=1
A0A0G2K7X7	846	6	93585.5	7	30	0.000252121	0.1064	91.1092	Complement C7 OS=Rattus norvegicus OX=10116 GN=C7 PE=1 SV=1; Additional IDs concatenated into MaxParsimony group: Q9ERF0; Additional IDs concatenated into MaxParsimony group: Q9ERF0
P01015	477	7	51930.9	7	35	0.000521684	0.1824	90.0924	Angiotensinogen OS=Rattus norvegicus OX=10116 GN=Agt PE=1 SV=1
Q6IFV0	491	0	52545.6	5	37	0.00053577	0.0774	89.748	Type I keratin KA11 OS=Rattus norvegicus OX=10116 GN=Ka11 PE=2 SV=1
Q62970	576	0	66702.5	10	33	0.000407333	0.2188	88.7696	Apolipoprotein B (Fragment) OS=Rattus norvegicus OX=10116 GN=apoB PE=4 SV=1
D4A2G6	1172	0	129626	3	31	0.000188058	0.0196	88.4525	Thrombospondin 2 OS=Rattus norvegicus OX=10116 GN=Thbs2 PE=4 SV=2
Q6IG00	536	0	57613	4	36	0.000477525	0.0522	87.4005	Keratin, type II cytoskeletal 4 OS=Rattus norvegicus OX=10116 GN=Krt4 PE=3 SV=1
A0A0G2K6P7	526	0	56505.4	4	36	0.000486603	0.0532	87.4005	Keratin, type II cytoskeletal 4 OS=Rattus norvegicus OX=10116 GN=Krt4 PE=3 SV=1
A0A0G2JUG1	538	0	57405.7	3	30	0.000396458	0.052	87.1824	IF rod domain-containing protein OS=Rattus norvegicus OX=10116 PE=3 SV=1
Q10758	483	0	53967.3	5	36	0.000529924	0.0393	86.3666	Keratin, type II cytoskeletal 8 OS=Rattus norvegicus OX=10116 GN=Krt8 PE=1 SV=3
P62632	463	3	50404.3	6	32	0.000491391	0.2052	81.9492	Elongation factor 1-alpha 2 OS=Rattus norvegicus OX=10116 GN=Eef1a2 PE=1 SV=1; Additional IDs concatenated into MaxParsimony group: M0R757, F1M6C2; Additional IDs concatenated into MaxParsimony group: P62630, F1M6C2
Q9ERD1	218	0	24897.2	8	29	0.0009458	0.3624	79.7896	Clusterin (Fragment) OS=Rattus norvegicus OX=10116 PE=2 SV=1
P05371	447	0	51324.3	8	29	0.000461263	0.1767	79.7896	Clusterin OS=Rattus norvegicus OX=10116 GN=Clu PE=1 SV=2; Additional IDs concatenated into MaxParsimony group: Q6P7S6, G3V836, Q9ERD1, A0A0G2KB42, O35510
G3V836	447	0	51369.3	8	29	0.000461263	0.1767	79.7896	Clusterin OS=Rattus norvegicus OX=10116 GN=Clu PE=1 SV=1; Additional IDs concatenated into MaxParsimony group: P05371, Q6P7S6, Q9ERD1, O35510, A0A0G2KB42
Q6P7S6	447	0	51413.4	8	29	0.000461263	0.1767	79.7896	Clusterin OS=Rattus norvegicus OX=10116 GN=Clu PE=2 SV=1
P26644	297	0	33157.1	7	33	0.000789979	0.2155	79.3662	Beta-2-glycoprotein 1 OS=Rattus norvegicus OX=10116 GN=Apoh PE=2 SV=2
A0A0G2JZS9	97	3	10786.2	3	31	0.00227221	0.3814	79.227	Ig-like domain-containing protein OS=Rattus norvegicus OX=10116 PE=1 SV=1
F1LR92	419	0	46793.5	7	30	0.000509056	0.1504	78.5383	Serine protease inhibitor A3M OS=Rattus norvegicus OX=10116 GN=Serpina3m PE=1 SV=3
Q63556	412	0	46048.1	7	30	0.000517705	0.1529	78.5383	Serine protease inhibitor A3M (Fragment) OS=Rattus norvegicus OX=10116 GN=Serpina3m PE=2 SV=1
H6X2V2	230	0	25341.7	3	31	0.000958279	0.1391	77.8681	Pentaxin OS=Rattus norvegicus OX=10116 GN=crp PE=3 SV=1
H6X2W4	230	0	25401.7	3	31	0.000958279	0.1391	77.8681	Pentaxin OS=Rattus norvegicus OX=10116 GN=crp PE=3 SV=1
H6X2W6	230	0	25429.7	3	31	0.000958279	0.1391	77.8681	Pentaxin OS=Rattus norvegicus OX=10116 GN=crp PE=3 SV=1
H6X2V7	230	0	25431.7	3	31	0.000958279	0.1391	77.8681	Pentaxin OS=Rattus norvegicus OX=10116 GN=crp PE=3 SV=1
H6X2V4	230	0	25467.7	3	31	0.000958279	0.1391	77.8681	Pentaxin OS=Rattus norvegicus OX=10116 GN=crp PE=3 SV=1
H6X2X0	230	0	25407.7	3	31	0.000958279	0.1391	77.8681	Pentaxin OS=Rattus norvegicus OX=10116 GN=crp PE=3 SV=1
H6X2V9	230	0	25445.8	3	31	0.000958279	0.1391	77.8681	Pentaxin OS=Rattus norvegicus OX=10116 GN=crp PE=3 SV=1
H6X2W7	230	0	25407.7	3	31	0.000958279	0.1391	77.8681	Pentaxin OS=Rattus norvegicus OX=10116 GN=crp PE=3 SV=1
H6X2V8	230	0	25463.7	3	31	0.000958279	0.1391	77.8681	Pentaxin OS=Rattus norvegicus OX=10116 GN=crp PE=3 SV=1
P48199	230	0	25433.7	3	31	0.000958279	0.1391	77.8681	C-reactive protein OS=Rattus norvegicus OX=10116 GN=Crp PE=1 SV=1
H6X2W2	230	0	25409.6	3	31	0.000958279	0.1391	77.8681	Pentaxin OS=Rattus norvegicus OX=10116 GN=crp PE=3 SV=1
Q7TMA9	1015	0	116369	3	31	0.000217147	0.0315	77.8681	Aa1249 OS=Rattus norvegicus OX=10116 PE=2 SV=1
H6X2W3	230	0	25417.7	3	31	0.000958279	0.1391	77.8681	Pentaxin OS=Rattus norvegicus OX=10116 GN=crp PE=3 SV=1
H6X2W1	230	0	25408.6	3	31	0.000958279	0.1391	77.8681	Pentaxin OS=Rattus norvegicus OX=10116 GN=crp PE=3 SV=1
A0A0G2K8V5	1017	0	116413	3	31	0.00021672	0.0315	77.8681	C-reactive protein OS=Rattus norvegicus OX=10116 GN=Crp PE=1 SV=1; Additional IDs concatenated into MaxParsimony group: Q7TMA9, H6X2X0, H6X2V7, H6X2W6, H6X2W4, H6X2W7, H6X2W2, P48199, H6X2V2, H6X2W5, H6X2W1, H6X2W3, H6X2V8, H6X2V9, H6X2V4, H6X2V3, H6X2W0; Additional IDs concatenated into MaxParsimony group: Q7TMA9, H6X2W6, H6X2W3, H6X2W1, H6X2W5, H6X2V2, P48199, H6X2V8, H6X2W7, H6X2V9, H6X2V4, H6…
H6X2W5	230	0	25433.7	3	31	0.000958279	0.1391	77.8681	Pentaxin OS=Rattus norvegicus OX=10116 GN=Crp PE=3 SV=1
Q68FR2	507	8	55066.7	8	24	0.000336559	0.217	76.5991	Bridging integrator 2 OS=Rattus norvegicus OX=10116 GN=Bin2 PE=1 SV=1
contaminant_KERATIN20	483	0	53697.1	4	30	0.000441603	0.0207	72.8435
D3ZJW6	117	1	13036.6	3	25	0.00151919	0.2991	72.7528	RCG21066 OS=Rattus norvegicus OX=10116 GN=rCG_21066 PE=1 SV=1
Q7TPA5	422	6	46976.6	6	27	0.000454893	0.1919	71.9876	Serpin A11 OS=Rattus norvegicus OX=10116 GN=Serpina11 PE=2 SV=2
A0A068F1Y2	186	0	20408.1	6	28	0.00107029	0.3871	70.8724	Beta-actin (Fragment) OS=Rattus norvegicus OX=10116 GN=Actb PE=2 SV=1
Q63279	403	0	44590.6	5	37	0.000652762	0.0893	69.9775	Keratin, type I cytoskeletal 19 OS=Rattus norvegicus OX=10116 GN=Krt19 PE=1 SV=2
contaminant_KERATIN10	400	0	44061.1	5	37	0.000657657	0.09	69.9775
M0R757	462	0	50058.1	4	28	0.000430898	0.0931	69.6773	Elongation factor 1-alpha OS=Rattus norvegicus OX=10116 GN=LOC100360413 PE=3 SV=1
P62630	462	0	50064.1	4	28	0.000430898	0.0931	69.6773	Elongation factor 1-alpha 1 OS=Rattus norvegicus OX=10116 GN=Eef1a1 PE=2 SV=1
O35460	497	0	57406.1	8	28	0.000400553	0.1871	69.4529	Angiopoietin-1 OS=Rattus norvegicus OX=10116 GN=Angpt1 PE=2 SV=2
A0A0G2JW41	118	1	13004.3	2	19	0.0011448	0.2627	67.3447	Ig-like domain-containing protein OS=Rattus norvegicus OX=10116 PE=1 SV=1
M0R8Q9	117	0	12820.4	3	25	0.00151919	0.2051	66.7961	Ig-like domain-containing protein OS=Rattus norvegicus OX=10116 PE=4 SV=2
A0A0G2K304	116	0	12563.4	3	25	0.00153229	0.2069	66.7961	Ig-like domain-containing protein OS=Rattus norvegicus OX=10116 PE=4 SV=1
A0A0G2K4A4	116	0	12666.3	3	25	0.00153229	0.2069	66.7961	Ig-like domain-containing protein OS=Rattus norvegicus OX=10116 PE=4 SV=1
A0A0G2K290	124	0	13877.7	3	25	0.00143343	0.1935	66.7961	Ig-like domain-containing protein OS=Rattus norvegicus OX=10116 PE=4 SV=1
F1LYU3	113	0	12275.9	3	25	0.00157297	0.2124	66.7961	Ig-like domain-containing protein OS=Rattus norvegicus OX=10116 PE=4 SV=2
A0A0G2JWW4	117	0	12868.4	3	25	0.00151919	0.2051	66.7961	Ig-like domain-containing protein OS=Rattus norvegicus OX=10116 PE=4 SV=1
A0A0G2JT95	135	0	14874.5	3	25	0.00131663	0.1778	66.7961	Ig-like domain-containing protein OS=Rattus norvegicus OX=10116 PE=4 SV=1
A0A0G2K3A6	110	0	12206.9	3	25	0.00161587	0.2182	66.7961	Ig-like domain-containing protein OS=Rattus norvegicus OX=10116 PE=4 SV=1
M0RBL2	117	0	12803.1	3	25	0.00151919	0.2051	66.7961	Ig-like domain-containing protein OS=Rattus norvegicus OX=10116 PE=4 SV=1
F7FMY6	482	0	53962.2	4	24	0.000354015	0.0871	66.2114	Protein C, isoform CRA_b OS=Rattus norvegicus OX=10116 GN=Proc PE=1 SV=1; Additional IDs concatenated into MaxParsimony group: P31394, Q68FY8; Additional IDs concatenated into MaxParsimony group: P31394, Q68FY8
P31394	461	0	51860.3	4	24	0.000370142	0.0911	66.2114	Vitamin K-dependent protein C OS=Rattus norvegicus OX=10116 GN=Proc PE=2 SV=1
Q68FY8	461	0	51775.2	4	24	0.000370142	0.0911	66.2114	Protein C OS=Rattus norvegicus OX=10116 GN=Proc PE=2 SV=1
Q6IFV4	438	0	47681.3	3	29	0.000470741	0.0685	65.4938	Keratin, type I cytoskeletal 13 OS=Rattus norvegicus OX=10116 GN=Krt13 PE=3 SV=1
Q9Z1G8	148	0	15971.9	2	20	0.000960785	0.2635	65.3897	Fibronectin (Fragment) OS=Rattus norvegicus OX=10116 PE=4 SV=1
A0A0U1RRP9	1115	1	123874	8	22	0.000140283	0.0798	65.0441	Complement factor B OS=Rattus norvegicus OX=10116 GN=Cfb PE=1 SV=1; Additional IDs concatenated into MaxParsimony group: Q7TP05, G3V615, Q6MG74; Additional IDs concatenated into MaxParsimony group: Q7TP05, G3V615, Q6MG74
G3V615	763	0	85280.7	7	21	0.000195683	0.1166	63.7068	Complement factor B OS=Rattus norvegicus OX=10116 GN=Cfb PE=1 SV=1
Q7TP05	1116	0	123942	7	21	0.000133787	0.0797	63.7068	Complement factor B OS=Rattus norvegicus OX=10116 GN=Cfb PE=1 SV=1
Q6MG74	761	0	85048.6	7	21	0.000196197	0.117	63.7068	B-factor, properdin OS=Rattus norvegicus OX=10116 GN=Cfb PE=2 SV=1
A0A0H2UHA1	704	0	80043.5	5	24	0.00024238	0.1037	62.8828	Mannan-binding lectin serine protease 1 OS=Rattus norvegicus OX=10116 GN=Masp1 PE=1 SV=1; Additional IDs concatenated into MaxParsimony group: Q8CHN8, Q8CG43; Additional IDs concatenated into MaxParsimony group: Q8CHN8, Q8CG43
Q8CHN8	704	0	80027.5	5	24	0.00024238	0.1037	62.8828	Mannan-binding lectin serine protease 1 OS=Rattus norvegicus OX=10116 GN=Masp1 PE=1 SV=2
Q6IFZ5	581	0	61702.5	3	24	0.000293693	0.0482	60.8905	Keratin 76 OS=Rattus norvegicus OX=10116 GN=Krt76 PE=2 SV=1
P19939	88	1	9836.3	4	28	0.00226221	0.4205	59.9861	Apolipoprotein C-I OS=Rattus norvegicus OX=10116 GN=Apoc1 PE=3 SV=1; Additional IDs concatenated into MaxParsimony group: A0A0G2K9R5, M0R547; Additional IDs concatenated into MaxParsimony group: A0A0G2K9R5, M0R547
F1LXY6	100	4	11221.5	4	24	0.00170635	0.36	59.7459	Ig-like domain-containing protein OS=Rattus norvegicus OX=10116 PE=1 SV=2
Q91WX0	699	2	78240.1	9	30	0.000305142	0.1545	59.5498	Complement factor H-related protein OS=Rattus norvegicus OX=10116 PE=2 SV=2; Additional IDs concatenated into MaxParsimony group: G3V9R2, F1M983, A0A0G2K975, Q5XJW6, Q5FVP9; Additional IDs concatenated into MaxParsimony group: G3V9R2, F1M983, A0A0G2K975, Q5XJW6, Q5FVP9
Q63223	51	0	5575.9	2	24	0.00334579	0.4118	59.3721	Rat hemoglobin beta-chain (Fragment) OS=Rattus norvegicus OX=10116 PE=2 SV=1
A0A0G2JXH6	539	0	58726.6	2	18	0.000237433	0.0371	58.8803	Keratin, type II cytoskeletal 73 OS=Rattus norvegicus OX=10116 GN=Krt73 PE=1 SV=1
Q6IG03	553	0	60331.4	2	18	0.000231422	0.0362	58.8803	Keratin, type II cytoskeletal 73 OS=Rattus norvegicus OX=10116 GN=Krt73 PE=1 SV=1
Q63052	989	1	113217	10	24	0.000172533	0.1143	58.4253	Apolipoprotein B (Fragment) OS=Rattus norvegicus OX=10116 GN=apoB PE=2 SV=1
Q62628	346	0	38055.4	4	22	0.000452069	0.1329	56.5238	Protein S (Fragment) OS=Rattus norvegicus OX=10116 PE=2 SV=1
D4A3B0	2375	0	253467	4	21	6.28657e-05	0.0143	55.7997	Talin 2 OS=Rattus norvegicus OX=10116 GN=Tln2 PE=1 SV=3
D3ZA84	2542	0	271496	4	21	5.87356e-05	0.0134	55.7997	Talin 2 OS=Rattus norvegicus OX=10116 GN=Tln2 PE=1 SV=3
F1LZ11	124	4	14039.7	4	17	0.000974732	0.3871	55.1848	Ig-like domain-containing protein OS=Rattus norvegicus OX=10116 PE=1 SV=1
A0A0G2JWB6	1475	0	165311	7	19	9.1584e-05	0.0698	54.7462	Peroxidasin OS=Rattus norvegicus OX=10116 GN=Pxdn PE=4 SV=1; Additional IDs concatenated into MaxParsimony group: A0A0G2KAH2; Additional IDs concatenated into MaxParsimony group: A0A0G2KAH2
A0A0G2KAH2	1237	0	138062	7	19	0.000109205	0.0833	54.7462	Peroxidasin OS=Rattus norvegicus OX=10116 GN=Pxdn PE=4 SV=1
M0RDF2	99	2	11158.4	5	20	0.00143633	0.4646	54.2809	Ig-like domain-containing protein OS=Rattus norvegicus OX=10116 PE=1 SV=1; Additional IDs concatenated into MaxParsimony group: P01805, F1M3H2; Additional IDs concatenated into MaxParsimony group: P01805, F1M3H2
M0R5S4	118	0	13185.4	2	19	0.0011448	0.2034	54.025	Ig-like domain-containing protein OS=Rattus norvegicus OX=10116 PE=4 SV=1
A0A0G2JUY4	110	0	12394	2	19	0.00122806	0.2182	54.025	Ig-like domain-containing protein OS=Rattus norvegicus OX=10116 PE=1 SV=1
A0A0G2JYX2	118	0	12836.1	2	19	0.0011448	0.2034	54.025	Ig-like domain-containing protein OS=Rattus norvegicus OX=10116 PE=1 SV=1
Q99NC6	134	0	14955.4	5	21	0.00111422	0.5075	53.7386	Beta-actin FE-3 (Fragment) OS=Rattus norvegicus OX=10116 PE=2 SV=1
A0A0G2JU48	435	0	46372.9	2	19	0.000310543	0.0506	53.4424	Type I keratin KA11 OS=Rattus norvegicus OX=10116 GN=Ka11 PE=3 SV=1
A0A0G2JW58	298	0	33466.4	2	19	0.00045331	0.0738	53.4424	Type I keratin KA11 (Fragment) OS=Rattus norvegicus OX=10116 GN=Ka11 PE=3 SV=1
H6X2V3	230	0	25447.7	2	19	0.000587332	0.0957	52.8722	Pentaxin OS=Rattus norvegicus OX=10116 GN=crp PE=3 SV=1
H6X2W0	230	0	25251.6	2	19	0.000587332	0.0957	52.8722	Pentaxin OS=Rattus norvegicus OX=10116 GN=crp PE=3 SV=1
A0A5C5	258	1	28588.8	6	25	0.000688935	0.155	51.781	C4b-binding protein beta chain OS=Rattus norvegicus OX=10116 GN=C4bpb PE=1 SV=1; Additional IDs concatenated into MaxParsimony group: Q63515; Additional IDs concatenated into MaxParsimony group: Q63515
F1M6C2	410	0	44256.7	3	22	0.000381502	0.0756	51.1081	Tr-type G domain-containing protein OS=Rattus norvegicus OX=10116 PE=1 SV=1
Q63515	258	0	28604.8	5	24	0.000661378	0.155	49.2723	C4b-binding protein beta chain OS=Rattus norvegicus OX=10116 GN=C4bpb PE=2 SV=1
Q63282	26	0	3087.5	1	18	0.00492218	0.3846	49.095	Keratin K6 (Fragment) OS=Rattus norvegicus OX=10116 GN=keratin K6 PE=4 SV=1
A0A0G2K9R5	69	0	7539.1	3	22	0.0022669	0.4058	48.7632	Apolipoprotein C-I OS=Rattus norvegicus OX=10116 GN=Apoc1 PE=4 SV=1
Q91YB6	1236	0	140234	7	22	0.00012655	0.0663	48.5207	Complement inhibitory factor H OS=Rattus norvegicus OX=10116 GN=Cfh PE=2 SV=1
Q6P6T1	688	1	77003.8	5	19	0.000196347	0.0974	48.3694	Complement C1s subcomponent OS=Rattus norvegicus OX=10116 GN=C1s PE=2 SV=2; Additional IDs concatenated into MaxParsimony group: G3V7L3, D4A1S0; Additional IDs concatenated into MaxParsimony group: G3V7L3, D4A1S0
Q71DI1	110	4	11258.8	4	18	0.00116342	0.3	48.0766	Dermcidin OS=Rattus norvegicus OX=10116 PE=2 SV=1
M0R4X3	96	0	10682.2	3	18	0.00133309	0.1875	48.0064	Ig-like domain-containing protein OS=Rattus norvegicus OX=10116 PE=1 SV=1
Q4G030	364	0	41085.2	7	21	0.000410181	0.1978	47.4691	C1r protein (Fragment) OS=Rattus norvegicus OX=10116 GN=C1r PE=2 SV=1
P01805	142	0	15995.9	3	17	0.000851174	0.1761	47.3807	Ig heavy chain V region IR2 OS=Rattus norvegicus OX=10116 PE=4 SV=1
Q5RK13	127	1	14079	4	12	0.000671793	0.3465	45.9927	Igf1 protein OS=Rattus norvegicus OX=10116 GN=Igf1 PE=2 SV=2; Additional IDs concatenated into MaxParsimony group: F8WFZ5, P08025, A0A0G2JX40; Additional IDs concatenated into MaxParsimony group: F8WFZ5, P08025, A0A0G2JX40
P0CG51	305	0	34329.5	4	19	0.000442906	0.141	44.689	Polyubiquitin-B OS=Rattus norvegicus OX=10116 GN=Ubb PE=1 SV=1
contaminant_UBIQUITIN08	76	0	8541.6	4	19	0.00177745	0.5658	44.689
Q6P7R7	128	0	14700.9	4	19	0.00105536	0.3359	44.689	Ubiquitin A-52 residue ribosomal protein fusion product 1 OS=Rattus norvegicus OX=10116 GN=Uba52 PE=2 SV=1
Q63654	100	0	11216	4	19	0.00135086	0.43	44.689	Polyubiquitin (Fragment) OS=Rattus norvegicus OX=10116 GN=UBC PE=2 SV=1
F1LML2	810	0	90999	4	19	0.000166773	0.0531	44.689	Polyubiquitin-C OS=Rattus norvegicus OX=10116 GN=Ubc PE=4 SV=1; Additional IDs concatenated into MaxParsimony group: Q63429, Q5FWT0, P0CG51, P62982, Q6PED0, Q6P7R7, P62986, Q63654, contaminant_UBIQUITIN08, F1LU69, F1M927, D4A0J6
Q63429	810	0	91013	4	19	0.000166773	0.0531	44.689	Polyubiquitin-C OS=Rattus norvegicus OX=10116 GN=Ubc PE=1 SV=1; Additional IDs concatenated into MaxParsimony group: F1LML2, Q5FWT0, P0CG51, Q6PED0, P62982, P62986, Q6P7R7, Q63654, contaminant_UBIQUITIN08, F1LU69, F1M927, D4A0J6
P62986	128	0	14700.9	4	19	0.00105536	0.3359	44.689	Ubiquitin-60S ribosomal protein L40 OS=Rattus norvegicus OX=10116 GN=Uba52 PE=1 SV=2
Q6PED0	156	0	17921.5	4	19	0.000865938	0.2756	44.689	RCG23287, isoform CRA_a OS=Rattus norvegicus OX=10116 GN=Rps27a PE=2 SV=1
Q5FWT0	656	0	73656.7	4	19	0.000205924	0.0655	44.689	Ubc protein (Fragment) OS=Rattus norvegicus OX=10116 GN=Ubc PE=2 SV=1
P62982	156	0	17921.5	4	19	0.000865938	0.2756	44.689	Ubiquitin-40S ribosomal protein S27a OS=Rattus norvegicus OX=10116 GN=Rps27a PE=1 SV=2
E9PTN6	333	0	35974.3	4	15	0.000320262	0.1351	44.5249	Glyceraldehyde-3-phosphate dehydrogenase OS=Rattus norvegicus OX=10116 PE=3 SV=1
A0A0G2K392	184	0	20817.1	3	15	0.000579604	0.2717	44.3398	Mannan-binding lectin serine protease 2 OS=Rattus norvegicus OX=10116 GN=Masp2 PE=4 SV=1
Q8CG43	697	0	78157.7	3	19	0.000193811	0.0502	44.1966	MASP-3 protein (Fragment) OS=Rattus norvegicus OX=10116 GN=masp1-3 PE=3 SV=1
P08025	153	0	17049.6	3	11	0.000511163	0.2876	43.9589	Insulin-like growth factor I OS=Rattus norvegicus OX=10116 GN=Igf1 PE=1 SV=3
F8WFZ5	159	0	17929.3	3	11	0.000491874	0.2767	43.9589	Insulin-like growth factor 1, isoform CRA_b OS=Rattus norvegicus OX=10116 GN=Igf1 PE=1 SV=2
A0A0G2JX40	143	0	16046.2	3	11	0.000546908	0.3077	43.9589	Insulin-like growth factor I OS=Rattus norvegicus OX=10116 GN=Igf1 PE=1 SV=1
Q71RP1	536	1	60423.6	5	20	0.000265291	0.1175	43.1121	Heparanase OS=Rattus norvegicus OX=10116 GN=Hpse PE=2 SV=1; Additional IDs concatenated into MaxParsimony group: F1M581; Additional IDs concatenated into MaxParsimony group: F1M581
contaminant_KERATIN04	458	0	49595.4	2	17	0.000263901	0.0502	42.7694
Q9EQV9	422	5	48777.5	5	23	0.000387502	0.1327	42.0863	Carboxypeptidase B2 OS=Rattus norvegicus OX=10116 GN=Cpb2 PE=2 SV=1
F1LU69	150	0	17105.9	3	17	0.000805779	0.2267	41.8108	Ubiquitin-like domain-containing protein OS=Rattus norvegicus OX=10116 GN=Rps27a-ps28 PE=4 SV=3
D3ZRN3	376	0	41917.9	5	20	0.000378181	0.1117	41.7217	Actin, beta-like 2 OS=Rattus norvegicus OX=10116 GN=Actbl2 PE=1 SV=1
P06238	1472	0	163664	4	16	7.72805e-05	0.0204	41.6755	Alpha-2-macroglobulin OS=Rattus norvegicus OX=10116 GN=A2m PE=2 SV=2
A0A0G2K3L5	115	0	12811.3	2	12	0.000741893	0.2696	41.6574	Ig-like domain-containing protein OS=Rattus norvegicus OX=10116 PE=4 SV=1
A0A0G2JXF0	108	0	11775.8	2	12	0.000789979	0.287	41.6574	Ig-like domain-containing protein OS=Rattus norvegicus OX=10116 PE=1 SV=1
P27139	260	3	29077.6	3	14	0.000382836	0.1346	41.1958	Carbonic anhydrase 2 OS=Rattus norvegicus OX=10116 GN=Ca2 PE=1 SV=2
G3V7P5	699	1	78227.1	7	21	0.000213599	0.0901	40.1307	RCG46174 OS=Rattus norvegicus OX=10116 GN=RGD1564614 PE=1 SV=1
A0A0G2JY98	140	1	15353.8	3	13	0.000660197	0.2714	40.0839	Ig-like domain-containing protein OS=Rattus norvegicus OX=10116 PE=1 SV=1; Additional IDs concatenated into MaxParsimony group: A0A0G2K9Z5, F1LYF1; Additional IDs concatenated into MaxParsimony group: A0A0G2K9Z5, F1LYF1
F1M983	1234	0	139898	6	18	0.000103709	0.0551	39.8606	Complement factor H OS=Rattus norvegicus OX=10116 GN=Cfh PE=1 SV=1
G3V9R2	1235	0	140121	6	18	0.000103625	0.0551	39.8606	Complement factor H OS=Rattus norvegicus OX=10116 GN=Cfh PE=1 SV=1
B2GVB9	665	8	75556.9	8	15	0.000160372	0.1895	39.8263	Fermitin family member 3 OS=Rattus norvegicus OX=10116 GN=Fermt3 PE=1 SV=1
contaminant_NRL_1INDH	213	0	22606.4	2	13	0.000433932	0.0563	39.5778	Cha255 immunoglobulin fab' fragment (igg1-lambda) complex With...
contaminant_NRL_1IKFH	228	0	24722.2	2	13	0.000405384	0.0526	39.5778	Immunoglobulin igg1-kappa antibody fragment fab complexed With...
F1M4G6	319	0	33944.9	2	12	0.000267454	0.0909	39.4384	Gp_dh_N domain-containing protein OS=Rattus norvegicus OX=10116 PE=3 SV=1
A0A0G2K8S2	335	0	35911.2	2	12	0.00025468	0.0866	39.4384	Gp_dh_N domain-containing protein OS=Rattus norvegicus OX=10116 PE=1 SV=1
A0A0G2K828	119	1	13195.6	2	15	0.000896195	0.1681	39.1929	Ig-like domain-containing protein OS=Rattus norvegicus OX=10116 PE=4 SV=1
A0A0G2K473	117	0	12957.4	1	13	0.000789979	0.1111	38.7676	Ig-like domain-containing protein OS=Rattus norvegicus OX=10116 PE=4 SV=1
F1M0H4	118	0	13168.2	1	13	0.000783284	0.1102	38.7676	Ig-like domain-containing protein OS=Rattus norvegicus OX=10116 PE=4 SV=2
A0A0G2K758	166	0	18191.1	1	13	0.000556792	0.0783	38.7676	Ig-like domain-containing protein OS=Rattus norvegicus OX=10116 PE=4 SV=1
D3ZE00	98	0	10824.2	1	13	0.000943138	0.1327	38.7676	Ig-like domain-containing protein OS=Rattus norvegicus OX=10116 PE=1 SV=3
M0R3Y4	118	0	12816.9	1	13	0.000783284	0.1102	38.7676	Ig-like domain-containing protein OS=Rattus norvegicus OX=10116 PE=4 SV=1
A0A0G2K975	764	0	85734.8	6	20	0.000186121	0.0825	38.7357	Similar to complement factor H-related protein OS=Rattus norvegicus OX=10116 GN=RGD1564614 PE=1 SV=1
B0BNN3	261	5	28264.2	5	13	0.000354128	0.3027	38.6628	Carbonic anhydrase 1 OS=Rattus norvegicus OX=10116 GN=Ca1 PE=1 SV=1
Q548N6	110	0	12833.7	2	12	0.000775616	0.2182	37.5009	Angiopoietin-1 (Fragment) OS=Rattus norvegicus OX=10116 PE=2 SV=1
Q91Z91	89	0	10194.4	2	12	0.000958626	0.2697	37.5009	Angiopoietin 1 (Fragment) OS=Rattus norvegicus OX=10116 PE=2 SV=1
A0A0G2KB42	295	0	34134.4	2	12	0.000289213	0.0915	36.5958	Clusterin OS=Rattus norvegicus OX=10116 GN=Clu PE=1 SV=1
O35510	295	0	34075.3	2	12	0.000289213	0.0915	36.5958	Clusterin OS=Rattus norvegicus OX=10116 PE=2 SV=1
G3V7L3	694	0	77645.1	4	15	0.00015367	0.0735	36.5825	Complement C1s subcomponent OS=Rattus norvegicus OX=10116 GN=C1s PE=1 SV=1
Q9JLX9	97	0	10988.4	2	12	0.000879564	0.299	35.5826	Beta actin (Fragment) OS=Rattus norvegicus OX=10116 PE=2 SV=1
D4A8F2	277	7	31299.5	7	14	0.000359341	0.2996	35.5792	Ras suppressor protein 1 OS=Rattus norvegicus OX=10116 GN=Rsu1 PE=1 SV=3
F1M4R1	115	1	13124.6	2	9	0.00055642	0.2609	35.1132	Ig-like domain-containing protein OS=Rattus norvegicus OX=10116 PE=4 SV=1; Additional IDs concatenated into MaxParsimony group: A0A0G2K4I8; Additional IDs concatenated into MaxParsimony group: A0A0G2K4I8
Q5XJW6	689	0	78609.9	5	16	0.000165104	0.074	34.9935	Cfh protein OS=Rattus norvegicus OX=10116 GN=Cfh PE=1 SV=1
Q63910	142	0	15497	2	16	0.000801105	0.0634	33.9109	Alpha globin OS=Rattus norvegicus OX=10116 GN=Hba-a3 PE=1 SV=2
G3V8R3	142	0	16049.2	2	16	0.000801105	0.0634	33.9109	Globin e1 OS=Rattus norvegicus OX=10116 GN=Hbz PE=3 SV=1
A0A0G2K9Z5	118	0	13006.5	2	11	0.000662779	0.2203	33.4829	Ig-like domain-containing protein OS=Rattus norvegicus OX=10116 PE=4 SV=1
D3ZZ00	1278	0	143334	1	13	7.2322e-05	0.0117	33.0642	ATP-binding cassette sub-family C member 9 OS=Rattus norvegicus OX=10116 GN=Abcc9 PE=4 SV=3
Q63563	1545	0	173989	1	13	5.98236e-05	0.0097	33.0642	ATP-binding cassette sub-family C member 9 OS=Rattus norvegicus OX=10116 GN=Abcc9 PE=1 SV=1; Additional IDs concatenated into MaxParsimony group: Q9JJ67, F1M9Q2, D3ZZ00; Additional IDs concatenated into MaxParsimony group: Q9JJ67, F1M9Q2, D3ZZ00
Q9JJ67	1545	0	174235	1	13	5.98236e-05	0.0097	33.0642	Sulphonylurea receptor 2b OS=Rattus norvegicus OX=10116 GN=SUR2b PE=2 SV=1
F1M9Q2	1545	0	174255	1	13	5.98236e-05	0.0097	33.0642	ATP-binding cassette sub-family C member 9 OS=Rattus norvegicus OX=10116 GN=Abcc9 PE=4 SV=3
Q78EF2	70	0	8091.2	2	10	0.00101569	0.4286	32.6694	Rat apolipoprotein B (apoB) (Fragment) OS=Rattus norvegicus OX=10116 PE=2 SV=1
Q6IFX0	446	0	48895.2	2	16	0.00025506	0.0202	32.2633	Keratin, type I cytoskeletal 25 OS=Rattus norvegicus OX=10116 GN=Krt25 PE=3 SV=1
Q6IFW8	449	0	49060.3	2	16	0.000253356	0.02	32.2633	Keratin, type I cytoskeletal 27 OS=Rattus norvegicus OX=10116 GN=Krt27 PE=3 SV=1
A0A221LEF7	474	0	51935.7	2	16	0.000239994	0.019	32.2633	Keratin 25 OS=Rattus norvegicus OX=10116 GN=krt25 PE=2 SV=1
O88752	147	0	16076.5	1	14	0.000677125	0.068	31.953	Epsilon 1 globin OS=Rattus norvegicus OX=10116 GN=Hbe1 PE=1 SV=1
F1M581	535	0	60820.8	4	14	0.000186051	0.0991	31.6982	Heparanase OS=Rattus norvegicus OX=10116 GN=Hpse PE=4 SV=3
D3Z7Y6	431	0	49050.9	1	11	0.000181457	0.0255	31.3024	Keratin, type I cytoskeletal 20 OS=Rattus norvegicus OX=10116 GN=Krt20 PE=1 SV=3
contaminant_KERATIN11	424	0	48438.9	1	11	0.000184453	0.0259	31.3024
A0A0G2K623	214	0	24898	1	11	0.000365458	0.0514	31.3024	Keratin, type I cytoskeletal 20 (Fragment) OS=Rattus norvegicus OX=10116 GN=Krt20 PE=1 SV=1
P25030	429	0	49339.3	1	11	0.000182303	0.0256	31.3024	Keratin, type I cytoskeletal 20 OS=Rattus norvegicus OX=10116 GN=Krt20 PE=1 SV=2
Q6LC76	190	0	20510.4	1	8	0.00029936	0.1	29.9732	Fibronectin (Fragment) OS=Rattus norvegicus OX=10116 GN=fn-1 PE=4 SV=1
F1M1R0	136	1	14866.2	3	11	0.000575058	0.2941	29.878	Ig-like domain-containing protein OS=Rattus norvegicus OX=10116 GN=LOC690813 PE=1 SV=2; Additional IDs concatenated into MaxParsimony group: F1M1Q7, F1M195, A0A0G2JWF2, A0A0G2JTG4, A0A0G2K7P6; Additional IDs concatenated into MaxParsimony group: F1M1Q7, F1M195, A0A0G2JWF2, A0A0G2JTG4, A0A0G2K7P6
A0A0G2K1W2	262	0	29733.6	1	13	0.000352777	0.0458	29.5046	BTG anti-proliferation factor 4 OS=Rattus norvegicus OX=10116 GN=Btg4 PE=4 SV=1; Additional IDs concatenated into MaxParsimony group: Q4VFT8, Q5M7A6; Additional IDs concatenated into MaxParsimony group: Q4VFT8, Q5M7A6
Q4VFT8	250	0	28495.1	1	13	0.00036971	0.048	29.5046	B-cell translocation gene 4 OS=Rattus norvegicus OX=10116 GN=Btg4 PE=2 SV=1
Q5M7A6	162	0	18147	1	13	0.00057054	0.0741	29.5046	B-cell translocation gene 4 OS=Rattus norvegicus OX=10116 GN=Btg4 PE=2 SV=1
Q5BJY9	423	0	47714.3	2	16	0.000268929	0.0331	28.9381	Keratin, type I cytoskeletal 18 OS=Rattus norvegicus OX=10116 GN=Krt18 PE=1 SV=3
Q9JMK6	59	0	6454.2	2	10	0.00120505	0.1864	28.0577	TED_complement domain-containing protein (Fragment) OS=Rattus norvegicus OX=10116 PE=2 SV=1
Q5FX35	507	0	56173.6	2	10	0.000140233	0.0217	28.0577	Alpha 2 macroglobulin cardiac isoform (Fragment) OS=Rattus norvegicus OX=10116 PE=2 SV=1
F8SQR6	117	0	13095.2	2	12	0.000729211	0.094	28.0285	Immunglobulin heavy chain variable region (Fragment) OS=Rattus norvegicus OX=10116 PE=2 SV=1
G3V6K1	427	0	47468.7	4	11	0.000183157	0.1054	27.024	Transcobalamin 2, isoform CRA_a OS=Rattus norvegicus OX=10116 GN=Tcn2 PE=4 SV=1
Q9R0D6	427	0	47371.6	4	11	0.000183157	0.1054	27.024	Transcobalamin-2 OS=Rattus norvegicus OX=10116 GN=Tcn2 PE=2 SV=1; Additional IDs concatenated into MaxParsimony group: G3V6K1; Additional IDs concatenated into MaxParsimony group: G3V6K1
G3V8D4	97	3	10670.3	3	9	0.000659673	0.5876	26.0085	Apolipoprotein C-II (Predicted) OS=Rattus norvegicus OX=10116 GN=Apoc2 PE=1 SV=1
Q6LEK4	48	1	5335.7	3	8	0.00118497	0.5208	25.8336	Rat K kininogen gene, 5'end (Fragment) OS=Rattus norvegicus OX=10116 PE=4 SV=1
D4A1S0	679	0	76011.8	3	12	0.000125652	0.0412	25.5619	Complement C1s subcomponent OS=Rattus norvegicus OX=10116 GN=C1s PE=1 SV=3
F1LR02	1311	1	134545	3	7	3.79624e-05	0.0458	25.2899	Collagen type XVIII alpha 1 chain OS=Rattus norvegicus OX=10116 GN=Col18a1 PE=1 SV=2; Additional IDs concatenated into MaxParsimony group: Q9QZD2, Q9WUW5; Additional IDs concatenated into MaxParsimony group: Q9QZD2, Q9WUW5
Q6IFX1	491	1	52329.2	2	13	0.000188243	0.0468	25.2757	Keratin, type I cytoskeletal 24 OS=Rattus norvegicus OX=10116 GN=Krt24 PE=3 SV=1
P49744	980	0	108127	2	15	0.000108824	0.0071	25.2519	Thrombospondin-4 OS=Rattus norvegicus OX=10116 GN=Thbs4 PE=1 SV=1
A0A0G2JXN9	109	0	12767.3	2	15	0.000978414	0.0642	25.2519	Cartilage oligomeric matrix protein (Fragment) OS=Rattus norvegicus OX=10116 GN=Comp PE=4 SV=2
A0A0G2JZH3	955	0	104048	2	15	0.000111672	0.0073	25.2519	Thrombospondin 3 OS=Rattus norvegicus OX=10116 GN=Thbs3 PE=4 SV=1
P35444	755	0	82592.7	2	15	0.000141255	0.0093	25.2519	Cartilage oligomeric matrix protein OS=Rattus norvegicus OX=10116 GN=Comp PE=1 SV=1
F1LMS5	959	0	105751	2	15	0.000111207	0.0073	25.2519	Thrombospondin-4 OS=Rattus norvegicus OX=10116 GN=Thbs4 PE=4 SV=1
M0RBU0	755	0	82482.6	2	15	0.000141255	0.0093	25.2519	Cartilage oligomeric matrix protein OS=Rattus norvegicus OX=10116 GN=Comp PE=4 SV=1
A0A0G2K7L8	961	0	105963	2	15	0.000110975	0.0073	25.2519	Thrombospondin-4 OS=Rattus norvegicus OX=10116 GN=Thbs4 PE=4 SV=1
contaminant_NRL_1INDL	211	1	22733.2	1	14	0.000471741	0.0379	25.1372	immunoglobulin fab' fragment (igg1-lambda) complex With...
Q9WUW3	604	0	67235.6	1	9	0.000105941	0.0166	24.7096	Complement factor I OS=Rattus norvegicus OX=10116 GN=Cfi PE=2 SV=1
G3V934	258	0	28544.4	1	9	0.000248017	0.0388	24.7096	Kallikrein 9 (Predicted) OS=Rattus norvegicus OX=10116 GN=Klk9 PE=3 SV=1
F1M7H8	248	0	27208.1	1	9	0.000258017	0.0403	24.7096	Granzyme B-like 2 OS=Rattus norvegicus OX=10116 GN=Gzmbl2 PE=3 SV=3
Q63224	248	0	26988.1	1	9	0.000258017	0.0403	24.7096	Granzyme-like protein III OS=Rattus norvegicus OX=10116 GN=Gzmbl3 PE=2 SV=1
M0R4W8	248	0	27322.2	1	9	0.000258017	0.0403	24.7096	Granszyme B-like 1 OS=Rattus norvegicus OX=10116 GN=Gzmbl1 PE=3 SV=1
P50343	274	0	30470.5	1	9	0.000233534	0.0365	24.7096	Tryptase beta-2 OS=Rattus norvegicus OX=10116 GN=Tpsb2 PE=2 SV=1
Q6P6W8	273	0	30314.2	1	9	0.000234389	0.0366	24.7096	Tryptase alpha/beta 1 OS=Rattus norvegicus OX=10116 GN=Tpsab1 PE=2 SV=1
G3V8F2	274	0	30471.4	1	9	0.000233534	0.0365	24.7096	Mast cell protease 6, isoform CRA_a OS=Rattus norvegicus OX=10116 GN=Tpsb2 PE=3 SV=1
A0A0G2K135	626	0	69710.8	1	9	0.000102218	0.016	24.7096	Complement factor I OS=Rattus norvegicus OX=10116 GN=Cfi PE=1 SV=1
G3V8E5	310	0	34204.1	1	9	0.000206414	0.0323	24.7096	Tryptase OS=Rattus norvegicus OX=10116 GN=Tpsab1 PE=1 SV=1
F1LSX0	231	0	25277.3	1	9	0.000277006	0.0433	24.7096	Peptidase S1 domain-containing protein OS=Rattus norvegicus OX=10116 PE=3 SV=2
D3ZF49	772	0	86293	1	9	8.28864e-05	0.013	24.7096	Transmembrane serine protease 6 OS=Rattus norvegicus OX=10116 GN=Tmprss6 PE=1 SV=1
P27435	273	0	30362.3	1	9	0.000234389	0.0366	24.7096	Tryptase OS=Rattus norvegicus OX=10116 GN=Tpsab1 PE=1 SV=2
A0A0A0MY24	248	0	27002.1	1	9	0.000258017	0.0403	24.7096	Granzyme B-like 3 OS=Rattus norvegicus OX=10116 GN=Gzmbl3 PE=3 SV=2
P18291	248	0	27290.3	1	9	0.000258017	0.0403	24.7096	Granzyme B OS=Rattus norvegicus OX=10116 GN=Gzmb PE=1 SV=1
Q06605	248	0	27200.1	1	9	0.000258017	0.0403	24.7096	Granzyme-like protein 1 OS=Rattus norvegicus OX=10116 PE=2 SV=1
F1LQT4	565	0	62582.2	3	10	0.000125837	0.0513	24.5476	Carboxypeptidase N subunit 2 OS=Rattus norvegicus OX=10116 GN=Cpn2 PE=1 SV=1; Additional IDs concatenated into MaxParsimony group: B1H247; Additional IDs concatenated into MaxParsimony group: B1H247
B1H247	543	0	60274	3	10	0.000130936	0.0534	24.5476	Uncharacterized protein (Fragment) OS=Rattus norvegicus OX=10116 PE=2 SV=1
M0R7M5	132	1	14621.5	2	8	0.000430898	0.2197	24.4776	Ig-like domain-containing protein OS=Rattus norvegicus OX=10116 PE=1 SV=2; Additional IDs concatenated into MaxParsimony group: D3ZIL8, M0RDL2, M0RC23, F1M7B3, M0RDZ5, A0A0G2JWX0, D4A3L8, F1M6G9, A0A0G2K9W1, M0RD98, M0RAV0
F1LWW1	113	2	12339.1	2	9	0.000566268	0.1327	24.1803	Ig-like domain-containing protein OS=Rattus norvegicus OX=10116 PE=1 SV=3
G3V6G1	159	2	17754.7	2	12	0.000536589	0.1447	24.1484	Immunoglobulin joining chain OS=Rattus norvegicus OX=10116 GN=Jchain PE=1 SV=1
Q5M878	130	0	14945.4	2	12	0.00065629	0.1462	24.1321	Serum amyloid A protein OS=Rattus norvegicus OX=10116 GN=Saa4 PE=1 SV=1
Q7TMC3	830	0	92763.7	2	12	0.000102792	0.0229	24.1321	Hermansky-Pudlak syndrome 5 protein homolog OS=Rattus norvegicus OX=10116 GN=Saa4 PE=1 SV=1; Additional IDs concatenated into MaxParsimony group: Q5M878; Additional IDs concatenated into MaxParsimony group: Q5M878
F1M7F7	931	0	104237	4	9	6.87307e-05	0.0655	24.1317	Complement component C6 OS=Rattus norvegicus OX=10116 GN=C6 PE=1 SV=3
Q811M5	934	0	105027	4	9	6.85099e-05	0.0653	24.1317	Complement component C6 OS=Rattus norvegicus OX=10116 GN=C6 PE=2 SV=1; Additional IDs concatenated into MaxParsimony group: F1M7F7; Additional IDs concatenated into MaxParsimony group: F1M7F7
F1LUV3	326	0	35113.9	2	8	0.000174474	0.089	23.8701	Gp_dh_N domain-containing protein OS=Rattus norvegicus OX=10116 PE=1 SV=3
E9PTV9	333	0	35816	2	8	0.000170806	0.0841	23.8525	Glyceraldehyde-3-phosphate dehydrogenase OS=Rattus norvegicus OX=10116 PE=1 SV=2
Q9WUW5	171	0	18903.5	2	6	0.000249467	0.2924	23.6111	Collagen type XVIII, alpha (I) chain (Fragment) OS=Rattus norvegicus OX=10116 GN=col18a1 PE=2 SV=1
Q9QZD2	226	0	25316.5	2	6	0.000188756	0.2212	23.6111	Collagen XVIII (Fragment) OS=Rattus norvegicus OX=10116 PE=2 SV=1
G3V8Z5	129	0	14255.8	3	9	0.000496033	0.2868	23.3742	Ig-like domain-containing protein OS=Rattus norvegicus OX=10116 PE=1 SV=2; Additional IDs concatenated into MaxParsimony group: A0N4E8, M0R936, E9PSU8, D3ZE07, B2RYW6, A2NB82; Additional IDs concatenated into MaxParsimony group: A0N4E8, M0R936, E9PSU8, D3ZE07, B2RYW6, A2NB82
A0N4E8	126	0	13909.7	3	9	0.000507844	0.2937	23.3742	Productively rearranged V-lambda-2 (Fragment) OS=Rattus norvegicus OX=10116 PE=2 SV=1
M0R547	88	0	9672.3	2	14	0.00113111	0.1818	23.1409	Apolipoprotein C-I-like OS=Rattus norvegicus OX=10116 GN=LOC100910181 PE=4 SV=1
D3ZAB3	119	2	13237.2	2	8	0.00047797	0.1345	23.096	Ig-like domain-containing protein OS=Rattus norvegicus OX=10116 PE=1 SV=3
Q6IFV7	455	0	51493.8	1	12	0.000187511	0.0154	22.7244	Keratin 32 OS=Rattus norvegicus OX=10116 GN=Krt32 PE=2 SV=1
F1MAS0	455	0	51479.7	1	12	0.000187511	0.0154	22.7244	Keratin 32 OS=Rattus norvegicus OX=10116 GN=Krt32 PE=3 SV=2
Q6IFW7	383	0	41281.6	1	12	0.000222762	0.0183	22.7244	Keratin 28 OS=Rattus norvegicus OX=10116 GN=Krt28 PE=2 SV=1
Q6IFW0	404	0	45788.2	1	12	0.000211182	0.0173	22.7244	RCG32608 OS=Rattus norvegicus OX=10116 GN=Krt33b PE=2 SV=1
Q6IFW2	431	0	48246.6	1	12	0.000197953	0.0162	22.7244	Keratin, type I cytoskeletal 40 OS=Rattus norvegicus OX=10116 GN=Krt40 PE=3 SV=1
contaminant_KERATIN09	429	0	47879.5	1	12	0.000198876	0.0163	22.7244
Q6IFV6	455	0	50624.6	1	12	0.000187511	0.0154	22.7244	Keratin 35 OS=Rattus norvegicus OX=10116 GN=Krt35 PE=2 SV=1
F1MAF7	414	0	46789.7	1	12	0.000206081	0.0169	22.7244	Keratin 31 OS=Rattus norvegicus OX=10116 GN=Krt31 PE=3 SV=2
Q6IFV5	468	0	52202.8	1	12	0.000182303	0.015	22.7244	Keratin 36 OS=Rattus norvegicus OX=10116 GN=Krt36 PE=2 SV=1
Q6IFV8	414	0	46693.6	1	12	0.000206081	0.0169	22.7244	Type I hair keratin KA25 OS=Rattus norvegicus OX=10116 GN=Krt31 PE=2 SV=1
A0A096MJE0	416	0	47381.9	1	12	0.000205091	0.0168	22.7244	Keratin 32 (Fragment) OS=Rattus norvegicus OX=10116 GN=Krt32 PE=3 SV=1
A0A0G2JWF2	95	0	10277	2	9	0.000673561	0.2316	22.4424	Ig-like domain-containing protein OS=Rattus norvegicus OX=10116 PE=4 SV=1
F1M1Q7	134	0	14550.2	2	9	0.000477525	0.1642	22.4424	Ig-like domain-containing protein OS=Rattus norvegicus OX=10116 PE=4 SV=3
F1M195	96	0	10441.2	2	9	0.000666545	0.2292	22.4424	Ig-like domain-containing protein OS=Rattus norvegicus OX=10116 PE=4 SV=3
A0A0G2JTG4	94	0	10227.2	2	9	0.000680727	0.234	22.4424	Ig-like domain-containing protein OS=Rattus norvegicus OX=10116 PE=4 SV=1
H6X320	228	0	26141.1	3	8	0.000249467	0.1579	22.2465	Pentaxin OS=Rattus norvegicus OX=10116 GN=Apcs PE=3 SV=1
H6X338	228	0	26169.1	3	8	0.000249467	0.1579	22.2465	Pentaxin OS=Rattus norvegicus OX=10116 GN=sap PE=3 SV=1
A0A0H2UHH2	275	0	31581	3	8	0.000206831	0.1309	22.2465	Serum amyloid P-component OS=Rattus norvegicus OX=10116 GN=Apcs PE=1 SV=1; Additional IDs concatenated into MaxParsimony group: H6X321, H6X338, H6X324, H6X319, H6X331, P23680, H6X320, H6X332; Additional IDs concatenated into MaxParsimony group: P23680, H6X331, H6X319, H6X321, H6X338, H6X320, H6X324, H6X332
H6X332	228	0	26050	3	8	0.000249467	0.1579	22.2465	Pentaxin OS=Rattus norvegicus OX=10116 GN=sap PE=3 SV=1
H6X321	228	0	26042	3	8	0.000249467	0.1579	22.2465	Pentaxin OS=Rattus norvegicus OX=10116 GN=sap PE=3 SV=1
H6X319	228	0	26069.1	3	8	0.000249467	0.1579	22.2465	Pentaxin OS=Rattus norvegicus OX=10116 GN=sap PE=3 SV=1
H6X331	228	0	26126	3	8	0.000249467	0.1579	22.2465	Pentaxin OS=Rattus norvegicus OX=10116 GN=sap PE=3 SV=1
P23680	228	0	26141.1	3	8	0.000249467	0.1579	22.2465	Serum amyloid P-component OS=Rattus norvegicus OX=10116 GN=Apcs PE=2 SV=2
H6X324	228	0	26099	3	8	0.000249467	0.1579	22.2465	Pentaxin OS=Rattus norvegicus OX=10116 GN=sap PE=3 SV=1
M0RAZ1	102	0	11081.5	2	8	0.000557632	0.2353	22.1013	Ig-like domain-containing protein OS=Rattus norvegicus OX=10116 PE=4 SV=2
A0A0G2K5D2	126	0	13525.9	2	8	0.000451417	0.1905	22.1013	Ig-like domain-containing protein OS=Rattus norvegicus OX=10116 PE=1 SV=1; Additional IDs concatenated into MaxParsimony group: M0RAZ1, D3ZBB2, D4ADL1, A0A0G2K9L1; Additional IDs concatenated into MaxParsimony group: M0RAZ1, D4ADL1, D3ZBB2, A0A0G2K9L1
M0RC23	102	0	11169.5	2	8	0.000557632	0.1961	21.7573	Ig-like domain-containing protein OS=Rattus norvegicus OX=10116 PE=1 SV=1
A0A0G2K3S3	132	0	14797.5	2	8	0.000430898	0.1515	21.7573	Ig-like domain-containing protein OS=Rattus norvegicus OX=10116 PE=4 SV=1; Additional IDs concatenated into MaxParsimony group: D3ZIL8, F1M7B3, M0RC23, M0RDL2, M0RDZ5, A0A0G2JWX0, A0A0G2K9W1, F1M6G9, D4A3L8, M0RD98, M0RAV0
D3ZIL8	115	0	12628.2	2	8	0.000494596	0.1739	21.7573	Ig-like domain-containing protein OS=Rattus norvegicus OX=10116 PE=4 SV=2
F1M7B3	102	0	11171.7	2	8	0.000557632	0.1961	21.7573	Ig-like domain-containing protein OS=Rattus norvegicus OX=10116 PE=4 SV=2
M0RDZ5	95	0	10414.2	2	8	0.000598721	0.2105	21.7573	Ig-like domain-containing protein OS=Rattus norvegicus OX=10116 PE=4 SV=1
M0RDL2	102	0	11241.6	2	8	0.000557632	0.1961	21.7573	Ig-like domain-containing protein OS=Rattus norvegicus OX=10116 PE=4 SV=2
O70197	47	0	4914.2	1	7	0.00105891	0.2979	21.642	HGF activator (Fragment) OS=Rattus norvegicus OX=10116 PE=2 SV=1
D3ZWV2	325	0	34971.8	2	7	0.000153134	0.0708	21.4479	Glyceraldehyde-3-phosphate dehydrogenase OS=Rattus norvegicus OX=10116 PE=3 SV=3
P15999	553	0	59698.6	1	8	0.000102854	0.0235	21.2922	ATP synthase subunit alpha, mitochondrial OS=Rattus norvegicus OX=10116 GN=Atp5f1a PE=1 SV=2
F1LP05	553	0	59757.7	1	8	0.000102854	0.0235	21.2922	ATP synthase subunit alpha OS=Rattus norvegicus OX=10116 GN=Atp5f1a PE=1 SV=1; Additional IDs concatenated into MaxParsimony group: P15999; Additional IDs concatenated into MaxParsimony group: P15999
A0A0G2JXB7	116	1	12863.4	4	12	0.000735498	0.2155	21.0611	Ig-like domain-containing protein OS=Rattus norvegicus OX=10116 PE=1 SV=1
G3V6P7	1960	0	226254	6	9	3.26471e-05	0.0337	21.0438	Myosin heavy chain 9-like 1 OS=Rattus norvegicus OX=10116 GN=Myh9 PE=1 SV=1; Additional IDs concatenated into MaxParsimony group: Q62812, G3V9Y1, Q9JLT0, Q62704; Additional IDs concatenated into MaxParsimony group: Q62812, G3V9Y1, Q9JLT0, Q62704
A0A0G2K7P6	94	0	10205	1	8	0.00060509	0.1596	20.8185	IGv domain-containing protein OS=Rattus norvegicus OX=10116 PE=4 SV=1
Q5FVP9	393	0	45258.5	3	10	0.000180911	0.0662	20.4757	Cfh protein OS=Rattus norvegicus OX=10116 GN=LOC100361907 PE=2 SV=1
F1LUI2	198	0	21434.9	1	6	0.000215449	0.0758	19.728	Gp_dh_C domain-containing protein OS=Rattus norvegicus OX=10116 PE=4 SV=3
D3ZME3	310	0	33387.9	1	6	0.000137609	0.0484	19.728	Gp_dh_N domain-containing protein OS=Rattus norvegicus OX=10116 PE=1 SV=1
A0A0G2JYY8	335	0	35814.8	1	6	0.00012734	0.0448	19.728	Gp_dh_N domain-containing protein OS=Rattus norvegicus OX=10116 PE=1 SV=1
Q498M9	335	0	36114.1	1	6	0.00012734	0.0418	19.7104	Similar to glyceraldehyde-3-phosphate dehydrogenase OS=Rattus norvegicus OX=10116 GN=LOC303448 PE=1 SV=1
F1M2N4	280	0	30373.2	1	6	0.000152353	0.05	19.7104	Gp_dh_N domain-containing protein OS=Rattus norvegicus OX=10116 PE=1 SV=2
D3ZEN2	142	0	15345.7	1	6	0.000300415	0.0986	19.7104	Gp_dh_C domain-containing protein OS=Rattus norvegicus OX=10116 PE=4 SV=2
D4ADL1	120	0	12888.4	1	7	0.000414739	0.1083	19.651	Ig-like domain-containing protein OS=Rattus norvegicus OX=10116 PE=4 SV=3
A0A0G2K9L1	115	0	12436.4	1	7	0.000432771	0.113	19.651	Uncharacterized protein OS=Rattus norvegicus OX=10116 PE=4 SV=1
D3ZBB2	120	0	13118.6	1	7	0.000414739	0.1083	19.651	Ig-like domain-containing protein OS=Rattus norvegicus OX=10116 PE=1 SV=3
Q63050	75	0	8763.4	3	8	0.00075838	0.4133	19.5703	Rat apolipoprotein B PI (Fragment) OS=Rattus norvegicus OX=10116 PE=2 SV=1
Q4G047	437	0	50940.1	4	8	0.000130157	0.103	19.072	Apob protein (Fragment) OS=Rattus norvegicus OX=10116 GN=Apob PE=2 SV=1
M0RAV0	93	0	10104.9	1	6	0.000458697	0.1398	18.8819	Ig-like domain-containing protein OS=Rattus norvegicus OX=10116 PE=4 SV=1
M0RD98	122	0	13096.7	1	6	0.000349663	0.1066	18.8819	Ig-like domain-containing protein OS=Rattus norvegicus OX=10116 PE=4 SV=2
Q62812	1961	0	226179	5	8	2.90048e-05	0.028	18.5131	Myosin-9 OS=Rattus norvegicus OX=10116 GN=Myh9 PE=1 SV=3
Q6IFW5	456	0	48772	1	8	0.000124734	0.0197	17.9992	Keratin, type I cytoskeletal 12 OS=Rattus norvegicus OX=10116 GN=Krt12 PE=3 SV=1
A0A0G2K4H9	483	0	52009.5	1	8	0.000117761	0.0186	17.9992	Keratin, type I cytoskeletal 12 OS=Rattus norvegicus OX=10116 GN=Krt12 PE=3 SV=1
F1LWD0	106	2	11894.9	2	6	0.000402442	0.2358	17.7702	Ig-like domain-containing protein OS=Rattus norvegicus OX=10116 PE=1 SV=2
Q6PDV1	148	0	16701.3	1	5	0.000240196	0.0811	16.5642	Lysozyme OS=Rattus norvegicus OX=10116 GN=Lyz2 PE=2 SV=1
B2RYD4	155	0	17064.1	1	5	0.000229349	0.0774	16.5642	Lysozyme OS=Rattus norvegicus OX=10116 GN=Lyc2 PE=2 SV=1; Additional IDs concatenated into MaxParsimony group: A0A0G2K5X1, P00697, F1M8E9, Q05820, Q6PDV1; Additional IDs concatenated into MaxParsimony group: A0A0G2K5X1, Q6PDV1, Q05820, P00697, F1M8E9
Q05820	148	0	16589.2	1	5	0.000240196	0.0811	16.5642	Putative lysozyme C-2 OS=Rattus norvegicus OX=10116 GN=Lyz2 PE=5 SV=1
A0A0G2K5X1	150	0	16789.3	1	5	0.000236994	0.08	16.5642	Lysozyme OS=Rattus norvegicus OX=10116 GN=Lyc2 PE=3 SV=1
P00697	148	0	16700.3	1	5	0.000240196	0.0811	16.5642	Lysozyme C-1 OS=Rattus norvegicus OX=10116 GN=Lyz1 PE=1 SV=2
F1M8E9	148	0	16689.2	1	5	0.000240196	0.0811	16.5642	Lysozyme OS=Rattus norvegicus OX=10116 GN=Lyz2 PE=1 SV=1
D3ZMS7	115	1	12695.3	1	6	0.000370947	0.0957	16.3488	Ig-like domain-containing protein OS=Rattus norvegicus OX=10116 PE=1 SV=3
F1LPR6	470	0	51349.3	3	10	0.000151273	0.0277	16.2421	Immunoglobulin heavy constant mu OS=Rattus norvegicus OX=10116 GN=Ighm PE=1 SV=3
P31211	396	2	44624.3	3	9	0.000161587	0.0859	15.264	Corticosteroid-binding globulin OS=Rattus norvegicus OX=10116 GN=Serpina6 PE=1 SV=2
M0R4Z4	118	1	13259.4	2	7	0.000421768	0.0932	14.7897	Ig-like domain-containing protein OS=Rattus norvegicus OX=10116 PE=1 SV=2
M0RDF0	108	0	12084.9	2	9	0.000592484	0.0648	14.6364	Ig-like domain-containing protein OS=Rattus norvegicus OX=10116 PE=1 SV=1
A0A0G2JXP0	116	0	12867.5	2	9	0.000551623	0.0603	14.6364	Ig-like domain-containing protein OS=Rattus norvegicus OX=10116 PE=1 SV=1
F1M3H2	99	0	11163.3	1	6	0.000430898	0.0909	14.4674	Ig-like domain-containing protein OS=Rattus norvegicus OX=10116 PE=4 SV=2
D3ZFF8	117	1	12958.4	2	8	0.000486141	0.2308	14.3595	Ig-like domain-containing protein OS=Rattus norvegicus OX=10116 PE=1 SV=2; Additional IDs concatenated into MaxParsimony group: M0RBX3; Additional IDs concatenated into MaxParsimony group: M0RBX3
A0A0G2JZL1	133	2	14922.5	2	6	0.000320743	0.0677	14.3336	Ig-like domain-containing protein OS=Rattus norvegicus OX=10116 PE=4 SV=1
A0A0G2K7N1	553	0	60379.6	1	6	7.71408e-05	0.0163	13.8124	Keratin, type II cytoskeletal 72 OS=Rattus norvegicus OX=10116 GN=Krt72 PE=3 SV=1
Q6IG04	520	0	56797.9	1	6	8.20363e-05	0.0173	13.8124	Keratin, type II cytoskeletal 72 OS=Rattus norvegicus OX=10116 GN=Krt72 PE=3 SV=2
A0A1B0GWQ4	291	0	33440	3	6	0.000146594	0.1271	13.6503	Complement C5 (Fragment) OS=Rattus norvegicus OX=10116 GN=C5 PE=1 SV=1
Q5D1M8	356	0	39226.7	2	6	0.000119828	0.0534	13.6178	Alpha 2 macroglobulin cardiac isoform (Fragment) OS=Rattus norvegicus OX=10116 PE=2 SV=1
A0A0G2K8Q1	100	1	11004.5	1	3	0.000213294	0.19	12.9358	Apolipoprotein C-III OS=Rattus norvegicus OX=10116 GN=Apoc3 PE=1 SV=1
Q63030	35	0	3521.6	1	6	0.00121882	0.2857	12.7548	Rat alpha-smooth muscle actin mRNA (Fragment) OS=Rattus norvegicus OX=10116 PE=2 SV=1
Q699Y1	482	0	50620.6	2	5	7.37532e-05	0.0249	12.364	60 kDa chaperonin (Fragment) OS=Bartonella rattimassiliensis OX=270250 PE=3 SV=1
Q699Y0	486	0	50980.7	2	5	7.31462e-05	0.0247	12.364	60 kDa chaperonin (Fragment) OS=Bartonella rattimassiliensis OX=270250 PE=3 SV=1; Additional IDs concatenated into MaxParsimony group: Q699Y1; Additional IDs concatenated into MaxParsimony group: Q699Y1
F1MAA9	326	0	37368.2	1	6	0.000130855	0.0307	12.3321	Serpin family B member 3 OS=Rattus norvegicus OX=10116 GN=Serpinb3 PE=3 SV=2
D3ZPF9	421	0	47482.5	1	6	0.000101327	0.0238	12.3321	Serpin family B member 12 OS=Rattus norvegicus OX=10116 GN=Serpinb12 PE=3 SV=1
D3ZJK2	387	0	44387.1	1	6	0.00011023	0.0258	12.3321	Serine (or cysteine) peptidase inhibitor, clade B (ovalbumin), member 3A OS=Rattus norvegicus OX=10116 GN=Serpinb3a PE=3 SV=1
Q6IE44	326	0	37324.1	1	6	0.000130855	0.0307	12.3321	Serine protease inhibitor B3 OS=Rattus norvegicus OX=10116 GN=Serpinb3 PE=2 SV=1
contaminant_NRL_1MCOH	428	3	46804.8	3	5	8.30585e-05	0.0935	12.163	Immunoglobulin g1 (igg1) (mcg) with a hinge deletion, chain H...
F1LZY6	97	0	10458.1	1	4	0.000293188	0.134	12.1477	Ig-like domain-containing protein OS=Rattus norvegicus OX=10116 PE=1 SV=2
M0R816	97	0	10614	1	4	0.000293188	0.134	12.1477	Ig-like domain-containing protein OS=Rattus norvegicus OX=10116 PE=1 SV=2
F1M8K5	258	0	28342.5	1	5	0.000137787	0.0388	12.09	Granzyme K OS=Rattus norvegicus OX=10116 GN=Gzmk PE=3 SV=2
P49864	258	0	28428.6	1	5	0.000137787	0.0388	12.09	Granzyme K OS=Rattus norvegicus OX=10116 GN=Gzmk PE=1 SV=1; Additional IDs concatenated into MaxParsimony group: F1M8K5; Additional IDs concatenated into MaxParsimony group: F1M8K5
M0RBX3	117	0	13019.4	1	7	0.000425373	0.0598	12.0811	Ig-like domain-containing protein OS=Rattus norvegicus OX=10116 PE=4 SV=2
M0R9U2	98	1	10820.4	2	6	0.000435295	0.2347	12.0335	Ig-like domain-containing protein OS=Rattus norvegicus OX=10116 PE=1 SV=1
E9PSU8	137	0	15134.2	1	5	0.000259482	0.0803	11.9176	Ig-like domain-containing protein OS=Rattus norvegicus OX=10116 PE=1 SV=3
A2NB82	111	0	12168.8	1	5	0.000320262	0.0991	11.9176	Productively rearranged V-lambda-2 (Fragment) OS=Rattus norvegicus OX=10116 PE=2 SV=1
B2RYW6	129	0	14381.9	1	5	0.000275574	0.0853	11.9176	Ig-like domain-containing protein OS=Rattus norvegicus OX=10116 PE=2 SV=1
M0R936	140	0	15409.2	1	5	0.000253922	0.0786	11.9176	Ig-like domain-containing protein OS=Rattus norvegicus OX=10116 PE=4 SV=2
D3ZE07	131	0	14588	1	5	0.000271367	0.084	11.9176	Ig-like domain-containing protein OS=Rattus norvegicus OX=10116 PE=4 SV=3
Q9JLT0	1976	0	228806	3	5	1.79904e-05	0.0177	11.1432	Myosin-10 OS=Rattus norvegicus OX=10116 GN=Myh10 PE=1 SV=1
G3V9Y1	1976	0	228839	3	5	1.79904e-05	0.0177	11.1432	Myosin, heavy polypeptide 10, non-muscle, isoform CRA_b OS=Rattus norvegicus OX=10116 GN=Myh10 PE=1 SV=1
F1LW26	120	1	12899.4	1	4	0.000236994	0.0917	10.7917	Ig-like domain-containing protein OS=Rattus norvegicus OX=10116 PE=4 SV=3
A0A0G2K4K2	96	0	10382.9	2	6	0.000444363	0.1667	10.7483	Ig-like domain-containing protein OS=Rattus norvegicus OX=10116 PE=1 SV=1; Additional IDs concatenated into MaxParsimony group: F1LVL4, M0RBP7, A0A0G2JT70; Additional IDs concatenated into MaxParsimony group: F1LVL4, M0RBP7, A0A0G2JT70
Reverse_F1M443	752	1	83877.4	1	5	4.72727e-05	0.0412	10.5634
Q498D4	1552	0	161859	2	5	2.29053e-05	0.0129	10.5596	Tln1 protein OS=Rattus norvegicus OX=10116 GN=Tln1 PE=2 SV=1
D0VYQ0	270	0	29597.5	1	5	0.000131663	0.0296	9.9881	DLST protein OS=Rattus norvegicus OX=10116 GN=DLST PE=2 SV=1
G3V6P2	454	0	48850.3	1	5	7.83019e-05	0.0176	9.9881	Dihydrolipoamide S-succinyltransferase (E2 component of 2-oxo-glutarate complex), isoform CRA_a OS=Rattus norvegicus OX=10116 GN=Dlst PE=1 SV=1; Additional IDs concatenated into MaxParsimony group: Q8CJG5, Q01205, D0VYQ0
Q8CJG5	454	0	48564.2	1	5	7.83019e-05	0.0176	9.9881	Gene OS=Rattus norvegicus OX=10116 PE=4 SV=1
Q01205	454	0	48876.3	1	5	7.83019e-05	0.0176	9.9881	Dihydrolipoyllysine-residue succinyltransferase component of 2-oxoglutarate dehydrogenase complex, mitochondrial OS=Rattus norvegicus OX=10116 GN=Dlst PE=1 SV=2; Additional IDs concatenated into MaxParsimony group: G3V6P2, Q8CJG5, D0VYQ0
P15473	292	0	31641.4	1	4	9.73947e-05	0.0411	9.6152	Insulin-like growth factor-binding protein 3 OS=Rattus norvegicus OX=10116 GN=Igfbp3 PE=1 SV=2; Additional IDs concatenated into MaxParsimony group: A1A5Q9; Additional IDs concatenated into MaxParsimony group: A1A5Q9
A1A5Q9	153	0	15548.8	1	4	0.000185877	0.0784	9.6152	Igfbp3 protein OS=Rattus norvegicus OX=10116 GN=Igfbp3 PE=2 SV=1
D3ZC56	7512	1	846665	1	4	3.78584e-06	0.0021	9.5228	Dystonin OS=Rattus norvegicus OX=10116 GN=Dst PE=1 SV=3
A0A0H2UHM7	448	0	49756.4	1	4	6.34804e-05	0.0312	9.4274	Tubulin alpha chain OS=Rattus norvegicus OX=10116 GN=LOC100909441 PE=3 SV=1
Q5XIF6	448	0	49874.4	1	4	6.34804e-05	0.0312	9.4274	Tubulin alpha-4A chain OS=Rattus norvegicus OX=10116 GN=Tuba4a PE=1 SV=1
Q6AYZ1	449	0	49887.5	1	4	6.33391e-05	0.0312	9.4274	Tubulin alpha-1C chain OS=Rattus norvegicus OX=10116 GN=Tuba1c PE=1 SV=1
Q6P9V9	451	0	50101.6	1	4	6.30582e-05	0.031	9.4274	Tubulin alpha-1B chain OS=Rattus norvegicus OX=10116 GN=Tuba1b PE=1 SV=1; Additional IDs concatenated into MaxParsimony group: Q6AYZ1, Q6AY56, A0A0H2UHM7, Q5XIF6; Additional IDs concatenated into MaxParsimony group: Q6AYZ1, Q6AY56, A0A0H2UHM7, Q5XIF6
Q6AY56	449	0	49987.5	1	4	6.33391e-05	0.0312	9.4274	Tubulin alpha-8 chain OS=Rattus norvegicus OX=10116 GN=Tuba8 PE=2 SV=1
G3V7K3	1059	0	120571	1	3	2.01411e-05	0.0151	9.3168	Ceruloplasmin OS=Rattus norvegicus OX=10116 GN=Cp PE=1 SV=1
A0A0G2K9I6	1084	0	123576	1	3	1.96766e-05	0.0148	9.3168	Ceruloplasmin OS=Rattus norvegicus OX=10116 GN=Cp PE=1 SV=1; Additional IDs concatenated into MaxParsimony group: Q9JL97, G3V7K3; Additional IDs concatenated into MaxParsimony group: Q9JL97, G3V7K3
Q9JL97	1084	0	123652	1	3	1.96766e-05	0.0148	9.3168	GPI-anchored ceruloplasmin OS=Rattus norvegicus OX=10116 PE=2 SV=1
F1M927	154	0	17843.4	2	6	0.000277006	0.1169	9.3106	Ubiquitin-like domain-containing protein OS=Rattus norvegicus OX=10116 PE=4 SV=2
O88772	68	1	7622.9	2	4	0.000418224	0.3971	9.1616	Protease nexin PN-1 (Fragment) OS=Rattus norvegicus OX=10116 PE=2 SV=1
Q6LE95	56	0	5992	1	5	0.000634804	0.1429	9.156	Kininogen OS=Rattus norvegicus OX=10116 PE=4 SV=1
Q8K3U6	446	2	50348.7	2	5	7.97064e-05	0.0471	8.9978	Coagulation factor VII OS=Rattus norvegicus OX=10116 GN=F7 PE=2 SV=1
Q4KM33	350	0	39952.5	1	3	6.09412e-05	0.0686	8.9413	Pleckstrin OS=Rattus norvegicus OX=10116 GN=Plek PE=1 SV=1; Additional IDs concatenated into MaxParsimony group: A0A0G2K393; Additional IDs concatenated into MaxParsimony group: A0A0G2K393
A0A0G2K393	327	0	37208	1	3	6.52276e-05	0.0734	8.9413	Pleckstrin OS=Rattus norvegicus OX=10116 GN=Plek PE=1 SV=1
Q64599	216	0	24057.5	1	5	0.000164579	0.0324	8.5383	Hemiferrin OS=Rattus norvegicus OX=10116 GN=LOC286987 PE=2 SV=1
Reverse_D4A7J3	2269	0	255308	1	5	1.56673e-05	0.0035	8.4915	; Additional IDs concatenated into MaxParsimony group: Reverse_D3ZPI6; Additional IDs concatenated into MaxParsimony group: Reverse_D3ZPI6
Reverse_D3ZPI6	838	0	95306	1	5	4.24213e-05	0.0095	8.4915
A0A0G2K535	2111	0	232997	1	5	1.68399e-05	0.0028	8.3075	Bromodomain adjacent to zinc finger domain, 2B OS=Rattus norvegicus OX=10116 GN=Baz2b PE=1 SV=1
A0A0G2K175	2129	0	235232	1	5	1.66975e-05	0.0028	8.3075	Bromodomain adjacent to zinc finger domain, 2B OS=Rattus norvegicus OX=10116 GN=Baz2b PE=1 SV=1
P14423	146	0	16264.8	2	3	0.000146092	0.137	7.8898	Phospholipase A2, membrane associated OS=Rattus norvegicus OX=10116 GN=Pla2g2a PE=1 SV=2; Additional IDs concatenated into MaxParsimony group: Q6DQ97, B6VNU1, B6VNU2; Additional IDs concatenated into MaxParsimony group: Q6DQ97, B6VNU1, B6VNU2
Q6DQ97	146	0	16280.9	2	3	0.000146092	0.137	7.8898	Phospholipase A(2) (Fragment) OS=Rattus norvegicus OX=10116 PE=2 SV=1
M0R8B5	120	0	12906.3	1	2	0.000118497	0.1417	7.8166	Ig-like domain-containing protein OS=Rattus norvegicus OX=10116 PE=1 SV=2; Additional IDs concatenated into MaxParsimony group: M0RCN6; Additional IDs concatenated into MaxParsimony group: M0RCN6
M0RCN6	114	0	12412.1	1	2	0.000124734	0.1491	7.8166	Similar to immunoglobulin kappa-chain VK-1 OS=Rattus norvegicus OX=10116 GN=RGD1563231 PE=1 SV=1
D3ZEP2	131	1	14672	1	4	0.000217093	0.1069	7.5761	Norrie disease homolog (Human) (Predicted), isoform CRA_a OS=Rattus norvegicus OX=10116 GN=LOC100909913 PE=4 SV=1
D4A4L6	117	0	12942.4	1	3	0.000182303	0.1282	7.5415	Ig-like domain-containing protein OS=Rattus norvegicus OX=10116 PE=1 SV=1; Additional IDs concatenated into MaxParsimony group: D3ZQM9; Additional IDs concatenated into MaxParsimony group: D3ZQM9
D3ZQM9	116	0	12914.4	1	3	0.000183874	0.1293	7.5415	Ig-like domain-containing protein OS=Rattus norvegicus OX=10116 PE=1 SV=2
M0RBP7	118	0	12758.1	1	4	0.000241011	0.0678	7.3526	Ig-like domain-containing protein OS=Rattus norvegicus OX=10116 PE=4 SV=1
D3ZJF8	2584	1	274962	1	4	1.10059e-05	0.0035	7.1894	Fc fragment of IgG-binding protein OS=Rattus norvegicus OX=10116 GN=Fcgbp PE=1 SV=3
E9PSP1	496	3	54398.5	3	4	5.73372e-05	0.0625	7.062	Phospholipid transfer protein OS=Rattus norvegicus OX=10116 GN=Pltp PE=1 SV=1
D3Z9D2	1451	0	163433	1	5	2.44997e-05	0.0041	6.9494	FYVE and coiled-coil domain containing 1 (Predicted) OS=Rattus norvegicus OX=10116 GN=Fyco1 PE=1 SV=1
P06866	347	0	38520.5	2	3	6.14681e-05	0.0749	6.9361	Haptoglobin OS=Rattus norvegicus OX=10116 GN=Hp PE=1 SV=3; Additional IDs concatenated into MaxParsimony group: A0A0H2UHM3; Additional IDs concatenated into MaxParsimony group: A0A0H2UHM3
A0A0H2UHM3	346	0	38389.5	2	3	6.16458e-05	0.0751	6.9361	Haptoglobin OS=Rattus norvegicus OX=10116 GN=Hp PE=1 SV=1
D4A0J6	165	0	18473.6	1	4	0.000172359	0.0545	6.4324	Ubiquitin-like domain-containing protein OS=Rattus norvegicus OX=10116 PE=4 SV=3
Q5I0H8	333	1	36634.8	2	3	6.40523e-05	0.024	6.3129	LOC299567 protein (Fragment) OS=Rattus norvegicus OX=10116 GN=LOC299567 PE=2 SV=1; Additional IDs concatenated into MaxParsimony group: M0R485; Additional IDs concatenated into MaxParsimony group: M0R485
F1LZH0	123	0	13584.5	1	4	0.000231213	0.0569	6.1893	Ig-like domain-containing protein OS=Rattus norvegicus OX=10116 PE=1 SV=2
C0M4B0	517	1	58234.2	1	2	2.75041e-05	0.029	6.1523	Matrix metallopeptidase 19 OS=Rattus norvegicus OX=10116 GN=Mmp19 PE=2 SV=1
P97617	83	0	9218.8	2	3	0.000256981	0.2651	5.862	Glyceraldehyde 3-phosphate dehydrogenase (Fragment) OS=Rattus norvegicus OX=10116 GN=GAPDH PE=2 SV=1
Q5U2U0	633	1	69146.7	1	2	2.24639e-05	0.0205	5.6782	ATP-dependent Clp protease ATP-binding subunit clpX-like, mitochondrial OS=Rattus norvegicus OX=10116 GN=Clpx PE=2 SV=1
P16296	462	2	51757.3	2	2	3.07784e-05	0.0844	5.5374	Coagulation factor IX OS=Rattus norvegicus OX=10116 GN=F9 PE=2 SV=2
A0A0G2K4I8	112	0	12658.1	1	2	0.000126961	0.0982	5.5149	Ig-like domain-containing protein OS=Rattus norvegicus OX=10116 PE=1 SV=1
Q9ERF0	144	0	15429.3	1	2	9.87474e-05	0.1042	5.2916	Complement component 7 (Fragment) OS=Rattus norvegicus OX=10116 PE=2 SV=1
B1WC21	685	0	75312.1	2	3	3.11379e-05	0.0277	4.9969	Fibulin-1 OS=Rattus norvegicus OX=10116 GN=Fbln1 PE=1 SV=1
D3ZQ25	705	0	78001.4	2	3	3.02545e-05	0.027	4.9969	Fibulin-1 OS=Rattus norvegicus OX=10116 GN=Fbln1 PE=1 SV=1; Additional IDs concatenated into MaxParsimony group: B1WC21; Additional IDs concatenated into MaxParsimony group: B1WC21
M0R7Q2	117	0	13125.5	1	3	0.000182303	0.0598	4.8561	Ig-like domain-containing protein OS=Rattus norvegicus OX=10116 PE=1 SV=2
F1M3E9	124	0	13761.6	1	3	0.000172012	0.0565	4.8561	Ig-like domain-containing protein OS=Rattus norvegicus OX=10116 PE=4 SV=3
P14630	190	2	21480.5	2	3	0.00011226	0.0684	4.8387	Apolipoprotein M OS=Rattus norvegicus OX=10116 GN=Apom PE=1 SV=2
A0A0G2JX36	119	1	13200.2	1	2	0.000119493	0.0924	4.7969	Ig-like domain-containing protein OS=Rattus norvegicus OX=10116 PE=1 SV=1
Q7TN96	2258	0	251126	1	3	9.44616e-06	0.0035	4.786	Factor VIII OS=Rattus norvegicus OX=10116 GN=F8 PE=2 SV=1
E9JS74	2277	0	253254	1	3	9.36734e-06	0.0035	4.786	Factor VIII OS=Rattus norvegicus OX=10116 PE=2 SV=1
E9JS75	2277	0	253270	1	3	9.36734e-06	0.0035	4.786	Factor VIII OS=Rattus norvegicus OX=10116 PE=2 SV=1
D3ZEB1	2257	0	251014	1	3	9.45035e-06	0.0035	4.786	Coagulation factor VIII OS=Rattus norvegicus OX=10116 GN=F8 PE=3 SV=3
A0A0G2K845	218	0	23433.6	1	2	6.52276e-05	0.055	4.7237	Adiponectin, C1Q and collagen domain-containing OS=Rattus norvegicus OX=10116 GN=Adipoq PE=1 SV=1
Q8K3R4	244	0	26374.9	1	2	5.82771e-05	0.0492	4.7237	30 kDa adipocyte complement-related protein OS=Rattus norvegicus OX=10116 GN=Adipoq PE=1 SV=1; Additional IDs concatenated into MaxParsimony group: A0A0G2K845; Additional IDs concatenated into MaxParsimony group: A0A0G2K845
P63018	646	0	70809.2	1	2	2.20118e-05	0.017	4.5703	Heat shock cognate 71 kDa protein OS=Rattus norvegicus OX=10116 GN=Hspa8 PE=1 SV=1
P55063	641	0	70487.2	1	2	2.21835e-05	0.0172	4.5703	Heat shock 70 kDa protein 1-like OS=Rattus norvegicus OX=10116 GN=Hspa1l PE=2 SV=2
M0RCB1	641	0	70368	1	2	2.21835e-05	0.0172	4.5703	Uncharacterized protein OS=Rattus norvegicus OX=10116 PE=3 SV=1
contaminant_GR78_SCHPO	663	0	73018.3	1	2	2.14474e-05	0.0166	4.5703	78 KD GLUCOSE REGULATED PROTEIN HOMOLOG PRECURSOR (GRP 78) (IMMUNOGLOBULIN...
A0A0G2JUT0	601	0	65996.8	1	2	2.36599e-05	0.0183	4.5703	Heat shock-related 70 kDa protein 2 OS=Rattus norvegicus OX=10116 GN=Hspa2 PE=1 SV=1
M0R8M9	661	0	72631.9	1	2	2.15123e-05	0.0166	4.5703	Uncharacterized protein OS=Rattus norvegicus OX=10116 PE=3 SV=2
P14659	633	0	69580.7	1	2	2.24639e-05	0.0174	4.5703	Heat shock-related 70 kDa protein 2 OS=Rattus norvegicus OX=10116 GN=Hspa2 PE=1 SV=2
D4A4S3	645	0	70665	1	2	2.20459e-05	0.0171	4.5703	Heat shock cognate 71 kDa protein OS=Rattus norvegicus OX=10116 GN=Hspa8 PE=3 SV=3
P0DMW0	641	0	70124.1	1	2	2.21835e-05	0.0172	4.5703	Heat shock 70 kDa protein 1A OS=Rattus norvegicus OX=10116 GN=Hspa1a PE=2 SV=1
contaminant_GR78_LYCES	666	0	73171.8	1	2	2.13508e-05	0.0165	4.5703	78 KD GLUCOSE REGULATED PROTEIN HOMOLOG PRECURSOR (GRP 78) (IMMUNOGLOBULIN...; Additional IDs concatenated into MaxParsimony group: contaminant_GR78_SCHPO, M0R8M9, contaminant_GR78_MOUSE, contaminant_GR78_MESAU, P06761, contaminant_GR78_RAT, contaminant_GR78_HUMAN, P63018, D4A4S3, P55063, M0RCB1, P0DMW0, P0DMW1, P14659, A0A0G2JUT0; Additional IDs concatenated into MaxParsimony group: contaminant_…
contaminant_GR78_RAT	654	0	72284.4	1	2	2.17425e-05	0.0168	4.5703	78 KD GLUCOSE REGULATED PROTEIN PRECURSOR (GRP 78) (IMMUNOGLOBULIN...
P06761	654	0	72284.4	1	2	2.17425e-05	0.0168	4.5703	Endoplasmic reticulum chaperone BiP OS=Rattus norvegicus OX=10116 GN=Hspa5 PE=1 SV=1
contaminant_GR78_MESAU	654	0	72316.4	1	2	2.17425e-05	0.0168	4.5703	78 KD GLUCOSE REGULATED PROTEIN PRECURSOR (GRP 78) (IMMUNOGLOBULIN...
P0DMW1	641	0	70124.1	1	2	2.21835e-05	0.0172	4.5703	Heat shock 70 kDa protein 1B OS=Rattus norvegicus OX=10116 GN=Hspa1b PE=2 SV=1
contaminant_GR78_MOUSE	655	0	72358.5	1	2	2.17093e-05	0.0168	4.5703	78 KD GLUCOSE REGULATED PROTEIN PRECURSOR (GRP 78) (IMMUNOGLOBULIN...
contaminant_GR78_HUMAN	653	0	72053.2	1	2	2.17758e-05	0.0168	4.5703	78 KD GLUCOSE REGULATED PROTEIN PRECURSOR (GRP 78) (IMMUNOGLOBULIN...
M0R485	435	0	47053.2	1	2	3.26888e-05	0.0184	4.3643	Peptidoglycan recognition protein 2 OS=Rattus norvegicus OX=10116 GN=Pglyrp2 PE=1 SV=2
D3ZJI7	388	2	43620.3	2	2	3.66485e-05	0.0515	4.2374	Serine (Or cysteine) peptidase inhibitor, clade B (Ovalbumin), member 11 (Predicted) OS=Rattus norvegicus OX=10116 GN=Serpinb11 PE=3 SV=1
D3ZPL2	105	1	11300.5	1	1	6.77125e-05	0.1714	3.9302	Ig-like domain-containing protein OS=Rattus norvegicus OX=10116 PE=1 SV=3
G3V6S2	889	0	98112.4	1	2	1.59951e-05	0.009	3.6702	Cytoplasmic aconitate hydratase OS=Rattus norvegicus OX=10116 GN=Aco1 PE=1 SV=1; Additional IDs concatenated into MaxParsimony group: Q63270; Additional IDs concatenated into MaxParsimony group: Q63270
Q63270	889	0	98047.3	1	2	1.59951e-05	0.009	3.6702	Cytoplasmic aconitate hydratase OS=Rattus norvegicus OX=10116 GN=Aco1 PE=1 SV=1
D3ZC54	117	1	13103.5	2	2	0.000121535	0.188	3.6272	Ig-like domain-containing protein OS=Rattus norvegicus OX=10116 PE=1 SV=2
Q4QQR7	635	0	69688.5	1	2	2.23931e-05	0.0126	3.543	Dsp protein (Fragment) OS=Rattus norvegicus OX=10116 GN=Dsp PE=2 SV=1
F1LMV6	2877	0	332169	1	2	4.94252e-06	0.0028	3.543	Desmoplakin OS=Rattus norvegicus OX=10116 GN=Dsp PE=1 SV=1; Additional IDs concatenated into MaxParsimony group: Q4QQR7; Additional IDs concatenated into MaxParsimony group: Q4QQR7
F1LYF1	140	0	15248.8	1	1	5.07844e-05	0.1071	3.4993	Ig-like domain-containing protein OS=Rattus norvegicus OX=10116 PE=4 SV=3
F1LVL4	119	0	13060.3	1	2	0.000119493	0.0672	3.3957	Ig-like domain-containing protein OS=Rattus norvegicus OX=10116 PE=4 SV=2
A0A0G2JT70	96	0	10330.9	1	2	0.000148121	0.0833	3.3957	Ig-like domain-containing protein OS=Rattus norvegicus OX=10116 PE=4 SV=1
A0A0G2JXT9	2056	1	221866	1	1	3.45808e-06	0.0063	3.2212	Rho guanine nucleotide exchange factor (GEF) 17 OS=Rattus norvegicus OX=10116 GN=Arhgef17 PE=1 SV=1
Q68FY4	476	0	53465	1	1	1.49366e-05	0.0462	3.0527	Group specific component OS=Rattus norvegicus OX=10116 GN=Gc PE=1 SV=1; Additional IDs concatenated into MaxParsimony group: P04276; Additional IDs concatenated into MaxParsimony group: P04276
P04276	476	0	53491	1	1	1.49366e-05	0.0462	3.0527	Vitamin D-binding protein OS=Rattus norvegicus OX=10116 GN=Gc PE=1 SV=3
Q9WUH4	280	0	31863.8	1	1	2.53922e-05	0.0429	3.0115	Four and a half LIM domains protein 1 OS=Rattus norvegicus OX=10116 GN=Fhl1 PE=2 SV=1
Q8K3G3	210	0	23667.2	1	1	3.38562e-05	0.0571	3.0115	Four and a half LIM domains 1, isoform CRA_e OS=Rattus norvegicus OX=10116 GN=Fhl1 PE=1 SV=1
A0A0G2K338	339	0	37907.4	1	1	2.09729e-05	0.0354	3.0115	Four and a half LIM domains protein 1 OS=Rattus norvegicus OX=10116 GN=Fhl1 PE=1 SV=1; Additional IDs concatenated into MaxParsimony group: Q6P792, Q9WUH4, Q8K3G3; Additional IDs concatenated into MaxParsimony group: Q6P792, Q9WUH4, Q8K3G3
Q6P792	296	0	33537.6	1	1	2.40196e-05	0.0405	3.0115	Four and a half LIM domains 1 OS=Rattus norvegicus OX=10116 GN=Fhl1 PE=1 SV=1
P09650	260	1	28580.8	1	1	2.73454e-05	0.0423	2.959	Mast cell protease 1 OS=Rattus norvegicus OX=10116 GN=Mcpt1 PE=1 SV=3
A0A0G2JYX6	94	1	10841.9	1	2	0.000151273	0.1064	2.8995	1-acylglycerol-3-phosphate O-acyltransferase 1 (Fragment) OS=Rattus norvegicus OX=10116 GN=Agpat1 PE=4 SV=1
D4A3L8	132	0	14665.5	1	2	0.000107724	0.053	2.8754	Ig-like domain-containing protein OS=Rattus norvegicus OX=10116 PE=4 SV=2
A0A0G2JWX0	141	0	15477.8	1	2	0.000100848	0.0496	2.8754	Ig-like domain-containing protein OS=Rattus norvegicus OX=10116 PE=1 SV=1
A0A0G2K9W1	132	0	14639.4	1	2	0.000107724	0.053	2.8754	Ig-like domain-containing protein OS=Rattus norvegicus OX=10116 PE=4 SV=1
F1M6G9	132	0	14636.4	1	2	0.000107724	0.053	2.8754	Ig-like domain-containing protein OS=Rattus norvegicus OX=10116 PE=4 SV=2
A0A0H2UHR7	2693	0	287104	1	1	2.64011e-06	0.0041	2.7986	Filamin-C OS=Rattus norvegicus OX=10116 GN=Flnc PE=1 SV=1
A0A0G2JXT8	2602	0	277652	1	1	2.73244e-06	0.0042	2.7986	Filamin B OS=Rattus norvegicus OX=10116 GN=Flnb PE=1 SV=1
C0JPT7	2639	0	280302	1	1	2.69413e-06	0.0042	2.7986	Filamin A OS=Rattus norvegicus OX=10116 GN=Flna PE=1 SV=1
D3ZHA0	2726	0	290786	1	1	2.60815e-06	0.004	2.7986	Filamin-C OS=Rattus norvegicus OX=10116 GN=Flnc PE=1 SV=1; Additional IDs concatenated into MaxParsimony group: A0A0H2UHR7, C0JPT7, A0A0G2JXT8, D4A8D5; Additional IDs concatenated into MaxParsimony group: A0A0H2UHR7, C0JPT7, A0A0G2JXT8, D4A8D5
D4A8D5	2578	0	275126	1	1	2.75788e-06	0.0043	2.7986	Filamin B OS=Rattus norvegicus OX=10116 GN=Flnb PE=1 SV=1
Q5FVN3	117	1	13074.7	1	1	6.07676e-05	0.1111	2.6229	Ccl9-like protein OS=Rattus norvegicus OX=10116 GN=Ccl9 PE=1 SV=1
Q5RJN2	493	0	53099.5	1	1	1.44215e-05	0.0325	2.5765	Pcolce protein OS=Rattus norvegicus OX=10116 GN=Pcolce PE=1 SV=1; Additional IDs concatenated into MaxParsimony group: O08628; Additional IDs concatenated into MaxParsimony group: O08628
O08628	468	0	50135	1	1	1.51919e-05	0.0342	2.5765	Procollagen C-endopeptidase enhancer 1 OS=Rattus norvegicus OX=10116 GN=Pcolce PE=1 SV=1
Q5FVK4	74	1	8736.5	1	1	9.60785e-05	0.2838	2.5055	Sf3b1 protein OS=Rattus norvegicus OX=10116 GN=Sf3b1 PE=2 SV=1
Reverse_Q0ZFS4	105	1	12346.5	1	2	0.000135425	0.0667	2.5014
O08619	732	0	82588.4	1	1	9.71286e-06	0.0164	2.2624	Coagulation factor XIII A chain OS=Rattus norvegicus OX=10116 GN=F13a1 PE=2 SV=3; Additional IDs concatenated into MaxParsimony group: G3V811; Additional IDs concatenated into MaxParsimony group: G3V811
G3V811	732	0	82983.6	1	1	9.71286e-06	0.0164	2.2624	Coagulation factor XIII A chain OS=Rattus norvegicus OX=10116 GN=F13a1 PE=1 SV=1
Q6P0K8	745	0	81730.8	1	1	9.54337e-06	0.0242	2.1961	Junction plakoglobin OS=Rattus norvegicus OX=10116 GN=Jup PE=1 SV=1; Additional IDs concatenated into MaxParsimony group: P70565
P70565	745	0	81707.7	1	1	9.54337e-06	0.0242	2.1961	Plakoglobin OS=Rattus norvegicus OX=10116 PE=2 SV=1; Additional IDs concatenated into MaxParsimony group: Q6P0K8
contaminant_TRYPSIN	229	1	23959.6	1	1	3.10472e-05	0.0349	2.1116
D3ZD67	492	1	57194.4	1	1	1.44508e-05	0.0488	2.102	Preferentially-expressed antigen in melanoma-like 6 OS=Rattus norvegicus OX=10116 GN=Pramel6 PE=4 SV=1
Q6MG64	892	1	95967.4	1	1	7.97064e-06	0.0471	2.0924	von Willebrand factor A domain-containing protein 7 OS=Rattus norvegicus OX=10116 GN=Vwa7 PE=3 SV=1
A0A0G2K6H2	215	0	23829.5	1	1	3.30689e-05	0.0605	2.0221	Maleylacetoacetate isomerase OS=Rattus norvegicus OX=10116 GN=Gstz1 PE=1 SV=1
P57113	216	0	23927.5	1	1	3.29158e-05	0.0602	2.0221	Maleylacetoacetate isomerase OS=Rattus norvegicus OX=10116 GN=Gstz1 PE=1 SV=2; Additional IDs concatenated into MaxParsimony group: A0A0G2K6H2; Additional IDs concatenated into MaxParsimony group: A0A0G2K6H2
Reverse_G3V7M6	200	0	22831.6	1	1	3.55491e-05	0.085	1.9327
Reverse_P20294	200	0	22821.6	1	1	3.55491e-05	0.085	1.9327	; Additional IDs concatenated into MaxParsimony group: Reverse_G3V7M6; Additional IDs concatenated into MaxParsimony group: Reverse_G3V7M6
D3ZHX3	199	1	22465.6	1	1	3.57277e-05	0.0553	1.8887	DIRAS family GTPase 2 OS=Rattus norvegicus OX=10116 GN=Diras2 PE=4 SV=1
A0A0G2K0N6	97	1	10728.2	1	1	7.3297e-05	0.1031	1.8795	Ig-like domain-containing protein OS=Rattus norvegicus OX=10116 PE=1 SV=1
Q62704	136	0	15349.9	1	1	5.2278e-05	0.0956	1.7459	Nonmuscle myosin heavy chain-A (Fragment) OS=Rattus norvegicus OX=10116 PE=2 SV=1
Q8K4T8	30	0	3147.7	1	1	0.000236994	0.2667	1.7199	Glyceraldehyde-3-phosphate-dehydrogenase (Fragment) OS=Rattus norvegicus OX=10116 GN=GAPDH PE=4 SV=1
P55797	124	1	14504.4	1	1	5.73372e-05	0.0887	1.6976	Apolipoprotein C-IV OS=Rattus norvegicus OX=10116 GN=Apoc4 PE=2 SV=2
P04638	102	1	11413.9	1	1	6.9704e-05	0.1078	1.6864	Apolipoprotein A-II OS=Rattus norvegicus OX=10116 GN=Apoa2 PE=2 SV=1
M0RE02	117	0	12770.3	1	1	6.07676e-05	0.0598	1.6732	Ig-like domain-containing protein OS=Rattus norvegicus OX=10116 PE=1 SV=2
M0R693	117	0	12679.3	1	1	6.07676e-05	0.0598	1.6732	Ig-like domain-containing protein OS=Rattus norvegicus OX=10116 PE=4 SV=1
F1M5L5	117	0	12887.3	1	1	6.07676e-05	0.0769	1.5891	Ig-like domain-containing protein OS=Rattus norvegicus OX=10116 PE=1 SV=2
P23347	1234	0	136532	1	1	5.7616e-06	0.0049	1.5589	Anion exchange protein 2 OS=Rattus norvegicus OX=10116 GN=Slc4a2 PE=1 SV=1
A0A0G2JVD6	5840	0	628417	1	1	1.21743e-06	0.001	1.5589	5'-AMP-activated protein kinase subunit gamma-1 OS=Rattus norvegicus OX=10116 GN=Kmt2d PE=1 SV=1; Additional IDs concatenated into MaxParsimony group: A0A0G2K929, A0A0G2K715, P23347; Additional IDs concatenated into MaxParsimony group: A0A0G2K929, A0A0G2K715, P23347
A0A0G2K929	2756	0	320518	1	1	2.57976e-06	0.0022	1.5589	Centrosomal protein 290 OS=Rattus norvegicus OX=10116 GN=Cep290 PE=4 SV=1
A0A0G2K715	2479	0	289486	1	1	2.86802e-06	0.0024	1.5589	Centrosomal protein 290 OS=Rattus norvegicus OX=10116 GN=Cep290 PE=4 SV=1
Reverse_Q4QQS6	324	1	36815.3	1	1	2.19439e-05	0.0586	1.4734
B2GVB4	550	0	61975	1	1	1.29269e-05	0.0127	1.4364	Sept9 protein (Fragment) OS=Rattus norvegicus OX=10116 GN=Sept9 PE=2 SV=1
F1LN75	566	0	63741.8	1	1	1.25615e-05	0.0124	1.4364	Septin 9 OS=Rattus norvegicus OX=10116 GN=Sept9 PE=1 SV=3; Additional IDs concatenated into MaxParsimony group: Q9QZR6, B2GVB4; Additional IDs concatenated into MaxParsimony group: Q9QZR6, B2GVB4
Q9QZR6	564	0	63734	1	1	1.2606e-05	0.0124	1.4364	Septin-9 OS=Rattus norvegicus OX=10116 GN=Septin9 PE=1 SV=1
B6VNU2	46	0	5309.5	1	1	0.000154561	0.1739	1.3398	Phospholipase A2 (Fragment) OS=Rattus norvegicus OX=10116 GN=Pla2g2a PE=3 SV=1
B6VNU1	46	0	5325.5	1	1	0.000154561	0.1739	1.3398	Phospholipase A2 (Fragment) OS=Rattus norvegicus OX=10116 GN=Pla2g2a PE=3 SV=1
Q99MC5	128	1	14530.6	1	1	5.55454e-05	0.0625	1.3083	Hepatocyte growth factor receptor (Fragment) OS=Rattus norvegicus OX=10116 PE=2 SV=1

## Sheet: Table S1F
Table S1F - Number and percentage of proteins found related to each biological process for the Ba-MNPs incubated in plasma for 2 h.
	Ba-MNPs (2 h)
	Biological Process	Number	Percentage
	Metabolic Processes	99	0.1502
	Cell Adhesion	27	0.041
	Transport of Molecules	32	0.0486
	Inflammatory Processes	41	0.0622
	Immunological Processes	262	0.3976
	Coagulation Processes	74	0.1123
	Others	124	0.1882
	TOTAL	659
	The cells that were not painted were considered contamination

## Sheet: Table S1G
Table S1G - Proteomic data and classification for the Cit-MNPs incubated in plasma for 30 min.
Locus	Length	Unique peptides	Mol w	Sequence count	Spectrum count	NSAF	Coverage	Protein Score	Description
M0RBF1	1663	21	186188	161	2090	0.0102975	0.7306	6816.67	Complement C3 OS=Rattus norvegicus OX=10116 GN=C3 PE=1 SV=1; Additional IDs concatenated into MaxParsimony group: M0RBJ7, P01026; Additional IDs concatenated into MaxParsimony group: M0RBJ7, P01026
M0RBJ7	1662	0	186100	140	1969	0.00970719	0.704	6362.46	Complement C3 OS=Rattus norvegicus OX=10116 GN=C3 PE=1 SV=1
P01026	1663	0	186324	127	1796	0.00884897	0.6476	5785.02	Complement C3 OS=Rattus norvegicus OX=10116 GN=C3 PE=1 SV=3
contaminant_INT-STD1	607	71	69207.4	75	1001	0.0135121	0.6656	2909.83	BSA
M0RB00	1734	8	190460	68	654	0.00309035	0.4279	2246.54	Complement C4A OS=Rattus norvegicus OX=10116 GN=C4a PE=4 SV=2; Additional IDs concatenated into MaxParsimony group: A0A0G2JW12, Q6MG79, P08649, F1LNM4, A0A0G2JV52; Additional IDs concatenated into MaxParsimony group: A0A0G2JW12, Q6MG79, P08649, F1LNM4, A0A0G2JV52
contaminant_KERATIN03	593	25	59464.9	49	609	0.00841476	0.5497	2245.78	; Additional IDs concatenated into MaxParsimony group: Q6IFW6, A0A0G2K9Q9, contaminant_KERATIN12, Q6IFV1, Q6IFU7, Q6IFV3, contaminant_KERATIN06, Q63279, contaminant_KERATIN10, Q6IFV0, Q6IFU9, contaminant_KERATIN04, Q6IFV4, A0A221LEF7, Q6IFW8, Q6IFX0, A0A0G2JU48, Q5BJY9, A0A0G2JW58, Q6IFX1, A0A0G2K4H9, Q6IFV5, Q6IFW5, Q6IFV6, F1MAS0, Q6IFV7, D3Z7Y6, Q6IFW2, contaminant_KERATIN09, P25030, contamina…
Q6MG79	1737	0	192052	62	647	0.00305199	0.4444	2233.61	Complement component 4, gene 1 OS=Rattus norvegicus OX=10116 GN=C4a PE=4 SV=1
P08649	1737	0	192024	62	647	0.00305199	0.4444	2233.61	Complement C4 OS=Rattus norvegicus OX=10116 GN=C4 PE=1 SV=3
F1LNM4	1549	0	170428	62	647	0.00342241	0.4984	2233.61	Complement C4-like (Fragment) OS=Rattus norvegicus OX=10116 GN=LOC103689965 PE=4 SV=2
A0A0G2JW12	1737	0	192109	62	647	0.00305199	0.4444	2233.61	Complement C4-like OS=Rattus norvegicus OX=10116 GN=LOC103689965 PE=4 SV=1
A0A0G2JV52	1374	0	150790	60	635	0.00378674	0.54	2201.65	Complement C4A (Fragment) OS=Rattus norvegicus OX=10116 GN=C4a PE=4 SV=4
Q71SA3	1170	12	129570	58	686	0.00480416	0.4855	2020.27	Thrombospondin 1 OS=Rattus norvegicus OX=10116 GN=Thbs1 PE=2 SV=1; Additional IDs concatenated into MaxParsimony group: A0A0G2JV24, D4A2G6, P49744, A0A0G2K7L8, F1LMS5, A0A0G2JZH3, P35444, M0RBU0, A0A0G2JXN9; Additional IDs concatenated into MaxParsimony group: A0A0G2JV24, D4A2G6, P49744, A0A0G2K7L8, F1LMS5, A0A0G2JZH3, M0RBU0, P35444, A0A0G2JXN9
Q5M7T5	465	21	52182.8	43	545	0.00960334	0.5871	1879.06	Serine (Or cysteine) peptidase inhibitor, clade C (Antithrombin), member 1 OS=Rattus norvegicus OX=10116 GN=Serpinc1 PE=1 SV=1; Additional IDs concatenated into MaxParsimony group: Q7TPI9, A0A096MIW4; Additional IDs concatenated into MaxParsimony group: Q7TPI9, A0A096MIW4
Q62905	478	6	54626.2	32	595	0.0101992	0.5042	1856.48	Vitronectin OS=Rattus norvegicus OX=10116 PE=2 SV=1; Additional IDs concatenated into MaxParsimony group: Q7TQ11, Q3KR94; Additional IDs concatenated into MaxParsimony group: Q7TQ11, Q3KR94
Q6MG90	1737	6	191988	53	515	0.00242933	0.3805	1798.64	Complement C4B (Chido blood group) OS=Rattus norvegicus OX=10116 GN=C4b PE=1 SV=1
Q3KR94	478	0	54672.2	26	569	0.00975356	0.5042	1797.96	Vitronectin OS=Rattus norvegicus OX=10116 GN=Vtn PE=1 SV=1
Q7TQ11	490	0	55906.7	26	569	0.0095147	0.4918	1797.96	Aa1018 OS=Rattus norvegicus OX=10116 GN=Vtn PE=1 SV=1
Q01177	812	27	90458.9	56	518	0.005227	0.6527	1557.19	Plasminogen OS=Rattus norvegicus OX=10116 GN=Plg PE=2 SV=2
P14046	1477	1	163652	68	498	0.00276266	0.4631	1542.73	Alpha-1-inhibitor 3 OS=Rattus norvegicus OX=10116 GN=A1i3 PE=1 SV=1; Additional IDs concatenated into MaxParsimony group: A0A0G2K926, D4AA52, A0A0G2JUW7, A0A0G2JUP5, Q6IE52, M0R5V7, P06238, Q5D1M8; Additional IDs concatenated into MaxParsimony group: A0A0G2K926, D4AA52, A0A0G2JUW7, A0A0G2JUP5, Q6IE52, M0R5V7, P06238, Q5D1M8
A0A0G2K926	1477	0	163600	65	477	0.00264616	0.4394	1482.27	Murinoglobulin-1 OS=Rattus norvegicus OX=10116 GN=LOC297568 PE=1 SV=1
O35802	932	9	103525	47	439	0.00385947	0.4989	1469.91	Inter-alpha-inhibitor H4 heavy chain OS=Rattus norvegicus OX=10116 GN=ITIH4 PE=2 SV=1; Additional IDs concatenated into MaxParsimony group: D3ZFC6; Additional IDs concatenated into MaxParsimony group: D3ZFC6
Q5EBC0	933	2	103673	41	434	0.00381142	0.552	1465.43	Inter alpha-trypsin inhibitor, heavy chain 4 OS=Rattus norvegicus OX=10116 GN=Itih4 PE=1 SV=1
D3ZFC6	932	0	103667	39	427	0.00375397	0.529	1452.29	Inter-alpha-trypsin inhibitor heavy chain 4 OS=Rattus norvegicus OX=10116 GN=Itih4 PE=1 SV=3
D4AA52	1477	0	163598	63	463	0.0025685	0.4184	1429.18	Murinoglobulin-1 OS=Rattus norvegicus OX=10116 GN=LOC297568 PE=1 SV=3
A0A0G2K3G0	536	5	60313.2	32	467	0.00713889	0.4757	1392.73	Histidine-rich glycoprotein OS=Rattus norvegicus OX=10116 GN=Hrg PE=1 SV=1; Additional IDs concatenated into MaxParsimony group: Q99PS8, A0A0G2K9Y5; Additional IDs concatenated into MaxParsimony group: Q99PS8, A0A0G2K9Y5
contaminant_KERATIN13	643	32	65436.5	47	449	0.00572156	0.5303	1377.55	; Additional IDs concatenated into MaxParsimony group: Q6P6Q2, F7FFV2, Q6IG02, A0A0G2JWX4, Q6IMF3, A0A0G2JST3, Q4FZU2, contaminant_KERATIN14, A0A0H2UHH5, Q6IG05, A0A0G2JW69, Q63280, contaminant_KERATIN15, A0A0G2JZQ9, Q6IG01, Q10758, A0A0G2JVA8, Q6IG00, G3V908, A0A0G2K6P7, contaminant_KERATIN20, Q6IFZ5, A0A0G2JUG1, Q6IG03, A0A0G2JXH6, A0A0G2K7N1, Q6IG04, Q63282; Additional IDs concatenated into Ma…
Q68FP1	780	45	85996.1	45	386	0.00405482	0.5449	1349.73	Gelsolin OS=Rattus norvegicus OX=10116 GN=Gsn PE=1 SV=1
A0A0G2K9Y5	515	0	57872.2	27	443	0.00704815	0.4951	1341.63	Histidine-rich glycoprotein OS=Rattus norvegicus OX=10116 GN=Hrg PE=1 SV=1
Q99PS8	525	0	58993.7	27	443	0.0069139	0.4857	1341.63	Histidine-rich glycoprotein OS=Rattus norvegicus OX=10116 GN=Hrg PE=1 SV=1
P02091	147	0	15951.2	21	463	0.0258073	0.8912	1324.69	Hemoglobin subunit beta-1 OS=Rattus norvegicus OX=10116 GN=Hbb PE=1 SV=3; Additional IDs concatenated into MaxParsimony group: A0A1K0FUA6, A0A0G2JTW9, Q63011, Q62670, Q63223, O88752
D4A6E3	1487	8	165203	65	434	0.00239143	0.3914	1297.38	Murinoglobulin-1 OS=Rattus norvegicus OX=10116 GN=Mug1 PE=1 SV=2
A0A0G2JSW3	147	2	15937.2	21	450	0.0250827	0.8095	1293.67	Globin a4 OS=Rattus norvegicus OX=10116 GN=Hbb PE=1 SV=1; Additional IDs concatenated into MaxParsimony group: P02091, A0A1K0FUA6, A0A0G2JTW9, Q63011, Q62670, Q63223, O88752
M0R979	1144	2	126942	49	466	0.00333763	0.424	1284.64	Thrombospondin 1 OS=Rattus norvegicus OX=10116 GN=Thbs1 PE=1 SV=2
Q32Q89	427	4	48319.6	33	417	0.00800179	0.541	1260.48	Fgl2 protein (Fragment) OS=Rattus norvegicus OX=10116 GN=Fgl2 PE=2 SV=1; Additional IDs concatenated into MaxParsimony group: G3V7P2, Q5U3X5, Q6IN12, Q9EPT7; Additional IDs concatenated into MaxParsimony group: G3V7P2, Q5U3X5, Q6IN12, Q9EPT7
Q03626	1487	0	165203	58	420	0.00231429	0.4048	1258.79	Murinoglobulin-1 OS=Rattus norvegicus OX=10116 GN=Mug1 PE=2 SV=1
Q5U3X5	422	0	47753.3	29	411	0.0079801	0.5474	1248.21	Fgl2 protein (Fragment) OS=Rattus norvegicus OX=10116 GN=Fgl2 PE=2 SV=1
Q6IN12	419	0	47367.1	29	411	0.00803724	0.5513	1248.21	Fgl2 protein (Fragment) OS=Rattus norvegicus OX=10116 GN=Fgl2 PE=2 SV=1
G3V7P2	429	0	48606.8	29	411	0.00784989	0.5385	1248.21	Fibrinogen-like 2 OS=Rattus norvegicus OX=10116 GN=Fgl2 PE=1 SV=1
A0A0G2JUW7	1487	0	165637	57	409	0.00225367	0.3914	1230.96	Murinoglobulin-1 OS=Rattus norvegicus OX=10116 GN=Mug1 PE=4 SV=1
contaminant_KERATIN22	645	37	65807.4	46	365	0.00463673	0.7504	1193.73
contaminant_KERATIN02	622	44	61931.8	45	330	0.00434713	0.6158	1164.01
Q9EPT7	357	0	40921.9	24	384	0.00881337	0.5294	1148.3	Prothrombinase FGL2 OS=Rattus norvegicus OX=10116 PE=2 SV=1
A0A0G2JV24	1152	0	127771	43	417	0.00296594	0.3872	1123.56	Thrombospondin 1 OS=Rattus norvegicus OX=10116 GN=Thbs1 PE=1 SV=1
Q6P734	504	21	55558.1	21	311	0.00505602	0.4821	1118.65	Plasma protease C1 inhibitor OS=Rattus norvegicus OX=10116 GN=Serping1 PE=2 SV=1
A0A0G2JUP5	1450	0	161244	52	368	0.0020795	0.3676	1075.82	Murinoglobulin-1 OS=Rattus norvegicus OX=10116 GN=Mug1 PE=4 SV=1
F7F389	580	0	65225.1	32	362	0.00511399	0.4897	1043.38	Complement component C9 OS=Rattus norvegicus OX=10116 GN=C9 PE=1 SV=1; Additional IDs concatenated into MaxParsimony group: Q5BKC4, Q62930; Additional IDs concatenated into MaxParsimony group: Q5BKC4, Q62930
Q5BKC4	567	0	63715.5	32	362	0.00523124	0.5009	1043.38	C9 protein OS=Rattus norvegicus OX=10116 GN=C9 PE=2 SV=1
Q62930	554	0	62222.6	31	360	0.00532441	0.5018	1041.04	Complement component C9 OS=Rattus norvegicus OX=10116 GN=C9 PE=1 SV=1
P02770	608	2	68668.1	40	357	0.00481109	0.5428	1038.74	Serum albumin OS=Rattus norvegicus OX=10116 GN=Alb PE=1 SV=2
A0A096P6L8	2477	6	272258	57	320	0.00105853	0.2996	1030.3	Fibronectin OS=Rattus norvegicus OX=10116 GN=Fn1 PE=1 SV=2; Additional IDs concatenated into MaxParsimony group: P04937, Q9Z1G8, Reverse_F1LPM1, Reverse_O88277, Q6LC76; Additional IDs concatenated into MaxParsimony group: P04937, Q9Z1G8, Reverse_O88277, Reverse_F1LPM1, Q6LC76
F1LST1	2387	1	262573	52	312	0.00107098	0.3201	1012.75	Fibronectin OS=Rattus norvegicus OX=10116 GN=Fn1 PE=1 SV=3
A0A0G2JSH5	608	3	68696.1	41	351	0.00473023	0.5329	1009.22	Serum albumin OS=Rattus norvegicus OX=10116 GN=Alb PE=1 SV=1
P04937	2477	0	272323	51	310	0.00102545	0.2996	1008.14	Fibronectin OS=Rattus norvegicus OX=10116 GN=Fn1 PE=1 SV=2
Q6IE52	1448	0	161469	44	334	0.00188998	0.297	990.529	Murinoglobulin-2 OS=Rattus norvegicus OX=10116 GN=Mug2 PE=1 SV=1
P11517	147	0	15954.3	18	363	0.0202334	0.6735	970.727	Hemoglobin subunit beta-2 OS=Rattus norvegicus OX=10116 PE=1 SV=2
A0A1K0FUA6	147	0	15954.3	18	363	0.0202334	0.6735	970.727	Globin a2 OS=Rattus norvegicus OX=10116 GN=LOC689064 PE=3 SV=1
M0R5V7	1365	0	151849	42	324	0.00194487	0.3062	956.276	Murinoglobulin-2 OS=Rattus norvegicus OX=10116 GN=Mug2 PE=1 SV=2
Q6IFW6	526	0	56452.5	23	269	0.0041903	0.2738	950.897	Keratin, type I cytoskeletal 10 OS=Rattus norvegicus OX=10116 GN=Krt10 PE=3 SV=1
A0A0G2K2V6	559	0	56760.7	23	269	0.00394293	0.2576	950.897	Keratin, type I cytoskeletal 10 OS=Rattus norvegicus OX=10116 GN=Krt10 PE=1 SV=1
Q569B8	590	2	65028.6	23	295	0.00409684	0.3898	922.753	Igh-6 protein OS=Rattus norvegicus OX=10116 GN=Igh-6 PE=2 SV=1; Additional IDs concatenated into MaxParsimony group: Q4QQW0, Q569B3, Q3B8R4, F1LPW0, F1LM30, A0A0G2JVP4, Q5BK05, Q5BJZ2, P20760, Q5RK07, F1LPQ6, A0A0G2K9Y0, A0A0G2K477, F1LN61, Q4VBH1, P20759, Q3SYP8, A0A0G2JT95, A0A0G2K290, A0A0G2JWW4, M0RBL2, M0R8Q9, A0A0G2K304, A0A0G2K4A4, F1LYU3, A0A0G2K3A6, F8SQR6, contaminant_NRL_1IKFH, contami…
Q4QQW0	591	0	64869.2	22	291	0.00403445	0.401	913.889	Igh-6 protein (Fragment) OS=Rattus norvegicus OX=10116 GN=Igh-6 PE=2 SV=1
Q3B8R4	595	0	65488.8	21	290	0.00399356	0.3866	912.458	Igh-6 protein OS=Rattus norvegicus OX=10116 GN=Igh-6 PE=2 SV=1
F1LPW0	495	0	54818.3	21	290	0.00480034	0.4646	912.458	Immunoglobulin heavy constant mu OS=Rattus norvegicus OX=10116 GN=Ighm PE=1 SV=1
A0A0G2JVP4	470	0	51657.8	21	290	0.00505567	0.4894	912.458	Immunoglobulin heavy constant mu OS=Rattus norvegicus OX=10116 GN=Ighm PE=1 SV=1
Q569B3	617	0	68300.2	21	290	0.00385116	0.3728	912.458	Igh-6 protein OS=Rattus norvegicus OX=10116 GN=Igh-6 PE=2 SV=1
F1LM30	480	0	52893.3	21	290	0.00495035	0.4792	912.458	Immunoglobulin heavy constant mu OS=Rattus norvegicus OX=10116 GN=Ighm PE=1 SV=3
A0A0G2JTW9	147	0	15960.3	16	306	0.0170562	0.7279	906.263	Beta-globin OS=Rattus norvegicus OX=10116 GN=Hbb-b1 PE=1 SV=1
A0A0G2JSK1	416	1	46430	23	244	0.00480591	0.4952	872.477	RCG20603 OS=Rattus norvegicus OX=10116 GN=Serpina3c PE=3 SV=1
P05545	416	5	46514.1	25	232	0.00456955	0.4856	833.214	Serine protease inhibitor A3K OS=Rattus norvegicus OX=10116 GN=Serpina3k PE=1 SV=3; Additional IDs concatenated into MaxParsimony group: Q7TMB9, F1LM05, A0A0G2JYK0, E0A3N4, A0A0G2KB85, P09006, A0A0H2UHI5, P09005, Q63556, F1M8F5; Additional IDs concatenated into MaxParsimony group: Q7TMB9, F1LM05, A0A0G2JYK0, E0A3N4, A0A0G2KB85, P09006, A0A0H2UHI5, P09005, Q63556, F1M8F5
Q7TP84	759	2	85982.9	31	273	0.00294713	0.4018	828.404	Plasminogen OS=Rattus norvegicus OX=10116 GN=Plg PE=1 SV=1
Q7TPI9	593	0	66431.7	22	246	0.00339906	0.2293	821.311	Ac2-248 OS=Rattus norvegicus OX=10116 PE=2 SV=1
Q5M891	601	0	67139.6	31	321	0.00437632	0.5008	766.517	C4b-binding protein alpha chain OS=Rattus norvegicus OX=10116 GN=C4bpa PE=1 SV=1
Q63514	558	0	62207	31	321	0.00471357	0.5394	766.517	C4b-binding protein alpha chain OS=Rattus norvegicus OX=10116 GN=C4bpa PE=2 SV=1
Q5RK07	371	0	40833.6	18	240	0.00530049	0.5418	745.691	Igh-6 protein (Fragment) OS=Rattus norvegicus OX=10116 GN=Igh-6 PE=2 SV=1
A9CME3	600	4	66973.5	33	305	0.00416512	0.4583	718.929	Complement component 4 binding protein, alpha OS=Rattus norvegicus OX=10116 GN=C4bpa PE=4 SV=1; Additional IDs concatenated into MaxParsimony group: Q63514; Additional IDs concatenated into MaxParsimony group: Q63514
P01946	142	2	15300.8	14	249	0.0143678	0.6408	710.26	Hemoglobin subunit alpha-1/2 OS=Rattus norvegicus OX=10116 GN=Hba1 PE=1 SV=3; Additional IDs concatenated into MaxParsimony group: B1H216, A0A0G2JSV6, G3V8R3; Additional IDs concatenated into MaxParsimony group: B1H216, A0A0G2JSV6, G3V8R3
A0A0G2JSV6	142	0	15256.8	12	240	0.0138485	0.6408	686.442	Globin c2 OS=Rattus norvegicus OX=10116 GN=Hba-a2 PE=1 SV=1
B1H216	142	0	15300.8	12	240	0.0138485	0.6408	686.442	Globin c3 OS=Rattus norvegicus OX=10116 GN=Hba-a1 PE=2 SV=1
F1M6Z1	4506	4	509358	65	233	0.000423686	0.1762	668.352	Apolipoprotein B-100 OS=Rattus norvegicus OX=10116 GN=Apob PE=1 SV=1; Additional IDs concatenated into MaxParsimony group: Q7TMA5, Q62970, Q64721, Q4G047, Q63051, Q78EF2; Additional IDs concatenated into MaxParsimony group: Q7TMA5, Q62970, Q64721, Q4G047, Q63051, Q78EF2
G3V9J1	872	8	97260	32	228	0.00214238	0.2993	663.988	Uncharacterized protein OS=Rattus norvegicus OX=10116 PE=1 SV=3
Q7TMA5	4743	0	535670	61	228	0.000393877	0.1674	659.541	Apolipoprotein B-100 OS=Rattus norvegicus OX=10116 GN=Apob PE=1 SV=1
Q63041	1500	41	167001	41	222	0.00121266	0.3593	652.044	Alpha-1-macroglobulin OS=Rattus norvegicus OX=10116 GN=A1m PE=1 SV=1
Q63011	146	0	15878.2	16	227	0.0127395	0.8219	646.346	Zero beta-globin (Fragment) OS=Rattus norvegicus OX=10116 PE=3 SV=1
Q6PDU6	147	0	16009.2	16	227	0.0126528	0.8163	646.346	Beta-glo OS=Rattus norvegicus OX=10116 GN=Hbb-b1 PE=2 SV=1
Q62669	147	2	15994.2	17	224	0.0124856	0.7279	636.385	Beta-globin OS=Rattus norvegicus OX=10116 GN=LOC103694855 PE=1 SV=1
Q5M8C3	423	5	47998.9	21	210	0.00406778	0.3948	622.386	Serine (Or cysteine) proteinase inhibitor, clade A (Alpha-1 antiproteinase, antitrypsin), member 4 OS=Rattus norvegicus OX=10116 GN=Serpina4 PE=1 SV=1; Additional IDs concatenated into MaxParsimony group: P97569; Additional IDs concatenated into MaxParsimony group: P97569
Q5FVS2	638	1	71218	35	225	0.00288962	0.5533	621.66	Kallikrein B, plasma 1 OS=Rattus norvegicus OX=10116 GN=Klkb1 PE=1 SV=1; Additional IDs concatenated into MaxParsimony group: P14272; Additional IDs concatenated into MaxParsimony group: P14272
P14272	638	0	71209	34	222	0.00285109	0.5533	618.202	Plasma kallikrein OS=Rattus norvegicus OX=10116 GN=Klkb1 PE=1 SV=1
Q7TMB9	611	0	68162.5	24	177	0.00237362	0.3797	606.549	Ab1-021 OS=Rattus norvegicus OX=10116 GN=LOC299282 PE=2 SV=1
F1LM05	610	0	68105.5	24	177	0.00237751	0.3803	606.549	Serine protease inhibitor A3N OS=Rattus norvegicus OX=10116 GN=LOC299282 PE=1 SV=1
A0A0G2JYK0	609	0	67922.4	24	177	0.00238141	0.381	606.549	Serine protease inhibitor A3N OS=Rattus norvegicus OX=10116 GN=LOC299282 PE=1 SV=1
A0A096P6L9	1681	1	188943	33	190	0.000926115	0.2909	596.976	Complement C5 OS=Rattus norvegicus OX=10116 GN=C5 PE=1 SV=2; Additional IDs concatenated into MaxParsimony group: A0A1B0GWS5, A0A1B0GWQ4; Additional IDs concatenated into MaxParsimony group: A0A1B0GWS5, A0A1B0GWQ4
P97569	423	0	47972.9	16	196	0.0037966	0.3546	595.221	Kallistatin OS=Rattus norvegicus OX=10116 PE=2 SV=1
G3V843	617	3	70322.6	23	189	0.00250989	0.3144	583.76	Prothrombin OS=Rattus norvegicus OX=10116 GN=F2 PE=1 SV=1; Additional IDs concatenated into MaxParsimony group: P18292; Additional IDs concatenated into MaxParsimony group: P18292
Q5M7V3	461	0	50898.3	23	204	0.00362584	0.59	577.079	LOC367586 protein OS=Rattus norvegicus OX=10116 GN=LOC367586 PE=2 SV=1
G3V7Z4	397	2	44003.3	21	187	0.00385949	0.4484	575.484	Glia-derived nexin OS=Rattus norvegicus OX=10116 GN=Serpine2 PE=3 SV=1; Additional IDs concatenated into MaxParsimony group: P07092, D3ZPF9, D3ZJK2, Q6IE44, F1MAA9; Additional IDs concatenated into MaxParsimony group: P07092, D3ZPF9, D3ZJK2, Q6IE44, F1MAA9
P18292	617	0	70348.7	20	182	0.00241694	0.3144	572.964	Prothrombin OS=Rattus norvegicus OX=10116 GN=F2 PE=1 SV=1
P08934	639	3	70870.8	27	192	0.00246195	0.4413	565.77	Kininogen-1 OS=Rattus norvegicus OX=10116 GN=Kng1 PE=2 SV=1; Additional IDs concatenated into MaxParsimony group: P01048, F7EUK4, P08932, A0A0G2KA54, Q63581, A0A0G2KAY3, Q6LE95, Q6LEK4; Additional IDs concatenated into MaxParsimony group: P01048, F7EUK4, P08932, A0A0G2KA54, Q63581, A0A0G2KAY3, Q6LE95, Q6LEK4
P05544	413	0	46230.1	23	168	0.00333302	0.5303	544.406	Serine protease inhibitor A3L OS=Rattus norvegicus OX=10116 GN=Serpina3l PE=1 SV=3
A0A0G2JXK5	413	1	46172.1	23	163	0.00323382	0.5109	537.676	Serine protease inhibitor A3N OS=Rattus norvegicus OX=10116 GN=LOC299282 PE=1 SV=1
Q5M842	458	1	50217.8	21	189	0.00338123	0.5415	535.852	IgG-2a protein OS=Rattus norvegicus OX=10116 GN=IgG-2a PE=1 SV=1
Q5BK05	458	0	49893.6	21	189	0.00338123	0.5568	534.857	LOC367586 protein OS=Rattus norvegicus OX=10116 GN=LOC367586 PE=2 SV=1
Q5BJZ2	458	0	50110.6	20	188	0.00336334	0.5415	533.426	LOC367586 protein OS=Rattus norvegicus OX=10116 GN=LOC367586 PE=1 SV=1
P20760	322	0	35145.4	19	184	0.0046821	0.7112	519.576	Ig gamma-2A chain C region OS=Rattus norvegicus OX=10116 GN=Igg-2a PE=1 SV=1
P07092	397	0	44017.3	19	163	0.00336415	0.4131	514.045	Glia-derived nexin OS=Rattus norvegicus OX=10116 GN=Serpine2 PE=1 SV=1
Q62670	147	0	15951.2	11	192	0.0107019	0.551	497.915	0 beta-2 globin OS=Rattus norvegicus OX=10116 GN=0 beta-2 globin PE=3 SV=1
A0A1B0GWS5	1350	0	150911	26	152	0.000922547	0.2889	487.592	Complement C5 (Fragment) OS=Rattus norvegicus OX=10116 GN=C5 PE=1 SV=1
D3ZBS2	887	3	98987.7	26	162	0.00149648	0.31	475.912	Inter-alpha-trypsin inhibitor heavy chain H3 OS=Rattus norvegicus OX=10116 GN=Itih3 PE=1 SV=3; Additional IDs concatenated into MaxParsimony group: Q63416; Additional IDs concatenated into MaxParsimony group: Q63416
D4A3E0	1210	27	135500	27	144	0.000975115	0.2066	467.506	Multimerin 1 OS=Rattus norvegicus OX=10116 GN=Mmrn1 PE=4 SV=1
Q63416	887	0	99017.6	23	156	0.00144105	0.31	465.758	Inter-alpha-trypsin inhibitor heavy chain H3 OS=Rattus norvegicus OX=10116 GN=Itih3 PE=2 SV=1
Q5M8A0	433	2	47842.6	23	158	0.00298984	0.515	448.452	Kng2 protein OS=Rattus norvegicus OX=10116 GN=Kng2l1 PE=2 SV=1
A0A0G2K1T8	416	0	46257.9	21	131	0.00258022	0.5865	446.803	Serine protease inhibitor A3N OS=Rattus norvegicus OX=10116 GN=LOC299282 PE=1 SV=1
P24090	352	2	37940.2	11	104	0.00242086	0.4688	410.923	Alpha-2-HS-glycoprotein OS=Rattus norvegicus OX=10116 GN=Ahsg PE=1 SV=2; Additional IDs concatenated into MaxParsimony group: Q7TP75; Additional IDs concatenated into MaxParsimony group: Q7TP75
P55314	589	18	66605.5	18	108	0.00150241	0.3345	395.471	Complement component C8 beta chain OS=Rattus norvegicus OX=10116 GN=C8b PE=2 SV=2
Q7TPK2	2102	5	237092	28	140	0.000545725	0.1227	379.859	Ac2-120 OS=Rattus norvegicus OX=10116 GN=F5 PE=2 SV=1; Additional IDs concatenated into MaxParsimony group: A0A0G2K3W2, A0A0G2JXI1; Additional IDs concatenated into MaxParsimony group: A0A0G2K3W2, A0A0G2JXI1
contaminant_KERATIN17	590	4	62405.1	22	137	0.0019026	0.2847	367.539
A0A0G2K509	591	1	62734.7	18	128	0.0017746	0.2318	362.503	Keratin, type II cytoskeletal 5 OS=Rattus norvegicus OX=10116 GN=Krt5 PE=1 SV=1
A0A0G2K4I9	622	11	69535.8	21	108	0.0014227	0.4003	344.286	Coagulation factor XI OS=Rattus norvegicus OX=10116 GN=F11 PE=1 SV=1
F7FFV2	395	0	43969.9	17	125	0.00259294	0.2886	333.469	Keratin, type II cytoskeletal 5 (Fragment) OS=Rattus norvegicus OX=10116 GN=Krt5 PE=1 SV=2
Q6P6Q2	576	0	61769.7	17	125	0.00177814	0.1979	333.469	Keratin, type II cytoskeletal 5 OS=Rattus norvegicus OX=10116 GN=Krt5 PE=1 SV=1
contaminant_KERATIN21	357	1	39176.6	16	117	0.00268532	0.3978	327.469
D3ZWD6	587	17	66212.3	17	100	0.00139586	0.3612	325.62	Complement C8 alpha chain OS=Rattus norvegicus OX=10116 GN=C8a PE=1 SV=1
P23562	927	0	103089	18	113	0.000998798	0.2416	321.308	Band 3 anion transport protein OS=Rattus norvegicus OX=10116 GN=Slc4a1 PE=1 SV=3
Q5U329	850	0	94276.9	18	113	0.00108928	0.2635	321.308	Anion exchange protein OS=Rattus norvegicus OX=10116 GN=Slc4a1 PE=1 SV=1
F8WFT7	928	0	103160	18	113	0.000997722	0.2414	321.308	Anion exchange protein OS=Rattus norvegicus OX=10116 GN=Slc4a1 PE=1 SV=1; Additional IDs concatenated into MaxParsimony group: P23562, Q5U329; Additional IDs concatenated into MaxParsimony group: P23562, Q5U329
P06765	105	9	11261.3	9	108	0.00842778	0.4476	314.573	Platelet factor 4 OS=Rattus norvegicus OX=10116 GN=Pf4 PE=1 SV=1
Q91ZE7	849	1	94234.8	17	105	0.00101335	0.2285	304.311	Anion exchange protein OS=Rattus norvegicus OX=10116 PE=2 SV=1
A0A0G2K9Y0	467	0	51541.3	15	105	0.00184226	0.3426	302.873	Immunoglobulin heavy constant mu OS=Rattus norvegicus OX=10116 GN=Ighm PE=4 SV=1
F1LPQ6	468	0	51619.3	15	105	0.00183833	0.3419	302.873	Immunoglobulin heavy constant mu OS=Rattus norvegicus OX=10116 GN=Ighm PE=4 SV=2
A0A0G2K9B1	432	0	48324.1	17	93	0.00176392	0.4722	295.242	Serine protease inhibitor A3N OS=Rattus norvegicus OX=10116 GN=LOC299282 PE=1 SV=1
P09006	418	0	46604.3	17	93	0.001823	0.488	295.242	Serine protease inhibitor A3N OS=Rattus norvegicus OX=10116 GN=Serpina3n PE=1 SV=3
A0A0H2UHI5	408	0	45434.6	17	93	0.00186768	0.5	295.242	Serine protease inhibitor A3N OS=Rattus norvegicus OX=10116 GN=Serpina3n PE=1 SV=1
A0A0G2KB85	430	0	48038	17	93	0.00177212	0.4744	295.242	Serine protease inhibitor A3N OS=Rattus norvegicus OX=10116 GN=LOC299282 PE=1 SV=1
E0A3N4	430	0	47992	17	93	0.00177212	0.4744	295.242	Serpina3n-like protein OS=Rattus norvegicus OX=10116 PE=2 SV=1
F1LN61	456	0	50333.7	13	101	0.00181483	0.3268	293.863	Immunoglobulin heavy constant mu OS=Rattus norvegicus OX=10116 GN=Ighm PE=4 SV=3
Q7TP24	980	1	107365	23	109	0.000911338	0.2551	287.199	Ba1-667 OS=Rattus norvegicus OX=10116 PE=2 SV=1; Additional IDs concatenated into MaxParsimony group: A0A0G2QC06, Q7TMC7, P12346, Q6QI47, Q64599; Additional IDs concatenated into MaxParsimony group: A0A0G2QC06, Q7TMC7, P12346, Q6QI47, Q64599
A0A0G2K3W2	1688	0	190851	21	107	0.000519386	0.1297	285.67	Coagulation factor V OS=Rattus norvegicus OX=10116 GN=F5 PE=1 SV=1
Q6IRS6	393	0	43123.7	13	92	0.00191811	0.3893	284.373	Fetub protein OS=Rattus norvegicus OX=10116 GN=Fetub PE=1 SV=1; Additional IDs concatenated into MaxParsimony group: Q9QX79; Additional IDs concatenated into MaxParsimony group: Q9QX79
Q9QX79	378	0	41517.9	13	92	0.00199423	0.4048	284.373	Fetuin-B OS=Rattus norvegicus OX=10116 GN=Fetub PE=2 SV=2
P12346	698	0	76327.6	22	107	0.00125605	0.3582	284.142	Serotransferrin OS=Rattus norvegicus OX=10116 GN=Tf PE=1 SV=3
A0A0G2QC06	979	0	107322	22	107	0.00089553	0.2554	284.142	Serotransferrin OS=Rattus norvegicus OX=10116 GN=Tf PE=1 SV=1
Q7TMC7	979	0	107325	22	107	0.00089553	0.2554	284.142	Ab2-417 OS=Rattus norvegicus OX=10116 PE=2 SV=1
P00762	246	5	25924.7	5	79	0.0026313	0.0813	274.74	Anionic trypsin-1 OS=Rattus norvegicus OX=10116 GN=Prss1 PE=1 SV=1
Q5PQU1	430	1	47715.6	15	89	0.0016959	0.3628	269.796	Kininogen 1 OS=Rattus norvegicus OX=10116 GN=Kng2 PE=2 SV=1
Q569B4	468	1	52268.8	13	90	0.00157571	0.2906	262.177	Ighg protein OS=Rattus norvegicus OX=10116 GN=Ighg PE=1 SV=1
Q3SYP8	118	0	12912.3	5	76	0.00527728	0.6356	260.234	Igh-6 protein (Fragment) OS=Rattus norvegicus OX=10116 GN=Igh-6 PE=2 SV=1
Q4FZU2	552	0	59194.7	7	90	0.00133593	0.1286	259.391	Keratin, type II cytoskeletal 6A OS=Rattus norvegicus OX=10116 GN=Krt6a PE=1 SV=1
Q4VBH1	467	0	51600.2	12	89	0.00156154	0.2912	259.221	Ighg protein OS=Rattus norvegicus OX=10116 GN=Ighg PE=1 SV=1
P01048	430	0	47726.6	14	84	0.00160063	0.3256	255.476	T-kininogen 1 OS=Rattus norvegicus OX=10116 GN=Map1 PE=1 SV=2
P14423	146	0	16264.8	7	83	0.00465805	0.4041	254.362	Phospholipase A2, membrane associated OS=Rattus norvegicus OX=10116 GN=Pla2g2a PE=1 SV=2
F1LM19	352	1	38304.6	10	77	0.00179237	0.3608	251.135	Uncharacterized protein OS=Rattus norvegicus OX=10116 PE=1 SV=3
P20759	326	0	35904.7	11	85	0.00213639	0.3589	245.371	Ig gamma-1 chain C region OS=Rattus norvegicus OX=10116 PE=1 SV=1
A0A0G2JST3	625	0	64699.1	8	87	0.00114056	0.0864	245.076	Keratin, type II cytoskeletal 1 OS=Rattus norvegicus OX=10116 GN=Krt1 PE=1 SV=1
Q6IMF3	625	0	64773.1	8	87	0.00114056	0.0864	245.076	Keratin, type II cytoskeletal 1 OS=Rattus norvegicus OX=10116 GN=Krt1 PE=2 SV=1
contaminant_KERATIN18	562	1	59767.2	12	84	0.00122468	0.2224	244.788
A0A0G2K477	466	0	51086.3	13	90	0.00158247	0.2618	243.18	Immunoglobulin heavy constant mu OS=Rattus norvegicus OX=10116 GN=Ighm PE=4 SV=1
F1LRA5	1060	2	115725	14	89	0.00068796	0.1302	241.806	Proteoglycan 4 OS=Rattus norvegicus OX=10116 GN=Prg4 PE=1 SV=2; Additional IDs concatenated into MaxParsimony group: B0BNA0; Additional IDs concatenated into MaxParsimony group: B0BNA0
Q63581	430	0	47569.5	12	73	0.00139102	0.2907	234.208	Uncharacterized protein OS=Rattus norvegicus OX=10116 PE=4 SV=1
A0A0G2JU99	203	2	22881.3	7	66	0.00266395	0.2266	232.336	Selenoprotein P OS=Rattus norvegicus OX=10116 GN=Selenop PE=1 SV=1; Additional IDs concatenated into MaxParsimony group: P25236; Additional IDs concatenated into MaxParsimony group: P25236
Q68FT8	491	1	54840	19	90	0.0015019	0.4358	232.03	RCG33981, isoform CRA_a OS=Rattus norvegicus OX=10116 GN=Serpinf2 PE=2 SV=1; Additional IDs concatenated into MaxParsimony group: F7FHF3; Additional IDs concatenated into MaxParsimony group: F7FHF3
F7FHF3	554	0	62233.7	18	89	0.00131631	0.3863	230.158	Serpin family F member 2 OS=Rattus norvegicus OX=10116 GN=Serpinf2 PE=1 SV=1
Q6DQ97	146	0	16280.9	7	68	0.00381623	0.4041	229.37	Phospholipase A(2) (Fragment) OS=Rattus norvegicus OX=10116 PE=2 SV=1; Additional IDs concatenated into MaxParsimony group: Q91Y34, B6VNU2, B6VNU1; Additional IDs concatenated into MaxParsimony group: Q91Y34, B6VNU2, B6VNU1
Q63313	481	0	53548.3	14	93	0.00158422	0.3493	228.933	Lipopolysaccharide-binding protein OS=Rattus norvegicus OX=10116 GN=Lbp PE=2 SV=1; Additional IDs concatenated into MaxParsimony group: Q3MID7
Q3MID7	481	0	53446.3	14	93	0.00158422	0.3493	228.933	Lipopolysaccharide-binding protein OS=Rattus norvegicus OX=10116 GN=Lbp PE=1 SV=1; Additional IDs concatenated into MaxParsimony group: Q63313
B0BNA0	445	0	49581.7	12	79	0.00145461	0.2742	226.513	Prg4 protein (Fragment) OS=Rattus norvegicus OX=10116 GN=Prg4 PE=2 SV=1
A0A0G2JXI1	1833	0	206196	15	73	0.000326317	0.0895	220.397	Coagulation factor V OS=Rattus norvegicus OX=10116 GN=F5 PE=1 SV=1
Q6TUF8	556	3	62930.8	13	66	0.000972631	0.2464	219.155	Coagulation factor XI OS=Rattus norvegicus OX=10116 GN=F11 PE=1 SV=1
A0A096MIW4	79	0	8864.6	3	51	0.00528959	0.3165	216.979	Serpin family C member 1 (Fragment) OS=Rattus norvegicus OX=10116 GN=Serpinc1 PE=1 SV=1
P20762	329	12	36530.4	14	84	0.002092	0.4438	214.965	Ig gamma-2C chain C region OS=Rattus norvegicus OX=10116 PE=2 SV=1
P20059	460	15	51300.3	15	89	0.0015853	0.3478	211.479	Hemopexin OS=Rattus norvegicus OX=10116 GN=Hpx PE=1 SV=3
Q62894	562	12	63190	12	78	0.0011372	0.2331	209.134	Extracellular matrix protein 1 OS=Rattus norvegicus OX=10116 GN=Ecm1 PE=1 SV=2
Q7TP75	553	0	61426.6	8	65	0.000963091	0.1935	206.333	Aa2-066 OS=Rattus norvegicus OX=10116 PE=1 SV=1
M0R5R0	675	4	74545.6	14	91	0.00110463	0.1348	203.837	Protein S (Alpha), isoform CRA_b OS=Rattus norvegicus OX=10116 GN=Pros1 PE=1 SV=1; Additional IDs concatenated into MaxParsimony group: P53813, Q62628; Additional IDs concatenated into MaxParsimony group: P53813, Q62628
P25236	385	0	43047.8	5	54	0.00114924	0.1195	203.335	Selenoprotein P OS=Rattus norvegicus OX=10116 GN=Selenop PE=1 SV=2
B2RYM3	904	19	100508	19	69	0.000625402	0.3075	199.081	Inter-alpha trypsin inhibitor, heavy chain 1 OS=Rattus norvegicus OX=10116 GN=Itih1 PE=1 SV=1
P53813	675	0	74560.6	10	87	0.00105607	0.1348	197.257	Vitamin K-dependent protein S OS=Rattus norvegicus OX=10116 GN=Pros1 PE=2 SV=1
contaminant_KERATIN05	471	3	51481.4	18	79	0.00137431	0.397	190.838
A0A0H2UI19	603	1	66656.1	12	73	0.000991938	0.2123	187.581	Coagulation factor XII OS=Rattus norvegicus OX=10116 GN=F12 PE=1 SV=1; Additional IDs concatenated into MaxParsimony group: D3ZTE0; Additional IDs concatenated into MaxParsimony group: D3ZTE0
Q99ME0	111	9	12133.6	9	62	0.00457665	0.5315	184.842	CXC chemokine RTCK1 OS=Rattus norvegicus OX=10116 GN=Ppbp PE=1 SV=1
D3ZTE0	595	0	65782.7	11	71	0.000977733	0.2151	183.559	Coagulation factor XII OS=Rattus norvegicus OX=10116 GN=F12 PE=2 SV=1
F7EUK4	432	0	47879.5	13	72	0.00136561	0.2824	182.353	Kininogen-1 OS=Rattus norvegicus OX=10116 GN=Kng1 PE=1 SV=2
P08932	430	0	47655.4	13	72	0.00137196	0.2837	182.353	T-kininogen 2 OS=Rattus norvegicus OX=10116 PE=1 SV=2
A0A0G2JW69	484	0	52831.8	6	66	0.00111732	0.0661	181.718	Keratin 79 (Fragment) OS=Rattus norvegicus OX=10116 GN=Krt79 PE=1 SV=1
P55159	355	10	39315.1	10	58	0.00133869	0.3746	181.073	Serum paraoxonase/arylesterase 1 OS=Rattus norvegicus OX=10116 GN=Pon1 PE=1 SV=3
A0A0H2UHH5	573	0	62112.1	6	63	0.000900876	0.103	180.12	Keratin, type II cytoskeletal 75 OS=Rattus norvegicus OX=10116 GN=Krt75 PE=1 SV=1
Q6IG05	542	0	58972.6	6	63	0.000952402	0.1089	180.12	Keratin, type II cytoskeletal 75 OS=Rattus norvegicus OX=10116 GN=Krt75 PE=3 SV=2
A0A0G2K8K3	511	0	57968.4	11	70	0.00112242	0.2329	178.085	Heparin cofactor 2 OS=Rattus norvegicus OX=10116 GN=Serpind1 PE=1 SV=1; Additional IDs concatenated into MaxParsimony group: Q64268; Additional IDs concatenated into MaxParsimony group: Q64268
Q64268	479	0	54498.9	11	70	0.00119741	0.2484	178.085	Heparin cofactor 2 OS=Rattus norvegicus OX=10116 GN=Serpind1 PE=1 SV=1
A0A0G2K3K2	378	0	42040.9	14	68	0.00147399	0.4471	177.992	Actin, cytoplasmic 1 OS=Rattus norvegicus OX=10116 GN=Actb PE=1 SV=1; Additional IDs concatenated into MaxParsimony group: P63259, P60711, A1Z0K8, P68035, P62738, B0BMT0, A0A0G2K4M6, P63269, A0A068F1Y2, Q99NC6, D3ZRN3, Q9JLX9, Q63030; Additional IDs concatenated into MaxParsimony group: P60711, P63259, A1Z0K8, P68136, P62738, B0BMT0, P63269, A0A0G2K4M6, A0A068F1Y2, Q99NC6, D3ZRN3, Q9JLX9, Q63030
P60711	375	0	41691.7	14	68	0.00148579	0.4507	177.992	Actin, cytoplasmic 1 OS=Rattus norvegicus OX=10116 GN=Actb PE=1 SV=1
P63259	375	0	41747.8	14	68	0.00148579	0.4507	177.992	Actin, cytoplasmic 2 OS=Rattus norvegicus OX=10116 GN=Actg1 PE=1 SV=1
H6X2W4	230	0	25401.7	5	63	0.00224436	0.3261	176.718	Pentaxin OS=Rattus norvegicus OX=10116 GN=crp PE=3 SV=1; Additional IDs concatenated into MaxParsimony group: H6X2X0, H6X2W3, H6X2W1, P48199, H6X2W5, H6X2V7, H6X2W7, H6X2V9, A0A0G2K8V5, Q7TMA9, H6X2W6, H6X2W2, H6X2V2, H6X2V3, H6X2V8, H6X2W0, H6X2V4
H6X2W1	230	0	25408.6	5	63	0.00224436	0.3261	176.718	Pentaxin OS=Rattus norvegicus OX=10116 GN=crp PE=3 SV=1; Additional IDs concatenated into MaxParsimony group: H6X2W7, H6X2V7, H6X2W5, H6X2W3, H6X2X0, H6X2W4, H6X2V9, P48199, A0A0G2K8V5, Q7TMA9, H6X2W0, H6X2V8, H6X2V3, H6X2W2, H6X2W6, H6X2V4, H6X2V2
H6X2V9	230	0	25445.8	5	63	0.00224436	0.3261	176.718	Pentaxin OS=Rattus norvegicus OX=10116 GN=crp PE=3 SV=1
H6X2W7	230	0	25407.7	5	63	0.00224436	0.3261	176.718	Pentaxin OS=Rattus norvegicus OX=10116 GN=crp PE=3 SV=1
P48199	230	0	25433.7	5	63	0.00224436	0.3261	176.718	C-reactive protein OS=Rattus norvegicus OX=10116 GN=Crp PE=1 SV=1
H6X2W3	230	0	25417.7	5	63	0.00224436	0.3261	176.718	Pentaxin OS=Rattus norvegicus OX=10116 GN=crp PE=3 SV=1
H6X2X0	230	0	25407.7	5	63	0.00224436	0.3261	176.718	Pentaxin OS=Rattus norvegicus OX=10116 GN=crp PE=3 SV=1
H6X2V7	230	0	25431.7	5	63	0.00224436	0.3261	176.718	Pentaxin OS=Rattus norvegicus OX=10116 GN=crp PE=3 SV=1
H6X2W5	230	0	25433.7	5	63	0.00224436	0.3261	176.718	Pentaxin OS=Rattus norvegicus OX=10116 GN=Crp PE=3 SV=1
Q80ZA3	418	16	46418.2	16	62	0.00121533	0.378	175.909	Alpha-2 antiplasmin OS=Rattus norvegicus OX=10116 GN=Serpinf1 PE=1 SV=1
Q811M5	934	2	105027	11	58	0.000508815	0.1574	175.703	Complement component C6 OS=Rattus norvegicus OX=10116 GN=C6 PE=2 SV=1
A0A0G2JVQ5	635	1	70470.4	13	67	0.00086453	0.1795	174.273	Kininogen-1 OS=Rattus norvegicus OX=10116 GN=Kng1 PE=1 SV=1
A0A0G2KA54	635	0	70381.3	12	66	0.000851626	0.1795	171.366	Kininogen-1 OS=Rattus norvegicus OX=10116 GN=Kng1 PE=1 SV=1
A0A0G2KAY3	398	0	44221	12	66	0.00135875	0.2864	171.366	Kininogen-1 OS=Rattus norvegicus OX=10116 GN=Kng1 PE=1 SV=1
Q63223	51	0	5575.9	6	64	0.0102823	0.7255	168.238	Rat hemoglobin beta-chain (Fragment) OS=Rattus norvegicus OX=10116 PE=2 SV=1
D3ZFH5	826	9	92293.3	14	59	0.000585263	0.2215	166.089	Inter-alpha-trypsin inhibitor heavy chain 2 OS=Rattus norvegicus OX=10116 GN=Itih2 PE=1 SV=3; Additional IDs concatenated into MaxParsimony group: Q498S9; Additional IDs concatenated into MaxParsimony group: Q498S9
F1M7F7	931	2	104237	11	54	0.000475251	0.1332	162.142	Complement component C6 OS=Rattus norvegicus OX=10116 GN=C6 PE=1 SV=3
contaminant_KERATIN08	469	4	50449.7	12	69	0.00120547	0.2516	162.078
H6X2W2	230	0	25409.6	4	57	0.00203061	0.2348	155.763	Pentaxin OS=Rattus norvegicus OX=10116 GN=crp PE=3 SV=1
P09005	214	0	24184.7	9	57	0.00218243	0.2617	149.731	Serine protease inhibitor 2.1 (Fragment) OS=Rattus norvegicus OX=10116 PE=2 SV=1
Q91YB6	1236	0	140234	13	58	0.000384493	0.1367	149.274	Complement inhibitory factor H OS=Rattus norvegicus OX=10116 GN=Cfh PE=2 SV=1; Additional IDs concatenated into MaxParsimony group: F1M983, Q5XJW6, A0A0G2K975, G3V7P5, Q5FVP9; Additional IDs concatenated into MaxParsimony group: F1M983, Q5XJW6, A0A0G2K975, G3V7P5, Q5FVP9
H6X2V4	230	0	25467.7	4	54	0.00192373	0.2304	147.317	Pentaxin OS=Rattus norvegicus OX=10116 GN=crp PE=3 SV=1
H6X2W6	230	0	25429.7	4	54	0.00192373	0.2304	147.317	Pentaxin OS=Rattus norvegicus OX=10116 GN=crp PE=3 SV=1
A0A0G2K8V5	1017	0	116413	4	54	0.000435063	0.0521	147.317	C-reactive protein OS=Rattus norvegicus OX=10116 GN=Crp PE=1 SV=1
H6X2V2	230	0	25341.7	4	54	0.00192373	0.2304	147.317	Pentaxin OS=Rattus norvegicus OX=10116 GN=crp PE=3 SV=1
H6X2V8	230	0	25463.7	4	54	0.00192373	0.2304	147.317	Pentaxin OS=Rattus norvegicus OX=10116 GN=crp PE=3 SV=1
Q7TMA9	1015	0	116369	4	54	0.00043592	0.0522	147.317	Aa1249 OS=Rattus norvegicus OX=10116 PE=2 SV=1
Q63280	79	0	9371.6	6	51	0.00528959	0.4304	143.839	Keratin K5 (Fragment) OS=Rattus norvegicus OX=10116 GN=keratin K5 PE=3 SV=1
Q6PAH0	312	1	35723.3	10	48	0.00126057	0.3494	143.506	Apolipoprotein E OS=Rattus norvegicus OX=10116 GN=Apoe PE=2 SV=1; Additional IDs concatenated into MaxParsimony group: A0A0G2K151, Q65ZS7, P02650; Additional IDs concatenated into MaxParsimony group: A0A0G2K151, Q65ZS7, P02650
H6X2V3	230	0	25447.7	4	47	0.00167436	0.2826	142.893	Pentaxin OS=Rattus norvegicus OX=10116 GN=crp PE=3 SV=1
H6X2W0	230	0	25251.6	4	47	0.00167436	0.2826	142.893	Pentaxin OS=Rattus norvegicus OX=10116 GN=crp PE=3 SV=1
Q6IG01	519	0	57201.6	5	50	0.000789372	0.0424	142.284	Keratin, type II cytoskeletal 1b OS=Rattus norvegicus OX=10116 GN=Krt77 PE=3 SV=1
A0A0G2JZQ9	579	0	62028.8	5	50	0.000707571	0.038	142.284	Keratin, type II cytoskeletal 1b OS=Rattus norvegicus OX=10116 GN=Krt77 PE=3 SV=1
A0A0G2K151	359	0	41155.8	9	46	0.00104989	0.3036	140.14	Apolipoprotein E OS=Rattus norvegicus OX=10116 GN=Apoe PE=1 SV=1
Q65ZS7	336	0	38283.7	9	46	0.00112175	0.3244	140.14	Rat apolipoprotein E protein OS=Rattus norvegicus OX=10116 PE=3 SV=1
P02650	312	0	35713.3	9	46	0.00120804	0.3494	140.14	Apolipoprotein E OS=Rattus norvegicus OX=10116 GN=Apoe PE=1 SV=2
A0A0G2JWX4	684	0	69045.2	8	53	0.00063489	0.0892	139.838	Keratin, type II cytoskeletal 2 epidermal OS=Rattus norvegicus OX=10116 GN=Krt2 PE=1 SV=1
Q6IG02	685	0	69067.2	8	53	0.000633963	0.0891	139.838	Keratin, type II cytoskeletal 2 epidermal OS=Rattus norvegicus OX=10116 GN=Krt2 PE=3 SV=1
A1Z0K8	283	0	31708.9	10	51	0.0014766	0.4382	139.029	Beta-actin (Fragment) OS=Rattus norvegicus OX=10116 PE=2 SV=1
G3V9R2	1235	1	140121	13	54	0.000358266	0.1255	138.758	Complement factor H OS=Rattus norvegicus OX=10116 GN=Cfh PE=1 SV=1
Q64240	349	4	38808	4	40	0.000939103	0.1461	138.118	Protein AMBP OS=Rattus norvegicus OX=10116 GN=Ambp PE=1 SV=1
A0A0G2JZ73	415	1	46586.8	15	54	0.00106617	0.4313	137.872	Alpha-1-antiproteinase OS=Rattus norvegicus OX=10116 GN=Serpina1 PE=1 SV=1; Additional IDs concatenated into MaxParsimony group: P17475, A0A0G2JY31; Additional IDs concatenated into MaxParsimony group: P17475, A0A0G2JY31
Q62628	346	0	38055.4	8	62	0.00146823	0.2168	137.081	Protein S (Fragment) OS=Rattus norvegicus OX=10116 PE=2 SV=1
P97535	456	10	50151.7	10	48	0.000862492	0.2544	136.387	Phospholipase A1 member A OS=Rattus norvegicus OX=10116 GN=Pla1a PE=1 SV=1
F1M983	1234	0	139898	12	52	0.000345277	0.1256	134.951	Complement factor H OS=Rattus norvegicus OX=10116 GN=Cfh PE=1 SV=1
P02651	391	1	44410.7	11	51	0.00106874	0.3836	134.386	Apolipoprotein A-IV OS=Rattus norvegicus OX=10116 GN=Apoa4 PE=1 SV=2
A0A0G2K7X7	846	12	93585.5	13	52	0.00050363	0.1702	134.209	Complement C7 OS=Rattus norvegicus OX=10116 GN=C7 PE=1 SV=1; Additional IDs concatenated into MaxParsimony group: Q9ERF0; Additional IDs concatenated into MaxParsimony group: Q9ERF0
A0A0G2JY31	411	0	46074.5	14	51	0.00101673	0.4355	131.619	Alpha-1-antiproteinase OS=Rattus norvegicus OX=10116 GN=Serpina1 PE=1 SV=1
P17475	411	0	46088.5	14	51	0.00101673	0.4355	131.619	Alpha-1-antiproteinase OS=Rattus norvegicus OX=10116 GN=Serpina1 PE=1 SV=2
C0M4B0	517	10	58234.2	10	49	0.000776577	0.2901	129.088	Matrix metallopeptidase 19 OS=Rattus norvegicus OX=10116 GN=Mmp19 PE=2 SV=1
Q63910	142	5	15497	7	54	0.00311591	0.4296	127.214	Alpha globin OS=Rattus norvegicus OX=10116 GN=Hba-a3 PE=1 SV=2
D4A2G6	1172	0	129626	3	43	0.000300621	0.0196	124.943	Thrombospondin 2 OS=Rattus norvegicus OX=10116 GN=Thbs2 PE=4 SV=2
P04797	333	0	35787.2	7	36	0.000885803	0.2432	122.205	Glyceraldehyde-3-phosphate dehydrogenase OS=Rattus norvegicus OX=10116 GN=Gapdh PE=1 SV=3; Additional IDs concatenated into MaxParsimony group: M0R590, D3ZGY4, M0R660, Q0QEU1, E9PTN6, E9PTV9, F1LUV3, F1M4G6, Q498M9, A0A0G2K8S2, D3ZWV2, D3ZME3, P97617, A0A0G2JYY8, F1M2N4, F1LUI2, D3ZEN2, F1M3U4, C8CHS7
M0R590	333	0	35773.1	7	36	0.000885803	0.2432	122.205	Glyceraldehyde-3-phosphate dehydrogenase OS=Rattus norvegicus OX=10116 GN=LOC108351137 PE=3 SV=1; Additional IDs concatenated into MaxParsimony group: P04797, D3ZGY4, M0R660, Q0QEU1, E9PTN6, E9PTV9, F1LUV3, F1M4G6, A0A0G2K8S2, Q498M9, D3ZWV2, D3ZME3, P97617, A0A0G2JYY8, F1M2N4, F1LUI2, D3ZEN2, F1M3U4, C8CHS7
Q6IFV1	485	0	52632.9	9	51	0.000861603	0.1959	121.671	Keratin, type I cytoskeletal 14 OS=Rattus norvegicus OX=10116 GN=Krt14 PE=2 SV=1
A0A0G2JVX7	392	1	44316.7	11	47	0.000982405	0.3469	119.915	Apolipoprotein A-IV OS=Rattus norvegicus OX=10116 GN=Apoa4 PE=1 SV=1
D4A8G5	685	10	74687.8	10	32	0.00038277	0.2307	119.702	Transforming growth factor, beta-induced OS=Rattus norvegicus OX=10116 GN=Tgfbi PE=1 SV=2
Q6IFU8	433	0	48075	11	53	0.00100292	0.2356	118.61	Keratin, type I cytoskeletal 17 OS=Rattus norvegicus OX=10116 GN=Krt17 PE=1 SV=1
O09016	126	2	14065.8	6	39	0.00253614	0.3175	118.419	K-kininogen (Fragment) OS=Rattus norvegicus OX=10116 GN=Kngk PE=4 SV=1
D3ZGY4	333	0	35782.1	6	33	0.000811986	0.2192	117.388	Glyceraldehyde-3-phosphate dehydrogenase OS=Rattus norvegicus OX=10116 PE=1 SV=1
A0A0G2JVA8	537	0	58042.1	4	40	0.00061033	0.0726	117.148	Type II keratin Kb15 OS=Rattus norvegicus OX=10116 GN=Kb15 PE=3 SV=1
G3V908	532	0	57555.8	4	40	0.000616066	0.0733	117.148	Type II keratin Kb15 OS=Rattus norvegicus OX=10116 GN=Kb15 PE=2 SV=2
A0A0G2K9Q9	447	0	49525.5	10	52	0.00095318	0.1991	116.49	Keratin, type I cytoskeletal 17 OS=Rattus norvegicus OX=10116 GN=Krt17 PE=1 SV=1
contaminant_KERATIN12	431	0	47927	10	51	0.000969554	0.2111	114.817
M0R660	333	0	35742.1	5	32	0.00078738	0.1832	113.392	Glyceraldehyde-3-phosphate dehydrogenase OS=Rattus norvegicus OX=10116 PE=1 SV=1
A0A1B0GWQ4	291	0	33440	6	37	0.00104181	0.3402	108.263	Complement C5 (Fragment) OS=Rattus norvegicus OX=10116 GN=C5 PE=1 SV=1
A0A0G2JUG1	538	0	57405.7	3	36	0.000548276	0.0558	108.062	IF rod domain-containing protein OS=Rattus norvegicus OX=10116 PE=3 SV=1
P04639	259	8	30025.2	8	31	0.00098071	0.3629	106.969	Apolipoprotein A-I OS=Rattus norvegicus OX=10116 GN=Apoa1 PE=1 SV=2
O70211	603	0	66864.7	9	36	0.000489175	0.2172	106.88	Insulin-like growth factor binding protein complex acid-labile subunit OS=Rattus norvegicus OX=10116 PE=4 SV=1; Additional IDs concatenated into MaxParsimony group: F1LRE2, P35859; Additional IDs concatenated into MaxParsimony group: F1LRE2, P35859
B1WC21	685	4	75312.1	11	40	0.000478463	0.1343	106.369	Fibulin-1 OS=Rattus norvegicus OX=10116 GN=Fbln1 PE=1 SV=1
contaminant_KERATIN14	638	0	65812.1	6	41	0.000526553	0.058	103.718
Q5XJW6	689	0	78609.9	8	40	0.000475685	0.1277	103.201	Cfh protein OS=Rattus norvegicus OX=10116 GN=Cfh PE=1 SV=1
P35859	603	0	66751.6	8	33	0.00044841	0.2023	101.324	Insulin-like growth factor-binding protein complex acid labile subunit OS=Rattus norvegicus OX=10116 GN=Igfals PE=1 SV=1
Q7TMC3	830	2	92763.7	7	42	0.00041462	0.0602	99.9481	Hermansky-Pudlak syndrome 5 protein homolog OS=Rattus norvegicus OX=10116 GN=Saa4 PE=1 SV=1; Additional IDs concatenated into MaxParsimony group: Q5M878; Additional IDs concatenated into MaxParsimony group: Q5M878
contaminant_KERATIN15	629	0	64453.6	5	39	0.000508034	0.0461	99.8995
D3ZQ25	705	2	78001.4	9	37	0.000430023	0.1376	99.7053	Fibulin-1 OS=Rattus norvegicus OX=10116 GN=Fbln1 PE=1 SV=1
Q62975	436	7	50193.8	7	34	0.000638957	0.2064	99.2004	Protein Z-dependent protease inhibitor OS=Rattus norvegicus OX=10116 GN=Serpina10 PE=2 SV=2
Q0QEU1	238	0	25501.2	5	27	0.000929535	0.2479	97.3505	Glyceraldehyde-3-phosphate dehydrogenase (Fragment) OS=Rattus norvegicus OX=10116 GN=GAPDH PE=2 SV=1
Q6IFV3	447	0	48822.1	7	48	0.000879858	0.1029	96.217	Keratin, type I cytoskeletal 15 OS=Rattus norvegicus OX=10116 GN=Krt15 PE=1 SV=1
Q91Y34	146	0	16276.8	4	35	0.00196424	0.226	94.8852	Phospholipase A(2) (Fragment) OS=Rattus norvegicus OX=10116 PE=2 SV=1
P20761	333	8	36456.2	9	36	0.000885803	0.3514	94.8128	Ig gamma-2B chain C region OS=Rattus norvegicus OX=10116 GN=Igh-1a PE=1 SV=1
Q5I0M1	345	0	38413.7	7	36	0.000854992	0.2232	93.8624	Apolipoprotein H OS=Rattus norvegicus OX=10116 GN=Apoh PE=1 SV=1; Additional IDs concatenated into MaxParsimony group: P26644, Q3T940; Additional IDs concatenated into MaxParsimony group: P26644, Q3T940
Q10758	483	0	53967.3	5	38	0.000644637	0.0393	91.7663	Keratin, type II cytoskeletal 8 OS=Rattus norvegicus OX=10116 GN=Krt8 PE=1 SV=3
Q5M878	130	0	14945.4	5	37	0.00233205	0.3846	91.0747	Serum amyloid A protein OS=Rattus norvegicus OX=10116 GN=Saa4 PE=1 SV=1
P68035	377	0	41973.9	8	36	0.00078242	0.2467	88.2387	Actin, alpha cardiac muscle 1 OS=Rattus norvegicus OX=10116 GN=Actc1 PE=2 SV=1
P68136	377	0	42005.8	8	36	0.00078242	0.2467	88.2387	Actin, alpha skeletal muscle OS=Rattus norvegicus OX=10116 GN=Acta1 PE=1 SV=1
G3V852	2541	8	269486	12	33	0.000106411	0.0488	86.6303	RCG55135, isoform CRA_b OS=Rattus norvegicus OX=10116 GN=Tln1 PE=1 SV=1; Additional IDs concatenated into MaxParsimony group: Q498D4, D3ZA84, D4A3B0; Additional IDs concatenated into MaxParsimony group: Q498D4, D3ZA84, D4A3B0
F1LRE2	603	0	66838.7	8	30	0.000407646	0.1841	84.8595	Insulin-like growth factor binding protein, acid labile subunit, isoform CRA_b OS=Rattus norvegicus OX=10116 GN=Igfals PE=1 SV=2
contaminant_KERATIN07	473	1	50864.8	7	39	0.000675589	0.1395	84.4357
A0A0G2K6P7	526	0	56505.4	4	30	0.00046732	0.0532	79.3292	Keratin, type II cytoskeletal 4 OS=Rattus norvegicus OX=10116 GN=Krt4 PE=3 SV=1
Q6IG00	536	0	57613	4	30	0.000458601	0.0522	79.3292	Keratin, type II cytoskeletal 4 OS=Rattus norvegicus OX=10116 GN=Krt4 PE=3 SV=1
P63269	376	0	41831.8	7	32	0.000697334	0.2181	79.015	Actin, gamma-enteric smooth muscle OS=Rattus norvegicus OX=10116 GN=Actg2 PE=2 SV=1
A0A0G2K4M6	376	0	41879.7	7	32	0.000697334	0.2181	79.015	Actin, aortic smooth muscle OS=Rattus norvegicus OX=10116 GN=Acta2 PE=3 SV=1
P62738	377	0	41963.8	7	32	0.000695485	0.2175	79.015	Actin, aortic smooth muscle OS=Rattus norvegicus OX=10116 GN=Acta2 PE=2 SV=1
B0BMT0	377	0	41963.8	7	32	0.000695485	0.2175	79.015	RCG47746, isoform CRA_a OS=Rattus norvegicus OX=10116 GN=Acta2 PE=2 SV=1
O88752	147	0	16076.5	2	36	0.00200661	0.068	77.8942	Epsilon 1 globin OS=Rattus norvegicus OX=10116 GN=Hbe1 PE=1 SV=1
contaminant_KERATIN20	483	0	53697.1	4	32	0.000542852	0.0207	77.474
D4ACR1	121	2	13686.9	3	24	0.00162519	0.314	76.5308	Ig-like domain-containing protein OS=Rattus norvegicus OX=10116 PE=1 SV=2; Additional IDs concatenated into MaxParsimony group: A0A0G2K828; Additional IDs concatenated into MaxParsimony group: A0A0G2K828
Q63282	26	0	3087.5	1	27	0.00850882	0.3846	76.4706	Keratin K6 (Fragment) OS=Rattus norvegicus OX=10116 GN=keratin K6 PE=4 SV=1
Q91WX0	699	3	78240.1	10	34	0.000398548	0.1817	74.4597	Complement factor H-related protein OS=Rattus norvegicus OX=10116 PE=2 SV=2
D4A1T6	660	1	75242.5	7	23	0.000285537	0.1258	73.1851	Complement C1r OS=Rattus norvegicus OX=10116 GN=C1r PE=1 SV=3; Additional IDs concatenated into MaxParsimony group: B5DEH7, Q4G030; Additional IDs concatenated into MaxParsimony group: B5DEH7, Q4G030
A0A068F1Y2	186	0	20408.1	5	28	0.00123346	0.328	72.2718	Beta-actin (Fragment) OS=Rattus norvegicus OX=10116 GN=Actb PE=2 SV=1
Q62970	576	0	66702.5	9	28	0.000398304	0.1753	71.7983	Apolipoprotein B (Fragment) OS=Rattus norvegicus OX=10116 GN=apoB PE=4 SV=1
A0A5C5	258	1	28588.8	8	33	0.00104803	0.2132	71.7201	C4b-binding protein beta chain OS=Rattus norvegicus OX=10116 GN=C4bpb PE=1 SV=1; Additional IDs concatenated into MaxParsimony group: Q63515; Additional IDs concatenated into MaxParsimony group: Q63515
F1LZ11	124	3	14039.7	3	24	0.00158587	0.2984	71.712	Ig-like domain-containing protein OS=Rattus norvegicus OX=10116 PE=1 SV=1
Q6IFU7	452	0	50163.9	7	31	0.000561956	0.1748	70.3241	Keratin, type I cytoskeletal 42 OS=Rattus norvegicus OX=10116 GN=Krt42 PE=3 SV=1
contaminant_KERATIN06	456	0	49119	5	35	0.000628901	0.0789	70.1317
A0A0G2JXJ9	442	1	47363.8	6	34	0.000630283	0.0973	69.6506	Keratin, type I cytoskeletal 14 OS=Rattus norvegicus OX=10116 GN=Krt14 PE=1 SV=1
B5DEH7	707	0	80355.2	6	21	0.000243377	0.1174	69.5736	C1r protein OS=Rattus norvegicus OX=10116 GN=C1r PE=1 SV=1
Q63515	258	0	28604.8	7	32	0.00101627	0.2132	69.1737	C4b-binding protein beta chain OS=Rattus norvegicus OX=10116 GN=C4bpb PE=2 SV=1
Q6IG03	553	0	60331.4	2	20	0.000296336	0.0362	68.6288	Keratin, type II cytoskeletal 73 OS=Rattus norvegicus OX=10116 GN=Krt73 PE=1 SV=1
A0A0G2JXH6	539	0	58726.6	2	20	0.000304033	0.0371	68.6288	Keratin, type II cytoskeletal 73 OS=Rattus norvegicus OX=10116 GN=Krt73 PE=1 SV=1
G3V8R3	142	0	16049.2	2	31	0.00178876	0.0634	68.044	Globin e1 OS=Rattus norvegicus OX=10116 GN=Hbz PE=3 SV=1
Q6IFZ5	581	0	61702.5	3	25	0.000352568	0.0482	64.14	Keratin 76 OS=Rattus norvegicus OX=10116 GN=Krt76 PE=2 SV=1
Q5WRG2	145	2	16051	5	23	0.00129969	0.331	63.8473	Angiogenin OS=Rattus norvegicus OX=10116 GN=Ang PE=1 SV=1; Additional IDs concatenated into MaxParsimony group: Q5GAM6, Q5GAM5; Additional IDs concatenated into MaxParsimony group: Q5GAM6, Q5GAM5
M0RA79	99	2	10934.4	3	22	0.00182082	0.3636	62.3406	Ig-like domain-containing protein OS=Rattus norvegicus OX=10116 PE=1 SV=1
F1M8F5	410	0	46310	5	20	0.000399692	0.1171	61.8063	Similar to BC049975 protein OS=Rattus norvegicus OX=10116 GN=LOC100909605 PE=3 SV=3
Q99NC6	134	0	14955.4	5	22	0.00134523	0.5075	60.7326	Beta-actin FE-3 (Fragment) OS=Rattus norvegicus OX=10116 PE=2 SV=1
F1LR92	419	0	46793.5	5	23	0.000449772	0.1193	60.3326	Serine protease inhibitor A3M OS=Rattus norvegicus OX=10116 GN=Serpina3m PE=1 SV=3
Q63556	412	0	46048.1	5	23	0.000457414	0.1214	60.3326	Serine protease inhibitor A3M (Fragment) OS=Rattus norvegicus OX=10116 GN=Serpina3m PE=2 SV=1
contaminant_KERATIN10	400	0	44061.1	5	32	0.000655494	0.09	60.1147
Q63279	403	0	44590.6	5	32	0.000650615	0.0893	60.1147	Keratin, type I cytoskeletal 19 OS=Rattus norvegicus OX=10116 GN=Krt19 PE=1 SV=2
contaminant_NRL_1MCOH	428	5	46804.8	5	25	0.000478603	0.1379	59.6286	Immunoglobulin g1 (igg1) (mcg) with a hinge deletion, chain H...
Q9Z1G8	148	0	15971.9	2	17	0.000941166	0.2635	59.0111	Fibronectin (Fragment) OS=Rattus norvegicus OX=10116 PE=4 SV=1
Q63429	810	0	91013	4	24	0.000242776	0.0531	57.8247	Polyubiquitin-C OS=Rattus norvegicus OX=10116 GN=Ubc PE=1 SV=1; Additional IDs concatenated into MaxParsimony group: F1LML2, Q5FWT0, P0CG51, P62982, Q6PED0, P62986, Q6P7R7, Q63654, contaminant_UBIQUITIN08, F1LU69, F1M927, D4A0J6
Q6P7R7	128	0	14700.9	4	24	0.00153631	0.3359	57.8247	Ubiquitin A-52 residue ribosomal protein fusion product 1 OS=Rattus norvegicus OX=10116 GN=Uba52 PE=2 SV=1
P62982	156	0	17921.5	4	24	0.00126057	0.2756	57.8247	Ubiquitin-40S ribosomal protein S27a OS=Rattus norvegicus OX=10116 GN=Rps27a PE=1 SV=2
Q5FWT0	656	0	73656.7	4	24	0.000299769	0.0655	57.8247	Ubc protein (Fragment) OS=Rattus norvegicus OX=10116 GN=Ubc PE=2 SV=1
contaminant_UBIQUITIN08	76	0	8541.6	4	24	0.00258748	0.5658	57.8247
P0CG51	305	0	34329.5	4	24	0.000644748	0.141	57.8247	Polyubiquitin-B OS=Rattus norvegicus OX=10116 GN=Ubb PE=1 SV=1
F1LML2	810	0	90999	4	24	0.000242776	0.0531	57.8247	Polyubiquitin-C OS=Rattus norvegicus OX=10116 GN=Ubc PE=4 SV=1; Additional IDs concatenated into MaxParsimony group: Q63429, Q5FWT0, P0CG51, Q6PED0, P62982, Q6P7R7, P62986, Q63654, contaminant_UBIQUITIN08, F1LU69, F1M927, D4A0J6
Q6PED0	156	0	17921.5	4	24	0.00126057	0.2756	57.8247	RCG23287, isoform CRA_a OS=Rattus norvegicus OX=10116 GN=Rps27a PE=2 SV=1
P62986	128	0	14700.9	4	24	0.00153631	0.3359	57.8247	Ubiquitin-60S ribosomal protein L40 OS=Rattus norvegicus OX=10116 GN=Uba52 PE=1 SV=2
Q63654	100	0	11216	4	24	0.00196648	0.43	57.8247	Polyubiquitin (Fragment) OS=Rattus norvegicus OX=10116 GN=UBC PE=2 SV=1
Q6IFV4	438	0	47681.3	4	26	0.000486383	0.0685	57.6161	Keratin, type I cytoskeletal 13 OS=Rattus norvegicus OX=10116 GN=Krt13 PE=3 SV=1
F1M3X3	117	1	12987.6	3	18	0.00126057	0.2308	57.4354	Ig-like domain-containing protein OS=Rattus norvegicus OX=10116 PE=4 SV=2; Additional IDs concatenated into MaxParsimony group: M0R4X3; Additional IDs concatenated into MaxParsimony group: M0R4X3
Q3T940	266	0	29356.4	4	19	0.000585263	0.218	56.2404	Apolipoprotein H (Fragment) OS=Rattus norvegicus OX=10116 GN=Apoh PE=2 SV=1
A0A0G2JWB6	1475	0	165311	5	18	9.99906e-05	0.0536	55.0524	Peroxidasin OS=Rattus norvegicus OX=10116 GN=Pxdn PE=4 SV=1; Additional IDs concatenated into MaxParsimony group: A0A0G2KAH2; Additional IDs concatenated into MaxParsimony group: A0A0G2KAH2
A0A0G2KAH2	1237	0	138062	5	18	0.000119229	0.0639	55.0524	Peroxidasin OS=Rattus norvegicus OX=10116 GN=Pxdn PE=4 SV=1
P01015	477	4	51930.9	4	21	0.000360728	0.1069	54.7589	Angiotensinogen OS=Rattus norvegicus OX=10116 GN=Agt PE=1 SV=1
P26644	297	0	33157.1	5	23	0.000634527	0.1347	51.9731	Beta-2-glycoprotein 1 OS=Rattus norvegicus OX=10116 GN=Apoh PE=2 SV=2
Q5GAM6	145	0	16077.1	3	17	0.000960638	0.331	51.6593	Angiogenin ribonuclease 1 OS=Rattus norvegicus OX=10116 GN=Ang1 PE=3 SV=1
F1LU69	150	0	17105.9	3	20	0.00109249	0.2267	51.3653	Ubiquitin-like domain-containing protein OS=Rattus norvegicus OX=10116 GN=Rps27a-ps28 PE=4 SV=3
E9PTN6	333	0	35974.3	4	17	0.000418296	0.1291	48.5506	Glyceraldehyde-3-phosphate dehydrogenase OS=Rattus norvegicus OX=10116 PE=3 SV=1
F1LSB2	497	0	57361.2	6	15	0.000247294	0.1368	48.0971	Angiopoietin 1, isoform CRA_a OS=Rattus norvegicus OX=10116 GN=Angpt1 PE=4 SV=2; Additional IDs concatenated into MaxParsimony group: O35460, Q548N6, Q91Z91; Additional IDs concatenated into MaxParsimony group: O35460, Q548N6, Q91Z91
Q6IFV0	491	0	52545.6	4	21	0.000350442	0.0631	47.8092	Type I keratin KA11 OS=Rattus norvegicus OX=10116 GN=Ka11 PE=2 SV=1
Q6IFU9	463	0	50727.7	4	21	0.000371635	0.067	47.8092	Keratin 16 OS=Rattus norvegicus OX=10116 GN=Krt16 PE=1 SV=1
contaminant_KERATIN04	458	0	49595.4	4	20	0.000357803	0.0699	46.4741
Q64721	127	0	14733.7	4	15	0.000967757	0.3622	46.1905	Apolipoprotein BL (Fragment) OS=Rattus norvegicus OX=10116 GN=apo B PE=2 SV=1
Q5FVP9	393	0	45258.5	4	22	0.000458679	0.0662	45.1734	Cfh protein OS=Rattus norvegicus OX=10116 GN=LOC100361907 PE=2 SV=1
Q9EQV9	422	5	48777.5	5	20	0.000388326	0.1374	44.6064	Carboxypeptidase B2 OS=Rattus norvegicus OX=10116 GN=Cpb2 PE=2 SV=1
F1M4G6	319	0	33944.9	3	14	0.000359597	0.1097	43.7333	Gp_dh_N domain-containing protein OS=Rattus norvegicus OX=10116 PE=3 SV=1
Q498S9	568	0	62848.4	5	18	0.000259659	0.1391	43.6889	LOC498793 protein (Fragment) OS=Rattus norvegicus OX=10116 GN=LOC498793 PE=2 SV=1
A0A0G2K3A6	110	0	12206.9	3	16	0.00119181	0.2182	43.6528	Ig-like domain-containing protein OS=Rattus norvegicus OX=10116 PE=4 SV=1
A0A0G2K290	124	0	13877.7	3	16	0.00105725	0.1935	43.6528	Ig-like domain-containing protein OS=Rattus norvegicus OX=10116 PE=4 SV=1
M0R8Q9	117	0	12820.4	3	16	0.0011205	0.2051	43.6528	Ig-like domain-containing protein OS=Rattus norvegicus OX=10116 PE=4 SV=2
A0A0G2K304	116	0	12563.4	3	16	0.00113016	0.2069	43.6528	Ig-like domain-containing protein OS=Rattus norvegicus OX=10116 PE=4 SV=1
A0A0G2JWW4	117	0	12868.4	3	16	0.0011205	0.2051	43.6528	Ig-like domain-containing protein OS=Rattus norvegicus OX=10116 PE=4 SV=1
A0A0G2JT95	135	0	14874.5	3	16	0.000971103	0.1778	43.6528	Ig-like domain-containing protein OS=Rattus norvegicus OX=10116 PE=4 SV=1
F1LYU3	113	0	12275.9	3	16	0.00116017	0.2124	43.6528	Ig-like domain-containing protein OS=Rattus norvegicus OX=10116 PE=4 SV=2
M0RBL2	117	0	12803.1	3	16	0.0011205	0.2051	43.6528	Ig-like domain-containing protein OS=Rattus norvegicus OX=10116 PE=4 SV=1
A0A0G2K4A4	116	0	12666.3	3	16	0.00113016	0.2069	43.6528	Ig-like domain-containing protein OS=Rattus norvegicus OX=10116 PE=4 SV=1
D3ZJW6	117	1	13036.6	2	15	0.00105047	0.2051	43.5671	RCG21066 OS=Rattus norvegicus OX=10116 GN=rCG_21066 PE=1 SV=1
A0A0G2K8S2	335	0	35911.2	2	13	0.000317964	0.0866	42.4171	Gp_dh_N domain-containing protein OS=Rattus norvegicus OX=10116 PE=1 SV=1
Q71DI1	110	5	11258.8	5	16	0.00119181	0.3	42.1744	Dermcidin OS=Rattus norvegicus OX=10116 PE=2 SV=1
Q5GAM5	167	0	18497.4	2	13	0.000637831	0.1976	39.7867	Angiogenin ribonuclease 2 OS=Rattus norvegicus OX=10116 GN=Ang2 PE=1 SV=1
A0A0G2K975	764	0	85734.8	6	18	0.000193045	0.0812	39.6103	Similar to complement factor H-related protein OS=Rattus norvegicus OX=10116 GN=RGD1564614 PE=1 SV=1
G3V7P5	699	0	78227.1	6	18	0.000210996	0.0887	39.6103	RCG46174 OS=Rattus norvegicus OX=10116 GN=RGD1564614 PE=1 SV=1
Q9JLX9	97	0	10988.4	2	13	0.00109812	0.299	39.1588	Beta actin (Fragment) OS=Rattus norvegicus OX=10116 PE=2 SV=1
M0R485	435	2	47053.2	4	15	0.000282541	0.1402	37.8582	Peptidoglycan recognition protein 2 OS=Rattus norvegicus OX=10116 GN=Pglyrp2 PE=1 SV=2
Q4KM66	234	1	25657.5	4	14	0.00049022	0.1838	37.5056	LOC500183 protein OS=Rattus norvegicus OX=10116 GN=LOC500183 PE=1 SV=1; Additional IDs concatenated into MaxParsimony group: B2RZB2, F1LTN6, A0A0G2JZW1, F1M229, A0A0H2UI36, P01835, P01836, A0A142BM04; Additional IDs concatenated into MaxParsimony group: B2RZB2, F1LTN6, A0A0G2JZW1, F1M229, A0A0H2UI36, P01835, P01836, A0A142BM04
D3ZRN3	376	0	41917.9	2	13	0.000283292	0.0612	36.5453	Actin, beta-like 2 OS=Rattus norvegicus OX=10116 GN=Actbl2 PE=1 SV=1
B2RZB2	233	0	25570.5	3	13	0.000457158	0.1845	35.9094	Uncharacterized protein OS=Rattus norvegicus OX=10116 PE=2 SV=1
F1M229	189	0	20902.1	3	13	0.000563586	0.2275	35.9094	Ig-like domain-containing protein OS=Rattus norvegicus OX=10116 PE=1 SV=3
A0A0G2JZW1	223	0	24303.8	3	13	0.000477658	0.1928	35.9094	Ig-like domain-containing protein OS=Rattus norvegicus OX=10116 PE=4 SV=1
P01835	106	0	11575.5	3	13	0.00100489	0.4057	35.9094	Ig kappa chain C region, B allele OS=Rattus norvegicus OX=10116 PE=1 SV=1
F1LTN6	228	0	24881.1	3	13	0.000467183	0.1886	35.9094	Uncharacterized protein OS=Rattus norvegicus OX=10116 PE=1 SV=2
A0A0H2UI36	157	0	17020.1	3	13	0.000678457	0.2739	35.9094	Ig-like domain-containing protein OS=Rattus norvegicus OX=10116 PE=1 SV=1
Q9JL97	1084	0	123652	4	13	9.82637e-05	0.0489	35.4306	GPI-anchored ceruloplasmin OS=Rattus norvegicus OX=10116 PE=2 SV=1; Additional IDs concatenated into MaxParsimony group: A0A0G2K9I6, G3V7K3, P13635
A0A0G2K9I6	1084	0	123576	4	13	9.82637e-05	0.0489	35.4306	Ceruloplasmin OS=Rattus norvegicus OX=10116 GN=Cp PE=1 SV=1; Additional IDs concatenated into MaxParsimony group: Q9JL97, G3V7K3, P13635
G3V7K3	1059	0	120571	4	13	0.000100583	0.05	35.4306	Ceruloplasmin OS=Rattus norvegicus OX=10116 GN=Cp PE=1 SV=1
A0A0H2UHM3	346	1	38389.5	4	16	0.000378898	0.0867	34.9875	Haptoglobin OS=Rattus norvegicus OX=10116 GN=Hp PE=1 SV=1; Additional IDs concatenated into MaxParsimony group: P06866; Additional IDs concatenated into MaxParsimony group: P06866
Q71RP1	536	1	60423.6	4	18	0.000275161	0.0765	34.9065	Heparanase OS=Rattus norvegicus OX=10116 GN=Hpse PE=2 SV=1; Additional IDs concatenated into MaxParsimony group: F1M581; Additional IDs concatenated into MaxParsimony group: F1M581
A0A0G2JYX2	118	0	12836.1	1	12	0.000833255	0.1102	34.6425	Ig-like domain-containing protein OS=Rattus norvegicus OX=10116 PE=1 SV=1
D3ZE00	98	0	10824.2	1	12	0.00100331	0.1327	34.6425	Ig-like domain-containing protein OS=Rattus norvegicus OX=10116 PE=1 SV=3
A0A0G2K473	117	0	12957.4	1	12	0.000840377	0.1111	34.6425	Ig-like domain-containing protein OS=Rattus norvegicus OX=10116 PE=4 SV=1
A0A0G2JUY4	110	0	12394	1	12	0.000893856	0.1182	34.6425	Ig-like domain-containing protein OS=Rattus norvegicus OX=10116 PE=1 SV=1
M0R5S4	118	0	13185.4	1	12	0.000833255	0.1102	34.6425	Ig-like domain-containing protein OS=Rattus norvegicus OX=10116 PE=4 SV=1
F1M0H4	118	0	13168.2	1	12	0.000833255	0.1102	34.6425	Ig-like domain-containing protein OS=Rattus norvegicus OX=10116 PE=4 SV=2
M0R3Y4	118	0	12816.9	1	12	0.000833255	0.1102	34.6425	Ig-like domain-containing protein OS=Rattus norvegicus OX=10116 PE=4 SV=1
A0A0G2K758	166	0	18191.1	1	12	0.000592314	0.0783	34.6425	Ig-like domain-containing protein OS=Rattus norvegicus OX=10116 PE=4 SV=1
A0A0U1RRP9	1115	1	123874	5	12	8.81831e-05	0.0493	33.6999	Complement factor B OS=Rattus norvegicus OX=10116 GN=Cfb PE=1 SV=1; Additional IDs concatenated into MaxParsimony group: Q7TP05, G3V615, Q6MG74; Additional IDs concatenated into MaxParsimony group: Q7TP05, G3V615, Q6MG74
P06866	347	0	38520.5	3	15	0.000354194	0.0865	33.5985	Haptoglobin OS=Rattus norvegicus OX=10116 GN=Hp PE=1 SV=3
P31211	396	4	44624.3	5	16	0.000331058	0.1263	32.1482	Corticosteroid-binding globulin OS=Rattus norvegicus OX=10116 GN=Serpina6 PE=1 SV=2
G3V615	763	0	85280.7	4	11	0.000118126	0.0721	31.9687	Complement factor B OS=Rattus norvegicus OX=10116 GN=Cfb PE=1 SV=1
Q7TP05	1116	0	123942	4	11	8.07621e-05	0.0493	31.9687	Complement factor B OS=Rattus norvegicus OX=10116 GN=Cfb PE=1 SV=1
Q6MG74	761	0	85048.6	4	11	0.000118437	0.0723	31.9687	B-factor, properdin OS=Rattus norvegicus OX=10116 GN=Cfb PE=2 SV=1
F1LUV3	326	0	35113.9	3	11	0.000276474	0.1074	31.1931	Gp_dh_N domain-containing protein OS=Rattus norvegicus OX=10116 PE=1 SV=3
Q5I0H8	333	2	36634.8	4	13	0.000319873	0.0961	30.924	LOC299567 protein (Fragment) OS=Rattus norvegicus OX=10116 GN=LOC299567 PE=2 SV=1
Q6LC76	190	0	20510.4	1	8	0.000344997	0.1	30.6715	Fibronectin (Fragment) OS=Rattus norvegicus OX=10116 GN=fn-1 PE=4 SV=1
P19939	88	1	9836.3	4	15	0.00139665	0.4205	30.5909	Apolipoprotein C-I OS=Rattus norvegicus OX=10116 GN=Apoc1 PE=3 SV=1; Additional IDs concatenated into MaxParsimony group: A0A0G2K9R5, M0R547; Additional IDs concatenated into MaxParsimony group: A0A0G2K9R5, M0R547
B6VNU2	46	0	5309.5	2	18	0.00320622	0.3261	29.9919	Phospholipase A2 (Fragment) OS=Rattus norvegicus OX=10116 GN=Pla2g2a PE=3 SV=1
Q9EQV8	457	2	51930.1	2	8	0.000143434	0.081	29.8034	Carboxypeptidase N catalytic chain OS=Rattus norvegicus OX=10116 GN=Cpn1 PE=2 SV=1
G3V836	447	0	51369.3	4	10	0.000183304	0.1163	29.0779	Clusterin OS=Rattus norvegicus OX=10116 GN=Clu PE=1 SV=1; Additional IDs concatenated into MaxParsimony group: Q6P7S6, P05371, Q9ERD1, O35510, A0A0G2KB42
Q9ERD1	218	0	24897.2	4	10	0.000375857	0.2385	29.0779	Clusterin (Fragment) OS=Rattus norvegicus OX=10116 PE=2 SV=1
P05371	447	0	51324.3	4	10	0.000183304	0.1163	29.0779	Clusterin OS=Rattus norvegicus OX=10116 GN=Clu PE=1 SV=2; Additional IDs concatenated into MaxParsimony group: Q6P7S6, G3V836, Q9ERD1, A0A0G2KB42, O35510
Q6P7S6	447	0	51413.4	4	10	0.000183304	0.1163	29.0779	Clusterin OS=Rattus norvegicus OX=10116 GN=Clu PE=2 SV=1
P01836	106	0	11706.6	2	10	0.000772988	0.2547	29.04	Ig kappa chain C region, A allele OS=Rattus norvegicus OX=10116 PE=1 SV=1
E9PTV9	333	0	35816	3	10	0.000246056	0.1021	28.851	Glyceraldehyde-3-phosphate dehydrogenase OS=Rattus norvegicus OX=10116 PE=1 SV=2
F1LMS5	959	0	105751	2	17	0.000145248	0.0073	28.6933	Thrombospondin-4 OS=Rattus norvegicus OX=10116 GN=Thbs4 PE=4 SV=1
M0RBU0	755	0	82482.6	2	17	0.000184493	0.0093	28.6933	Cartilage oligomeric matrix protein OS=Rattus norvegicus OX=10116 GN=Comp PE=4 SV=1
A0A0G2K7L8	961	0	105963	2	17	0.000144945	0.0073	28.6933	Thrombospondin-4 OS=Rattus norvegicus OX=10116 GN=Thbs4 PE=4 SV=1
A0A0G2JZH3	955	0	104048	2	17	0.000145856	0.0073	28.6933	Thrombospondin 3 OS=Rattus norvegicus OX=10116 GN=Thbs3 PE=4 SV=1
P49744	980	0	108127	2	17	0.000142135	0.0071	28.6933	Thrombospondin-4 OS=Rattus norvegicus OX=10116 GN=Thbs4 PE=1 SV=1
A0A0G2JXN9	109	0	12767.3	2	17	0.00127791	0.0642	28.6933	Cartilage oligomeric matrix protein (Fragment) OS=Rattus norvegicus OX=10116 GN=Comp PE=4 SV=2
P35444	755	0	82592.7	2	17	0.000184493	0.0093	28.6933	Cartilage oligomeric matrix protein OS=Rattus norvegicus OX=10116 GN=Comp PE=1 SV=1
D3ZUU6	202	1	22274.1	1	8	0.000324502	0.0594	28.3043	C-type lectin domain family 3, member B OS=Rattus norvegicus OX=10116 GN=Clec3b PE=1 SV=1
A0A221LEF7	474	0	51935.7	2	14	0.000242007	0.019	28.1238	Keratin 25 OS=Rattus norvegicus OX=10116 GN=krt25 PE=2 SV=1
Q6IFW8	449	0	49060.3	2	14	0.000255482	0.02	28.1238	Keratin, type I cytoskeletal 27 OS=Rattus norvegicus OX=10116 GN=Krt27 PE=3 SV=1
Q6IFX0	446	0	48895.2	2	14	0.000257201	0.0202	28.1238	Keratin, type I cytoskeletal 25 OS=Rattus norvegicus OX=10116 GN=Krt25 PE=3 SV=1
F1LQT4	565	0	62582.2	3	12	0.000174025	0.0513	27.9249	Carboxypeptidase N subunit 2 OS=Rattus norvegicus OX=10116 GN=Cpn2 PE=1 SV=1; Additional IDs concatenated into MaxParsimony group: B1H247; Additional IDs concatenated into MaxParsimony group: B1H247
B1H247	543	0	60274	3	12	0.000181076	0.0534	27.9249	Uncharacterized protein (Fragment) OS=Rattus norvegicus OX=10116 PE=2 SV=1
P31721	253	0	26554.8	2	10	0.000323861	0.1028	26.7559	Complement C1q subcomponent subunit B OS=Rattus norvegicus OX=10116 GN=C1qb PE=1 SV=2; Additional IDs concatenated into MaxParsimony group: G3V7N9; Additional IDs concatenated into MaxParsimony group: G3V7N9
G3V7N9	253	0	26612.8	2	10	0.000323861	0.1028	26.7559	Adiponectin a OS=Rattus norvegicus OX=10116 GN=C1qb PE=1 SV=1
A0A0G2K828	119	0	13195.6	1	10	0.000688544	0.0756	25.8223	Ig-like domain-containing protein OS=Rattus norvegicus OX=10116 PE=4 SV=1
D3Z9Z0	1707	3	186990	3	7	3.36003e-05	0.0281	25.7133	Ankyrin 1 OS=Rattus norvegicus OX=10116 GN=Ank1 PE=1 SV=1
Q5BJY9	423	0	47714.3	2	15	0.000290556	0.0331	25.3633	Keratin, type I cytoskeletal 18 OS=Rattus norvegicus OX=10116 GN=Krt18 PE=1 SV=3
O35460	497	0	57406.1	5	9	0.000148376	0.1087	24.3369	Angiopoietin-1 OS=Rattus norvegicus OX=10116 GN=Angpt1 PE=2 SV=2
Q4V8L0	211	0	24191.8	2	11	0.000427159	0.0948	24.2901	Metalloproteinase inhibitor 3 OS=Rattus norvegicus OX=10116 GN=Timp3 PE=1 SV=1; Additional IDs concatenated into MaxParsimony group: P48032; Additional IDs concatenated into MaxParsimony group: P48032
P48032	211	0	24191.8	2	11	0.000427159	0.0948	24.2901	Metalloproteinase inhibitor 3 OS=Rattus norvegicus OX=10116 GN=Timp3 PE=2 SV=1
Q91Z91	89	0	10194.4	1	6	0.000552383	0.1573	23.7602	Angiopoietin 1 (Fragment) OS=Rattus norvegicus OX=10116 PE=2 SV=1
Q548N6	110	0	12833.7	1	6	0.000446928	0.1273	23.7602	Angiopoietin-1 (Fragment) OS=Rattus norvegicus OX=10116 PE=2 SV=1
D3ZWV2	325	0	34971.8	2	8	0.000201691	0.0646	23.6958	Glyceraldehyde-3-phosphate dehydrogenase OS=Rattus norvegicus OX=10116 PE=3 SV=3
D3ZME3	310	0	33387.9	2	8	0.00021145	0.0677	23.6958	Gp_dh_N domain-containing protein OS=Rattus norvegicus OX=10116 PE=1 SV=1
A0A0G2K9R5	69	0	7539.1	3	11	0.00130624	0.4058	23.4299	Apolipoprotein C-I OS=Rattus norvegicus OX=10116 GN=Apoc1 PE=4 SV=1
F1M581	535	0	60820.8	3	12	0.000183783	0.0579	23.1723	Heparanase OS=Rattus norvegicus OX=10116 GN=Hpse PE=4 SV=3
F1LUI2	198	0	21434.9	1	7	0.000289675	0.0758	22.3796	Gp_dh_C domain-containing protein OS=Rattus norvegicus OX=10116 PE=4 SV=3
A0A0G2JYY8	335	0	35814.8	1	7	0.000171211	0.0448	22.3796	Gp_dh_N domain-containing protein OS=Rattus norvegicus OX=10116 PE=1 SV=1
M0R4X3	96	0	10682.2	2	8	0.000682806	0.1146	21.4956	Ig-like domain-containing protein OS=Rattus norvegicus OX=10116 PE=1 SV=1
Q498M9	335	0	36114.1	2	7	0.000171211	0.0597	21.3537	Similar to glyceraldehyde-3-phosphate dehydrogenase OS=Rattus norvegicus OX=10116 GN=LOC303448 PE=1 SV=1
F1LP05	553	0	59757.7	1	8	0.000118534	0.0235	21.2892	ATP synthase subunit alpha OS=Rattus norvegicus OX=10116 GN=Atp5f1a PE=1 SV=1; Additional IDs concatenated into MaxParsimony group: P15999; Additional IDs concatenated into MaxParsimony group: P15999
P15999	553	0	59698.6	1	8	0.000118534	0.0235	21.2892	ATP synthase subunit alpha, mitochondrial OS=Rattus norvegicus OX=10116 GN=Atp5f1a PE=1 SV=2
W0UVG1	147	0	16874.3	2	8	0.000445914	0.1633	21.0219	Ribonuclease A b1 OS=Rattus norvegicus OX=10116 GN=Rnase4 PE=3 SV=1
O55004	147	0	16874.3	2	8	0.000445914	0.1633	21.0219	Ribonuclease 4 OS=Rattus norvegicus OX=10116 GN=Rnase4 PE=1 SV=1; Additional IDs concatenated into MaxParsimony group: W0UVG1; Additional IDs concatenated into MaxParsimony group: W0UVG1
M0R757	462	0	50058.1	2	9	0.000159617	0.0498	20.9412	Elongation factor 1-alpha OS=Rattus norvegicus OX=10116 GN=LOC100360413 PE=3 SV=1; Additional IDs concatenated into MaxParsimony group: P62630, P62632, F1M6C2
P62630	462	0	50064.1	2	9	0.000159617	0.0498	20.9412	Elongation factor 1-alpha 1 OS=Rattus norvegicus OX=10116 GN=Eef1a1 PE=2 SV=1; Additional IDs concatenated into MaxParsimony group: M0R757, P62632, F1M6C2
F1M8E9	148	1	16689.2	2	7	0.000387539	0.0811	20.7404	Lysozyme OS=Rattus norvegicus OX=10116 GN=Lyz2 PE=1 SV=1; Additional IDs concatenated into MaxParsimony group: B2RYD4, A0A0G2K5X1, P00697, Q05820, Q6PDV1; Additional IDs concatenated into MaxParsimony group: B2RYD4, A0A0G2K5X1, Q6PDV1, P00697, Q05820
F1M2N4	280	0	30373.2	1	6	0.000175579	0.05	20.0375	Gp_dh_N domain-containing protein OS=Rattus norvegicus OX=10116 PE=1 SV=2
D3ZEN2	142	0	15345.7	1	6	0.000346212	0.0986	20.0375	Gp_dh_C domain-containing protein OS=Rattus norvegicus OX=10116 PE=4 SV=2
D4A678	2416	1	279884	3	6	2.03485e-05	0.017	19.8847	Spectrin, alpha, erythrocytic 1 OS=Rattus norvegicus OX=10116 GN=Spta1 PE=1 SV=3; Additional IDs concatenated into MaxParsimony group: Q6XDA1; Additional IDs concatenated into MaxParsimony group: Q6XDA1
Q7TPA5	422	3	46976.6	3	8	0.00015533	0.0853	19.8219	Serpin A11 OS=Rattus norvegicus OX=10116 GN=Serpina11 PE=2 SV=2
A0A0G2JW58	298	0	33466.4	2	7	0.000192469	0.0738	19.6854	Type I keratin KA11 (Fragment) OS=Rattus norvegicus OX=10116 GN=Ka11 PE=3 SV=1
A0A0G2JU48	435	0	46372.9	2	7	0.000131852	0.0506	19.6854	Type I keratin KA11 OS=Rattus norvegicus OX=10116 GN=Ka11 PE=3 SV=1
F1LXY6	100	1	11221.5	1	10	0.000819368	0.09	19.6725	Ig-like domain-containing protein OS=Rattus norvegicus OX=10116 PE=1 SV=2
A0A142BM04	203	0	22278	1	6	0.000242178	0.064	19.5825	Anti-F4/80 kappa light chain variable region (Fragment) OS=Rattus norvegicus OX=10116 PE=2 SV=1
B2RYD4	155	0	17064.1	1	6	0.000317175	0.0774	19.0176	Lysozyme OS=Rattus norvegicus OX=10116 GN=Lyc2 PE=2 SV=1
Q6PDV1	148	0	16701.3	1	6	0.000332176	0.0811	19.0176	Lysozyme OS=Rattus norvegicus OX=10116 GN=Lyz2 PE=2 SV=1
P00697	148	0	16700.3	1	6	0.000332176	0.0811	19.0176	Lysozyme C-1 OS=Rattus norvegicus OX=10116 GN=Lyz1 PE=1 SV=2
Q05820	148	0	16589.2	1	6	0.000332176	0.0811	19.0176	Putative lysozyme C-2 OS=Rattus norvegicus OX=10116 GN=Lyz2 PE=5 SV=1
A0A0G2K5X1	150	0	16789.3	1	6	0.000327747	0.08	19.0176	Lysozyme OS=Rattus norvegicus OX=10116 GN=Lyc2 PE=3 SV=1
A0A0G2K4H9	483	0	52009.5	1	8	0.000135713	0.0186	18.3074	Keratin, type I cytoskeletal 12 OS=Rattus norvegicus OX=10116 GN=Krt12 PE=3 SV=1
Q6IFW5	456	0	48772	1	8	0.000143749	0.0197	18.3074	Keratin, type I cytoskeletal 12 OS=Rattus norvegicus OX=10116 GN=Krt12 PE=3 SV=1
contaminant_NRL_1IKFH	228	0	24722.2	1	6	0.000215623	0.0526	17.909	Immunoglobulin igg1-kappa antibody fragment fab complexed With...
contaminant_NRL_1INDH	213	0	22606.4	1	6	0.000230808	0.0563	17.909	Cha255 immunoglobulin fab' fragment (igg1-lambda) complex With...
A0A0G2K8Q1	100	2	11004.5	3	5	0.000409684	0.39	17.7814	Apolipoprotein C-III OS=Rattus norvegicus OX=10116 GN=Apoc3 PE=1 SV=1; Additional IDs concatenated into MaxParsimony group: P06759; Additional IDs concatenated into MaxParsimony group: P06759
Q699Y0	486	0	50980.7	2	8	0.000134875	0.0391	17.7535	60 kDa chaperonin (Fragment) OS=Bartonella rattimassiliensis OX=270250 PE=3 SV=1; Additional IDs concatenated into MaxParsimony group: Q699Y1; Additional IDs concatenated into MaxParsimony group: Q699Y1
Q699Y1	482	0	50620.6	2	8	0.000135995	0.0394	17.7535	60 kDa chaperonin (Fragment) OS=Bartonella rattimassiliensis OX=270250 PE=3 SV=1
B0BNN4	465	2	50520.6	2	7	0.000123346	0.028	17.5168	Complement factor properdin OS=Rattus norvegicus OX=10116 GN=Cfp PE=1 SV=1
Q4KM33	350	1	39952.5	3	7	0.000163874	0.1257	17.2874	Pleckstrin OS=Rattus norvegicus OX=10116 GN=Plek PE=1 SV=1; Additional IDs concatenated into MaxParsimony group: A0A0G2K393; Additional IDs concatenated into MaxParsimony group: A0A0G2K393
Q9R0T4	886	2	98636.2	2	8	7.39835e-05	0.0271	17.1452	Cadherin-1 OS=Rattus norvegicus OX=10116 GN=Cdh1 PE=1 SV=1
D3ZJF8	2584	1	274962	1	10	3.17093e-05	0.0035	17.1023	Fc fragment of IgG-binding protein OS=Rattus norvegicus OX=10116 GN=Fcgbp PE=1 SV=3
Q63052	989	1	113217	4	7	5.79937e-05	0.0394	16.9281	Apolipoprotein B (Fragment) OS=Rattus norvegicus OX=10116 GN=apoB PE=2 SV=1
F1MAA9	326	0	37368.2	1	8	0.000201072	0.0307	16.8645	Serpin family B member 3 OS=Rattus norvegicus OX=10116 GN=Serpinb3 PE=3 SV=2
D3ZPF9	421	0	47482.5	1	8	0.000155699	0.0238	16.8645	Serpin family B member 12 OS=Rattus norvegicus OX=10116 GN=Serpinb12 PE=3 SV=1
Q6IE44	326	0	37324.1	1	8	0.000201072	0.0307	16.8645	Serine protease inhibitor B3 OS=Rattus norvegicus OX=10116 GN=Serpinb3 PE=2 SV=1
D3ZJK2	387	0	44387.1	1	8	0.000169378	0.0258	16.8645	Serine (or cysteine) peptidase inhibitor, clade B (ovalbumin), member 3A OS=Rattus norvegicus OX=10116 GN=Serpinb3a PE=3 SV=1
Q6IFW2	431	0	48246.6	1	9	0.000171098	0.0162	16.4776	Keratin, type I cytoskeletal 40 OS=Rattus norvegicus OX=10116 GN=Krt40 PE=3 SV=1
contaminant_KERATIN09	429	0	47879.5	1	9	0.000171895	0.0163	16.4776
Q6IFV7	455	0	51493.8	1	9	0.000162073	0.0154	16.4776	Keratin 32 OS=Rattus norvegicus OX=10116 GN=Krt32 PE=2 SV=1
Q6IFW7	383	0	41281.6	1	9	0.000192541	0.0183	16.4776	Keratin 28 OS=Rattus norvegicus OX=10116 GN=Krt28 PE=2 SV=1
Q6IFW0	404	0	45788.2	1	9	0.000182532	0.0173	16.4776	RCG32608 OS=Rattus norvegicus OX=10116 GN=Krt33b PE=2 SV=1
Q6IFX1	491	0	52329.2	1	9	0.00015019	0.0143	16.4776	Keratin, type I cytoskeletal 24 OS=Rattus norvegicus OX=10116 GN=Krt24 PE=3 SV=1
A0A096MJE0	416	0	47381.9	1	9	0.000177267	0.0168	16.4776	Keratin 32 (Fragment) OS=Rattus norvegicus OX=10116 GN=Krt32 PE=3 SV=1
Q6IFV8	414	0	46693.6	1	9	0.000178123	0.0169	16.4776	Type I hair keratin KA25 OS=Rattus norvegicus OX=10116 GN=Krt31 PE=2 SV=1
Q6IFV6	455	0	50624.6	1	9	0.000162073	0.0154	16.4776	Keratin 35 OS=Rattus norvegicus OX=10116 GN=Krt35 PE=2 SV=1
Q6IFV5	468	0	52202.8	1	9	0.000157571	0.015	16.4776	Keratin 36 OS=Rattus norvegicus OX=10116 GN=Krt36 PE=2 SV=1
F1MAS0	455	0	51479.7	1	9	0.000162073	0.0154	16.4776	Keratin 32 OS=Rattus norvegicus OX=10116 GN=Krt32 PE=3 SV=2
F1MAF7	414	0	46789.7	1	9	0.000178123	0.0169	16.4776	Keratin 31 OS=Rattus norvegicus OX=10116 GN=Krt31 PE=3 SV=2
F1LWD0	106	2	11894.9	2	6	0.000463793	0.2358	16.4591	Ig-like domain-containing protein OS=Rattus norvegicus OX=10116 PE=1 SV=2
B2GVB9	665	2	75556.9	2	7	8.62492e-05	0.0286	15.6627	Fermitin family member 3 OS=Rattus norvegicus OX=10116 GN=Fermt3 PE=1 SV=1
P20767	104	3	11292.6	3	7	0.000551498	0.3942	15.3302	Ig lambda-2 chain C region OS=Rattus norvegicus OX=10116 PE=4 SV=1
Q6XDA1	2385	0	276433	2	4	1.3742e-05	0.0172	14.8513	Erythroid spectrin alpha OS=Rattus norvegicus OX=10116 GN=Spta1 PE=1 SV=1
A0A0G2K393	327	0	37208	2	5	0.000125286	0.1162	14.6685	Pleckstrin OS=Rattus norvegicus OX=10116 GN=Plek PE=1 SV=1
D3Z7Y6	431	0	49050.9	1	5	9.50543e-05	0.0255	13.8104	Keratin, type I cytoskeletal 20 OS=Rattus norvegicus OX=10116 GN=Krt20 PE=1 SV=3
A0A0G2K623	214	0	24898	1	5	0.000191441	0.0514	13.8104	Keratin, type I cytoskeletal 20 (Fragment) OS=Rattus norvegicus OX=10116 GN=Krt20 PE=1 SV=1
contaminant_KERATIN11	424	0	48438.9	1	5	9.66236e-05	0.0259	13.8104
P25030	429	0	49339.3	1	5	9.54974e-05	0.0256	13.8104	Keratin, type I cytoskeletal 20 OS=Rattus norvegicus OX=10116 GN=Krt20 PE=1 SV=2
A0A0G2JZS9	97	1	10786.2	1	4	0.000337884	0.1546	13.4764	Ig-like domain-containing protein OS=Rattus norvegicus OX=10116 PE=1 SV=1
P13635	1059	0	120746	3	6	4.64231e-05	0.0349	13.0573	Ceruloplasmin OS=Rattus norvegicus OX=10116 GN=Cp PE=1 SV=3
F1M927	154	0	17843.4	2	8	0.000425646	0.1169	13.0274	Ubiquitin-like domain-containing protein OS=Rattus norvegicus OX=10116 PE=4 SV=2
Q78EF2	70	0	8091.2	1	4	0.00046821	0.2	12.722	Rat apolipoprotein B (apoB) (Fragment) OS=Rattus norvegicus OX=10116 PE=2 SV=1
F1M6C2	410	0	44256.7	1	6	0.000119907	0.0268	12.4743	Tr-type G domain-containing protein OS=Rattus norvegicus OX=10116 PE=1 SV=1
P62632	463	0	50404.3	1	6	0.000106182	0.0238	12.4743	Elongation factor 1-alpha 2 OS=Rattus norvegicus OX=10116 GN=Eef1a2 PE=1 SV=1
P70565	745	0	81707.7	1	4	4.39929e-05	0.0242	12.3148	Plakoglobin OS=Rattus norvegicus OX=10116 PE=2 SV=1
Q6P0K8	745	0	81730.8	1	4	4.39929e-05	0.0242	12.3148	Junction plakoglobin OS=Rattus norvegicus OX=10116 GN=Jup PE=1 SV=1; Additional IDs concatenated into MaxParsimony group: P70565; Additional IDs concatenated into MaxParsimony group: P70565
Q498D4	1552	0	161859	3	6	3.16766e-05	0.0193	12.0335	Tln1 protein OS=Rattus norvegicus OX=10116 GN=Tln1 PE=2 SV=1
M0R547	88	0	9672.3	2	7	0.00065177	0.1818	11.4837	Apolipoprotein C-I-like OS=Rattus norvegicus OX=10116 GN=LOC100910181 PE=4 SV=1
D4A1S0	679	1	76011.8	3	5	6.03364e-05	0.0383	10.9984	Complement C1s subcomponent OS=Rattus norvegicus OX=10116 GN=C1s PE=1 SV=3; Additional IDs concatenated into MaxParsimony group: G3V7L3, Q6P6T1; Additional IDs concatenated into MaxParsimony group: G3V7L3, Q6P6T1
Q6LE95	56	0	5992	1	6	0.000877894	0.1429	10.9863	Kininogen OS=Rattus norvegicus OX=10116 PE=4 SV=1
F1M3H2	99	1	11163.3	2	5	0.000413822	0.202	10.9192	Ig-like domain-containing protein OS=Rattus norvegicus OX=10116 PE=4 SV=2; Additional IDs concatenated into MaxParsimony group: P01805, M0RDF2; Additional IDs concatenated into MaxParsimony group: P01805, M0RDF2
contaminant_NRL_1MCOL	216	1	22783	1	3	0.000113801	0.0694	10.5502	Immunoglobulin g1 (igg1) (mcg) with a hinge deletion, chain L...
P27139	260	1	29077.6	1	3	9.45424e-05	0.0615	10.4738	Carbonic anhydrase 2 OS=Rattus norvegicus OX=10116 GN=Ca2 PE=1 SV=2
Q64599	216	0	24057.5	1	6	0.000227602	0.0324	10.1628	Hemiferrin OS=Rattus norvegicus OX=10116 GN=LOC286987 PE=2 SV=1
Q63030	35	0	3521.6	1	5	0.00117053	0.2857	10.1456	Rat alpha-smooth muscle actin mRNA (Fragment) OS=Rattus norvegicus OX=10116 PE=2 SV=1
Q9JJS8	685	0	75600	1	3	3.58847e-05	0.0219	9.719	Mannan-binding lectin serine protease 2 OS=Rattus norvegicus OX=10116 GN=Masp2 PE=1 SV=2
A2VCV7	685	0	75506.9	1	3	3.58847e-05	0.0219	9.719	Mannan-binding lectin serine peptidase 2 OS=Rattus norvegicus OX=10116 GN=Masp2 PE=1 SV=1; Additional IDs concatenated into MaxParsimony group: Q9JJS8; Additional IDs concatenated into MaxParsimony group: Q9JJS8
A0A0G2K2C3	119	0	13627.3	1	6	0.000413127	0.084	9.3084	1-acylglycerol-3-phosphate O-acyltransferase 1 (Fragment) OS=Rattus norvegicus OX=10116 GN=Agpat1 PE=4 SV=4; Additional IDs concatenated into MaxParsimony group: A0A0G2JYX6; Additional IDs concatenated into MaxParsimony group: A0A0G2JYX6
A0A0G2JYX6	94	0	10841.9	1	6	0.000523001	0.1064	9.3084	1-acylglycerol-3-phosphate O-acyltransferase 1 (Fragment) OS=Rattus norvegicus OX=10116 GN=Agpat1 PE=4 SV=1
Q6P6T1	688	0	77003.8	2	4	4.76377e-05	0.0378	9.3004	Complement C1s subcomponent OS=Rattus norvegicus OX=10116 GN=C1s PE=2 SV=2
G3V7L3	694	0	77645.1	2	4	4.72258e-05	0.0375	9.3004	Complement C1s subcomponent OS=Rattus norvegicus OX=10116 GN=C1s PE=1 SV=1
Q4G047	437	0	50940.1	2	3	5.62495e-05	0.0595	9.2819	Apob protein (Fragment) OS=Rattus norvegicus OX=10116 GN=Apob PE=2 SV=1
P01805	142	0	15995.9	1	4	0.000230808	0.0634	9.257	Ig heavy chain V region IR2 OS=Rattus norvegicus OX=10116 PE=4 SV=1
[truncated: 75 more rows]

## Sheet: Table S1H
Table S1H - Number and percentage of proteins found related to each biological process for the Cit-MNPs incubated in plasma for 30 min.
[truncated: 11 more rows]

[truncated: 10 more sheets: Table S1I, Table S1J, Table S1K, Table S1L, Table S1M, Table S1N, Table S1O, Table S1P, Table S1Q, Table S1R]
